# Supplementary material for: Host-pathogen genetic interactions underlie tuberculosis susceptibility in genetically diverse mice
Source: eLife. 2022 Feb 3;11:e74419. doi: 10.7554/eLife.74419 (PMC8846590; doi:10.7554/eLife.74419)
Supplement: Figure 4—source data 1. — LFC values represent the log2 fold change (LFC) between input and mouse-selected pools. ‘NA’ indicates genes with fewer than three occupied TA transposon insertion sites for the indicated comparison. Qvals represent adjusted p-values comparing mutant abundance in input and selected pools. ‘NA’ indicates genes with fewer than three occupied TA transposon insertion sites for the indicated comparison. Required in vivo: ‘TRUE’ indicates the mutant is significantly underrepresented (Qval <0.05) after in mouse-selection in at least two mouse strains. Required in B6: ‘TRUE’ indicates the mutant is significantly underrepresented (Qval <0.05) after in selection in B6 mice. Required in KO mice: "TRUE" indicates the mutant is significantly underrepresented (Qval <0.05) after in selection in Rag-/-, Nos2-/-, Cybb-/-, or Ifnγ-/- mice. Core gene set: ‘TRUE’ indicates the mutant is significantly underrepresented (Qval <0.05) in 30 mouse strains. U = uninformative; fewer than three occupied TA transposon insertion sites in all strains in panel. F = filtered; essential in only a single strain. ‘Module’ corresponds to WGCNA module number as illustrated in Figure 5A. Mouse strains are listed in the same order as Figure 5B, with the corresponding cluster designation. [file elife-74419-fig4-data1.xlsx]

## Sheet: LFC
Figure4-SourceData1: TnSeq Summary Table
LFC values represent the log2 fold-change (LFC) between input and mouse-selected pools. "NA" indicates genes with fewer than 3 occupied TA transposon insertion sites for the indicated comparison.
Qvals represent adjusted P values (Bonferroni-Hochberg) comparing mutant abundance in input and selected pools. "NA" indicates genes with fewer than 3 occupied TA transposon insertion sites for the indicated comparison.
Required in vivo: "TRUE" indicates the mutant is significantly underrepresented (Qval <0.05) after in-mouse selection in at least two mouse strains.
Required in B6: "TRUE" indicates the mutant is significantly underrepresented (Qval <0.05) after selection in B6 mice.
Required in KO mice: "TRUE" indicates the mutant is significantly underrepresented (Qval <0.05) after selection in Rag-/-, Nos2-/-, Cybb-/-, or Ifng-/- mice.
Core gene set: TRUE indicates the mutant is significantly underrepresented (Qval <0.05) in 30 mouse strains.
U = uninformative; fewer than 3 occupied TA transposon insertion sites in all strains in panel
F = filtered; essential in only a single strain
"Module" corresponds to WGCNA module number as illustrated in Figure 5A.
Mouse strains are listed in the same order as Figure 5B, with the corresponding cluster designation.
			Required	Required	Required	Core	Cluster A										Cluster B								Cluster C								Cluster D											Cluster E
orf	gene	module	in vivo	in B6	in KO mice	gene set	CC030	C57BL.6J	CC011	CC028	CC016	CC001	NZO.H1LtJ	CC007	CC043	CC031	129s1.SvImJ	NOD.ShiLtJ	CC027	CC045	CC034	CC037	CC044	CC046	A.J	CC033	CC057	CC047	CC035	CC008	CC022	CC056	CC006	CC051	Cast.EiJ	PWK.PhJ	CC025	CC010	CC012	CC059	CC013	CC021	CC061	CC024	CC018	CC003	CC005	CC032	CC015
RVBD_0101	nrp	mod01	TRUE	TRUE	TRUE	TRUE	-1.91571	-1.81648	-1.85489	-0.218352	-1.38718	-1.91818	-1.51079	-1.74711	-0.910408	-2.11916	-1.23766	-0.60961	-2.06652	-2.131	-0.285615	-1.93835	-2.25299	-0.831295	-2.46414	-1.77512	-1.48028	-1.81317	-2.21128	-1.50765	-2.0244	-2.5657	-1.69018	-1.60553	-1.91818	-2.43707	-2.20968	-0.754339	-1.75703	-0.423534	-1.10821	-1.80985	-0.723315	-1.77971	-2.14007	-1.54691	-2.47807	-1.52699	-2.02447
RVBD_3135	PPE50	mod02	TRUE	FALSE	TRUE	FALSE	-0.444268	-0.10073	-0.349135	-0.186704	-0.280856	-0.895029	-0.735657	0.0994121	-0.0149835	0.17563	-1.12166	-1.11677	-0.790981	-1.28002	-0.334766	-0.0313818	0.0762435	-0.934924	-1.14258	1.21598	-0.566216	-0.152664	-0.485763	0.135426	-0.963343	-0.568806	-0.454367	-0.549172	-0.895029	-1.17051	-0.542536	0.0803315	-0.751398	-0.940814	-0.529278	0.525987	-0.0214392	-0.356642	-0.946659	-0.828649	-0.963577	-0.897056	-1.31523
RVBD_3136	PPE51	mod02	TRUE	FALSE	TRUE	TRUE	-0.518635	-0.296919	-0.394251	-0.924201	-0.703164	-1.48592	-0.751963	-0.607361	-0.357782	0.819191	-1.44212	-1.58348	-1.56429	-1.92781	-0.874011	0.150304	-0.342252	-1.04258	-1.52951	1.44917	-0.703537	-0.264856	-0.75973	-0.308033	-1.38614	-0.936757	-1.04035	-1.4911	-1.48592	-1.70953	-0.700238	0.251307	-1.18293	-1.02033	-0.450769	0.291815	0.518525	-0.621746	-1.22629	-1.10166	-1.35332	-1.27209	-1.85437
RVBD_3220c	Rv3220c	mod02	TRUE	FALSE	TRUE	FALSE	1.16946	0.0712376	-0.773553	-0.0751652	0.00785747	-0.600562	-0.229237	0.834071	0.375724	0.761342	-0.952371	-1.06869	-1.38192	-2.80285	-0.537066	1.06859	0.147661	-1.59479	-0.835224	1.64938	-0.251632	-0.43	0.0171948	1.2348	0.314501	0.542305	-0.739774	-0.627468	-0.600562	-1.4415	0.2723	0.29751	-0.61519	-0.244575	0.803505	1.37598	0.679147	0.195009	-0.0734016	0.0685457	-0.31356	-0.828235	-1.19702
RVBD_0485	Rv0485	mod03	TRUE	TRUE	TRUE	TRUE	-3.59135	-2.95336	-2.99971	-1.19904	-3.38755	-2.83617	-2.11484	-2.64231	-0.926689	-4.3956	-1.19362	-0.544537	-3.2815	-2.85286	-1.08447	-3.87561	-3.01281	-3.22248	-3.07847	-3.60503	-1.55399	-3.11138	-2.93022	-1.81852	-3.60566	-2.09658	-2.36265	-2.03883	-2.83617	-1.57367	-2.88524	-1.16384	-2.63962	-0.985064	-0.752744	-2.34936	-2.55809	-3.06325	-4.31015	-4.67854	-4.09765	-3.02052	-4.45245
RVBD_3484	cpsA	mod03	TRUE	TRUE	TRUE	TRUE	-4.20359	-4.26051	-5.64566	-6.03629	-4.51409	-4.40391	-0.354879	-2.03839	-1.26325	-12.0986	-1.29741	-0.479433	-4.91733	-8.14387	-6.62745	-6.28783	-13.0972	-6.96926	-5.39988	-9.24836	-7.29019	-7.44054	-13.1066	-6.91428	-7.46733	-13.0871	-8.28285	-7.76038	-4.40391	-4.65854	-6.41938	-5.49787	-7.75723	-6.46638	-3.91337	-3.43968	-6.71622	-4.95488	-5.66167	-6.67368	-6.11471	-5.93252	-5.1997
RVBD_3615c	espC	mod03	TRUE	TRUE	TRUE	TRUE	-3.1923	-2.59784	-3.28411	-3.01489	-3.88214	-2.40611	-1.33253	-2.94103	-2.58519	-3.06818	-1.53567	-0.598704	-4.10187	-2.18293	-2.7861	-2.7394	-6.77814	-4.01064	-2.55477	-3.89216	-3.02443	-3.62456	-6.30786	-2.50451	-4.35157	-4.16731	-3.0953	-3.35404	-2.40611	-3.12362	-3.72007	-1.8717	-2.77061	-1.9823	-2.86229	-2.96415	-1.91251	-3.97619	-4.60552	-4.63452	-4.05865	-4.23996	-3.53878
RVBD_3616c	espA	mod03	TRUE	TRUE	TRUE	TRUE	-2.63399	-2.56747	-3.87828	-2.12742	-3.05186	-2.83803	-2.69519	-2.74002	-1.72049	-1.73718	-2.13486	-1.20762	-4.54107	-2.28191	-5.55551	-4.56232	-4.35042	-2.5451	-2.31454	-4.44895	-2.34498	-3.06	-4.44266	-2.19334	-3.55488	-4.72198	-3.57671	-3.66217	-2.83803	-3.3944	-3.49887	-2.64863	-2.9973	-1.74994	-2.02867	-1.57227	-2.37574	-3.78397	-4.77344	-3.91201	-4.80688	-3.63022	-3.10992
RVBD_3869	eccB1	mod03	TRUE	TRUE	TRUE	TRUE	-3.35306	-2.86782	-3.81381	-2.80499	-3.18407	-2.40963	-2.19804	-2.41656	-2.0562	-2.53747	-1.75197	-0.919706	-4.37154	-1.95298	-3.67832	-6.28349	-5.0575	-3.04853	-3.20253	-5.10181	-3.45959	-3.70475	-6.17004	-3.52694	-4.95158	-4.00227	-3.48983	-3.5411	-2.40963	-2.66091	-3.41888	-2.44679	-2.96719	-2.80804	-2.01556	-2.67048	-2.47198	-3.80323	-5.3732	-4.40719	-4.82219	-3.72214	-3.72634
RVBD_3870	eccCa1	mod03	TRUE	TRUE	TRUE	TRUE	-3.30501	-3.00236	-4.03069	-2.78915	-2.74771	-2.56804	-2.0751	-2.99115	-1.40871	-2.58022	-1.66256	-0.828355	-4.72713	-2.61274	-2.20106	-4.63422	-5.123	-2.95333	-3.00477	-3.97965	-2.76499	-3.55392	-5.83338	-2.92403	-4.68691	-4.17797	-3.26051	-3.25278	-2.56804	-3.24222	-3.57127	-1.65013	-2.87534	-2.37971	-1.7908	-2.48976	-2.86976	-3.95639	-5.48233	-4.3353	-4.40935	-3.33941	-3.53013
RVBD_3871	eccCb1	mod03	TRUE	TRUE	TRUE	TRUE	-3.08854	-2.69193	-3.49627	-2.99488	-2.80482	-2.65016	-1.99805	-2.92585	-2.76452	-2.05899	-1.38401	-0.647809	-4.87121	-1.58567	-3.44753	-3.28739	-4.98948	-3.6167	-2.19007	-4.54331	-3.38982	-3.7795	-5.78621	-3.53227	-4.78357	-4.28592	-3.7003	-3.15972	-2.65016	-4.16962	-3.52247	-2.32402	-2.86244	-2.74572	-2.24679	-1.91144	-4.00572	-4.00511	-4.93039	-4.24754	-4.70414	-4.02947	-3.3038
RVBD_3873	PPE68	mod03	TRUE	TRUE	TRUE	TRUE	-1.66096	-2.25055	-2.35813	-1.26064	-1.49159	-1.61984	-1.60035	-2.57106	-1.61871	-1.73	-1.17021	-0.794872	-3.10126	-1.14763	-1.54288	-1.69292	-2.71023	-1.33776	-2.10144	-2.23678	-2.01017	-1.92345	-3.01583	-2.35746	-2.76847	-2.44036	-2.0811	-1.86568	-1.61984	-1.65713	-2.35136	-1.00017	-1.9507	-0.599141	-2.07791	-1.35533	-2.30529	-2.93409	-3.33448	-3.53052	-2.87493	-2.61437	-2.43417
RVBD_3876	espI	mod03	TRUE	TRUE	TRUE	TRUE	-2.40853	-1.54184	-2.01639	-2.09724	-1.37923	-1.79982	-1.43561	-1.6165	-1.63396	-1.26445	-1.09448	-0.645806	-2.84711	-1.27263	-1.74055	-1.99874	-2.48281	-1.62299	-1.85243	-2.23597	-1.99445	-1.63134	-2.31612	-1.62153	-2.76057	-2.86026	-1.91643	-1.54349	-1.79982	-2.18139	-2.27694	-1.43756	-1.89126	-1.51165	-1.20679	-1.71221	-2.25981	-2.24096	-2.58781	-2.23165	-2.23046	-2.36413	-2.12013
RVBD_3877	eccD1	mod03	TRUE	TRUE	TRUE	TRUE	-4.08446	-2.55868	-3.8777	-2.45085	-2.26737	-2.31099	-2.2736	-2.25394	-2.60594	-2.03849	-1.79902	-0.764466	-4.18155	-2.04958	-2.33371	-4.04011	-5.08085	-3.40606	-3.15057	-4.53832	-3.52951	-3.99769	-6.34797	-4.66051	-4.12623	-4.29756	-3.07341	-2.48209	-2.31099	-2.56808	-3.74586	-2.52992	-2.80735	-3.24463	-1.81842	-2.3945	-2.20575	-4.07733	-5.02622	-4.28358	-4.61016	-3.3933	-3.42551
RVBD_3882c	eccE1	mod03	TRUE	TRUE	TRUE	TRUE	-3.8474	-2.63809	-2.92829	-1.87721	-2.6758	-2.40842	-1.74346	-2.80156	-1.98714	-2.10195	-1.585	-0.853855	-4.23645	-1.72865	-2.72727	-2.99242	-4.51261	-2.68488	-3.07109	-3.7327	-2.69754	-3.51469	-6.77973	-2.34666	-4.39009	-4.08357	-3.48944	-3.56763	-2.40842	-3.10132	-4.43338	-2.34315	-2.96011	-1.79304	-2.07131	-2.5992	-2.38328	-3.83653	-4.60803	-5.04912	-4.83828	-3.27834	-3.48008
RVBD_3883c	mycP1	mod03	TRUE	TRUE	TRUE	TRUE	-3.85345	-2.47766	-3.08128	-2.19832	-3.15996	-2.57734	-2.14623	-2.47889	-1.64417	-1.84965	-1.92081	-0.916517	-5.04021	-1.53463	-2.29045	-5.31883	-4.9307	-2.39236	-3.0146	-4.3616	-2.81268	-3.50293	-8.00492	-4.97637	-4.02946	-4.29015	-3.36737	-2.99035	-2.57734	-3.20296	-3.45989	-2.04882	-2.84282	-1.44001	-2.51064	-2.80122	-2.58617	-4.06861	-4.42169	-4.23443	-4.83421	-3.56182	-3.53798
RVBD_0450c	mmpL4	mod04	TRUE	TRUE	TRUE	TRUE	-2.0345	-1.87997	-1.37023	-2.11679	-2.98441	-1.56347	-2.32223	-0.877288	-1.72525	-2.3819	-1.63614	-1.38984	-2.62131	-3.11912	-2.50249	-2.75354	-2.69856	-2.33311	-1.95811	-1.96593	-1.97314	-2.72915	-2.85841	-2.06521	-1.09237	-1.80424	-2.19107	-2.05258	-1.56347	-1.31085	-1.68764	-2.01503	-2.30895	-2.48455	-1.2317	-2.16258	-4.09395	-1.90754	-0.759098	-1.59537	-1.5749	-1.81616	-1.39471
RVBD_0180c	Rv0180c	mod05	F	F	F	F	-5.97326	-6.58336	-5.98064	-5.99026	-4.9721	1.7699	-5.97963	-5.98639	-5.98356	-4.98465	3.19272	3.68474	-0.484594	0.128706	-5.99471	-4.97755	-5.98601	-2.57275	-5.98691	-0.21302	-0.555726	-5.98399	-2.45715	-5.97045	-5.98045	-5.96366	-5.98341	-5.97507	1.7699	-0.340363	-5.98342	-4.97574	-5.98279	-4.97097	-0.108325	-5.99134	-5.98506	-1.15323	-5.97553	-5.98169	-5.98334	-5.98517	-5.98607
RVBD_0199	Rv0199	mod05	TRUE	TRUE	TRUE	TRUE	-1.70003	-1.86476	-1.08054	-0.842725	-2.60188	-1.68793	-1.14016	-2.97934	-1.22139	0.127106	-2.10824	-1.44016	-3.16007	-3.53172	-2.02899	-0.769602	-3.52893	-1.37731	-3.23927	-3.42049	-1.13439	-2.7347	-1.5708	-0.613232	-1.30576	-2.42308	-2.13253	-2.23757	-1.68793	-1.90419	-2.04615	-0.195996	-1.51326	-0.157253	-2.97612	-1.99957	-1.35763	-2.50913	-2.33553	-2.80318	-1.96965	-1.51684	-2.17063
RVBD_1348	irtA	mod05	TRUE	TRUE	TRUE	TRUE	-3.5909	-3.30405	-3.67612	-3.37741	-8.84563	-2.07067	-4.27328	-1.27462	-2.63021	-2.54388	-2.9891	-1.94668	-3.86915	-4.91101	-4.37359	-8.85638	-5.30672	-3.23496	-3.36121	-3.22901	-6.62585	-2.64487	-3.38579	-3.67934	-3.6057	-3.19235	-4.20563	-3.75952	-2.07067	-2.87781	-3.36528	-1.45972	-5.35135	-8.84692	-9.85092	-2.16747	-9.86516	-2.13005	-3.85437	-3.07883	-2.17568	-3.6928	-3.81771
RVBD_3131	Rv3131	mod05	TRUE	TRUE	TRUE	FALSE	-1.03515	-1.98014	-1.16741	-1.1876	-3.70545	-1.46027	-0.682896	-2.22559	-2.64577	-3.97793	-1.39798	-1.51538	-0.8685	-1.53814	-0.663491	-1.20453	-1.21756	-1.02459	-1.08287	-0.797531	-1.39933	-1.97697	-1.286	0.0569607	-0.581454	-4.47592	-1.73788	-1.0695	-1.46027	0.104361	-0.580165	-1.72309	-1.34092	-1.03515	-2.40302	-2.51311	-0.240906	-1.33213	-0.978493	-0.572363	-0.374842	-1.3569	-1.4448
RVBD_3568c	hsaC	mod05	TRUE	FALSE	TRUE	FALSE	-0.493028	-0.638816	-0.544441	-1.79573	-2.36821	-1.05801	-1.38764	-1.86126	-0.0798392	-0.209976	-1.76717	-1.14416	-1.03313	-2.59193	-0.580221	-3.76803	-1.17142	-0.84232	-1.75806	-1.38193	-1.41607	-2.0514	-0.964049	-1.10018	-0.479206	-1.01776	-1.1262	-1.44723	-1.05801	-2.54512	-1.67829	-0.571194	-0.668074	-0.0474943	-0.585875	-0.943318	0.0137999	-0.468363	-0.992235	-1.54645	-1.36532	-0.700208	-0.73674
RVBD_0242c	fabG4	mod06	TRUE	FALSE	FALSE	FALSE	-2.24902	-1.11574	-2.91857	-1.86606	-1.65683	-1.54476	-0.881658	-0.917114	-0.882152	-2.14855	-2.22025	-1.31318	-1.35851	-0.25955	0.138871	-1.75087	-1.09622	-2.06271	-1.15888	-0.47032	-0.310146	0.0485889	-0.535615	0.486374	-1.31195	-1.29191	-1.94032	0.227347	-1.54476	-0.614889	-0.642848	-0.737693	-0.829032	-1.94489	-1.43797	-2.95831	-2.35439	-2.33751	-1.49794	-1.21078	-1.87298	-2.48087	-2.42968
RVBD_0243	fadA2	mod06	TRUE	TRUE	FALSE	FALSE	-1.74977	-1.33465	-1.66474	-1.2653	-0.915544	-1.29454	-1.73665	-0.740667	-1.4556	-2.16266	-1.12563	-0.589251	-1.0204	0.401453	0.0463897	-2.09736	-0.227952	-0.564219	-0.791634	-0.443971	-0.736555	-0.736846	-0.276188	-0.936449	-0.211147	-0.512443	-1.17589	-0.841769	-1.29454	-0.860448	-0.162973	-0.0471499	-0.235693	0.046022	-1.09954	-1.11233	-0.342878	-0.672797	-0.894542	-0.827009	-1.04067	-1.33736	-1.19307
RVBD_0465c	Rv0465c	mod06	TRUE	TRUE	TRUE	TRUE	-1.93032	-1.36911	-2.09935	-1.84429	-2.18103	-0.673699	-1.46637	-1.05178	-1.9602	-0.638207	-1.36695	-0.619583	-0.626692	-0.508709	-0.259687	-1.51515	-1.67587	-0.699192	-1.21909	-1.11974	-1.96445	-1.31003	-0.959503	-0.99781	-1.29713	-1.40704	-1.06107	-0.669761	-0.673699	-0.206882	-0.51554	-0.547414	-0.494538	0.23049	-0.731311	-0.61109	-0.692567	-0.500237	-0.39756	-0.928035	-1.11529	-1.28545	-1.83233
RVBD_0642c	mmaA4	mod06	TRUE	FALSE	FALSE	FALSE	-1.99591	0.767913	0.269151	-1.12392	0.962137	-6.63192	4.48146	3.47801	4.02138	-5.63421	4.24345	4.81836	0.671368	-6.63616	-6.63736	-5.62224	0.0983601	-0.243887	1.0888	-6.623	-6.63542	-6.6304	-6.63203	-6.61352	-0.474232	-6.60881	-0.129628	0.778159	-6.63192	-5.6218	-0.897842	-5.61594	-2.80431	-5.61706	-6.61228	-6.63442	-6.63296	-1.06117	1.79653	-0.347827	0.735764	1.68245	-0.187217
RVBD_1568	bioA	mod06	TRUE	TRUE	TRUE	TRUE	-12.6345	-5.43142	-7.476	-12.6402	-4.8266	-3.69818	-2.63033	-3.67399	-2.47827	-4.32801	-1.5461	-1.18394	-5.80619	-9.11201	-12.6474	-11.6331	-7.3706	-5.05691	-9.33671	-12.6312	-9.40183	-12.6388	-12.6464	-12.6208	-12.6286	-12.6259	-12.6295	-6.3271	-3.69818	-4.19826	-12.6367	-11.6248	-8.81249	-11.6202	-12.6266	-12.6447	-7.93758	-6.32557	-7.81539	-9.37709	-9.35442	-7.02044	-6.94351
RVBD_1592c	Rv1592c	mod06	TRUE	TRUE	TRUE	TRUE	-2.74012	-1.98556	-2.05926	-2.09675	-2.857	-0.812776	-2.35514	-0.860344	-1.91402	-4.18393	-0.918767	-0.124292	-1.8447	-1.6035	-1.25152	-4.95419	-1.82593	-3.08633	-1.59873	-0.94257	-1.16498	-1.19804	-0.598357	-2.07323	-1.64277	-2.14981	-1.42268	-0.722684	-0.812776	0.511577	-0.0455304	-1.00835	-0.444407	-0.455127	-1.45261	-1.94731	-2.75501	-1.00163	-1.3872	-0.864723	-1.82925	-2.15336	-2.40809
RVBD_1925	fadD31	mod06	TRUE	FALSE	TRUE	FALSE	0.44038	0.212302	0.601454	-0.386031	-0.858022	-0.052764	0.467121	-0.351767	1.85835	-1.25465	0.794339	0.628049	-1.35732	-1.81525	-0.427736	-0.120338	-0.54145	-0.728466	0.13638	0.891781	-0.0076466	-0.328423	-0.593473	0.246369	0.20918	0.639466	-0.523193	-0.885153	-0.052764	-0.118632	-0.306518	-0.354106	-0.604642	-0.880831	0.352264	-0.675366	-0.249008	-0.163789	0.26769	0.411333	0.308734	0.189554	0.0830882
RVBD_2563	Rv2563	mod06	TRUE	TRUE	FALSE	FALSE	-4.64326	-3.07726	-2.46213	-2.46909	-4.58134	-1.19411	-3.90739	-0.399039	-1.91438	-3.51373	-2.25473	-0.871692	-1.19015	-1.58561	-2.21713	-5.55148	-4.32482	-2.79549	-2.84432	-0.153655	-0.748497	-1.50518	-1.9723	-1.12952	-0.860585	-2.02749	-1.03607	-0.677313	-1.19411	0.999601	0.137837	-0.709162	-0.537167	0.863822	0.0991909	-2.97879	-1.155	0.570945	0.149042	-0.517721	-2.1249	-1.19405	-2.53814
RVBD_2564	glnQ	mod06	TRUE	TRUE	FALSE	FALSE	-2.91721	-2.6623	-2.4833	-2.05039	-4.19303	-0.21988	-2.47202	-0.0222971	-3.11453	-10.4248	-1.56843	-0.157667	-1.28234	-1.6853	-2.99791	-6.14411	-3.82449	-2.7645	-2.34027	-0.249188	-0.671303	-1.2792	-0.995706	-2.77984	-1.23378	-2.0757	-0.78228	-0.375673	-0.21988	1.43385	-0.128011	-1.08085	-0.236155	0.335427	-0.410648	-2.18196	-1.95123	0.847902	0.216427	-0.300307	-1.48239	-0.587119	-1.99655
RVBD_2583c	relA	mod06	TRUE	TRUE	TRUE	TRUE	-3.50973	-1.94417	-1.95915	-2.10582	-3.52407	-3.15564	-2.46334	-2.25368	-2.05546	-3.85784	-3.21946	-3.42206	-2.72413	-2.73251	-5.48447	-7.44034	-3.23311	-3.90892	-2.06495	-0.982795	-1.96326	-1.90042	-2.00575	-2.67076	-1.96883	-2.15148	-2.5333	-2.37172	-3.15564	-3.01426	-2.56639	-2.14874	-2.54079	-2.8313	-2.55219	-2.61013	-2.60472	-2.93623	-3.28725	-2.62698	-3.53932	-1.44213	-2.56437
RVBD_1621c	cydD	mod07	FALSE	FALSE	FALSE	FALSE	NA	NA	7.5441	NA	NA	NA	7.42032	9.60935	NA	NA	12.1554	11.6577	5.04458	NA	NA	NA	NA	NA	NA	NA	NA	5.43146	NA	NA	NA	NA	NA	NA	NA	NA	NA	NA	4.84959	NA	NA	NA	NA	NA	6.79697	4.84165	NA	6.3084	5.36852
RVBD_1622c	cydB	mod07	FALSE	FALSE	FALSE	FALSE	NA	NA	NA	NA	NA	NA	5.88503	NA	NA	NA	12.0111	11.0025	NA	NA	NA	NA	5.58531	NA	4.88891	NA	NA	NA	5.11303	NA	NA	NA	NA	NA	NA	NA	NA	NA	NA	8.19757	NA	NA	NA	NA	5.83162	NA	NA	4.82396	3.98789
RVBD_1782	eccB5	mod07	FALSE	FALSE	FALSE	FALSE	NA	NA	5.78186	NA	NA	NA	NA	NA	NA	NA	12.9878	12.7472	NA	5.11228	NA	NA	NA	NA	NA	NA	NA	NA	NA	NA	NA	NA	NA	NA	NA	NA	NA	NA	5.40723	NA	NA	NA	NA	NA	NA	NA	NA	6.74341	6.53125
RVBD_1794	Rv1794	mod07	FALSE	FALSE	FALSE	FALSE	-2.19951	-2.82448	-2.20808	-2.2299	-1.21476	2.02662	-2.21989	-2.21437	-2.22283	-1.21408	9.54427	9.48179	-2.23747	-2.23149	-2.23098	-1.20736	-2.21362	-2.21666	-2.2201	-2.20035	-2.21227	-2.21232	-2.2216	-2.2088	-2.22133	-2.19118	-2.21519	-2.20046	2.02662	-1.2099	-2.22066	-1.21223	-2.21968	-1.21257	-2.20706	-2.22978	-2.21619	-2.2126	-2.21026	-2.21165	-2.20598	5.42423	3.24059
RVBD_1795	eccD5	mod07	FALSE	FALSE	FALSE	FALSE	NA	NA	NA	NA	NA	8.17852	NA	7.7763	NA	NA	13.7556	14.1005	NA	NA	NA	NA	NA	NA	NA	NA	NA	NA	NA	NA	NA	NA	NA	NA	8.17852	5.98196	NA	NA	NA	NA	NA	NA	NA	NA	NA	NA	NA	7.02751	6.88538
RVBD_1796	mycP5	mod07	FALSE	FALSE	FALSE	FALSE	3.25292	2.07061	-2.6256	-2.62584	-1.60471	-2.61573	-2.6144	3.56305	6.2414	-1.61984	10.0059	10.236	-2.63251	1.84531	-2.63255	2.65325	-2.62516	0.783111	0.715392	-2.62217	0.606497	2.39765	2.2785	-2.60521	3.20039	3.29177	-2.62337	-2.62022	-2.61573	-1.61534	-2.62222	-1.61641	-2.61799	-1.59447	4.05994	1.71113	-2.6227	-2.60664	-2.60746	-2.61492	-2.63109	3.58667	3.4836
RVBD_1797	eccE5	mod07	FALSE	FALSE	FALSE	FALSE	NA	NA	6.74198	NA	NA	NA	NA	NA	NA	NA	12.3342	11.9987	NA	NA	NA	6.8588	NA	NA	NA	NA	NA	NA	NA	NA	5.49902	NA	NA	NA	NA	NA	NA	NA	NA	NA	NA	NA	NA	NA	NA	NA	NA	5.74546	4.84461
RVBD_0066c	icd2	mod08	FALSE	FALSE	FALSE	FALSE	-1.68446	1.60189	-1.70071	1.89367	-0.680063	-1.69024	3.56318	-1.70229	-1.68336	-0.690492	5.22979	5.16934	2.3037	-1.69247	-1.70841	-0.692565	-1.69283	-1.7114	-1.6968	-1.69225	-1.69453	-1.68802	-1.70289	-1.67827	-1.67646	-1.68556	-1.69436	-1.70026	-1.69024	-0.683408	-1.70741	-0.689009	-1.69224	-0.664287	-1.68174	-1.71091	-1.69744	-1.68759	-1.68454	-1.6829	-1.69085	2.56867	-1.70481
RVBD_0989c	grcC2	mod08	FALSE	FALSE	FALSE	FALSE	1.62161	1.50359	-0.290341	-1.24515	1.29502	0.618732	3.06754	0.740088	2.63183	4.03964	3.05367	3.24813	4.07703	3.23092	2.83771	3.84127	4.0505	3.01497	1.21909	1.02978	1.81399	0.762701	1.57583	0.943026	1.09211	-2.02666	0.366053	0.711877	0.618732	-2.86579	1.21553	0.243534	0.58548	2.46518	-0.596632	-1.17176	-1.02588	0.742533	1.03604	0.593228	0.799594	1.36231	0.570726
RVBD_0248c	Rv0248c	mod10	TRUE	TRUE	TRUE	TRUE	-0.898235	-2.12998	-2.26975	-1.87895	-2.49528	-1.36664	-3.01935	-1.38077	-3.48381	-1.39717	-1.41279	-0.552857	-1.73384	-2.42184	-1.51283	-0.75114	-2.03758	-1.12273	-1.98088	-1.6622	-2.96053	-2.16549	-1.11239	-1.9653	-2.15887	-2.2692	-1.89002	-1.16986	-1.36664	-1.23708	-2.09129	-0.913107	-2.04476	-2.86116	-0.897666	-1.00178	-1.2264	-0.609089	-0.669464	-1.26207	-1.74669	-1.79602	-3.01414
RVBD_0249c	Rv0249c	mod10	TRUE	TRUE	TRUE	TRUE	-0.743849	-3.66592	-2.51994	-1.70418	-3.15831	-1.53778	-2.79314	-0.0752475	-0.944549	-0.908424	-2.12533	-1.19249	-1.90496	-3.72641	-1.6508	-1.1186	-2.512	-0.713095	-2.24169	-1.8344	-1.67398	-2.56696	-2.46815	-2.30542	-0.93205	-2.92321	-1.6858	-0.921346	-1.53778	-1.06069	-1.45365	-2.06637	-1.82945	-0.225136	-1.07523	-1.59042	-3.23812	-0.60924	-1.37067	-1.14395	-1.58632	-2.22961	-3.22313
RVBD_0757	phoP	mod10	TRUE	TRUE	TRUE	TRUE	-12.389	-4.77925	-5.20631	-4.55841	-11.3752	-3.89018	-7.09948	-3.62036	-3.88859	-2.34959	-3.98637	-2.31629	-4.42389	-4.88971	-3.3092	-6.15232	-6.28384	-5.60779	-6.41189	-4.97608	-7.67399	-5.04735	-6.52041	-5.11242	-6.76592	-12.3742	-5.83016	-4.49225	-3.89018	-3.63097	-3.826	-2.6794	-3.53701	-1.79377	-2.25596	-3.71961	-1.69442	-4.14558	-5.30002	-3.84369	-5.80353	-5.3517	-7.883
RVBD_0758	phoR	mod10	TRUE	TRUE	TRUE	TRUE	-4.57793	-2.1994	-2.71774	-2.06523	-3.18557	-2.26455	-4.17719	-2.20906	-2.63556	-0.441551	-2.17002	-1.64397	-3.71017	-3.46155	-1.96789	-2.33089	-4.19223	-3.67582	-2.72446	-2.82036	-3.88394	-2.70926	-4.22895	-2.11964	-3.68437	-3.0021	-2.52354	-2.2119	-2.26455	-1.97722	-1.66938	-0.590194	-1.37173	-1.42289	-1.16905	-1.81689	-0.633946	-2.01656	-3.10924	-2.50074	-3.9954	-3.66864	-5.11545
RVBD_1623c	cydA	mod10	FALSE	FALSE	FALSE	FALSE	0.923545	-0.396097	0.0338192	-1.71796	-0.778589	-1.5401	0.164373	-0.211839	-3.77255	-6.90676	3.749	3.36546	-0.830226	1.39048	-7.91754	-6.9013	-7.90664	-1.30391	0.468866	-0.274839	1.32257	-0.641628	0.0640552	0.787756	1.44627	0.695012	0.601432	-0.338746	-1.5401	-3.50206	-0.620164	-2.96364	-1.95204	1.3449	-0.583241	1.00148	-7.90853	0.304831	-0.166341	-0.729176	-0.578077	0.105621	0.335197
RVBD_0244c	fadE5	mod11	TRUE	TRUE	FALSE	FALSE	-1.41559	-2.47478	-2.91111	-4.07166	-3.63822	-0.419706	-1.56621	-1.06586	-0.962871	-8.89297	-1.7143	-1.0451	-3.01166	-2.46326	-1.45558	-8.88199	-4.36765	-3.86127	-0.813015	-0.700928	-1.63599	-1.09273	-0.797813	-2.60951	-2.39878	-4.94248	-2.26293	-1.76413	-0.419706	-0.213102	-0.433371	-1.61369	-1.1901	-3.26334	-1.7105	-1.65666	-1.42049	-0.126244	0.110583	0.712363	0.817928	-0.280416	-0.0887841
RVBD_0643c	mmaA3	mod11	TRUE	FALSE	FALSE	FALSE	0.0579743	-0.115711	-0.00283139	0.0473772	-2.79885	0.918517	0.115526	-0.483566	0.264235	-1.42638	0.702948	0.958519	0.00603817	0.428185	0.45139	-0.378506	-0.686714	-0.000822705	0.6614	-0.102669	-0.61666	-0.518337	-0.639767	-0.369574	0.511273	0.010654	0.57537	0.1689	0.918517	0.789485	0.316961	0.00673273	0.560325	0.336683	0.0867108	-1.17201	-0.788012	0.923139	0.5207	1.00273	0.952118	1.0739	0.591221
RVBD_1538c	ansA	mod11	TRUE	TRUE	TRUE	TRUE	-0.645042	-1.35531	-0.959485	-1.56866	-0.57929	-0.773899	-1.03153	-0.962594	-0.98587	-1.44437	-1.22615	-0.858117	-1.06592	-1.13957	-1.90476	-1.49042	-2.98155	-0.879702	-0.738635	-0.267556	-1.03074	-1.05612	-0.836992	-0.737365	-0.960442	-1.27809	-0.928428	-0.798979	-0.773899	-0.257619	-0.520467	-1.09933	-0.728616	-2.08821	-1.47384	-1.37632	-1.07917	-0.519034	-0.19356	-0.554338	-0.715089	-0.282413	-0.88867
RVBD_2224c	caeA	mod11	TRUE	TRUE	TRUE	TRUE	-4.16362	-2.50189	-3.23812	-3.73225	-3.73565	-3.52532	-0.882067	-2.24542	-2.53987	-4.59093	-1.22213	-1.66934	-1.23114	-0.8309	-2.66258	-2.20099	-3.51574	-2.4295	-3.23309	-3.35307	-1.93216	-2.59073	-4.81288	-2.36171	-2.05199	-2.03083	-2.81867	-2.27241	-3.52532	-4.10837	-2.5258	-2.80217	-1.96325	-2.55074	-1.03796	-3.68438	-1.48385	-4.48745	-4.90803	-2.55479	-3.1487	-3.69044	-3.09412
RVBD_2967c	pca	mod11	TRUE	TRUE	TRUE	TRUE	-2.29465	-2.8163	-2.38383	-2.73592	-2.92524	-2.3563	-0.386523	-1.3469	-1.24815	-2.88328	-1.62595	-1.6881	-4.14794	-7.72207	-2.80071	-10.1446	-6.19232	-3.28238	-2.30455	-1.42757	-3.20018	-2.75031	-1.85887	-2.23157	-4.26269	-1.96233	-2.24925	-2.36814	-2.3563	-0.830487	-1.47595	-2.20511	-2.03893	-3.14124	-11.1392	-2.28342	-5.65671	-1.44329	-0.837552	-0.966312	-1.53833	-1.28235	-2.06182
RVBD_0924c	mntH	mod12	FALSE	FALSE	FALSE	FALSE	0.651658	0.342042	1.29337	1.07717	0.660153	0.117973	1.40537	0.83104	0.675354	1.10406	1.17792	1.23109	1.15987	0.906096	0.367248	1.4879	1.39054	0.353554	0.490722	0.74576	0.896896	0.232734	0.582679	0.799322	0.447491	1.68772	0.295672	-0.19396	0.117973	-0.139236	0.332849	0.0868422	0.644691	0.16146	0.741371	0.560132	0.699541	0.240028	0.380509	-0.0281813	0.468367	0.60578	0.688523
RVBD_1193	fadD36	mod12	TRUE	TRUE	TRUE	TRUE	-4.65553	-3.31183	-4.27847	-2.49856	-9.38046	-1.93998	-3.39502	-4.20821	-6.26117	-3.0775	-1.65944	-0.712919	-5.47111	-4.06913	-2.37836	-2.67851	-6.39645	-10.3991	-3.4709	-4.62302	-3.3111	-2.46987	-3.9388	-3.11644	-2.75083	-2.0765	-2.06711	-0.664485	-1.93998	-2.31558	-3.00403	-1.54007	-1.36587	-1.14836	-4.52076	-2.5769	-1.20612	-1.19227	-1.30663	-3.51612	-1.96398	-2.94254	-2.98241
RVBD_1784	-	mod12	FALSE	FALSE	FALSE	FALSE	-1.68446	-2.28379	2.21752	-1.69223	-0.680063	2.55457	-1.69979	-1.70229	-1.68336	-0.690492	10.9563	10.7707	0.895623	-1.69247	-1.70841	-0.692565	-1.69283	-1.7114	-1.6968	5.01255	-1.69453	-1.68802	2.56866	-1.67827	-1.67646	-1.68556	-1.69436	-1.70026	2.55457	-0.683408	-1.70741	-0.689009	-1.69224	-0.664287	-1.68174	2.76024	-1.69744	-1.68759	-1.68454	2.87934	2.20746	5.96253	4.49353
RVBD_2989	Rv2989	mod12	TRUE	TRUE	TRUE	TRUE	-3.10695	-4.85647	-2.93401	-4.60074	-4.73534	-2.28517	-3.54119	-5.52552	-3.35061	-2.72218	-2.44007	-1.88302	-4.15335	-3.80041	-2.42033	-5.7078	-10.9875	-3.75689	-3.05444	-1.56813	-2.10012	-2.26071	-1.71044	-4.8043	-2.18223	-3.10974	-2.79758	-1.7392	-2.28517	-2.36105	-1.44454	-0.768368	-2.25973	-9.9695	-2.73253	-4.23794	-1.89383	-2.43572	-2.60885	-1.86304	-1.68807	-2.61015	-4.11163
RVBD_2091c	Rv2091c	mod13	TRUE	TRUE	TRUE	TRUE	-5.30436	-2.52349	-3.10453	-2.56874	-1.85988	-2.71948	-1.84421	-1.44895	-2.61682	-11.5736	-1.46963	-1.30652	-3.28636	-2.40908	-1.74517	-5.03613	-3.39727	-4.35558	-1.40497	-3.17301	-1.86403	-2.05484	-1.52467	-1.83787	-2.33213	-1.34932	-2.95887	-2.34674	-2.71948	-3.35399	-1.85548	-2.31888	-1.05584	-0.644882	-2.75445	-2.68226	-3.98187	-3.63799	-5.09851	-3.15831	-4.7042	-3.54954	-4.69589
RVBD_0820	phoT	mod14	F	F	F	F	-1.05809	0.319232	1.45192	-0.483086	1.33176	2.87985	1.84686	1.66929	5.34622	2.94348	3.51794	3.26195	1.45423	0.318004	1.26505	1.98719	2.25908	2.58972	1.40655	0.828556	0.767644	1.0639	0.949936	1.01354	1.31028	0.887249	1.53713	1.57339	2.87985	0.343695	0.943108	-0.149345	-0.345712	1.65394	0.601432	1.05463	-3.72546	2.25016	2.56291	2.78596	3.18149	3.15684	2.46357
RVBD_0928	pstS3	mod14	TRUE	FALSE	FALSE	FALSE	-0.837687	1.19095	0.892549	-5.96468	0.0252422	1.39443	1.8898	1.5641	5.07054	0.868519	3.29778	2.91471	0.579652	-2.19512	-0.210756	1.85843	1.22263	1.54417	1.46339	1.28811	0.535349	-0.175099	0.0445083	0.358688	0.30908	-0.184453	0.650125	-0.488537	1.39443	0.414784	-0.278443	-0.752472	-0.54595	0.0302675	0.556975	-0.288742	-1.33246	0.887543	1.74978	1.22069	2.95296	2.50341	1.50575
RVBD_0929	pstC2	mod14	TRUE	FALSE	TRUE	FALSE	-1.95699	0.999313	0.669926	-0.148436	0.479764	1.47517	2.50629	1.81691	5.19773	2.48877	3.61349	3.22792	0.621517	-0.167816	-2.37595	-7.13604	-3.58818	-1.53629	0.654719	0.532918	-0.841438	-3.11982	1.57622	1.0366	-3.74246	-0.748205	-0.151104	-0.14827	1.47517	-1.2726	-0.407962	-1.84195	-1.25136	0.460962	-1.47234	-3.80904	-8.14573	1.12919	2.07383	2.90846	4.81471	2.93147	0.619866
RVBD_0930	pstA1	mod14	TRUE	FALSE	FALSE	FALSE	-1.9617	1.16881	1.97438	0.357024	0.992559	2.92416	2.87644	2.05123	4.98407	3.39853	4.17795	4.14045	0.746935	-0.757411	-2.26382	1.15232	1.88188	3.41097	1.59149	1.45151	0.69248	1.20268	0.688704	-0.49795	0.113619	-0.081685	1.77874	0.238894	2.92416	-0.00813495	0.10203	-0.097459	0.509315	-0.189797	1.89192	1.83383	1.46518	1.6514	2.11458	2.48123	2.33981	3.31392	2.38172
RVBD_2222c	glnA2	mod14	F	F	F	F	-0.718618	-0.9316	-0.116488	-1.76779	-0.591074	-0.887848	-0.696861	1.68563	-0.823348	1.8477	1.47237	1.5081	-0.514912	-0.789288	0.535039	0.126688	0.262276	0.601572	-0.319986	-0.785051	-0.522842	-1.24352	0.303711	-0.293379	-0.339011	-1.43325	-0.722875	-0.80909	-0.887848	-1.03388	-0.0595153	-0.142345	-1.07359	0.0356147	-1.037	0.276334	-0.642688	1.08555	1.26414	0.388913	1.11522	0.525273	0.280524
RVBD_2606c	snzP	mod14	TRUE	TRUE	TRUE	TRUE	-10.7098	-11.3023	-10.7068	-10.7119	-9.69404	-2.79005	-1.51982	-3.85489	-10.6968	-9.71428	-2.62414	-1.88989	-4.69788	-10.7141	-10.721	-9.70652	-10.7117	-10.7164	-10.7156	-10.7047	-7.47582	-10.7128	-10.7207	-10.6948	-10.7026	-10.699	-10.7033	-7.4247	-2.79005	-3.62141	-10.7112	-9.69753	-10.7088	-9.69594	-10.7008	-10.7182	-10.7155	-10.7013	-10.7028	-6.10187	-6.80454	-2.76765	-10.7177
RVBD_1836c	Rv1836c	mod15	TRUE	FALSE	TRUE	FALSE	-1.3593	-1.08202	-1.62316	-0.735823	-6.20579	0.579213	1.92346	-1.76667	2.97157	-6.23367	2.25168	2.16963	1.74525	1.03382	-0.508671	2.88363	-0.213525	0.994302	-2.19101	-1.05099	-3.06986	-2.97758	-7.22806	-7.21116	1.33451	-7.20675	0.524921	1.02261	0.579213	-1.11594	-0.590384	-6.21275	-7.22393	-0.603787	-7.21034	-3.69537	-7.23095	-2.6004	-0.457433	-1.43804	-3.01524	-1.64155	-3.03965
RVBD_3868	eccA1	mod15	TRUE	TRUE	TRUE	TRUE	-2.63539	-3.04962	-3.35813	-2.77605	-1.86878	-3.16344	-1.48556	-1.74761	-0.603609	-3.01764	-2.70282	-2.14871	-3.17086	-3.39004	-1.83631	-1.14483	-2.48133	-3.13914	-4.22775	-3.05808	-2.37947	-2.26119	-2.91294	-2.28674	-2.22296	-3.156	-2.92608	-3.35935	-3.16344	-3.07973	-2.67987	-3.53776	-3.24903	-0.49883	-3.83611	-3.65539	-1.56207	-2.94345	-2.30306	-2.39415	-3.00572	-3.20721	-2.64514
RVBD_0202c	mmpL11	mod16	TRUE	TRUE	TRUE	TRUE	-1.38414	-1.87631	-1.28334	-1.11034	-1.81395	-1.19704	-0.897085	-1.00935	-1.14962	-1.65295	-0.843084	-0.572667	-1.5926	-1.39526	-2.20054	-1.42022	-1.01247	-1.7753	-1.44628	-1.79977	-1.4392	-2.25967	-2.27654	-1.46752	-1.30542	-1.17542	-1.25224	-1.44936	-1.19704	-1.24234	-1.4614	-0.935703	-1.90841	-1.89824	-0.747148	-2.13392	-1.91287	-1.70046	-1.39663	-1.44326	-1.50189	-1.18038	-0.991433
RVBD_2047c	Rv2047c	mod16	TRUE	TRUE	TRUE	TRUE	-2.15014	-2.927	-1.36113	-1.71013	-2.79542	-1.63029	-1.5008	-1.84444	-2.36478	-1.25646	-1.11103	-1.35577	-2.51501	-2.35223	-1.00607	-1.09646	-1.38627	-0.757425	-2.21812	-2.05499	-1.44856	-2.6709	-2.23481	-0.614717	-1.57924	-1.77642	-1.94365	-2.41255	-1.63029	-2.20533	-1.52255	-1.65626	-1.83915	-1.17925	-1.5869	-1.84708	-3.33432	-1.45753	-1.43344	-2.03812	-1.83926	-2.11038	-1.60212
RVBD_2048c	pks12	mod16	TRUE	TRUE	TRUE	TRUE	-1.60537	-1.88431	-1.07868	-1.87296	-1.28979	-1.5457	-0.928986	-1.398	-1.50018	-1.24833	-0.972095	-0.875327	-1.88397	-1.76456	-1.84202	-0.809146	-1.4299	-0.650899	-1.40444	-1.12335	-1.02214	-2.27008	-1.6424	-2.08881	-1.42019	-1.21038	-1.45959	-1.43303	-1.5457	-1.45739	-1.41551	-1.68698	-2.0754	-1.16843	-1.57065	-1.73022	-2.06485	-1.93625	-1.25706	-1.42387	-1.51837	-1.05244	-1.40353
RVBD_3496c	mce4D	mod16	TRUE	TRUE	TRUE	TRUE	-1.16042	-1.76425	-1.04456	-0.570229	-1.09518	-1.51342	-0.726173	-1.47816	-0.636935	-0.568423	-0.85755	-0.752376	-1.71014	-2.5711	-0.51913	-1.25361	-1.24718	-1.0906	-2.0139	-1.31468	-1.33114	-1.72108	-1.55482	-1.55421	-1.22111	-1.24429	-1.1378	-1.23018	-1.51342	-1.58059	-1.25704	-1.40712	-1.39405	-1.09895	-1.39823	-1.62524	-0.920157	-1.69488	-1.4369	-1.47504	-1.79714	-1.46787	-1.44353
RVBD_3544c	fadE28	mod17	TRUE	TRUE	TRUE	TRUE	-4.62698	-3.77194	-4.88413	-3.7434	-3.22007	-5.04588	-1.89756	-3.21626	-2.70747	-4.27127	-1.40398	-1.22094	-5.95862	-4.28573	-1.35596	-6.31097	-5.3301	-5.67334	-11.5932	-4.70408	-5.57075	-5.6013	-3.40758	-5.40414	-3.77947	-3.30362	-3.73918	-4.97678	-5.04588	-6.2554	-4.44025	-4.83561	-3.05578	-1.04363	-2.63205	-2.64961	-3.67368	-5.6451	-6.54794	-11.585	-5.93706	-5.55315	-4.8942
RVBD_0270	fadD2	mod18	TRUE	TRUE	TRUE	FALSE	-0.191105	-0.690068	-0.62074	-0.667976	-0.298231	-0.0355544	-0.860592	-0.467039	-0.475437	-0.152313	-0.819208	-0.754262	-0.863409	-1.35903	-1.20057	-0.64274	-0.345539	-0.146354	-0.523481	-0.103042	-0.67539	-0.239488	-0.215575	-0.4119	-0.337258	-0.306401	-0.563031	-0.793816	-0.0355544	-1.4093	-0.695757	-0.348478	-1.01547	-0.509153	-0.125255	-0.362431	0.0875246	-0.669429	-0.119545	0.0351118	0.424205	-0.448516	-0.147083
RVBD_1183	mmpL10	mod19	TRUE	TRUE	TRUE	TRUE	-0.201849	-0.862515	-0.58781	-1.0877	-0.531362	-1.7915	0.0141959	-1.02258	-0.885481	-1.23658	-1.26757	-1.30939	0.0471742	-1.30626	-1.15795	-1.06442	-1.03685	-0.31421	-1.08866	-0.652754	-0.853669	-1.10659	-1.24565	-1.32073	-0.145577	-0.177789	-0.747175	-0.707795	-1.7915	-1.03213	-1.64056	-1.13294	-1.02818	-0.549913	-0.66016	-0.943333	-1.14557	-0.788045	-0.624369	-0.993357	-1.26394	-1.22545	-0.941285
RVBD_1819c	bacA	mod19	TRUE	TRUE	TRUE	TRUE	-0.890901	-0.594839	-0.293525	-0.356355	-0.425362	-0.740001	-0.412282	-0.472694	-0.43481	-1.95756	-0.862653	-0.439263	-0.391268	-0.519382	-0.132492	-0.731263	-0.164272	-0.414765	-0.70394	-0.719537	-0.547688	-0.429808	-0.409132	-0.511864	-0.40082	-0.385349	-0.545341	-0.671724	-0.740001	-0.59912	-0.897951	-0.453915	-0.704456	-0.482667	-0.335935	-0.199235	-0.885735	-0.526865	-0.836089	-0.586708	-0.896132	-0.639189	-0.695351
RVBD_0806c	cpsY	mod20	TRUE	TRUE	TRUE	TRUE	-1.60806	-1.22074	-1.84256	-0.585395	-0.840433	-2.82121	-1.00433	-0.194103	-0.894584	-3.98153	-1.05053	-0.740463	-0.274525	-0.312592	-0.273247	-3.27196	-0.919622	-0.917034	-1.28957	-1.05211	-0.666011	-0.694643	-0.398056	-0.663863	-0.63843	-1.04039	-2.68114	-2.33988	-2.82121	-2.36543	-2.4749	-2.0923	-0.936428	-0.97581	-0.98298	-1.3994	-1.70842	-2.56131	-3.28756	-1.79488	-2.56713	-1.95992	-2.53545
RVBD_2334	cysK1	mod20	FALSE	FALSE	FALSE	FALSE	4.60179	4.65623	4.74327	-2.98451	3.27951	6.84545	2.3289	3.20387	-2.97195	-1.99099	4.16341	5.21212	3.21679	2.89682	3.18297	3.24784	2.29966	5.86434	2.67126	1.80994	4.93129	4.23245	4.00882	-2.97484	4.62583	4.54596	5.5621	5.85959	6.84545	3.62046	4.51508	-1.98218	3.96172	3.6416	2.87892	3.50976	4.59	5.41222	5.95523	5.19431	5.26513	5.25231	4.86049
RVBD_2640c	Rv2640c	mod20	TRUE	TRUE	FALSE	TRUE	-3.89768	-2.28501	-1.53403	-3.6735	-0.660151	-0.683954	-3.2536	-2.78407	-3.68931	0.258692	-1.77861	-0.788314	-1.88993	-3.39102	-1.82912	-1.32623	-3.54261	-1.85812	-2.17041	-1.13049	-1.79738	-2.12133	-2.57932	-2.69119	-1.41906	-2.06391	-0.555553	-1.01351	-0.683954	-0.885323	-1.31905	-1.51476	-1.25571	-1.09039	-2.25783	-2.32726	-1.14846	-1.04489	-0.161699	-0.558788	-0.493762	-1.74124	-1.26365
RVBD_3139	fadE24	mod20	TRUE	FALSE	TRUE	FALSE	-1.41528	-0.810787	-1.72344	-2.78054	-1.34972	-0.827501	-0.539459	-0.86975	-1.40149	0.547985	-1.48308	-0.579438	-0.905716	-1.31295	-0.777606	-0.00695525	-0.408486	-0.61934	-0.938544	-0.977641	-1.20423	-0.780356	-0.639274	-1.0705	-0.585496	-1.23305	-0.521858	-0.178956	-0.827501	-0.0639798	-0.523961	-1.06574	-0.120228	-0.00142978	-0.35577	-0.11891	-0.14036	-0.608059	-1.27293	-0.603654	-0.462212	-0.898603	-0.538215
RVBD_0092	ctpA	-	TRUE	TRUE	FALSE	FALSE	-1.0186	-0.819796	-0.45344	-0.690818	-0.0297266	-0.681131	-0.953949	-0.617678	-0.466901	-0.98484	-0.86411	-0.936669	-0.763883	-0.594396	-0.252744	-0.802738	-0.706522	-0.726633	-0.704525	-0.650707	-0.336024	-0.633352	-0.718446	-0.90153	-0.854253	-1.34789	-0.358499	-0.39102	-0.681131	-0.334105	-0.817852	-0.634704	-0.911185	-0.541772	-0.527562	-0.439243	-0.642661	-0.646538	-0.433184	-0.381032	-0.581514	-0.436946	-0.370226
RVBD_0655	mkl	-	TRUE	TRUE	TRUE	TRUE	-2.28963	-1.62386	-2.56865	-0.796748	-1.19533	-2.00779	-0.94591	-2.11255	-0.804572	-1.32296	-1.72125	-1.48388	-2.58946	-3.13686	-1.32809	-2.67123	-2.95707	-1.73442	-2.25457	-2.25293	-1.51437	-2.18579	-1.65409	-1.77911	-2.19981	-1.68227	-2.48019	-2.56489	-2.00779	-2.02601	-2.0831	-0.437949	-2.1303	-1.14886	-0.219787	-1.26804	-3.87906	-2.0661	-2.64708	-2.42745	-2.8501	-2.27239	-2.31747
RVBD_0796	Rv0796	-	FALSE	FALSE	FALSE	FALSE	0.505423	0.533873	0.658343	0.475353	0.65841	0.663536	0.586178	0.53706	-0.0236086	-0.324176	0.742219	0.63945	0.404886	0.398841	0.437562	0.46585	0.488342	0.362266	0.653786	0.221379	0.385079	0.520982	0.109784	0.444337	0.669107	0.614846	0.622188	0.815987	0.663536	0.671907	0.750159	0.70577	0.638507	0.500705	0.486767	0.636915	0.736609	0.541432	0.727115	0.608466	0.660211	0.563876	0.523366
RVBD_1071c	echA9	-	TRUE	FALSE	TRUE	FALSE	-0.420619	-0.279328	-0.784652	-0.203151	-0.38434	-0.216718	-0.712917	-0.556307	-0.570514	-0.319144	-1.02268	-0.638155	0.127333	-0.461995	0.0706671	0.0747231	-0.159232	-0.628841	-0.556898	-0.457789	-0.484723	-0.418862	-0.428599	0.00637397	-0.0915113	-0.381707	-0.316375	-0.0820057	-0.216718	-0.123131	-0.464724	-0.111243	-0.100574	-0.246556	-0.362776	-0.58383	-0.312714	-0.0814238	-0.329261	-0.474746	-0.422241	-0.381341	-0.709501
RVBD_1184c	Rv1184c	-	TRUE	FALSE	TRUE	FALSE	-0.420438	-0.477701	-0.300718	-0.632254	0.211859	-0.904581	-0.654846	-0.828627	-0.327427	-0.909417	-1.19452	-0.84707	-0.118452	-0.764001	-0.344568	-0.46032	-0.518444	-0.360346	-0.518323	-0.734806	-0.597309	-0.754946	-0.714651	-0.464785	-0.263279	-0.274173	-0.379778	-0.587173	-0.904581	-0.456263	-0.750537	-0.061598	-0.443628	-0.156511	-0.634396	-0.712162	-0.586908	-0.336981	-0.241714	-0.593527	-0.819809	-0.658893	-0.455297
RVBD_1369c	Rv1369c	-	FALSE	FALSE	FALSE	FALSE	0.408305	0.512004	0.679762	0.43964	0.541139	0.633739	0.563477	0.505091	0.0773454	-0.480615	0.713964	0.627235	0.345303	0.438113	0.435875	0.478849	0.549978	0.306692	0.654877	0.223245	0.467845	0.534573	0.274351	0.523499	0.668078	0.681239	0.647451	0.831034	0.633739	0.675097	0.754592	0.722919	0.608178	0.383946	0.638484	0.594829	0.727941	0.523901	0.74959	0.608016	0.611704	0.588369	0.464106
RVBD_1756c	Rv1756c	-	FALSE	FALSE	FALSE	FALSE	0.684476	0.551821	0.781659	0.524813	0.661174	0.789592	0.692576	0.631149	0.26353	-0.335235	0.901548	0.740846	0.437241	0.46076	0.496655	0.487922	0.619321	0.427718	0.756428	0.15972	0.516401	0.575926	0.134941	0.350128	0.698873	0.703472	0.75236	0.930806	0.789592	0.841617	0.914627	0.761684	0.736816	0.517876	0.482364	0.656904	0.855441	0.626851	0.860919	0.709725	0.739718	0.65475	0.608322
RVBD_1764	Rv1764	-	FALSE	FALSE	FALSE	FALSE	0.580179	0.517646	0.692179	0.489985	0.740135	0.726269	0.639441	0.535807	0.433339	0.0696571	0.836497	0.701099	0.327357	0.431221	0.513988	0.519467	0.563276	0.334515	0.679556	0.425287	0.470504	0.504604	0.117679	0.415936	0.694809	0.629211	0.709447	0.844598	0.726269	0.663314	0.766487	0.629704	0.712108	0.471952	0.43542	0.612281	0.739474	0.634642	0.817855	0.671377	0.672676	0.648563	0.536864
RVBD_1845c	blaR	-	FALSE	FALSE	FALSE	FALSE	NA	NA	4.85121	NA	NA	NA	NA	NA	NA	NA	8.26386	8.48164	NA	NA	NA	NA	NA	NA	NA	NA	NA	NA	NA	NA	NA	NA	NA	NA	NA	NA	NA	NA	NA	NA	NA	NA	NA	NA	NA	NA	NA	3.9692	NA
RVBD_2106	Rv2106	-	FALSE	FALSE	FALSE	FALSE	0.67742	0.564354	0.794844	0.442424	0.669172	0.741441	0.625056	0.638337	0.390063	-0.239379	0.848574	0.739317	0.391194	0.383355	0.47895	0.416385	0.562222	0.36127	0.6862	0.381652	0.493309	0.542435	0.249781	0.496008	0.701108	0.663997	0.720578	0.924669	0.741441	0.751725	0.794022	0.711549	0.745729	0.60322	0.515959	0.723909	0.72867	0.681423	0.820108	0.740825	0.752831	0.650944	0.574562
RVBD_2167c	Rv2167c	-	FALSE	FALSE	FALSE	FALSE	0.414395	0.461624	0.67919	0.373602	0.473863	0.694063	0.544144	0.39008	0.0312273	-0.195316	0.759787	0.565961	0.376224	0.300556	0.334	0.393528	0.395452	0.258422	0.651339	0.0394107	0.348589	0.432464	0.03039	0.15198	0.597419	0.505844	0.637306	0.833127	0.694063	0.657399	0.711032	0.488215	0.566257	0.310724	0.356767	0.515288	0.676861	0.539055	0.69976	0.557662	0.575767	0.52596	0.429429
RVBD_2198c	mmpS3	-	FALSE	FALSE	FALSE	FALSE	NA	NA	NA	NA	NA	NA	NA	NA	9.45086	NA	8.60956	6.2245	NA	NA	NA	NA	NA	NA	NA	NA	NA	NA	NA	NA	NA	NA	NA	NA	NA	NA	NA	NA	6.08161	NA	NA	NA	NA	NA	NA	NA	NA	4.82396	NA
RVBD_2279	Rv2279	-	FALSE	FALSE	FALSE	FALSE	0.532029	0.548917	0.735406	0.549139	0.731391	0.729654	0.628961	0.577983	0.342982	-0.618917	0.762601	0.598957	0.388687	0.374298	0.163218	0.312324	0.495463	0.34929	0.718219	0.487572	0.410156	0.492702	0.16436	0.376643	0.666762	0.524934	0.664949	0.88231	0.729654	0.723546	0.786009	0.6241	0.665198	0.542346	0.601551	0.639221	0.673317	0.539785	0.8049	0.640538	0.690983	0.643977	0.536261
RVBD_2355	Rv2355	-	FALSE	FALSE	FALSE	FALSE	0.488949	0.505241	0.675331	0.488156	0.619938	0.608453	0.545695	0.534814	0.125649	0.00885524	0.735886	0.650537	0.419809	0.353413	0.560063	0.494557	0.459026	0.353602	0.618934	0.464321	0.379665	0.476341	0.210585	0.503286	0.663073	0.634254	0.683717	0.834143	0.608453	0.610414	0.711938	0.660679	0.591304	0.385574	0.500585	0.531461	0.793121	0.521902	0.746586	0.606997	0.693055	0.60542	0.522249
RVBD_2479c	Rv2479c	-	FALSE	FALSE	FALSE	FALSE	0.430439	0.529086	0.683315	0.357709	0.708441	0.690976	0.551369	0.606488	-0.136602	-0.230825	0.781255	0.674693	0.367342	0.347416	0.475844	0.44083	0.484706	0.319551	0.652253	0.352312	0.342399	0.380033	0.119575	0.588145	0.616817	0.730315	0.646352	0.851826	0.690976	0.744742	0.811112	0.663406	0.645054	0.340407	0.519185	0.592711	0.829764	0.621061	0.765814	0.678176	0.683452	0.568972	0.567624
RVBD_2649	Rv2649	-	FALSE	FALSE	FALSE	FALSE	0.47141	0.551866	0.729355	0.584233	0.788931	0.707623	0.594516	0.526133	0.14253	-0.148693	0.794529	0.648404	0.449639	0.409327	0.3303	0.227984	0.559512	0.340556	0.691494	0.498978	0.46757	0.601707	0.18418	0.600843	0.714668	0.642608	0.723436	0.885456	0.707623	0.667528	0.772072	0.724021	0.675429	0.641505	0.465322	0.668968	0.723286	0.640107	0.798363	0.66768	0.75939	0.588806	0.54187
RVBD_2814c	Rv2814c	-	FALSE	FALSE	FALSE	FALSE	0.566498	0.600473	0.743118	0.568432	0.692792	0.775419	0.640384	0.593269	0.485186	-0.173516	0.827173	0.666018	0.388547	0.433892	0.472538	0.47771	0.567611	0.397537	0.737594	0.340174	0.402892	0.49819	0.191083	0.543367	0.666722	0.696882	0.7555	0.949786	0.775419	0.730736	0.843571	0.780558	0.640705	0.450551	0.437143	0.629758	0.753217	0.607328	0.85582	0.704407	0.664935	0.61305	0.56669
RVBD_3057c	Rv3057c	-	TRUE	TRUE	TRUE	TRUE	-1.03216	-1.02987	-1.40183	-0.973345	-1.21297	-0.860244	-1.07134	-0.857609	-0.942547	-0.449342	-1.27528	-0.762086	-0.939303	-0.834545	-1.23163	-1.37092	-1.2534	-1.09926	-1.12096	-1.13951	-1.14986	-0.890112	-0.699132	-1.09425	-0.629647	-0.904215	-0.755241	-0.668991	-0.860244	-0.548061	-0.892824	-0.58178	-0.740238	-1.10775	-0.820551	-0.726785	-0.218461	-0.745242	-0.713948	-0.928179	-0.707458	-1.07448	-1.01862
RVBD_3185	Rv3185	-	FALSE	FALSE	FALSE	FALSE	0.587241	0.507784	0.731747	0.440212	0.739282	0.746139	0.619272	0.644707	0.350275	-0.480688	0.790423	0.641642	0.344576	0.34543	0.426557	0.510253	0.510019	0.3934	0.713308	0.382955	0.445484	0.505105	0.130743	0.471985	0.678197	0.692073	0.69017	0.895019	0.746139	0.76475	0.825296	0.676575	0.643715	0.653186	0.379154	0.598433	0.754537	0.603459	0.853258	0.687039	0.68763	0.629033	0.543758
RVBD_3187	Rv3187	-	FALSE	FALSE	FALSE	FALSE	0.485241	0.531271	0.69165	0.495627	0.696038	0.654923	0.580569	0.672786	0.287587	-0.106151	0.820375	0.639714	0.4909	0.406068	0.39718	0.432725	0.463268	0.336625	0.705171	0.455621	0.422298	0.540971	0.179356	0.438213	0.639034	0.624037	0.67927	0.858714	0.654923	0.714767	0.770623	0.623742	0.668844	0.624947	0.45667	0.557339	0.716145	0.611257	0.806522	0.617751	0.686779	0.597784	0.520883
RVBD_3326	Rv3326	-	FALSE	FALSE	FALSE	FALSE	0.403126	0.502578	0.7052	0.396961	0.694084	0.700037	0.49292	0.454115	-0.0657079	-0.461296	0.77155	0.683694	0.411301	0.33574	0.303388	0.354243	0.484502	0.318484	0.675197	0.322522	0.432058	0.527006	0.0808331	0.460281	0.664122	0.580324	0.688941	0.87459	0.700037	0.69227	0.753799	0.653847	0.622308	0.433527	0.503391	0.614849	0.6917	0.524847	0.770485	0.63914	0.699226	0.596488	0.562199
RVBD_3380c	Rv3380c	-	FALSE	FALSE	FALSE	FALSE	0.433502	0.473422	0.613571	0.327409	0.6084	0.672327	0.574576	0.531132	0.380611	-0.212397	0.750352	0.683352	0.289896	0.365406	0.332411	0.535739	0.513371	0.335122	0.627079	0.385035	0.39231	0.452494	-0.0116081	0.488125	0.571362	0.645156	0.653692	0.81535	0.672327	0.652087	0.724486	0.635766	0.540401	0.604322	0.568676	0.5342	0.636182	0.504789	0.652987	0.640718	0.559866	0.498401	0.426391
RVBD_3475	Rv3475	-	FALSE	FALSE	FALSE	FALSE	0.477845	0.459595	0.692099	0.425407	0.500025	0.708273	0.610008	0.685856	-0.0251151	-0.113673	0.82729	0.655626	0.289945	0.388458	0.459902	0.451712	0.641479	0.327257	0.703832	0.409921	0.444254	0.528406	0.0904617	0.576198	0.661257	0.70659	0.71395	0.896337	0.708273	0.751648	0.801282	0.652638	0.674747	0.411497	0.530411	0.565478	0.699814	0.578483	0.77224	0.68161	0.673217	0.615276	0.518363
RVBD_3559c	Rv3559c	-	TRUE	TRUE	TRUE	TRUE	-9.54933	-3.67933	-4.23112	-4.05633	-8.53989	-3.51589	-1.21589	-0.710794	-2.49881	0.103053	-4.32383	-3.14959	-5.19842	-9.56156	-9.56667	-8.55092	-1.92907	-5.11879	-9.56	-4.76359	-3.01209	-9.5574	-9.55862	-3.37526	-5.63553	-2.83855	-2.47834	-3.87702	-3.51589	-5.1537	-5.32723	-8.54644	-3.80825	0.0886324	-0.514476	-9.56304	-9.55905	-3.82936	-5.29571	-4.77851	-4.54188	-4.77804	-4.62256
RVBD_3723	Rv3723	-	TRUE	TRUE	TRUE	TRUE	-1.59592	-1.81602	-2.47234	-1.00521	-0.807115	-1.71544	-1.09055	-2.39696	-0.340508	-1.92481	-1.96654	-0.514797	-2.13145	-2.07539	-0.94811	-3.17911	-1.67503	-1.81784	-2.76495	-2.15989	-1.00424	-1.90471	-1.80295	-1.1852	-2.10251	-1.94674	-2.35279	-2.46256	-1.71544	-2.44036	-2.5755	-0.973897	-2.34335	-2.75907	-2.38311	-2.40005	-1.93798	-2.41262	-2.52902	-3.07993	-2.55983	-2.7752	-2.74761
RVBD_3822	Rv3822	-	TRUE	TRUE	TRUE	FALSE	-0.964608	-0.614039	-0.745122	-0.532262	-0.640402	-0.897135	-1.13805	-1.01706	-0.666217	-0.69809	-0.976174	-0.646158	-0.16472	-0.495532	-0.140952	-0.910073	-0.721221	-0.710774	-0.780538	-0.953821	-0.638165	-0.802049	-0.889279	-0.873982	-0.463932	-0.612905	-0.510459	-0.345868	-0.897135	-1.32052	-0.741959	-0.613179	-0.636294	-0.084225	-0.416455	-0.988505	-0.357058	-0.521838	-0.760288	-0.538552	-0.671956	-0.385809	-0.59125
RVBD_3880c	espL	-	TRUE	TRUE	TRUE	TRUE	-4.09371	-2.52319	-2.17662	-1.65861	-1.52927	-3.16369	-1.48392	-0.273111	-2.09948	-1.76119	-1.95242	-1.95084	-4.43845	-0.849898	-4.30645	-4.79361	-1.80086	-3.82096	-2.84997	-2.20218	-2.29529	-3.36542	-5.80628	-2.42449	-2.80251	-2.7995	-1.95687	-2.78125	-3.16369	-3.96069	-2.62921	-1.99173	-2.8918	-3.44069	-2.12836	-1.31577	-4.78714	-4.24341	-3.69921	-4.69586	-2.4509	-3.31447	-2.67925
RVBD_3569c	hsaD	mod01	TRUE	TRUE	TRUE	TRUE	-2.05067	-3.38008	-2.72327	-4.13365	-1.48226	-3.57333	-1.35027	-4.51256	-2.34677	-1.83981	-1.62695	-1.76765	-4.14235	-7.27808	-1.18793	-3.47997	-5.4334	-1.79522	-3.67134	-5.33758	-2.09788	-2.72077	-1.15158	-3.421	-3.6959	-2.95747	-4.13771	-2.9041	-3.57333	-4.39943	-3.5559	-4.08508	-3.80918	-1.18944	-1.65854	-2.18239	-1.85266	-2.741	-4.25084	-4.71377	-3.91648	-2.67233	-2.66481
RVBD_0169	mce1A	mod05	TRUE	FALSE	TRUE	FALSE	0.207001	-0.0498124	-0.140161	-0.106421	0.533982	-0.538644	0.333466	-0.489754	0.100599	0.137535	-0.580488	-0.618639	-0.878086	-1.08424	-0.274482	0.0277343	-0.174573	-0.451691	-0.139769	-0.551561	0.50181	-0.422489	0.067811	0.579771	0.0538795	-0.15055	-0.271818	-0.176471	-0.538644	-1.25955	-0.383728	-0.0573706	-0.0653005	-0.200041	0.350709	0.0342267	-0.114085	-0.360098	-0.649976	-1.32216	-0.683853	-0.232481	-0.387052
RVBD_0172	mce1D	mod05	TRUE	FALSE	TRUE	FALSE	0.0819492	-0.114774	-0.33815	-0.0232552	0.260811	-0.589974	0.301032	-0.655723	-0.191895	0.150033	-0.638488	-0.596733	-1.0846	-1.30352	-0.357119	-0.235497	-0.918639	-0.533255	-0.142975	-0.496066	0.559743	-0.485712	-0.135796	0.480804	-0.0252532	-0.241108	-0.460468	-0.497747	-0.589974	-0.903757	-0.584589	-0.567755	-0.330293	-0.416597	0.385154	-0.0436925	-0.445885	-0.325741	-0.771812	-1.50758	-0.868685	-0.515657	-0.500059
RVBD_1127c	ppdK	mod06	TRUE	TRUE	TRUE	FALSE	-2.01033	-1.7773	-1.23818	-0.84152	-9.49864	-2.23319	-1.71203	-1.85855	-0.784179	0.269004	-2.03484	-1.81673	-1.59775	-2.44565	-1.22784	-1.37366	-2.21005	-0.716326	-1.33356	-1.07125	-0.674476	-2.85207	-2.23347	-1.63495	-1.241	-0.824008	-2.1995	-1.86275	-2.23319	-1.02448	-1.38458	-2.15664	-1.4208	-1.00586	-1.72235	-2.52127	-2.28272	-1.70016	-1.5909	-2.00806	-1.96163	-1.83815	-1.53869
RVBD_2506	Rv2506	mod12	TRUE	TRUE	TRUE	FALSE	-1.7253	-1.62473	-1.33984	-0.452729	-2.26706	-0.79193	-1.72345	-1.04783	-0.279012	-2.44305	-1.17495	-0.593411	-1.50164	-1.48971	-2.66621	-2.30494	-1.61562	-2.38379	-0.671015	-0.88093	-1.46571	-0.801115	-1.10432	-0.622269	-0.621211	-1.52791	-1.45831	-0.601944	-0.79193	-0.146862	-0.382718	-0.880157	-0.642393	-1.80479	-0.90485	-0.621224	-1.57851	-0.645071	-0.11909	-0.673974	-1.1221	-0.579687	-0.979908
RVBD_1072	Rv1072	mod13	FALSE	FALSE	FALSE	FALSE	0.25381	0.460605	0.509689	-0.0264756	-0.477063	2.46304	0.670645	0.907174	-0.881202	2.54615	1.38113	2.03487	-0.118549	-0.445115	-1.62521	1.66241	0.105878	-0.455637	0.690285	-0.603407	-0.101005	0.598077	0.54318	-0.173712	0.472255	-0.997492	0.816764	0.872304	2.46304	1.77519	1.35802	0.853172	0.764262	-0.642352	0.536308	1.48833	1.96654	1.79049	2.74391	2.15181	2.53402	1.6901	1.66129
RVBD_1272c	Rv1272c	-	TRUE	TRUE	TRUE	TRUE	-2.19721	-1.60869	-1.90776	-1.10345	-1.20731	-2.21557	-0.950096	0.126869	-0.405219	-1.67518	-1.18645	-0.860443	-1.8284	-1.09678	-1.28876	-1.35268	-1.19842	-1.33627	-1.78416	-1.54114	-1.22866	-1.48978	-1.49921	-1.24356	-1.65097	-0.99279	-1.81422	-1.42686	-2.21557	-1.42767	-1.22551	-1.54296	-1.62002	-0.880414	-0.92161	-1.12695	-0.642867	-1.42603	-1.45369	-1.4387	-1.89483	-1.28916	-1.7312
RVBD_3140	fadE23	-	TRUE	FALSE	TRUE	FALSE	-1.96506	-0.380014	-1.41741	-0.341796	-1.77089	-0.779243	-1.58582	-0.92045	-0.493835	0.0144073	-1.47451	-0.828251	-0.799681	-0.0595417	-0.150632	-0.864454	-0.512864	-0.472066	-0.841511	-1.10773	-1.22981	-0.508516	-0.985883	-1.16259	-0.631962	-1.31159	-0.360117	-1.30535	-0.779243	-0.667351	-0.835461	-0.472134	-0.68416	-0.11804	-0.477343	-0.366165	-0.836925	-0.52155	-0.419661	-0.325237	-0.644981	-1.12634	-0.459734
RVBD_0174	mce1F	mod05	TRUE	FALSE	TRUE	FALSE	0.0927325	-0.0291398	-0.367805	-0.564727	0.411544	-0.677265	0.230501	-0.196542	-0.291824	-0.0978255	-0.697833	-0.553969	-1.00102	-1.37605	-0.849179	-0.460041	-0.206801	-0.578247	-0.121686	-0.554234	0.50066	-0.499259	-0.169785	0.613249	0.0519602	-0.0151393	-0.47912	-0.611926	-0.677265	-0.905474	-0.582971	-0.518395	-0.0975378	-0.367058	-0.219149	0.0253988	-0.00210575	-0.276457	-0.853483	-1.16051	-0.73594	-0.362715	-0.329698
RVBD_3132c	devS	mod05	TRUE	TRUE	TRUE	TRUE	-1.94248	-1.75583	-2.26495	-2.63149	-1.30063	-1.48674	-0.906116	-0.617679	-0.654336	-2.24059	-1.2187	-1.25551	-0.445112	-0.648361	-0.971865	-5.82305	-3.98915	-1.13693	-1.89451	-1.28979	-2.97253	-2.39129	-3.25007	-4.71438	-0.262637	-4.43482	-1.96182	-1.52822	-1.48674	-0.0714362	-1.87419	-2.02486	-2.01539	-2.90606	-1.54689	-0.985969	-4.9731	-0.502511	-1.12375	-1.20305	-2.09563	-1.45612	-1.84142
RVBD_2681	Rv2681	mod06	TRUE	FALSE	FALSE	FALSE	-1.76241	-0.0757009	-0.670534	0.104504	-0.397023	-0.123328	-1.41419	0.041859	-0.224597	-1.90832	-0.866511	-0.483942	-0.54763	-0.616411	-0.566117	-2.13685	-1.13613	-1.82595	-0.489756	0.0967124	-0.327755	0.122318	-0.264895	-0.480462	-0.431221	-0.618611	-0.137132	-0.0546094	-0.123328	0.487924	0.0388218	-0.276121	-0.0268707	-0.6051	-0.0896383	-0.380936	-0.844552	0.0582433	-0.350819	-0.0248081	-0.561404	-0.0720934	-0.575546
RVBD_1013	pks16	mod11	TRUE	FALSE	FALSE	FALSE	0.434782	-0.507711	-0.356632	-0.210338	-0.471667	-0.0124329	0.0749468	-0.00115015	0.810633	-0.451054	1.04015	1.10098	-0.0889131	-1.58935	-1.05319	-6.1231	0.288985	0.267867	0.0416616	0.442098	-0.313329	-0.00209488	-0.868795	-0.331343	0.132036	-0.196451	-0.355453	-0.21083	-0.0124329	0.303419	-0.528288	0.0982738	-0.233107	-0.16435	-1.07192	-0.99449	-0.257606	0.376706	0.522697	0.643206	0.621446	0.752358	0.789864
RVBD_3864	espE	mod20	FALSE	FALSE	FALSE	FALSE	-5.197	0.589058	1.89525	3.17383	-4.18479	-0.391857	1.06564	0.252667	-5.21075	-4.20755	2.49685	2.96564	1.11635	-5.20245	-5.21646	-4.20582	-1.21249	-5.2117	-1.89956	-5.20785	-1.05287	-5.21095	-5.19984	-5.19077	1.05462	-5.19664	-1.89358	1.0489	-0.391857	3.30551	0.65975	-0.268514	1.94177	4.38038	-5.19011	-5.2089	-5.20686	1.19825	0.908631	1.00991	2.26787	2.97606	2.21595
RVBD_0818	Rv0818	-	FALSE	FALSE	FALSE	FALSE	0.506051	0.633713	1.04457	0.925628	0.320953	1.78022	0.807033	0.638324	1.31365	2.11398	1.18921	1.29484	-0.138337	0.367994	0.489795	2.0388	1.46984	1.54145	1.16297	0.402549	1.03278	0.545231	0.726395	1.07791	0.833959	0.801107	1.03607	1.01874	1.78022	1.52322	0.719411	1.07333	1.0372	1.36537	1.03159	1.25164	1.27916	1.54525	1.65132	1.64549	1.75378	1.2926	1.54527
RVBD_0097	Rv0097	mod01	TRUE	TRUE	TRUE	TRUE	-1.74973	-2.03747	-1.9819	-0.508298	-1.32984	-2.27899	-0.892057	-1.13719	-0.72213	-1.65682	-0.940353	-0.513544	-2.61186	-2.67225	-0.508656	-2.38924	-2.37427	-1.57422	-3.05441	-2.43543	-1.92567	-2.06086	-2.22859	-2.4645	-2.14804	-2.64609	-1.53527	-1.98593	-2.27899	-3.20037	-2.13289	-0.323954	-1.71661	-0.314353	-0.855832	-2.28344	-0.382148	-1.9726	-2.17041	-2.05456	-2.70733	-1.59187	-2.22368
RVBD_3551	Rv3551	mod04	TRUE	TRUE	TRUE	TRUE	-6.67816	-5.68191	-5.19308	-3.79872	-2.90319	-3.65491	-2.20511	-4.31835	-3.12738	-10.5648	-1.75444	-0.971245	-5.55831	-11.5642	-1.42034	-10.5589	-5.81832	-3.82556	-6.20596	-11.5567	-6.8416	-7.01802	-4.17997	-3.84214	-7.16032	-11.5532	-8.23581	-5.82006	-3.65491	-4.37392	-5.30549	-2.38536	-4.90089	-0.761425	-2.76097	-4.02866	-2.38158	-5.31968	-6.52608	-8.19291	-6.99338	-5.13011	-6.8288
RVBD_3283	sseA	mod06	TRUE	TRUE	FALSE	FALSE	-5.34369	-1.4905	-3.32547	-1.51962	-9.78648	0.34944	-2.61942	0.442345	-10.7917	-3.48388	-0.990059	0.353619	0.0830726	-0.0380454	-0.230777	-9.79452	-4.70461	-1.53623	-1.45884	1.14688	-0.425814	-0.0173068	0.83056	-1.62156	-0.334688	-3.26983	-1.00556	-0.294912	0.34944	0.155147	0.378333	-0.437005	0.415126	-1.34291	0.472064	-2.22716	-2.04924	-0.524166	-1.38324	0.290577	-1.97376	-1.34209	-2.61466
RVBD_3295	Rv3295	mod07	F	F	F	F	0.0259313	0.206747	-0.0413609	0.180228	0.24484	-0.193229	-0.182294	0.325678	1.14262	-0.0171768	-0.586009	-0.374505	0.135957	-0.294056	-0.0429071	-0.197352	-0.0424786	-0.20519	-0.10928	0.500978	-0.0192733	0.268704	0.0400073	0.442973	0.0937978	0.0269537	-0.0133439	-0.0856072	-0.193229	-0.09527	-0.0901837	0.199098	-0.0472654	-0.0353601	0.285439	0.279086	0.36512	0.015285	-0.0454332	0.0553108	-0.214296	0.0824246	-0.157326
RVBD_0353	hspR	mod11	TRUE	TRUE	TRUE	TRUE	-2.94919	-2.12963	-2.24174	-2.98132	-3.59182	-3.39115	-2.36909	-2.31484	-1.10666	-10.1848	-1.86914	-1.92208	-2.01268	-5.12608	-1.00451	-1.09149	-3.76411	-4.04484	-3.22968	-2.34732	-2.88383	-2.73108	-2.60334	-2.39705	-2.65904	-2.58186	-2.7949	-2.90246	-3.39115	-4.57074	-2.59691	-2.74255	-2.30943	-10.167	-0.665261	-2.22293	-1.18137	-3.55777	-2.11656	-2.53442	-3.72256	-4.77663	-5.06767
RVBD_1238	sugC	mod17	TRUE	TRUE	TRUE	TRUE	-1.72226	-1.48195	-1.51142	-3.47248	-1.88679	-2.14546	-0.309831	-1.89503	-0.687461	-3.75579	-1.31164	-0.884497	-1.57447	-1.85539	-1.72618	-4.26579	-2.43656	-1.93697	-1.57671	-2.54343	-1.60885	-2.32939	-1.41999	-2.18751	-2.06352	-1.47265	-1.42939	-1.64814	-2.14546	-2.5342	-1.73724	-1.48562	-1.52557	-1.52101	-1.88613	-1.70987	-0.902584	-1.53959	-2.1204	-1.8065	-1.73494	-1.82005	-1.53463
RVBD_1633	uvrB	mod20	TRUE	FALSE	FALSE	FALSE	-0.494775	0.0264685	-0.517542	-0.417087	-0.837322	-0.869961	0.756314	-0.800541	0.757835	-2.79055	1.03344	0.723716	-0.0560858	-1.28054	-1.77229	0.552462	-0.656014	-0.640732	-0.340256	0.0999267	0.367867	-0.28338	-0.535042	0.797057	0.142401	0.225129	-0.555336	-0.8431	-0.869961	-0.913088	-0.0125267	-0.0881003	-0.176254	0.0633996	0.447254	-0.0897569	0.980508	-0.723343	-0.193987	-0.0344442	-0.00641933	-0.419227	-0.292706
RVBD_0190	Rv0190	-	TRUE	TRUE	TRUE	TRUE	-5.40288	-4.09532	-5.41214	-10.2915	-9.27202	-1.8638	-3.95378	-4.10076	-10.2748	-1.02966	-2.63856	-1.3311	-3.9859	-10.289	-2.82406	-1.66733	-3.0456	-4.18576	-3.86085	-3.72269	-6.12056	-5.26683	-4.34538	-10.2711	-10.2788	-3.13193	-6.0271	-7.00123	-1.8638	-3.67472	-2.6083	-4.64251	-3.35328	-3.65837	-10.2799	-1.69653	-5.96847	-2.67391	-3.83932	-3.29086	-4.91816	-3.84666	-2.44621
RVBD_0096	PPE1	mod01	TRUE	TRUE	TRUE	TRUE	-2.3163	-2.30464	-1.68477	-0.73846	-0.980292	-2.34101	-1.08488	-1.36606	-0.851612	-2.73484	-0.997388	-0.651785	-2.27508	-4.50989	-0.504998	-1.07083	-2.66884	-1.26384	-2.9559	-2.77931	-1.50021	-2.76229	-1.91952	-1.47363	-2.35357	-2.49727	-1.83285	-2.2704	-2.34101	-3.27549	-2.37287	-0.96083	-2.03943	-0.0866954	-1.36313	-2.41022	-0.447167	-2.15437	-2.80803	-2.7646	-3.35036	-1.58835	-2.59211
RVBD_0994	moeA1	mod05	TRUE	TRUE	TRUE	TRUE	-4.00735	-4.82062	-3.71344	-3.87358	-4.04338	-2.52077	-2.03283	-4.09782	-2.04704	-10.2777	-1.60335	-0.710936	-1.72614	-3.52463	-3.05875	-5.99604	-7.27779	-3.47289	-2.20934	-3.3847	-3.5531	-1.75098	-6.0448	-3.44969	-5.03783	-1.30861	-3.33086	-2.93002	-2.52077	-2.7225	-2.42585	-3.09625	-2.89846	-0.756608	-11.2601	-3.73887	-11.2777	-2.9669	-2.98071	-1.8206	-2.72091	-3.41089	-3.42359
RVBD_2140c	TB18.6	mod06	TRUE	TRUE	TRUE	TRUE	-2.49138	-4.21414	-3.66312	-3.53685	-2.40796	-3.17278	-3.87072	-2.33372	-2.99733	-9.46955	-1.36288	-0.793162	-3.77449	-3.44768	-3.47802	-9.46346	-2.6146	-7.05822	-1.81552	-2.52392	-2.00667	-2.90172	-5.64036	-2.14414	-3.74058	-2.05537	-3.76875	-1.8535	-3.17278	-2.49758	-1.90046	-2.02726	-1.93688	-3.83939	-4.59635	-1.73361	-2.98884	-4.06936	-3.27914	-3.75219	-3.49417	-4.43045	-4.19266
RVBD_3311	Rv3311	mod12	TRUE	TRUE	TRUE	TRUE	-2.23998	-1.21368	-1.08109	-2.40787	-1.42017	-1.77593	-0.110043	-2.03352	-1.09466	-0.454931	-1.16198	-0.966	-2.68675	-2.53907	-1.0585	-1.29209	-3.03192	-0.479513	-2.25488	-4.99039	-1.37543	-3.5188	-4.48067	-2.42364	-1.33058	-1.2271	-2.02193	-2.22553	-1.77593	-3.00098	-3.5808	-2.67765	-2.18312	-1.56623	-2.28353	-2.63846	-5.22224	-3.16451	-3.03365	-3.00474	-3.03092	-1.94841	-2.22726
RVBD_3680	Rv3680	mod15	FALSE	FALSE	FALSE	FALSE	-1.68446	-2.28379	-1.70071	-1.69223	-0.680063	-1.69024	-1.69979	-1.70229	-1.68336	5.62948	4.94598	6.7238	2.28081	-1.69247	-1.70841	-0.692565	-1.69283	4.69403	-1.6968	-1.69225	-1.69453	2.56361	1.82517	-1.67827	-1.67646	-1.68556	-1.69436	-1.70026	-1.69024	-0.683408	-1.70741	-0.689009	-1.69224	-0.664287	-1.68174	-1.71091	-1.69744	-1.68759	2.56963	-1.6829	-1.69085	1.55408	-1.70481
RVBD_0003	recF	mod18	FALSE	FALSE	FALSE	FALSE	0.700023	-0.768923	0.525107	1.45115	0.936663	-0.392191	0.73735	0.357723	0.246935	-1.62589	1.14225	1.05554	0.738703	-0.776385	0.212815	-0.279729	0.15762	0.280246	-0.231388	0.428475	0.167341	-0.238922	0.172409	-1.66193	-0.266142	1.09086	0.403094	0.145378	-0.392191	-0.585024	0.0404486	0.163612	0.732241	-0.807263	-0.742127	-0.540858	-0.518571	0.441568	-1.05312	0.273246	-0.337084	0.618409	0.339157
RVBD_1908c	katG	-	FALSE	FALSE	FALSE	FALSE	NA	NA	NA	NA	NA	NA	NA	8.44556	9.45086	NA	6.70129	6.38884	4.18129	NA	NA	NA	NA	NA	NA	NA	NA	NA	NA	NA	NA	NA	NA	NA	NA	NA	NA	NA	4.84959	NA	NA	NA	NA	NA	NA	NA	NA	3.9692	NA
RVBD_3136Ac	-	-	TRUE	FALSE	FALSE	FALSE	-0.0609949	-0.432689	-0.184866	-0.360576	-0.305968	-0.248068	-0.451229	-0.151549	-0.861497	-0.0788988	-0.813452	-0.493159	-0.570326	-0.533693	-0.519236	0.0121801	-0.264417	-0.21125	-0.511901	0.232488	-0.348919	-0.307326	0.169588	0.22576	-0.319256	-0.365739	-0.409027	-0.392048	-0.248068	-0.188151	-0.484816	-0.247383	-0.50307	-0.513399	0.226925	0.153515	0.0560678	-0.0930876	-0.275544	-0.432687	-0.58011	-0.324056	-0.353167
RVBD_0451c	mmpS4	mod04	TRUE	TRUE	TRUE	TRUE	-0.557679	-2.36793	-1.07902	-2.70904	-4.06654	-1.66784	-1.64511	-0.327723	-2.67652	-9.32057	-1.75839	-1.37463	-3.13323	-4.37141	-5.23876	-5.04026	-10.3192	-1.25002	-2.12859	-1.68992	-1.28463	-2.28814	-4.48432	-3.11628	-1.72021	-3.28121	-2.76013	-2.87038	-1.66784	-0.501305	-1.34611	-1.52562	-2.4811	-9.30273	-2.55501	-3.09343	-10.3219	-1.9109	-1.51826	-1.57061	-1.69052	-1.99094	-1.38264
RVBD_2474c	Rv2474c	mod05	TRUE	TRUE	FALSE	FALSE	-2.91622	-2.933	-1.8224	-2.47534	-2.78974	-1.41706	-1.9549	-1.30001	-1.02413	-9.73164	-1.9787	-1.27849	-1.84114	-2.76226	-0.311035	-1.30493	-2.2925	-2.23441	-2.68244	-1.61666	-1.38564	-1.73121	-2.80169	-3.08262	-1.13465	-2.98914	-1.66335	-0.860099	-1.41706	0.0785656	-0.437149	-2.50334	-1.66831	-0.636185	-2.09947	-2.2561	-1.53506	-1.3971	-0.909639	-1.47223	-1.50137	-1.11457	-1.74433
RVBD_3502c	Rv3502c	mod05	TRUE	TRUE	TRUE	TRUE	-2.38971	-3.0585	-3.47593	-1.81771	-1.11116	-2.47115	-1.90739	-2.41244	-1.52126	-4.25704	-1.31709	-0.795544	-3.71403	-11.5768	-0.798783	-1.15217	-2.48793	-2.47677	-2.72742	-3.49981	-2.78037	-3.31894	-2.42835	-2.19056	-3.27867	-1.76187	-2.54149	-3.15087	-2.47115	-2.50264	-3.55703	-2.28514	-1.93444	-2.47791	-3.97673	-3.09588	-1.04667	-2.17096	-5.56237	-3.52269	-3.86389	-3.07189	-3.32953
RVBD_1565c	Rv1565c	mod06	TRUE	FALSE	TRUE	FALSE	-0.576902	-1.22007	-1.78007	1.12162	-0.627828	-2.12597	-1.18276	-1.09311	-0.692573	-7.85569	1.66725	0.728222	-0.984927	-0.600816	0.22045	1.95452	0.614185	-1.97729	-2.57428	-2.15645	-0.501324	-1.39551	-1.05653	-2.66879	-2.18861	-0.215983	-0.856763	-0.0574356	-2.12597	-2.38709	-1.58114	-2.54977	-1.33387	-0.246864	-0.354156	-2.555	-4.5328	-1.66636	-0.942178	-1.16032	-0.503687	-1.21521	-0.47639
RVBD_3160c	Rv3160c	mod06	TRUE	FALSE	TRUE	FALSE	-2.27463	-1.21473	-2.54309	-2.68429	-7.85449	-2.14125	-2.16184	-1.3149	-0.99492	-1.55062	-2.33164	-0.954422	-2.63744	-5.34567	-1.12221	-2.05862	-2.61199	-8.874	-1.97619	-0.552054	-1.23437	-2.98402	-0.443238	-8.85383	-1.71549	-2.4566	-4.32874	-2.49154	-2.14125	-4.46607	-0.993252	-2.97316	-2.02875	-7.85344	-8.85752	-2.97663	-1.95029	-1.60181	-0.980398	-0.650782	-0.58683	-1.87858	-2.82562
RVBD_2535c	pepQ	mod20	FALSE	FALSE	FALSE	FALSE	-5.81768	-6.41284	-5.8202	-5.82083	-4.80745	-5.81981	-0.947984	-5.82791	3.05678	-4.82095	2.9287	3.45638	-5.83735	-0.503091	-5.83314	-4.81726	-0.533926	-5.83129	-5.82628	-5.81542	-2.58402	-5.81908	-2.48337	-5.80391	-1.89556	-5.81031	-5.81357	-5.8247	-5.81981	-4.81156	-1.97524	-4.80918	-5.81895	-4.79907	-5.81018	-5.83378	-5.82573	-2.43288	-5.8112	-2.55707	-5.81099	-1.34821	-3.42432
RVBD_0175	Rv0175	mod05	TRUE	FALSE	TRUE	FALSE	-0.128425	-0.597107	-0.366664	-0.961428	0.159987	-1.11633	0.0364041	-0.797679	-1.32478	-0.264915	-1.12846	-1.63728	-1.4492	-1.23216	-0.0714854	0.124723	0.0598214	-0.661003	0.0770806	-0.667775	0.472301	-0.140091	-0.15049	0.497161	-0.216182	-0.205042	-0.368685	-0.354482	-1.11633	-2.10413	-0.718073	-0.303936	-0.502264	-0.251732	-0.339404	-0.364664	0.272426	-0.603156	-1.28215	-1.02314	-0.985314	-0.748999	-0.454071
RVBD_1287	Rv1287	mod06	TRUE	TRUE	FALSE	FALSE	-0.3961	-1.62604	-1.70292	-1.97236	-2.30429	-1.32647	-1.57368	-1.56958	-0.488877	-3.35238	-1.1997	-1.24315	-0.100173	-1.22879	-1.72047	-2.14214	-0.315388	-0.159125	-1.06289	-0.696411	-0.596432	-1.68227	-0.503791	-0.536906	-0.263728	-0.221893	-0.98217	-1.17476	-1.32647	-0.736045	-0.905621	-0.717259	-0.758612	-0.878111	0.00872899	0.0169394	-1.45528	-0.999668	-0.971837	-0.655906	-1.66466	-1.65769	-1.97355
RVBD_3494c	mce4F	mod16	TRUE	TRUE	TRUE	TRUE	-1.39545	-1.65817	-0.611807	-0.759475	-1.56048	-1.11364	-0.355366	-1.3219	-0.768416	-1.23172	-0.767058	-0.191139	-1.43727	-2.05112	-1.63269	-1.72003	-1.57108	-1.13073	-1.28949	-1.76905	-0.968843	-1.7964	-1.43786	-1.5313	-0.989866	-1.0818	-1.27839	-1.4357	-1.11364	-1.37405	-1.05077	-0.675819	-1.32825	-0.326783	-1.41008	-1.09848	-0.92519	-1.25682	-1.41261	-1.4679	-1.55233	-1.42327	-1.40086
RVBD_0561c	Rv0561c	mod06	TRUE	TRUE	FALSE	FALSE	-3.17624	-1.71092	-4.19739	-1.24314	-2.94867	-1.76141	-3.35727	-2.39121	-2.76089	-2.37809	-1.14692	-0.494541	-0.195086	-0.41525	-0.196272	-5.4094	-3.76274	-0.379731	-1.00694	-0.176794	-0.931281	0.00646952	0.171257	-0.119761	-0.64078	-0.81757	-1.29794	-0.53736	-1.76141	-0.121698	-0.737467	-0.80764	-0.399441	0.331421	-0.2881	-1.47757	-0.83878	-1.15129	-1.90439	-0.882	-2.36424	-1.28012	-3.20425
RVBD_1340	rphA	-	FALSE	FALSE	FALSE	FALSE	NA	4.3229	NA	NA	NA	4.90393	8.40638	NA	NA	NA	7.30992	7.68685	NA	NA	NA	NA	5.58531	6.90058	NA	NA	NA	NA	NA	NA	NA	NA	NA	NA	4.90393	NA	NA	NA	NA	NA	NA	NA	NA	NA	NA	NA	NA	3.9692	NA
RVBD_1349	irtB	-	TRUE	TRUE	TRUE	TRUE	-4.13702	-3.26579	-4.79538	-2.56672	-1.81612	-1.1579	-3.76828	0.0799595	-8.0512	0.194857	-2.52416	-1.39761	-3.69661	-4.54097	-8.07642	-7.06364	-8.06718	-8.07158	-3.83547	-8.06157	-2.48495	-1.80287	-3.2427	-8.04944	-2.43871	-2.66894	-2.40592	-3.85808	-1.1579	-1.76689	-8.06601	-7.05165	-1.59522	-7.04974	-0.754364	-4.53947	-3.74878	-2.4729	-2.83959	-4.15003	-2.85796	-4.83114	-4.28652
RVBD_0111	Rv0111	mod04	TRUE	TRUE	TRUE	TRUE	-1.66503	-1.23409	-0.459619	-1.33516	-0.961082	-1.23333	-0.739324	-0.995649	-0.799629	-0.667271	-0.669622	-0.46686	-0.507188	-0.809459	-0.529591	-0.926603	-0.121487	-0.888781	-0.777362	-1.29501	-1.15524	-0.799523	-0.927002	-1.21609	-0.863235	-0.776091	-0.648106	-0.809811	-1.23333	-0.444932	-0.743289	-0.854421	-0.584355	-0.510883	-1.05892	-1.37739	-0.297462	-0.911698	-0.800805	-0.572561	-0.494748	-0.639897	-0.822601
RVBD_3867	espH	mod06	TRUE	TRUE	TRUE	TRUE	-2.7315	-1.98465	-1.23178	-3.49819	-3.55115	-1.27591	-0.776658	-1.12784	-1.06811	-1.70241	-1.09501	-0.870412	-1.76507	-1.80155	-0.82859	-1.08827	-1.94586	-4.6561	-2.38788	-1.59569	-1.35432	-1.97825	-1.88935	-4.08405	-2.81152	-1.61759	-2.97015	-2.38112	-1.27591	-1.7948	-1.53158	-1.60457	-2.1226	-0.854304	-3.69242	-1.05795	-5.23411	-1.65465	-1.6802	-1.79537	-1.86123	-1.75093	-2.39539
RVBD_2344c	dgt	-	TRUE	TRUE	TRUE	TRUE	-1.49912	-0.846648	-1.30236	-0.590244	-0.745145	-0.964085	-0.685493	-0.560431	-0.539138	-1.25031	-0.825615	-0.320894	-1.1185	-0.788307	-0.444159	-1.95873	-0.847262	-1.78824	-0.977215	-0.885953	-0.669304	-0.383993	-1.02198	-0.963983	-0.710713	-0.679857	-0.994831	-0.912634	-0.964085	-0.750167	-0.556889	-1.02291	-0.656783	-2.02046	-1.41018	-1.29218	-0.615807	-0.559365	-0.434925	-0.669891	-0.613417	-0.783999	-0.894715
RVBD_1273c	Rv1273c	-	TRUE	TRUE	TRUE	TRUE	-2.31796	-1.606	-1.70488	-1.31108	-0.915559	-1.45145	-0.979553	-1.70728	-0.856129	-1.0908	-1.0654	-1.03622	-1.80918	-2.43121	-0.535462	-1.74021	-1.81403	-1.8773	-2.00102	-2.68863	-1.83011	-2.17568	-1.04339	-1.57752	-1.40334	-1.38719	-2.0305	-1.44004	-1.45145	-2.38674	-1.86295	-1.55859	-1.96573	-1.34358	-0.870637	-1.50429	-1.75558	-1.49023	-1.73725	-1.97386	-1.70995	-1.86486	-1.88564
RVBD_2684	arsA	mod02	TRUE	FALSE	TRUE	FALSE	-0.266717	-0.421604	-0.619553	-0.643195	0.453883	-0.246541	-0.590471	-0.681565	-0.61412	-0.615403	-0.794198	-0.860309	-0.557706	-0.970738	-1.64067	-0.132631	-0.496543	-0.343797	-0.471006	0.341904	-0.864707	-0.288034	-0.437845	-0.227362	-0.448706	-0.0759358	-0.146799	-0.620341	-0.246541	-1.10489	-0.40588	-0.0489373	-0.610774	-0.403109	-0.40221	-0.0742261	-0.157674	-0.304476	-0.316861	-0.480402	0.0305763	-0.905885	-0.104119
RVBD_0433	Rv0433	-	TRUE	FALSE	TRUE	FALSE	-0.0505201	-0.31243	-0.30928	-0.259388	-0.225678	-0.322728	-0.480546	-0.924089	-0.30427	0.0225511	-0.606505	-0.548159	-0.214067	-0.734765	-0.665441	-0.0951201	-0.130682	-0.296746	-0.442475	0.00768745	-0.376805	-0.396332	-0.189341	-0.339	-0.406676	-0.130509	-0.289605	-0.244502	-0.322728	-0.44103	-0.379726	-0.168652	-0.256841	-0.481138	-0.0863877	-0.0828667	-0.181078	-0.214742	-0.215847	-0.405229	-0.265439	-0.253946	-0.294949
RVBD_2097c	pafA	-	TRUE	TRUE	FALSE	FALSE	-6.32587	-6.93121	-6.33237	-6.34076	-5.31671	-6.33808	-6.33231	-6.33597	-6.33158	0.980184	-6.9181	-6.92027	-6.35434	-6.34282	-6.34867	-5.33027	-6.3376	-6.34106	-6.33788	-6.32749	-6.33898	-6.33694	-6.33528	-6.32462	-6.33011	-6.31753	-6.33792	-6.33119	-6.33808	-5.33429	-6.33636	-5.32906	-6.33627	-5.32744	-6.32543	-6.34318	-6.33808	-6.3262	-6.33263	-6.33864	-6.33381	-3.96206	-6.34544
RVBD_2498c	citE	mod13	TRUE	TRUE	TRUE	TRUE	-1.97752	-2.7139	-2.05217	-0.711551	-2.07497	-2.31122	-1.02748	-1.82079	-1.33789	-1.15857	-1.41093	-0.470533	-1.31299	-1.88794	-1.53767	-1.01733	-1.48402	-0.734989	-2.13601	-2.08524	-2.24143	-1.91446	-2.30395	-3.26795	-2.82183	-2.58794	-2.27782	-0.792787	-2.31122	-1.4756	-1.92108	-3.07275	-1.94902	-1.37465	-1.55685	-0.925126	-0.768489	-0.68785	-1.68292	-1.17619	-2.16167	-1.06646	-2.49582
RVBD_1963c	mce3R	-	TRUE	FALSE	TRUE	FALSE	-0.502232	-0.178385	-1.19344	0.10304	-0.817475	-1.49001	-0.75927	-0.908672	-1.15003	-0.989485	-1.25264	-0.999424	-1.81389	-1.85745	-0.481504	-2.26927	-0.980961	-1.43246	-0.75395	-0.18544	-0.546094	-0.358136	-0.639044	-0.348123	-0.736247	-0.644368	-1.0052	-0.895714	-1.49001	-1.12219	-1.3769	-1.33339	-1.25035	-1.66596	-0.827221	-0.559257	-1.89901	-1.65036	-1.14303	-1.07095	-1.28352	-0.773531	-1.02515
RVBD_2362c	recO	-	FALSE	FALSE	FALSE	FALSE	4.40005	-0.194767	3.23222	-2.92395	-1.90941	1.38823	-2.92102	-2.9187	2.73675	-1.91345	3.2434	3.42257	-2.93224	1.84711	-2.93153	-1.91021	1.64077	-2.92402	-2.91986	2.45015	-2.91407	3.18192	3.98681	-2.90497	-2.91194	2.03061	-2.91579	2.94799	1.38823	4.45126	1.30451	-1.91168	2.06901	-1.90135	3.76002	-2.93186	-2.91773	2.32315	3.27948	-2.9087	2.8657	2.94153	1.28623
RVBD_2609c	Rv2609c	-	TRUE	TRUE	TRUE	TRUE	-1.7766	-1.68621	-2.18948	-1.70708	-1.17702	-1.76867	-1.69359	-1.29728	-1.78506	-0.568235	-1.21195	-1.10544	-2.86271	-1.65074	-1.24904	-1.41589	-1.61551	-1.1143	-1.69534	-2.06314	-1.87666	-2.17166	-1.56655	-2.07843	-1.83014	-2.24316	-1.59775	-1.74715	-1.76867	-1.78095	-1.81762	-1.83433	-2.01724	-0.787221	-1.28587	-1.44532	-2.29581	-1.56453	-2.45292	-1.96832	-2.04678	-2.0249	-1.98526
RVBD_0098	fcoT	mod01	TRUE	TRUE	TRUE	TRUE	-3.04905	-2.29984	-1.43476	-0.596843	-0.765937	-2.94042	-1.64306	-2.50137	-1.191	-9.83594	-1.73811	-1.76665	-2.0196	-4.04889	-0.889432	-0.661552	-2.03042	-0.559591	-2.9317	-2.2928	-1.68344	-2.14203	-2.34662	-3.10889	-1.59337	-5.42885	-2.14831	-2.02485	-2.94042	-4.72214	-2.4056	-0.490625	-1.53731	-0.928218	-1.16213	-2.65565	0.113822	-1.85151	-2.54217	-1.74958	-4.09027	-1.60573	-1.78092
RVBD_0767c	Rv0767c	mod06	TRUE	FALSE	FALSE	FALSE	-1.55714	-0.678825	-1.44715	-0.321913	-0.420267	-1.5808	-2.04979	-0.387103	-0.609728	-1.28946	-1.14725	-0.510132	-0.308593	-0.425518	-0.817852	-2.9543	-1.28891	-0.618405	-0.567496	-0.283755	-0.479381	-0.449908	0.137004	-0.311105	-0.435143	-0.561233	-0.961203	-0.820094	-1.5808	-0.850849	-0.702627	-1.777	-0.594149	-0.933844	-1.36648	-1.52119	-1.02075	-1.21768	-1.50123	-0.778729	-1.17597	-0.815362	-1.56055
RVBD_0472c	Rv0472c	mod05	TRUE	TRUE	TRUE	TRUE	-0.836801	-1.94103	-1.51357	-3.12215	-1.82861	-3.87817	-0.751727	-1.01292	-2.12611	-9.20037	-1.26442	-0.955994	-2.51319	-5.03486	-2.87572	-3.38789	-3.6865	-10.2046	-2.09986	-0.975637	-2.02094	-2.63507	-2.47096	-1.25001	-2.51395	-1.99702	-3.27541	-3.36273	-3.87817	-5.79467	-2.45427	-3.32405	-2.39465	-1.3818	-3.52255	-1.13112	-5.49903	-4.36874	-4.66381	-2.62038	-4.18444	-4.18909	-2.13227
RVBD_2752c	Rv2752c	mod06	TRUE	FALSE	FALSE	FALSE	-0.951722	0.146205	-0.798476	0.056019	-0.176806	-0.511516	-1.27756	0.782932	0.376749	-1.46973	-1.07551	-0.798551	-0.00738688	-1.59953	-1.70383	-1.87027	-1.2196	-1.67798	-0.678924	0.641879	-0.227887	0.540001	-0.143886	-0.198397	-0.224862	-0.281959	-0.355588	-0.241859	-0.511516	-0.758409	-0.262367	-0.143534	-0.0488367	-1.47015	-0.0768008	0.394776	-0.240434	-0.0666532	-0.594455	-0.106744	-0.972511	-0.197076	-1.09285
RVBD_1244	lpqZ	mod18	TRUE	FALSE	TRUE	FALSE	-0.716827	-0.787929	-1.21142	-1.09287	-0.281986	-1.29364	-0.490004	-0.935438	-0.707491	-1.7686	-1.13373	-0.545056	-0.935874	-0.629322	-0.75087	-0.337754	-1.49225	-0.556066	-1.70471	-1.5535	-0.954291	-1.30847	-2.48607	-0.514469	-0.998927	-1.2819	-1.00804	-1.24845	-1.29364	-1.06686	-2.03966	-1.53954	-1.83768	-1.0497	-1.16837	-1.24165	-0.193099	-0.959804	-1.02401	-0.612396	-0.534244	-0.413414	-0.0549765
RVBD_1206	fadD6	mod02	TRUE	FALSE	FALSE	FALSE	-0.227023	-0.275568	-0.692901	-0.241228	-0.763192	0.3883	-0.818507	0.313279	-0.392799	0.387788	-0.526809	-0.274814	-0.643239	-0.774313	-0.608109	-0.195383	-0.0498765	-0.0885569	-0.264146	0.295112	-0.162199	0.0589698	-0.103794	-0.261041	0.129025	0.0518882	0.0444256	-0.0886101	0.3883	-0.37329	-0.0355273	-0.120194	-0.298227	0.31251	0.366235	0.477482	0.24473	0.0798033	0.432343	0.403051	0.791023	-0.700545	0.15333
RVBD_0260c	Rv0260c	mod20	F	F	F	F	0.705881	0.692947	0.307813	0.493197	-0.734655	0.267858	1.11483	-1.30334	-0.303819	-0.991096	1.10604	1.30298	0.412268	0.791135	-0.532495	1.12541	-2.02978	-0.367681	0.647262	0.944236	0.752053	0.527634	0.861634	-1.61179	0.506571	-0.210725	0.363042	-0.242304	0.267858	0.810464	-0.533274	0.209999	0.359892	1.23626	0.34658	-0.0387218	1.22307	0.727289	0.103822	0.206178	-0.176776	0.33792	-0.0745462
RVBD_1286	cysN	mod13	FALSE	FALSE	FALSE	FALSE	2.66269	1.1176	1.15529	0.963963	2.92213	-0.305369	1.44474	2.47774	4.04445	-4.5452	2.7584	3.12768	-5.55463	0.38727	-1.42185	-4.53787	-1.54356	1.58438	0.889813	0.101518	-2.31152	1.3392	3.32443	0.640235	-5.52844	3.07355	3.07239	0.502912	-0.305369	3.11712	-0.77152	1.64494	1.94735	-4.52324	1.77574	2.01839	2.33374	3.63	3.82436	3.41085	3.73544	2.94	3.26225
RVBD_3270	ctpC	mod15	FALSE	FALSE	FALSE	FALSE	1.97381	2.6364	2.83241	2.12832	-3.67206	1.8572	4.33448	1.50411	5.04227	-3.68595	1.94484	2.07516	0.443308	2.64285	0.408204	-3.66866	3.85656	0.294189	2.29981	1.81823	3.18113	1.95402	3.27655	3.50525	0.182839	3.26525	2.24746	2.53083	1.8572	5.26439	2.97574	1.62936	4.05956	-3.67089	2.65462	2.73061	0.602529	2.94236	2.82577	-0.502588	-0.463035	1.63276	3.16107
RVBD_1492	mutA	mod19	TRUE	TRUE	TRUE	FALSE	-0.50031	-1.69075	-0.818474	-0.502042	-0.83529	-1.36623	-0.177139	-1.7036	0.361757	-4.24789	-0.893129	-0.307689	-0.71366	-0.989824	-0.218416	-1.04306	-1.46954	-0.455374	-0.756946	-0.428796	-1.01383	-0.403234	-1.09945	-0.978542	-0.309713	-0.575255	-0.0876925	0.04313	-1.36623	-1.58912	-1.52706	-1.60037	-0.696159	-0.616741	-0.900077	-2.17018	-0.18431	-0.906639	-1.28647	-0.75744	-1.49958	-0.438527	-0.978113
RVBD_3500c	yrbE4B	mod16	TRUE	TRUE	TRUE	TRUE	-1.30498	-1.3464	-1.00785	-1.23448	-1.04548	-1.25218	-0.669995	-1.27275	-0.399372	-0.882069	-0.644169	-0.517348	-1.37377	-2.14025	-0.652248	-1.12646	-1.28638	-1.18987	-1.7027	-1.86366	-1.27312	-1.74201	-1.59464	-0.815622	-1.25937	-1.12021	-1.7441	-1.52484	-1.25218	-1.2982	-1.06611	-0.869448	-1.49974	-1.58563	-1.07596	-1.22932	-0.619328	-1.40995	-1.34372	-1.67686	-1.53716	-1.35296	-1.40287
RVBD_1019	Rv1019	mod20	TRUE	FALSE	TRUE	FALSE	-1.0794	-0.777875	-0.977587	-0.36356	-0.712165	-2.1905	-0.845942	-0.601843	-1.2016	-4.7196	-0.900511	-0.358736	-0.51898	-1.44133	-0.49685	-2.4429	-0.409643	-0.732304	-0.99813	-0.940672	-0.151294	-0.396813	-0.525874	-1.28731	-1.05798	-0.488558	-2.32198	-2.06761	-2.1905	-2.20454	-1.48318	-1.29563	-1.13758	-1.79175	-0.14747	-0.864801	-1.25408	-1.57742	-2.68533	-1.68844	-2.07435	-1.63715	-1.83618
RVBD_1626	Rv1626	mod02	TRUE	FALSE	TRUE	FALSE	1.49098	0.298479	0.10852	-0.97132	0.346634	-0.529358	0.0544568	0.23106	0.498135	0.716358	-1.03997	-0.876397	-1.78817	-2.61997	-0.961434	0.83906	0.253583	0.312172	-0.378012	1.90205	-0.244879	-0.648468	-0.21465	1.17907	0.116593	0.0219899	-0.410677	-0.4902	-0.529358	-0.742991	0.419645	1.1208	-0.12543	-0.313662	0.643671	1.33374	0.471748	0.236652	-0.172389	0.336093	-0.26941	-0.289646	-1.12158
RVBD_0391	metZ	mod20	TRUE	TRUE	TRUE	TRUE	-1.23706	-1.67922	-1.78857	-1.58423	-1.55077	-1.38126	-1.3419	-1.53856	-1.17958	-1.72228	-1.02352	-0.498042	-1.82913	-1.41815	-0.935923	-1.2512	-3.67942	-2.12686	-0.849839	-2.33411	-1.80825	-1.59696	-1.53875	-1.71707	-1.0514	-1.01479	-0.962948	-0.956089	-1.38126	-1.0557	-0.766708	-0.924341	-1.03605	-0.350404	-1.34834	-1.59064	-1.06136	-1.00748	-1.16472	-1.35285	-0.846028	-1.47934	-2.19613
RVBD_1345	mbtM	mod05	TRUE	FALSE	TRUE	FALSE	-0.391637	-0.182379	-0.41759	-0.291699	-0.171856	-0.685469	-0.306016	-0.16286	-0.0495961	-0.134973	-0.566561	-0.577951	-1.32914	-1.16673	-0.385775	-1.41617	-0.0557122	-0.230116	-0.229364	-0.175717	-0.0903207	-0.307871	-0.52771	0.0804961	-0.350131	-0.0830737	-0.651871	-0.0713677	-0.685469	-1.33146	-0.50622	-0.208461	-0.349644	-0.957186	0.0552347	-0.460918	0.158943	-0.317961	-0.110213	-0.631073	-0.418674	-0.586794	-0.315842
RVBD_1589	bioB	mod07	TRUE	TRUE	TRUE	TRUE	-11.7857	-6.14982	-7.58559	-11.7895	-4.55404	-4.41493	-1.81289	-5.60021	-3.90801	-10.7895	-1.20061	-0.805245	-5.31416	-11.7891	-11.7976	-10.7832	-11.7872	-7.44108	-11.7909	-11.7809	-11.7857	-11.7889	-11.7977	-11.7708	-11.7781	-11.7769	-11.7785	-5.78237	-4.41493	-5.17392	-11.7871	-10.7741	-6.32056	-10.7708	-4.23481	-11.7948	-11.7914	-11.7774	-6.57287	-11.7842	-11.779	-5.68456	-6.08109
RVBD_0805	Rv0805	mod04	TRUE	FALSE	FALSE	FALSE	2.83159	0.256552	-0.322623	0.37264	-0.999228	0.993235	2.0723	1.74686	1.47553	-2.26335	1.13349	0.768472	-0.972882	0.342495	-1.99921	0.0818147	0.855811	0.599024	1.40499	2.98631	0.140714	0.699162	0.864587	0.308559	0.981161	1.01167	1.46362	1.06571	0.993235	-0.821577	1.17241	2.09269	1.36245	-1.96916	0.84839	0.688485	-1.33798	1.10376	1.99315	1.39142	0.994746	1.98564	1.12139
RVBD_1239c	corA	mod18	FALSE	FALSE	FALSE	FALSE	0.664582	0.303508	0.760683	0.108137	-0.707032	1.73228	0.688617	0.396907	0.612882	1.54853	0.61418	0.754329	-0.00618613	0.182468	0.202011	1.69974	1.20078	1.58419	0.972191	0.267293	-0.0249239	0.324859	0.0357395	0.457485	0.167613	-0.735433	0.414167	0.50654	1.73228	0.297437	0.333756	0.760429	-0.183407	0.618134	0.885864	1.39241	-0.058241	1.3869	1.56851	1.42143	1.40057	0.372775	0.660764
RVBD_3614c	espD	mod03	TRUE	TRUE	TRUE	TRUE	-2.93108	-1.98321	-2.77424	-0.960761	-2.71637	-1.89062	-1.82672	-3.1997	-2.73945	-2.27027	-1.33478	-0.412444	-4.69273	-1.25959	-1.34462	-5.7926	-6.50893	-2.80517	-2.50989	-3.33029	-2.42919	-2.49976	-5.98324	-4.20628	-4.14409	-6.11793	-3.82088	-3.07195	-1.89062	-2.27731	-3.44483	-1.92068	-2.52103	-5.40245	-1.43284	-2.08767	-2.27057	-3.94968	-4.32209	-3.84689	-5.19109	-3.25257	-2.79594
RVBD_2792c	Rv2792c	mod05	F	F	F	F	-0.123585	0.977516	0.622114	0.475955	0.0852295	0.688651	0.591185	1.08572	-0.216932	1.78257	1.24296	1.6607	0.798413	-0.562541	-0.768803	-3.50686	1.07228	1.60387	-0.454085	-0.0176374	0.0677855	0.974109	-0.2926	-1.61152	0.611782	1.08421	1.47144	0.191099	0.688651	-0.428311	0.889967	0.57176	0.832672	-0.781241	-1.46552	0.648634	-8.78919	0.317845	0.244063	1.24342	0.341538	0.520808	1.04538
RVBD_1846c	blaI	-	TRUE	TRUE	TRUE	FALSE	-1.30874	-0.742683	-1.32809	-1.45307	0.332377	-1.44039	-1.34241	-1.09404	-0.611669	-1.86927	-0.778802	-0.930087	-1.01092	-0.306273	0.322958	-0.103603	-0.535114	-0.550715	-1.09345	-0.455676	-0.219088	0.105659	-0.207871	-0.41735	-0.473254	-1.01729	-0.784285	0.149828	-1.44039	-0.547753	-0.705707	0.157706	-0.507874	0.735511	-0.923335	-1.3285	-1.19539	-0.772877	-0.732048	-0.807911	-0.645185	-0.834074	-1.5859
RVBD_3429	PPE59	-	FALSE	FALSE	FALSE	FALSE	-0.0846172	0.22419	0.227887	-0.0831895	0.535845	0.089659	0.307808	-0.175116	-0.436287	0.616396	0.613739	0.510923	0.0154912	0.390264	0.00486599	0.527247	-0.128299	-0.347205	0.106297	-0.201253	-0.0534615	0.14451	-0.291283	-0.0515362	0.142327	0.275279	0.292211	0.266776	0.089659	0.418801	0.145096	0.154098	0.0692231	-0.0116404	-0.157659	-0.527665	-0.529995	0.153175	0.0763536	0.0148	0.207895	0.107818	0.235791
RVBD_3497c	mce4C	mod16	TRUE	TRUE	TRUE	TRUE	-1.43838	-1.56349	-0.971781	-1.04691	-1.55547	-1.39951	-0.3281	-0.927922	-0.380076	-1.61423	-0.708428	-0.596846	-1.77131	-2.95282	-1.47268	-0.50643	-1.30357	-0.408693	-1.96567	-1.56147	-1.22321	-1.80867	-2.0497	-1.08878	-1.07618	-1.73792	-1.61937	-1.66757	-1.39951	-2.29684	-1.30778	-1.73328	-1.74616	-1.19134	-1.39019	-1.70559	-1.18701	-1.29355	-1.88708	-1.94842	-1.98635	-1.45201	-1.71279
RVBD_3696c	glpK	mod20	TRUE	FALSE	FALSE	FALSE	0.877811	0.62369	1.62234	0.159246	0.475156	2.01601	1.46312	1.00085	0.519138	-0.478567	0.561097	0.686543	-2.17934	-2.10539	-1.19938	-0.836702	-0.918339	-1.1741	1.91656	0.791893	0.601026	0.465331	0.0134358	0.76989	0.983685	0.548909	1.22646	0.145155	2.01601	0.618756	0.614319	0.690824	1.00349	-0.0214598	0.474003	0.342079	0.804197	1.20432	1.72624	1.93125	1.95989	1.30339	1.65189
RVBD_3922c	Rv3922c	mod20	FALSE	FALSE	FALSE	FALSE	-2.60513	1.727	-0.218644	2.14953	-0.00749298	1.52861	0.709612	-1.05416	1.80851	-6.244	2.16276	2.74586	1.88283	1.5997	-7.25089	-6.2358	2.20503	1.59238	0.593425	-0.486522	-0.624826	0.489698	1.08827	0.405454	2.62733	2.0415	-0.273311	-0.440501	1.52861	-0.776824	-1.10427	0.493952	-0.154205	0.89178	1.22614	-0.44169	-0.395558	-1.01364	-1.13387	-0.399554	0.181079	0.147879	1.05102
RVBD_0464c	Rv0464c	-	TRUE	FALSE	FALSE	FALSE	-0.741571	-0.667785	-1.05672	-1.10201	-1.3905	-1.42835	-0.799323	-0.832554	-0.93462	-1.4961	-0.758982	-0.643168	-0.282837	-0.6151	-0.763478	-1.43344	-0.684295	-0.830743	-0.608088	-0.696346	-0.362941	-0.502071	-1.02378	-0.986421	-0.333065	-1.0422	-0.858779	-0.604658	-1.42835	-0.987306	-0.416875	-1.18262	-0.769636	-0.544297	-0.54352	-1.23811	-1.08963	-0.655609	-1.12049	-1.07225	-1.2613	-0.658353	-0.698888
RVBD_3534c	hsaF	-	TRUE	TRUE	TRUE	FALSE	-1.33569	-1.18341	-0.819559	-0.884962	-1.38567	-0.919924	-0.885322	-1.21497	-1.26568	-1.78002	-1.09392	-1.00346	-1.34248	-1.85265	-1.21921	-2.06736	-0.831339	-0.914555	-1.1802	-1.00398	-0.36798	-1.33094	-0.369937	-0.52342	-0.57047	-0.892642	-1.10729	-0.562348	-0.919924	-0.84305	-0.991459	-0.251256	-0.797446	-0.556954	-0.666052	-0.613574	-0.30053	-0.825503	-1.18051	-1.29376	-1.13405	-0.915174	-1.13334
RVBD_3825c	pks2	mod08	TRUE	FALSE	TRUE	FALSE	-0.0312924	-0.0356724	0.0113136	0.0785928	-0.00340629	0.237291	-0.10855	-0.127347	-0.0977072	-0.360368	-0.233511	-0.0465817	-0.456185	-0.373319	-0.324353	-0.134815	-0.300823	-0.264724	0.061982	-0.0451791	-0.224583	-0.359886	-0.236737	0.0240077	-0.280455	-0.0676598	0.0340413	0.060722	0.237291	0.208921	-0.0544996	0.0804457	0.0624245	-0.179362	0.0728549	0.0402149	-0.0634927	0.211298	0.119067	0.0147717	-0.121291	0.0815592	-0.131992
RVBD_3197	Rv3197	-	TRUE	TRUE	FALSE	TRUE	-0.890992	-1.31216	-1.44003	-0.940711	-0.820407	-1.17134	-1.12728	-0.446499	-1.37023	-1.08752	-0.739188	-0.408753	-0.635879	-1.05094	-1.377	-1.33754	-1.04706	-0.72864	-1.03081	-0.801998	-0.75314	-1.2507	-0.777117	-1.05342	-1.04639	-1.13862	-1.22358	-0.594008	-1.17134	-0.772558	-0.588063	-0.58011	-1.05098	-1.65146	-0.765529	-0.573301	-0.650809	-1.13096	-1.04152	-1.27641	-1.38804	-1.23071	-1.42143
RVBD_3553	Rv3553	mod05	TRUE	TRUE	TRUE	TRUE	-2.18261	-1.74097	-1.6386	-0.901392	-0.934696	-2.40384	-0.397478	-1.77863	-0.614223	-0.726477	-0.974273	-1.10302	-3.75379	-4.58227	-0.657978	-5.63337	-3.13718	-5.43383	-1.50877	-2.87858	-2.11533	-2.26682	-1.53027	-1.74136	-1.56988	-1.15437	-2.32252	-1.75782	-2.40384	-1.10771	-2.74445	-1.49243	-2.47709	-4.28037	-1.50985	-1.13645	-3.72884	-2.05924	-3.10684	-2.62141	-2.79437	-1.23359	-1.36438
RVBD_0296c	Rv0296c	mod11	TRUE	TRUE	TRUE	TRUE	-0.565115	-0.87506	-1.46974	-0.815742	-1.21748	-0.730147	-0.847485	-0.907946	-0.682022	-0.92492	-0.543024	-0.300029	-0.287561	-0.615832	-0.521079	-0.461898	-1.61492	-0.759915	-0.946814	-1.35938	-0.759394	-0.955521	-0.705593	-0.351181	-0.57191	-0.522877	-0.721428	-0.891407	-0.730147	-1.10857	-0.979195	-0.727027	-0.800541	-0.149786	-0.781267	-0.690096	-1.08666	-1.02459	-1.30299	-1.1697	-1.19933	-1.01227	-1.57689
RVBD_2335	cysE	-	FALSE	FALSE	FALSE	FALSE	4.38269	3.35407	2.20242	2.89013	3.73048	5.08826	4.0113	3.2701	-4.17387	5.13922	3.05948	2.90719	1.67556	-4.21693	1.61471	5.61396	-4.20816	1.72064	2.97194	2.68422	2.92856	2.56209	2.76707	-4.18006	2.58857	4.12214	1.97918	2.66958	5.08826	5.30389	3.8444	4.91606	3.10733	4.91762	-4.17193	3.00315	-4.20822	3.06166	3.8549	2.27017	2.67717	2.6232	2.22438
RVBD_2788	sirR	-	TRUE	FALSE	FALSE	FALSE	-0.392908	-0.691696	-0.669308	-0.481105	-0.828793	-0.30406	-0.549815	-0.796359	-0.807695	-0.637179	-1.19001	-0.822177	-0.243315	-0.750093	-0.829472	-0.702055	-2.0121	0.224676	-0.515705	-0.361591	-0.644873	-0.477242	-0.570263	-0.0841127	-1.135	-0.455539	-0.0687572	-0.0728203	-0.30406	0.400889	0.0764337	-0.184803	-0.238118	0.0467707	-0.649284	0.389876	-0.472253	0.0802718	-0.00268819	0.182857	0.107071	-1.03955	-0.721841
RVBD_3400	Rv3400	mod12	TRUE	TRUE	TRUE	TRUE	-2.33297	-2.60267	-3.5572	-3.19871	-1.72208	-2.25657	-1.50093	-1.52702	-1.63309	-10.344	-1.3399	-0.452061	-3.47983	-3.75365	-1.92813	-2.86179	-2.34216	-1.44464	-7.09916	-6.54324	-3.39709	-2.57546	-2.54056	-4.16927	-2.2174	-4.95639	-2.56796	-3.45245	-2.25657	-4.15504	-3.27882	-1.12133	-3.81407	-0.98569	-4.66577	-2.78314	-2.52861	-3.18556	-3.72709	-3.58577	-3.10778	-3.08225	-4.27581
RVBD_2605c	tesB2	mod20	TRUE	FALSE	TRUE	TRUE	-4.75382	-1.50629	-1.10956	-3.63044	-0.914362	-1.50421	-0.953891	-1.65143	-2.82034	-0.964445	-1.55979	-1.56493	-1.3042	-2.19387	-5.53322	-5.74376	-1.40648	-2.59851	-1.96514	-2.76714	-2.4607	-2.78265	-7.68269	-2.8753	-1.84059	-5.10769	-1.27118	-2.22127	-1.50421	-1.3992	-2.06838	-2.65991	-1.51122	-3.40621	-1.23174	-1.904	-1.63987	-1.1043	-1.48825	-1.88384	-2.21993	-1.38525	-1.86561
RVBD_0620	galK	-	F	F	F	F	0.236734	-0.473729	0.340657	-0.697484	0.994529	1.43103	-1.75375	0.106124	0.803959	2.32485	1.93152	1.36554	1.48376	0.777604	0.233625	1.81761	1.23889	0.695522	0.0812305	0.380882	-0.183559	-1.79348	2.02798	-0.691331	-2.05692	-8.2136	0.723998	-0.260652	1.43103	0.564887	0.562604	-0.856177	0.743379	-7.20617	-0.0509799	-0.3945	-0.064534	0.53935	0.483948	0.530636	0.307661	0.852262	0.574269
RVBD_2633c	Rv2633c	-	FALSE	FALSE	FALSE	FALSE	-0.473474	-0.224644	-0.213288	-0.338338	-0.497463	-0.410197	-0.933244	-0.381222	-0.218979	-0.0963657	-0.840386	-0.791001	-0.402936	-0.268365	-0.123748	-0.726925	-0.365273	-0.434094	-0.672507	-0.101362	-0.530936	-0.37217	-0.689993	-0.27632	-0.343917	-0.332962	-0.278364	-0.523333	-0.410197	-0.508872	-0.487522	-0.299067	-0.35936	-0.445796	-0.149992	-0.416009	0.245957	-0.430222	-0.405724	-0.341085	-0.507468	-0.487602	-0.392282
RVBD_2790c	ltp1	-	FALSE	FALSE	FALSE	FALSE	0.388609	-0.236837	-0.21391	-0.314197	-0.0342255	-0.278337	0.473696	-0.453901	0.0615603	-0.314541	0.88903	0.324819	0.448813	0.641329	0.125777	-1.19498	-0.342671	0.0253152	-0.0444898	-0.229091	-0.00999013	-0.427389	0.354331	-0.0331311	-0.633921	-0.566328	-0.511509	-0.0575619	-0.278337	0.42833	-0.13795	-0.140154	-0.284601	0.118118	-0.660955	0.249155	-0.00856464	-0.712132	-0.107061	-0.119659	-0.141897	-0.32312	0.158286
RVBD_1065	Rv1065	-	TRUE	FALSE	TRUE	FALSE	-0.380701	-0.620729	-0.516802	0.159388	-0.381117	-1.25501	-0.357038	-1.2446	-0.361582	-0.436098	-0.682264	-0.718281	-0.943396	-0.352422	-0.0378851	0.262221	-0.414799	-1.08258	-0.736552	-0.335572	-0.50709	-0.498523	-0.454997	-0.45475	-0.671477	-0.184005	-0.438171	-0.0983955	-1.25501	-1.13205	-0.141826	-0.0164517	-0.34179	-0.586673	-0.74595	-0.412999	0.190977	-0.475544	-0.659028	-0.841812	-0.503678	-0.703025	-0.969113
RVBD_3535c	hsaG	-	TRUE	TRUE	TRUE	TRUE	-0.683412	-0.892586	-0.933668	-0.366196	-1.14252	-1.10874	-0.448342	-0.786912	-0.711233	-0.555953	-0.789028	-0.76182	-0.872742	-1.60285	-0.768472	-1.72689	-1.64431	-0.797901	-1.01694	-1.24782	-0.798031	-1.16006	-0.686368	-0.675797	-0.625306	-0.583146	-0.903877	-0.718376	-1.10874	-1.29427	-1.12455	-0.736341	-0.848007	-0.291502	-0.550181	-0.859879	-0.426004	-1.03046	-1.46348	-1.30486	-1.33902	-1.16388	-1.35015
RVBD_3495c	lprN	-	TRUE	TRUE	TRUE	TRUE	-1.00396	-1.51186	-0.837855	-0.945501	-1.3232	-1.20428	-0.725414	-0.768797	-0.977957	-0.368656	-0.809486	-0.588514	-1.65268	-1.36695	-1.5816	-1.09164	-0.736795	-0.565152	-1.63353	-1.16831	-1.34696	-1.84187	-1.30663	-1.61625	-1.15828	-0.95732	-1.61396	-1.48278	-1.20428	-1.20247	-1.15618	-0.536677	-1.33212	-0.18752	-0.63645	-1.25738	-1.5816	-0.978939	-1.19465	-1.46997	-1.65951	-1.42634	-1.22891
RVBD_0222	echA1	mod06	TRUE	FALSE	TRUE	FALSE	0.933721	-0.501617	0.104272	0.425699	0.230309	0.444313	0.214046	-0.882001	0.565312	0.656324	1.22764	1.25866	0.326625	0.842059	-3.10354	-0.718946	1.27671	0.636364	0.268016	0.450957	-0.307142	-0.298737	0.546376	0.054766	0.672204	-0.129093	0.434984	0.172192	0.444313	-1.19975	0.159057	0.551622	-0.60702	-1.07692	-0.942408	0.255647	-0.313095	0.0231024	0.471045	0.592396	0.644866	-0.437174	0.538942
RVBD_0009	ppiA	-	TRUE	FALSE	TRUE	FALSE	-0.875586	-0.856747	-0.402264	-1.31366	-1.19044	-0.482411	-0.485196	-1.66571	-0.419785	-3.25876	-0.837595	0.141058	-0.284888	-0.400998	-0.756415	-3.03949	-0.414202	-1.33695	-0.489555	-0.439127	-0.056636	-0.886285	-0.0474802	-0.17811	0.185694	-0.105505	-0.796796	-0.351916	-0.482411	0.0157891	-1.16133	-0.74018	-0.815094	-0.783995	-0.0115697	-0.333183	-0.056818	-0.393694	-0.152171	-0.644257	-0.687508	-1.35696	-0.889051
RVBD_2428	ahpC	mod13	TRUE	FALSE	FALSE	FALSE	-0.371279	1.11553	-0.195068	3.38998	1.25512	1.09718	1.01943	-0.511016	2.09007	-6.98948	1.52852	2.38346	-0.623487	-7.98868	-7.99569	-6.98303	0.541416	-0.749659	0.923217	0.748664	0.267723	0.0612697	-0.139051	-0.0916188	1.26527	1.21604	0.2337	0.285184	1.09718	0.834469	-0.135387	0.0960695	0.244707	0.3772	-0.807382	0.809108	-2.49663	0.638869	0.0336308	0.196134	0.809529	1.15479	0.599325
RVBD_2134c	Rv2134c	-	F	F	F	F	0.925488	0.355053	-0.0505322	0.510326	1.36698	0.0472632	1.42083	0.804943	1.30587	-8.31743	1.15517	1.53489	0.0580548	-0.310252	-0.499481	1.05698	0.94881	0.497249	1.36329	0.983996	0.12791	0.435664	-0.789239	0.16256	0.160664	0.878362	-0.27705	0.116915	0.0472632	0.342141	0.078405	0.0198606	-0.0393684	-2.68665	0.497183	0.489459	0.547449	-0.193163	0.102785	-0.322165	-0.0165581	0.258773	0.000919805
RVBD_2604c	snoP	-	TRUE	TRUE	TRUE	TRUE	-9.34606	-5.3689	-4.02428	-9.3522	-8.33007	-4.14069	-1.03283	-3.1622	-5.21563	-8.35396	-2.07408	-2.65574	-5.38719	-9.35271	-9.36156	-8.34647	-9.35183	-9.35692	-9.35293	-1.23349	-5.18808	-9.35227	-9.35506	-9.33555	-9.34047	-4.41017	-2.47898	-2.07968	-4.14069	-2.48399	-9.3504	-8.33994	-3.87134	-8.33571	-9.34021	-2.61714	-9.354	-9.33972	-9.34349	-6.09382	-9.34665	-6.00562	-4.62278
RVBD_3024c	trmU	-	FALSE	FALSE	FALSE	FALSE	3.02126	0.356138	2.56725	-4.27939	1.95998	1.73852	2.27907	1.90008	3.59665	-3.28681	2.55547	1.8648	0.0575862	-4.29463	-4.29138	-3.27538	-4.28633	-4.28937	-0.0315498	-4.27645	-0.124685	-4.28249	-4.29342	-4.26708	-4.28168	-4.26029	-0.449148	-4.28112	1.73852	-3.27027	0.669051	-3.26845	-4.28127	-3.26988	-4.264	0.0476876	-4.2885	-4.27513	4.75179	2.3409	0.574821	2.78135	2.09074
RVBD_0200	Rv0200	mod05	TRUE	FALSE	TRUE	FALSE	-0.973695	-1.72233	-2.88934	-2.43452	-3.80382	-1.73971	0.0851426	-2.36138	-1.05429	0.587134	-1.8103	-1.48539	-3.21754	-3.99698	1.32827	-4.77608	-1.36012	-0.0510714	-1.77035	-1.94925	-0.422911	-2.5931	-2.58459	0.137218	-3.26278	-2.62392	-2.49781	-2.28061	-1.73971	-2.6072	-2.52017	-3.93958	-2.24642	0.104078	-0.240882	-2.29263	-1.16071	-2.35357	-3.9458	-5.27722	-2.68823	-1.40023	-2.65311
RVBD_3574	kstR	mod06	TRUE	FALSE	FALSE	FALSE	-2.23195	-1.22348	-2.33638	-1.45762	-2.01631	-2.02524	-3.13678	-0.540681	-0.600835	-1.82576	-1.87461	-0.928814	-3.04237	-4.73795	-1.4384	-3.85964	-4.58806	-2.12459	-1.33465	-0.933496	-0.0761478	-0.744883	-1.08683	-0.995453	-1.59715	-0.908246	-2.16655	-1.4195	-2.02524	-0.445166	-1.32509	-1.21899	-0.770341	-8.12954	0.383726	-0.0173193	-1.2791	-1.42715	-1.67148	-1.46565	-2.25652	-1.13727	-1.64023
RVBD_3823c	mmpL8	mod17	TRUE	TRUE	TRUE	TRUE	-1.72371	-1.51392	-0.87735	-0.815535	-1.9864	-1.89351	0.238777	-1.12771	0.817525	-2.01952	0.578558	0.582711	-0.899398	-1.11462	-0.68302	-3.10695	-1.68174	-1.57988	-1.72639	-1.6728	-1.43053	-1.6727	-1.79741	-1.21527	-1.06313	-0.684631	-1.41027	-1.37233	-1.89351	-2.10452	-1.80088	-1.62829	-1.66747	-0.888969	-1.50907	-1.33517	-1.52032	-2.25708	-1.01829	-1.71225	-1.92515	-1.43813	-1.19782
RVBD_2857c	Rv2857c	mod13	F	F	F	F	-0.865336	-0.0180784	0.0824661	1.03685	0.504452	-1.50315	0.897189	-1.16994	0.180489	0.160642	1.15795	0.556515	-0.339668	-0.997818	1.7607	1.53101	-1.97876	-1.4892	-0.139206	-0.358495	-1.20316	-0.465817	-1.05677	-0.0760471	-0.576271	-1.1631	0.196026	-0.5072	-1.50315	-2.82957	0.0710967	-0.217065	-0.00654065	-1.77086	-0.253986	-0.448878	0.969925	-0.914602	-0.224654	-0.299875	-0.501186	-0.31316	0.258772
RVBD_3881c	espB	-	TRUE	TRUE	TRUE	TRUE	-0.919274	-0.745637	-0.710195	-0.749123	-1.181	-0.501639	-0.501194	-1.02352	-0.243011	-0.793634	-0.462677	-0.174923	-0.983774	-0.750445	-1.05443	-1.03413	-1.01178	-0.812473	-0.42033	-0.835277	-0.586407	-0.727046	-0.550614	-0.454614	-0.713906	-0.795195	-0.793892	-0.575747	-0.501639	-0.952018	-0.863713	-0.175838	-0.781777	-0.388268	-0.319343	-0.330163	-0.0946489	-1.07951	-0.745501	-1.05475	-0.884156	-0.913152	-0.941723
RVBD_3317	sdhD	-	TRUE	TRUE	FALSE	FALSE	0.418437	-1.22966	-0.758361	0.269831	-1.60465	0.24742	-1.23755	-0.931754	-1.71093	0.432739	-0.878226	-0.512939	-2.4887	-1.19638	0.121574	-0.10753	-0.388657	-0.0233649	-1.3958	-0.0282328	-0.702695	-0.323687	-0.779232	-0.062063	-0.0953097	-1.16616	-1.26871	-0.944995	0.24742	-1.19528	-0.350372	-1.33794	-0.808972	-0.412384	0.280779	-0.0254671	-0.623454	-0.607011	0.513353	0.0226909	0.257615	-0.352118	-0.36259
RVBD_2001	Rv2001	mod17	F	F	F	F	0.480212	0.950624	-0.205648	0.0127689	0.302364	-0.0324305	-0.261291	0.506405	0.674698	0.363407	0.889056	0.925219	0.171268	-0.434361	-1.44369	0.65845	0.302221	-0.42156	0.0973887	0.351996	0.137669	0.622694	0.433927	-0.439971	0.314152	-0.0606684	0.175852	-0.0361179	-0.0324305	0.383371	-0.204352	0.303485	0.189978	-0.348213	-1.14359	0.613594	-3.01195	0.535247	-0.447913	0.298837	-0.0981746	0.258924	0.39381
RVBD_0234c	gabD1	-	TRUE	FALSE	TRUE	FALSE	-0.153822	-0.216012	-0.210126	0.346696	-0.195656	-0.0226877	-0.0912803	-1.19622	-0.0436655	-0.81978	-0.720558	-0.744863	-0.746644	-0.370873	-0.136986	0.287426	-0.309686	-0.482394	-0.0728098	-0.197181	-0.255769	-0.274338	-0.951746	-0.814878	-0.3557	0.214852	-0.0145601	0.0485914	-0.0226877	0.205528	0.0196216	-0.515528	0.0381558	-0.588425	-0.404239	-0.0717186	0.020497	-0.16393	-0.122213	-0.175081	-0.175334	0.248222	-0.32987
RVBD_1569	bioF1	mod06	TRUE	TRUE	TRUE	TRUE	-10.6691	-11.2632	-10.667	-10.6738	-9.65461	-2.49611	-1.73017	-3.19384	-2.69529	-3.35402	-1.36933	-1.08371	-6.29888	-7.14666	-10.6817	-9.66714	-10.672	-6.32497	-10.675	-10.6652	-6.50707	-10.6732	-10.6801	-10.6554	-6.74887	-10.6597	-5.29924	-5.90104	-2.49611	-3.48519	-10.6709	-9.65884	-10.6692	-4.04324	-10.6613	-10.6785	-10.6753	-7.28037	-6.10277	-7.4126	-10.6646	-10.6757	-6.49177
RVBD_0744c	Rv0744c	mod06	TRUE	FALSE	FALSE	FALSE	-0.512313	-0.091372	-0.188509	-3.0036	-7.79823	0.743677	-0.132265	-1.26354	-8.80642	-7.81715	2.31057	1.6702	-0.0812395	-8.81667	0.418475	-1.37872	-4.81591	-3.50508	-1.595	-0.63219	-0.212595	-1.64029	-0.357766	1.25705	-0.252365	-1.21828	-0.343643	-0.677282	0.743677	-1.21939	0.216539	-1.53532	-0.438818	-7.79828	-2.13994	0.0867734	0.207687	0.19529	0.0543398	-1.65149	-0.681482	1.76301	-0.813218
RVBD_1738	Rv1738	-	TRUE	FALSE	TRUE	FALSE	-0.674167	-0.259106	-0.41346	-0.457549	-0.198539	-1.17881	-0.53529	-0.708163	-1.4757	0.498081	-1.02982	-0.315735	-0.465232	-0.0287147	-0.0520839	-0.0211193	-0.933478	0.0504474	-1.0359	-0.435747	-0.261714	-0.0959879	-0.495094	-1.21374	-0.220846	-0.382821	-0.0504039	-0.832705	-1.17881	0.00857441	-0.288498	-0.683976	-0.452097	-2.63769	-1.72041	0.169018	1.33811	-0.671994	-0.0420957	0.171522	-1.11094	-0.571529	-0.899005
RVBD_1765c	Rv1765c	-	FALSE	FALSE	FALSE	FALSE	-0.203038	-0.0812437	0.147624	0.106938	0.0940564	0.10406	0.0280957	0.561999	0.216599	-0.373084	0.472231	0.368716	0.0212004	0.0693611	-0.0316496	0.189595	-0.438236	0.0739473	0.269265	0.187814	0.136323	0.101295	-0.112863	0.213085	0.290674	0.0122928	0.206084	0.167702	0.10406	0.532333	-0.0448223	-0.435655	0.0723194	-0.328431	0.115553	0.136009	-0.46463	0.104946	0.0929683	0.131041	0.0734223	0.0555418	0.223877
RVBD_1620c	cydC	-	FALSE	FALSE	FALSE	FALSE	-0.600125	-1.27936	-0.542745	-2.26609	-5.7781	-0.0227446	-0.0475322	-6.79254	-6.78567	0.529555	3.03838	2.90957	-4.21298	-1.36328	-6.80331	-5.78463	-2.7893	-1.31637	-0.894597	0.477981	-0.437224	-0.434413	-0.0619434	-6.77713	-1.6157	-1.8457	-0.0266728	-0.24554	-0.0227446	-1.84412	0.985815	0.656683	1.54085	-0.164073	1.64418	-1.09991	-6.79254	0.77013	0.917444	-1.48743	1.56144	0.302433	0.44715
RVBD_1235	lpqY	mod18	TRUE	TRUE	TRUE	TRUE	-1.73299	-1.33464	-1.6459	-1.62763	-1.20294	-2.68698	-0.473211	-1.2215	-0.952802	-3.00719	-0.741421	-1.18089	-2.08226	-1.66554	-1.58066	-4.4914	-1.66335	-1.88443	-1.48082	-1.43974	-2.00723	-2.04499	-3.08536	-2.41557	-2.36145	-2.32335	-1.34221	-1.40776	-2.68698	-3.1398	-1.79051	-1.70982	-1.0406	-1.2281	-1.97	-2.19703	-1.80499	-1.65152	-2.09957	-1.43409	-1.93517	-1.53179	-1.36948
RVBD_1432	Rv1432	-	FALSE	FALSE	FALSE	FALSE	-2.87583	-7.39892	-6.79953	-6.79404	-0.557156	-3.43334	-6.80334	-0.620249	-6.78045	-5.81047	-7.38908	-3.32071	-0.675837	-3.2873	-1.71217	-1.51973	-6.80775	-6.80465	-6.81667	-0.814454	-2.646	-1.78282	-6.81463	-6.78399	-0.185309	-6.77908	-3.47682	-1.25581	-3.43334	-5.78953	-1.60834	-5.78076	-2.97635	-5.79321	-6.78157	-6.80631	-1.11506	-6.79219	-6.80111	-6.80541	-1.43071	-6.8127	-2.30848
RVBD_0280	PPE3	-	TRUE	TRUE	FALSE	FALSE	-0.480388	-0.571062	-0.448297	-0.66194	-0.202813	-0.392059	-0.319633	-0.60525	-0.253721	-0.224979	-0.489401	-0.643925	-1.05968	-0.331432	-1.0133	-0.308282	-0.436769	-0.160845	-0.251615	0.0537571	-0.499708	-0.283681	-0.590648	-0.417035	-0.655869	-0.461097	-0.303631	-0.340698	-0.392059	-0.190566	-0.355986	-0.20996	-0.231344	-0.0298782	-0.393945	-0.751885	-0.202152	-0.518759	-0.511436	-0.48211	-0.481411	-0.314919	-0.463386
RVBD_0176	Rv0176	mod05	TRUE	FALSE	TRUE	FALSE	0.522268	-0.241389	-0.155993	-0.00578557	0.956806	-0.648547	0.700553	-0.863849	0.24955	0.391747	-0.682578	-0.743403	-2.53401	-1.73509	-0.00445788	-0.382061	-0.347747	-1.42664	0.115674	0.194168	0.661613	-0.311796	0.0404826	0.652807	0.144181	0.446967	-0.180049	-0.652883	-0.648547	-1.15106	-0.31299	0.55625	0.0794725	0.740717	0.460953	0.00437402	-0.759924	-0.169582	-0.93605	-1.12603	-0.556135	0.0659685	-0.143096
RVBD_2241	aceE	mod20	TRUE	TRUE	TRUE	FALSE	-0.981257	-1.98947	-0.65001	-1.49095	-3.07545	-0.605779	-0.96341	-0.413157	0.775666	-0.561832	-0.935772	-0.326883	-0.143342	-1.99727	-0.65527	-8.32296	-4.77145	-0.136124	-1.13213	-3.5567	-3.13734	-2.02391	-2.09883	-3.14547	-2.02459	-2.36406	-2.51052	-2.29044	-0.605779	1.32603	0.0502928	-0.846567	-1.38993	-2.69934	-2.65376	-5.80166	-2.35211	-0.236026	2.02551	0.820284	0.829301	0.760891	-0.608104
RVBD_0954	Rv0954	-	TRUE	TRUE	FALSE	FALSE	-0.269528	-1.35346	-0.622448	-0.91765	-0.0705102	-0.672566	0.11236	-0.469869	-0.0304467	-0.320832	-0.914489	-0.415806	-0.835903	-0.876404	-1.58937	-1.20051	-0.706032	-1.1738	-0.328612	-0.714659	-0.507342	-0.715122	-0.276171	-0.391793	-1.03982	-1.0745	-0.506323	-0.497213	-0.672566	-0.11626	-0.543916	-0.591473	-0.109992	-0.550231	-0.391161	-0.845661	-0.571576	-0.594235	-0.345966	-0.18286	-0.255695	-0.481599	-0.311196
RVBD_1551	plsB1	-	F	F	F	F	-0.177696	0.00148786	0.211795	-0.241749	-0.0923655	-0.0446683	0.484437	0.338765	0.974028	-0.376596	0.69763	0.447879	0.336326	-0.213675	-0.695173	-0.317226	0.012529	-0.0178368	0.141886	0.269253	-0.023737	0.387601	0.336566	-0.286994	0.286869	0.465399	-0.0939852	-0.0410537	-0.0446683	-0.508899	0.139267	-0.0158853	0.183678	-1.68648	-0.364602	-0.544648	0.204785	-0.144917	-0.175409	0.280067	0.228734	0.178625	0.0606382
RVBD_1323	fadA4	-	TRUE	FALSE	FALSE	FALSE	-0.567122	-0.259507	-0.633932	0.0144585	-0.664936	-0.402241	-1.06594	-0.51817	-0.629671	-0.151679	-0.577437	-0.306462	-0.198641	-0.376338	-0.202269	-0.213837	-0.347084	-0.36395	-0.279809	-0.674467	-0.483808	-0.400967	-0.627373	-0.411649	-0.327027	-0.349215	-0.11424	-0.0970129	-0.402241	-0.162704	-0.358216	0.00709926	-0.244395	-0.181856	-0.795669	-0.174234	-0.27936	-0.0239709	-0.308101	-0.341136	-0.447966	-0.379668	-0.462195
RVBD_1112	Rv1112	mod15	FALSE	FALSE	FALSE	FALSE	-0.189768	1.3272	1.56547	-1.32682	1.89238	2.29398	1.582	1.38708	0.405317	-5.16699	1.96645	2.51476	-0.663328	-0.766782	1.2413	-0.885229	3.18627	-0.690963	2.47911	0.8118	1.06057	2.36116	1.50279	2.12885	1.18635	1.46146	1.55875	1.48569	2.29398	2.19275	0.643873	2.01668	2.22807	-5.14969	3.57028	1.93637	1.24255	2.79018	1.44808	0.653832	1.325	1.97109	1.49477
RVBD_2131c	cysQ	-	FALSE	FALSE	FALSE	FALSE	-2.61187	-3.21309	-2.6256	-2.62584	-1.60471	-2.61573	3.62967	-2.62829	-2.62141	-1.61984	2.50186	2.18754	0.793598	-2.61805	-2.63255	-1.62058	-2.62516	-2.63083	-2.62078	1.2209	0.606497	-2.62177	-2.62115	-2.60521	-2.60698	-2.6122	-2.62337	-2.62022	-2.61573	-1.61534	-2.62222	-1.61641	-2.61799	-1.59447	-2.60545	-2.62939	-2.6227	-2.60664	-2.60746	-2.61492	-2.63109	3.08913	-2.62792
RVBD_2363	amiA2	mod20	TRUE	FALSE	FALSE	FALSE	-0.0892985	-0.631585	-1.07944	-1.0317	-2.86748	-1.45549	-0.286144	0.134226	0.777223	0.0897375	1.18604	1.11701	1.8091	-0.739327	1.48086	-0.369215	-0.793441	0.183753	-0.507258	-0.238927	-1.27824	-0.25244	-1.34783	0.0303293	-0.108212	-0.843317	0.15009	-0.86816	-1.45549	-1.0946	-0.164141	-1.45081	0.389335	1.17988	-1.09078	-2.08878	-2.64588	-1.07102	-2.34544	-0.710594	-1.33647	-0.0470414	-1.89198
RVBD_1058	fadD14	-	FALSE	FALSE	FALSE	FALSE	0.505454	0.536697	0.703006	0.203172	1.29464	-0.190503	1.10199	-0.403341	-0.189479	-0.47962	0.783946	1.21878	1.03205	1.47438	0.545011	0.351428	0.714503	0.257626	0.523345	0.420674	0.369866	0.552962	0.26739	0.176537	0.644028	0.510013	0.362697	0.455173	-0.190503	0.743763	0.280881	1.07664	0.558663	1.20947	0.508848	0.661295	-0.537764	-0.241712	-0.298477	-0.0554054	0.140177	0.653773	0.333137
RVBD_2127	ansP1	-	TRUE	TRUE	TRUE	FALSE	-0.485211	-0.523929	-0.559578	-0.31816	-1.02657	-0.44987	-0.430072	-0.592251	-0.509523	-0.59245	-0.463571	-0.327628	-0.946485	-0.790472	-0.488903	-0.551309	-0.913018	-0.659245	-0.601563	-0.84897	-0.558049	-0.935259	-0.531174	-0.577559	-0.718478	-0.594005	-0.426111	-0.315747	-0.44987	0.0424735	-0.481233	-0.645327	-0.475824	-0.0262669	-0.435546	-0.366882	-0.40404	-0.259354	-0.484146	-0.537421	-0.549921	-0.393578	-0.345111
RVBD_1130	prpD	mod05	TRUE	FALSE	TRUE	FALSE	-0.0571289	-0.0674744	-0.92718	0.16998	-0.212628	-1.02812	-0.803547	-0.0314007	0.0245662	-0.182779	-0.671634	-0.607817	0.0206972	-0.402973	-0.563348	-0.157589	-0.824686	-0.394988	-1.23457	-0.262082	-0.438305	-0.336712	-0.580147	-0.6236	-0.608979	0.0525732	-0.371342	-0.58232	-1.02812	-1.59858	-0.880489	-0.0309393	-1.01904	-0.0165281	-0.547744	-0.765893	-0.486026	-0.821828	-1.1916	-0.663662	-0.198007	-1.01675	-0.235065
RVBD_3193c	Rv3193c	mod04	TRUE	TRUE	TRUE	TRUE	-7.34255	-3.70105	-4.08147	-1.28392	-6.33908	-0.961681	-7.34689	-7.3543	-7.35144	-6.35254	-1.45922	0.0598856	-4.77473	-3.93273	-2.26872	-6.34638	-0.768958	-7.354	-7.35392	-3.50148	-0.931185	-3.50644	-0.0407505	-0.967894	-3.43338	-7.33437	-7.34969	-2.17142	-0.961681	-0.605431	-7.34969	-1.45829	-7.35042	-6.33811	-7.33802	-7.35851	0.44896	-2.10527	-3.09498	-4.09266	-2.50252	-3.13168	-4.94979
RVBD_0644c	mmaA2	mod12	TRUE	FALSE	FALSE	FALSE	0.396962	0.0723647	0.700673	-0.0294997	-0.0193911	0.190467	0.561058	0.203001	0.975312	0.658706	0.464163	0.535027	0.214958	-0.00814994	-0.0814681	0.323362	0.811401	0.172336	0.0739256	0.732344	-0.105798	-0.398028	-0.384949	0.480291	0.203352	0.636507	0.203031	-0.075536	0.190467	-0.67015	0.0478454	0.235643	0.0387082	0.32972	0.283668	0.535482	-0.0138923	-0.23053	-0.139657	-0.143778	0.0760427	-0.136176	0.11471
RVBD_1681	moeX	-	F	F	F	F	-0.501628	0.0219477	-0.327685	-0.304846	-0.262593	-0.284874	-0.627632	0.0554374	-0.674897	-0.430396	-0.50263	-0.19862	-0.364203	-0.0552351	-0.900557	-0.252334	-0.0509727	-0.127998	-0.426882	-0.149829	-0.186282	-0.0997472	-0.362385	-0.372014	-0.1293	-0.204429	-0.365873	-0.264503	-0.284874	0.270378	-0.0334673	0.0133231	-0.0751606	-0.887707	0.19734	-0.270971	-0.00707428	-0.111891	-0.148569	-0.163249	-0.404155	-0.404492	-0.226745
RVBD_3493c	Rv3493c	-	TRUE	TRUE	TRUE	TRUE	-2.14175	-1.79635	-1.30742	-1.83766	-2.71852	-1.99321	-1.12074	-1.29839	-0.310292	-0.416701	-0.978708	-0.986721	-1.94558	-1.69036	-1.77984	-3.46126	-1.34291	-1.71048	-0.942319	-1.49314	-1.13923	-1.95344	-2.6153	-2.07558	-1.79522	-1.88806	-1.68577	-2.49317	-1.99321	-1.93443	-1.70499	-1.84248	-1.67495	-0.52064	-0.877275	-2.20295	-1.37797	-2.29139	-0.724413	-2.41013	-2.47301	-1.60139	-1.97626
RVBD_3814c	Rv3814c	-	FALSE	FALSE	FALSE	FALSE	0.380183	-0.296794	0.0890059	-0.325949	0.87967	0.124086	-0.472609	-0.272203	0.828882	0.546152	0.761233	0.774802	0.376557	0.157917	0.583709	1.28255	0.308313	0.351413	-0.384545	0.555478	0.476737	0.36469	0.501188	0.210051	0.451501	-0.1982	-0.277209	-0.656799	0.124086	0.0921147	-0.421537	-0.215638	0.0715556	0.509969	-0.0586046	-0.173932	-0.833961	0.50874	-0.01854	-0.0549312	-0.0440599	-0.0528847	0.0859127
RVBD_3849	espR	-	TRUE	TRUE	TRUE	TRUE	-8.43979	-9.03758	-8.43916	-2.94337	-7.42684	-3.62109	-5.02143	-8.44649	-3.35104	-7.44793	-1.63813	-0.7582	-8.46372	-8.44978	-8.45386	-7.43796	-3.49073	-1.81262	-8.44829	-8.43611	-3.97413	-4.19401	-8.44933	-0.0376488	-8.43817	-8.42739	-3.9044	-2.80175	-3.62109	-7.43911	-3.89633	-1.9781	-2.29956	-1.82036	-1.26559	-8.45006	-1.53295	-3.35448	-3.62717	-3.18001	-4.53903	-3.4798	-8.45132
RVBD_2512c	Rv2512c	-	FALSE	FALSE	FALSE	FALSE	0.399802	0.336545	0.495002	-0.252713	0.813796	0.417895	0.308091	0.438717	0.211371	0.263536	0.500213	0.0979832	0.142358	0.6613	0.12403	0.68709	0.461546	0.291881	0.448328	-0.00233663	0.270769	0.284566	0.226423	0.183778	0.476181	0.362537	0.412022	0.517695	0.417895	0.143313	0.554627	0.633817	0.532488	0.391174	0.619443	0.276183	0.57285	0.21105	0.658271	0.365225	0.574109	0.238177	0.312212
RVBD_3842c	glpQ1	mod06	F	F	F	F	0.848105	-0.235441	0.857391	-0.635795	-0.236522	0.344576	0.589931	0.429458	1.65696	0.460412	0.630306	0.495562	-0.113242	0.111659	0.462464	1.04499	0.94231	0.651435	0.0196664	1.13105	0.0209192	-0.766951	-0.636869	-0.243332	-0.34645	-0.0243019	-0.215154	-0.825162	0.344576	-0.124343	-0.390779	-0.0586679	-0.605447	0.799826	-0.451801	-0.281202	-0.286907	0.208884	0.781869	0.390581	0.657702	0.343155	0.713302
RVBD_1405c	Rv1405c	mod09	TRUE	TRUE	TRUE	TRUE	-2.24785	-1.80439	-1.83124	-1.56569	-0.873089	-2.43489	-0.779564	-0.613272	-1.37798	-0.771475	-0.640224	-0.732771	-2.56605	-1.7754	-1.56547	-1.86212	-2.25793	-4.49072	-1.31117	-1.88797	-1.00714	-2.31125	-1.60011	-0.600544	-2.13318	-1.19719	-1.67932	-1.20113	-2.43489	-1.52795	-0.89783	-0.576324	-1.22694	-1.46646	-1.69651	-0.902038	-0.690312	-2.09703	-2.16771	-2.38329	-2.12925	-2.30102	-2.27467
RVBD_0914c	Rv0914c	-	FALSE	FALSE	FALSE	FALSE	0.247995	-0.483176	-0.181606	-0.0251382	-0.227667	0.028663	-0.411857	-0.323317	-0.33637	-0.594643	-0.522751	-0.316316	-0.357702	0.0157253	-0.180038	-0.71413	-0.134591	-0.043413	-0.0179521	-0.127579	-0.0563179	-0.0967403	-0.283941	0.22107	-0.0871231	-0.0208769	0.0523368	0.0157332	0.028663	-0.0398616	-0.0790049	-0.123355	-0.121232	-0.0425995	0.0639923	-0.167767	0.0324279	-0.074249	0.170044	0.0714863	0.0620283	-0.022503	-0.0478
RVBD_0455c	Rv0455c	-	FALSE	FALSE	FALSE	FALSE	NA	NA	NA	NA	NA	4.90393	5.88503	NA	NA	NA	6.93413	5.82099	NA	NA	NA	NA	NA	NA	NA	NA	NA	NA	NA	NA	NA	NA	NA	NA	4.90393	NA	NA	NA	NA	NA	NA	NA	NA	NA	NA	NA	NA	3.9692	NA
RVBD_0099	fadD10	mod01	TRUE	TRUE	TRUE	TRUE	-3.75235	-2.2249	-2.29775	-1.92396	-1.20824	-2.11229	-1.04196	-3.07839	-0.50248	-3.14608	-0.910322	-0.459569	-1.91765	-2.64786	-2.39218	-3.87068	-3.68403	-0.731091	-2.80335	-1.6727	-1.59163	-2.26473	-5.17145	-2.17457	-2.9692	-3.58931	-2.02274	-2.10492	-2.11229	-3.0935	-2.44757	-1.33665	-2.23593	-0.608281	-3.43303	-2.26326	-0.728273	-1.6858	-2.52376	-1.6769	-3.13309	-2.33467	-2.18799
RVBD_2226	Rv2226	-	TRUE	FALSE	TRUE	FALSE	-0.944806	-0.665254	-0.667915	-0.121245	-0.120691	-0.677136	-0.629349	-0.397149	-0.542445	-0.918339	-0.573179	-0.504214	-0.244764	-0.0652791	-0.303064	-0.0966158	-0.343156	-0.467941	-0.646906	-0.616483	-0.406251	-0.128957	-0.318537	-0.691526	-0.201584	-0.078866	-0.420093	-0.250963	-0.677136	-0.0494853	-0.185427	-0.406195	-0.292146	-0.742171	-0.548666	-1.17939	-0.341144	-0.550924	-0.688146	-0.606216	-0.436109	-0.233226	-0.748333
RVBD_3540c	ltp2	-	TRUE	TRUE	TRUE	TRUE	-5.33444	-5.3253	-3.82682	-4.46385	-8.94778	-3.3486	-2.24294	-2.20759	-3.57395	-8.9693	-1.34779	-0.896977	-5.97986	-6.54429	-9.97669	-8.96182	-9.967	-4.49092	-6.66637	-6.11737	-5.49553	-9.96725	-9.97417	-9.95009	-4.24	-9.95377	-9.96058	-6.14569	-3.3486	-4.07284	-4.98175	-8.95377	-5.45576	-1.45165	-9.95525	-5.63345	-9.97045	-9.95633	-9.95889	-9.96467	-9.95933	-6.12104	-4.82912
RVBD_2249c	glpD1	mod06	TRUE	FALSE	TRUE	TRUE	-0.328381	-0.539837	-0.372302	-1.78517	-2.15221	-2.54667	-3.28739	-1.77911	-1.96193	-2.62514	-0.864485	-1.37129	-3.59193	-2.08805	-1.03419	-3.09064	-2.09606	-0.702649	-2.54471	-2.97049	-1.13042	-2.29371	-1.97408	-2.15116	-2.04403	-1.3788	-2.452	-3.02976	-2.54667	-2.86102	-2.91724	-4.5871	-2.7599	-0.198262	-4.2116	-0.232377	-1.84616	-0.83193	-2.24353	-1.76927	-1.70977	-1.1203	-2.71871
RVBD_0410c	pknG	-	FALSE	FALSE	FALSE	FALSE	-2.19951	0.498425	-2.20808	-2.2299	-1.21476	-2.21819	-2.21989	-2.21437	5.64307	-1.21408	3.9412	3.6054	-2.23747	2.12423	-2.23098	-1.20736	1.78672	2.22611	-2.2201	1.64272	1.02277	-2.21232	-2.2216	4.78475	1.69273	-2.19118	1.10145	-2.20046	-2.21819	-1.2099	-2.22066	-1.21223	-2.21968	-1.21257	-2.20706	-2.22978	-2.21619	-2.2126	-2.21026	-2.21165	-2.20598	0.161029	-2.20887
RVBD_1909c	furA	mod07	FALSE	FALSE	FALSE	FALSE	-0.0713892	-0.629841	0.0233253	-0.628912	-1.04395	0.0794879	-0.107435	0.249994	-0.0643575	-0.844863	1.2295	0.863251	-0.257048	-0.576717	-0.93344	-1.08021	0.362131	0.397227	-0.100952	-1.20742	-0.272226	0.265223	-0.295068	-1.00129	-0.14485	-1.63018	-0.497221	-0.201489	0.0794879	0.147547	-0.132929	-0.467226	-0.742341	-0.03368	-0.801876	-1.42289	0.297377	-0.402331	-0.734654	-0.255279	-0.696384	0.34638	-1.26641
RVBD_2584c	apt	-	F	F	F	F	0.286119	-0.105786	0.262054	-0.636129	0.414845	0.219815	0.736983	0.4078	0.379096	-0.115501	0.670695	0.45343	-1.32129	0.414311	0.130997	-0.104657	0.120442	0.702674	0.269317	0.275461	0.198775	0.141972	0.435637	-0.22677	-0.639252	0.457755	-0.0317835	0.228583	0.219815	0.147612	0.239358	0.813084	0.415269	-0.043893	-0.0940481	0.131571	-0.505916	0.679775	0.013768	0.0952109	0.0883968	0.394567	0.129793
RVBD_2901c	Rv2901c	-	TRUE	FALSE	FALSE	FALSE	-1.6888	-1.05289	-0.789599	-1.4217	-0.951521	-0.651958	-1.65764	-0.194511	-0.11555	-0.25471	-0.779623	-0.0805973	-0.541637	-0.444299	-0.966149	-1.51861	-1.42981	-0.592174	-0.565554	-0.618657	-0.882528	-0.480942	-0.947722	-0.714635	-0.848161	-0.651085	-0.692854	-0.684056	-0.651958	-0.640232	-0.969969	-0.72319	-0.518827	-1.67805	-0.468788	-0.950531	-0.537258	-0.329961	-0.465957	-0.603633	-0.869264	-1.6349	-1.47758
RVBD_0171	mce1C	mod05	TRUE	FALSE	TRUE	FALSE	0.231627	-0.164631	-0.233055	-0.194647	0.72114	-0.215243	0.329437	-0.26679	-0.054817	0.166501	-0.570956	-0.257852	-1.00521	-1.10751	-0.33593	-0.151232	-0.405781	-0.210493	-0.202913	-0.303375	0.545108	-0.448231	0.0686769	0.637392	0.16297	-0.129117	-0.181679	-0.0682759	-0.215243	-1.07448	-0.348913	0.0811416	-0.149526	0.0244	0.171072	0.0483407	0.000498689	-0.103007	-0.941319	-1.22624	-0.866233	-0.292049	-0.484619
RVBD_1755c	plcD	mod07	TRUE	FALSE	FALSE	FALSE	-3.83538	-0.92808	-0.0440127	0.482	-0.873137	0.193782	-1.30328	-0.0920213	-4.32022	-7.46281	1.48583	1.64801	0.23139	0.151699	-4.33945	-7.45765	-4.45871	-1.27844	-0.352249	-2.69067	0.448255	-0.567817	-1.2019	-0.314354	0.364801	0.399056	-0.532462	-1.59533	0.193782	-0.603496	-0.0495165	-1.08913	-0.261374	-7.44448	1.5061	-1.84917	-3.17934	-0.824133	0.875662	0.0710596	-0.537161	0.323502	-0.0939765
RVBD_0470c	pcaA	mod05	TRUE	TRUE	TRUE	TRUE	-2.49348	-3.06662	-3.56078	-4.81712	-2.22725	-1.05534	-4.02822	-1.65562	-0.4754	-8.35268	-1.10588	0.434767	-3.13584	-3.6768	-0.515114	-8.34066	-9.35257	-4.99803	-2.11354	-0.426697	-2.21865	-2.36977	-3.2009	-1.50299	-3.72702	-2.95371	-2.04857	-1.11437	-1.05534	-0.71993	-0.521722	-0.985376	-0.937328	-8.33676	-9.3292	-3.42847	-0.600879	-2.24628	-2.11983	-1.21711	-1.05703	-2.90743	-2.09329
RVBD_3813c	Rv3813c	-	FALSE	FALSE	FALSE	FALSE	1.13668	-0.09443	0.969178	-0.0146068	-1.11521	0.536915	0.180429	0.0818154	-0.239024	1.22169	0.813338	0.298223	0.652585	0.72078	0.511456	0.0914804	0.337578	0.851704	0.201524	0.526357	0.629695	0.614133	1.12004	0.186703	0.0699433	-0.21438	0.867786	0.71686	0.536915	0.92272	-0.132277	0.732911	0.297771	1.26786	-0.283243	0.292421	0.245574	1.41074	1.15793	1.00011	1.14401	0.395551	0.655028
RVBD_2431c	PE25	-	FALSE	FALSE	FALSE	FALSE	-0.899112	0.689517	0.107834	0.108445	-0.739299	-0.0802768	0.582198	0.808397	0.531752	-1.43502	0.953424	0.820253	0.538231	0.744745	1.05878	1.33612	-0.234463	1.22436	0.484709	-0.194011	0.00158913	-0.341382	-0.661249	-0.0835944	0.467239	0.179217	-0.0284524	-0.0345477	-0.0802768	0.334075	0.545996	0.120301	0.849231	0.283719	0.184382	0.363327	0.0851479	0.168891	-0.10684	0.57628	-0.0447605	0.222352	0.465859
RVBD_1583c	Rv1583c	mod11	FALSE	FALSE	FALSE	FALSE	0.100257	0.18232	0.752238	-0.77689	-0.680876	0.557609	1.05109	0.829914	0.986057	-7.61953	1.7203	1.13243	-0.119427	0.985303	0.242414	1.16738	1.13545	-2.24453	-0.863756	0.212937	0.234695	-1.39731	-0.740249	0.100633	-3.4415	0.392179	0.835273	0.526395	0.557609	-0.140057	0.87893	1.41132	0.887458	-1.98791	-2.74544	0.91488	-0.196759	0.655344	0.619605	0.0873612	-0.321085	1.2118	-0.995678
RVBD_2185c	TB16.3	-	FALSE	FALSE	FALSE	FALSE	1.08439	0.487577	1.1964	1.20219	0.423672	-0.262094	0.289531	0.163917	0.632419	-1.40963	0.81095	0.0639885	-0.551393	0.206058	0.0531508	-0.112637	0.36973	0.00887624	0.603668	0.807141	0.569556	0.319177	0.648337	1.23765	0.273914	-0.00290871	0.248985	-0.281113	-0.262094	-0.040094	0.0395574	1.04624	0.0353009	-0.833285	1.44073	0.371836	0.695823	0.281944	-0.11227	0.11686	0.758842	0.534924	0.667499
RVBD_3050c	Rv3050c	mod20	TRUE	FALSE	FALSE	FALSE	0.0864012	0.48265	1.2647	-0.349525	-6.20816	-0.840917	1.92986	2.79267	0.933283	-6.21943	2.32288	2.34785	1.6803	-1.67498	1.19705	-6.21344	2.14896	1.24042	0.593708	-0.0402468	1.03782	-0.0916521	1.23218	0.15964	0.695332	-0.804869	-0.720959	-0.715351	-0.840917	-2.81196	-1.59229	0.863834	-1.60768	-0.58778	0.759141	-0.552615	-1.7281	-0.0903184	0.460539	0.199001	-3.93642	1.82066	1.55755
RVBD_1059	Rv1059	mod08	F	F	F	F	0.47048	0.927283	0.963665	0.120065	-1.26607	1.19962	2.12444	0.502353	-3.37824	-6.51876	1.78624	1.5397	1.27527	2.16696	2.39918	1.85259	-1.41546	-2.11169	-1.09359	-2.1563	-1.09388	0.859567	0.275971	0.131899	-0.529955	0.658003	0.897997	0.618913	1.19962	0.0767201	1.12612	-0.0648508	1.35155	2.46269	1.51401	-7.52465	1.0055	1.02093	-0.189478	0.585452	0.445592	0.698471	0.987208
RVBD_1047	Rv1047	-	FALSE	FALSE	FALSE	FALSE	0.408622	0.381229	0.577038	0.0442597	0.479378	0.425884	0.442785	0.264303	0.471948	0.0854495	0.501401	0.290647	0.111211	0.542139	-0.0472243	0.852945	0.456854	0.231082	0.503489	0.145324	0.19229	0.218232	0.234702	0.361854	0.491089	0.356055	0.514745	0.571035	0.425884	0.0416861	0.564684	0.69536	0.448789	-0.683535	0.413026	0.236753	0.647691	0.200545	0.662362	0.439351	0.598548	0.376317	0.362269
RVBD_3499c	mce4A	mod16	TRUE	TRUE	TRUE	TRUE	-1.33004	-1.43719	-0.866547	-0.90235	-2.66782	-1.16479	-0.653956	-1.8381	-0.79526	-1.65031	-0.483721	-0.244087	-2.34016	-2.41101	-1.04834	-1.21658	-1.20129	-1.10108	-1.83746	-2.01854	-1.07688	-2.01654	-1.41708	-1.46349	-1.05803	-1.20385	-1.30441	-1.35234	-1.16479	-1.44995	-1.22387	-0.803372	-1.47273	-0.399476	-1.64431	-1.00555	-1.72531	-1.31822	-1.25315	-1.7272	-1.78345	-1.35099	-1.31705
RVBD_1194c	Rv1194c	mod06	FALSE	FALSE	FALSE	FALSE	-0.330597	0.753661	0.0901194	0.352018	0.403985	-0.0284568	0.680051	0.964326	1.64892	-0.52599	0.609775	0.574398	0.436706	0.673991	0.0127218	-1.06115	0.705175	0.264865	0.505612	0.228292	0.85254	1.30669	0.720123	1.03015	0.777759	1.11183	0.930754	0.716484	-0.0284568	0.987782	0.250679	1.01724	0.894775	1.7189	0.375633	0.120305	0.762805	0.536731	0.558699	0.595538	0.808268	1.03154	0.348963
RVBD_3679	Rv3679	mod06	FALSE	FALSE	FALSE	FALSE	1.78367	-0.0578878	-0.489046	-7.03904	-6.02019	-1.21346	0.160709	-0.846876	-7.02894	1.23049	2.27986	3.46404	0.434349	-7.03788	1.42252	2.81125	0.833986	-0.672753	-0.00723928	-1.38812	-0.293106	-7.03311	-7.04016	-7.0198	-3.11141	-0.647178	-0.550001	0.110332	-1.21346	-1.39069	-3.77142	-6.02642	-3.21095	2.21545	-1.16226	1.06174	-7.03672	-0.359132	0.986261	0.0300539	0.466548	1.35762	0.327165
RVBD_0490	senX3	mod04	TRUE	TRUE	TRUE	FALSE	-1.01455	-0.978796	-0.261802	-0.807044	0.456148	-0.683279	-0.374299	-0.760072	-0.562602	-1.13943	-0.574794	-0.150599	-0.373662	-1.21789	-0.030327	-1.09471	-0.168415	-1.05965	-0.714312	-0.949584	-0.393315	-1.40825	-0.127247	-0.246806	-1.29678	-0.726769	-0.472678	-0.557217	-0.683279	-0.300333	-0.649416	-0.926312	-0.213065	-0.231494	-0.918657	-1.16828	-0.0629058	-0.511235	-1.13382	-0.687158	-0.632273	-0.877095	-0.94597
RVBD_1404	Rv1404	mod03	TRUE	FALSE	FALSE	FALSE	-1.88238	-1.62943	-0.729439	0.433584	-0.417784	-0.856155	-0.0265724	0.268403	-8.46528	-7.47774	-1.80156	-1.62804	-4.10169	-3.5256	-8.48895	-7.47255	0.256035	-1.16341	-0.786847	-1.1816	-1.1303	-0.0404826	-2.18247	0.855315	-1.18405	-1.30416	-1.31256	-0.762399	-0.856155	-3.1429	-0.372919	-0.396603	0.218915	0.452144	-2.60589	-0.423005	-1.80977	-0.832256	-1.52935	-2.40669	-2.27966	-1.29827	-0.730797
RVBD_3552	Rv3552	-	TRUE	TRUE	TRUE	TRUE	-9.3273	-6.59635	-9.32236	-2.39602	-8.31122	-5.05302	-1.26685	-9.33186	-9.31568	-8.33091	-1.91296	-1.79725	-2.16045	-9.33009	-9.33924	-8.32474	-9.32797	-4.01723	-9.33138	-9.32155	-9.32566	-9.33073	-9.3392	-9.31265	-9.31964	-9.31931	-3.81216	-4.81137	-5.05302	-4.92746	-4.58467	-8.31557	-9.32652	-8.3134	-9.32122	-9.33573	-9.33253	-9.31896	-9.31804	-9.32596	-4.72157	-5.55179	-6.05305
RVBD_3567c	hsaB	mod07	F	F	F	F	-1.09633	-2.15477	-2.3287	-0.40874	1.21334	0.0322806	1.99869	-0.51413	-3.55522	-0.371916	1.37115	1.10093	-1.14845	1.0857	-0.4183	-2.41187	0.0825968	-1.99243	-0.114787	0.406877	-1.49985	-1.18044	1.15793	0.859114	0.122577	-0.453851	0.00257309	-0.93409	0.0322806	1.55358	-0.113826	-2.74547	-1.37013	-6.67111	-1.81573	-0.193687	-7.69352	-2.24483	-0.111143	-0.0112922	0.803205	0.994194	-1.25277
RVBD_3557c	Rv3557c	-	TRUE	FALSE	TRUE	FALSE	-1.20213	-0.78483	-0.639479	0.205345	0.254566	-0.73086	-1.32014	0.221307	0.0194524	-1.65962	-0.734489	-0.438689	-0.631579	-1.99388	-0.00509909	0.224686	-0.645165	-0.755008	-0.821537	-0.794384	-0.626289	-0.0935309	-0.60149	-0.792076	-0.789944	-0.0343358	-0.476534	-0.788101	-0.73086	-1.55749	-0.993918	-0.473845	-0.210983	-0.878244	-0.150623	-1.45419	-0.30947	-0.715342	-0.83686	-0.467285	-0.770665	-0.641122	-0.33217
RVBD_2502c	accD1	-	TRUE	TRUE	FALSE	FALSE	-0.663514	-1.27222	-0.692386	-0.342045	-1.31516	-0.641973	-0.156384	-0.657159	-0.308792	-0.954757	-0.678278	-0.586263	-0.443631	-0.64308	-0.211805	-1.30855	-0.601458	-0.429094	-0.352796	-0.571629	-0.860742	-1.17438	-0.719339	-0.402595	-0.476646	-0.474115	-0.531933	-0.453904	-0.641973	-0.352673	-0.560325	-0.590334	-0.486567	-0.250316	-0.803748	-0.806458	-0.971025	-0.572659	-0.401179	-0.718491	-0.95354	-0.310044	-0.71757
RVBD_0214	fadD4	-	FALSE	FALSE	FALSE	FALSE	0.382001	0.302631	0.238168	0.342563	0.157752	0.187414	0.0896768	0.0438856	-0.131599	-0.531026	0.430249	0.258213	0.4341	0.327779	-0.39568	0.169262	-0.154995	0.245718	0.0456752	0.00467221	0.140802	-0.223791	-0.162696	-0.137739	0.110813	-0.0104278	0.167759	0.218906	0.187414	0.128698	0.0813431	-0.0256348	-0.0110378	0.020104	-0.0957992	0.534018	0.270901	0.0307682	0.0494354	0.202131	0.346545	0.0414429	0.223111
RVBD_2052c	Rv2052c	mod17	TRUE	TRUE	FALSE	FALSE	-0.386959	-0.697089	-0.475001	-0.200892	-0.679916	-0.381188	-0.799328	-0.550372	-0.270117	0.491685	-0.415781	-0.599088	-0.643762	-0.376359	-0.487876	0.379961	-0.149907	0.142503	-0.368117	-0.0665645	-0.516766	-0.502869	-0.452444	-0.325964	-0.690375	-0.251085	-0.30003	-0.242404	-0.381188	-0.000295885	-0.21998	-0.00657664	-0.193562	0.302909	-0.124474	-1.12101	-0.571665	-0.114423	-0.0369335	-0.31518	-0.304016	-0.09111	-0.589292
RVBD_2401	Rv2401	-	F	F	F	F	1.51495	1.53239	1.2573	-4.68912	1.61162	1.16578	0.0664604	0.0603173	1.23357	-0.952209	1.25845	0.688612	0.154746	-0.812695	1.04625	0.436621	1.61652	1.33432	0.181016	-0.150249	0.877253	0.814627	0.0932655	0.596824	0.623357	0.93725	1.00239	0.052388	1.16578	-0.14208	1.11308	2.07952	1.41209	-7.25392	1.67405	0.908153	1.61229	1.25366	1.3364	0.544935	0.495985	1.16147	0.677107
RVBD_2932	ppsB	mod08	TRUE	FALSE	FALSE	FALSE	1.59571	0.891353	0.898087	0.920084	0.903107	1.27329	1.04793	0.90259	1.15682	0.467264	0.408874	0.485574	-1.19831	-2.47865	-0.0265442	-1.32918	-0.691105	-0.353075	0.439386	1.25698	0.589356	0.785015	0.0253159	1.23412	1.56349	1.30232	1.50495	1.13062	1.27329	0.387586	0.545305	1.16566	0.904774	0.291873	1.85112	0.775387	0.650577	1.53732	1.61191	1.55772	1.01138	0.819576	0.988092
RVBD_0056	rplI	mod06	TRUE	FALSE	TRUE	FALSE	-0.884864	-0.813689	-0.77848	-1.53722	-7.64908	-0.67913	-4.36492	-0.753663	-1.6012	-7.66439	-1.19787	-1.05025	0.35009	-0.632427	1.18591	-7.66174	-4.66196	-1.69595	-0.66554	1.01658	-0.927187	-0.121653	0.820085	-1.28542	-1.13477	-0.448271	-2.88321	-1.09486	-0.67913	-3.02245	-4.80872	-3.01846	-0.708731	-2.03251	-0.234921	-2.02532	-0.302711	-1.40584	-1.7081	-2.13215	-1.91294	-0.993296	-2.94811
RVBD_1493	mutB	mod19	TRUE	TRUE	TRUE	FALSE	-1.14015	-1.33027	-0.918044	-0.582767	-0.708638	-0.96114	-0.290806	-0.532752	-0.868255	-2.07596	-0.580986	-0.139367	-1.24994	-1.33509	-0.191649	-0.303858	-0.836674	-0.147731	-1.03397	-0.860552	-0.822504	-0.740198	-0.836353	-0.874731	-0.645617	-1.01252	-1.25111	-0.764107	-0.96114	-0.418542	-0.990574	-0.881522	-1.01927	-0.213439	-0.76006	-0.845931	-0.559371	-0.824509	-1.04788	-1.14613	-1.60088	-0.591898	-1.12428
RVBD_3414c	sigD	-	F	F	F	F	-0.542218	-0.806868	-0.465679	0.019589	-0.71211	-0.582284	-0.933249	-0.753557	0.194472	-1.19635	-1.00636	-0.296092	-0.131134	-0.152885	-0.675219	0.0233699	-0.536087	-1.00091	0.0644808	-0.257631	-0.216644	-0.095307	-0.531522	0.589532	-0.191287	0.0275404	-0.264793	-0.338783	-0.582284	-1.17663	-0.102375	-0.173934	-0.118447	-0.0690555	-1.66692	-0.511894	-0.335522	-0.283952	-0.406078	-0.182741	-0.413583	-0.163283	-0.233599
RVBD_1930c	Rv1930c	-	TRUE	FALSE	TRUE	FALSE	-1.022	-0.969842	0.470575	-0.0879816	1.83875	-0.15287	1.02549	-0.508137	-1.00988	0.895052	-1.77787	-0.313098	-5.2521	-0.0202729	-1.58963	-0.641178	-1.72731	1.47412	0.239136	0.471177	-1.17018	-0.78906	-1.73861	-0.931252	0.187166	-1.03838	-1.52731	-0.393558	-0.15287	0.816157	0.394986	-1.20436	-0.300731	-2.02539	-0.992439	-1.78826	-3.37415	-0.425523	-0.402633	0.469656	-0.913298	0.400703	-0.682891
RVBD_0860	fadB	mod06	TRUE	TRUE	FALSE	FALSE	-0.852979	-3.06581	-7.03809	-7.04652	-0.791822	-0.529078	0.720013	-7.04452	-7.03654	-6.04295	2.28846	1.67703	0.0272535	-0.0758496	0.651864	-6.0362	-1.28729	-7.04606	-0.108808	0.54988	1.06724	0.623931	-0.0677012	-0.657491	-7.03579	-7.02497	-7.03884	-1.36098	-0.529078	-2.09579	-1.065	-0.744508	0.175082	-6.02767	-7.02912	-7.04983	-7.04393	-0.0239851	-7.03332	-0.927112	-0.129788	-0.544667	-7.0455
RVBD_1195	PE13	-	FALSE	FALSE	FALSE	FALSE	0.352805	0.251615	-0.0338017	0.69198	0.381052	0.42982	0.603923	-0.0650866	0.818296	0.79879	0.786353	0.965127	0.882851	0.369457	0.904067	0.0136733	0.540723	0.203524	0.36385	0.252059	0.539742	0.942317	1.03335	0.135983	0.668197	0.736545	0.388151	0.565645	0.42982	0.438224	0.344816	0.45368	0.625433	0.751627	0.102482	-0.220474	0.485209	0.242261	0.490288	0.644969	0.584825	0.926783	0.553574
RVBD_3796	Rv3796	-	FALSE	FALSE	FALSE	FALSE	-0.0779983	0.19793	0.476657	0.0236842	-0.104503	0.234401	0.47314	0.467955	0.445893	-0.25053	0.388934	0.457682	-0.0183924	0.102299	0.460852	0.340129	0.297432	0.0479909	0.418975	0.0962716	0.303777	0.0295167	0.397963	0.233424	0.146811	0.557856	0.230133	0.195839	0.234401	0.206166	0.286504	0.479186	0.303647	0.783337	0.105088	0.329536	0.0350844	0.320722	0.426748	0.383518	0.380588	0.326528	0.256662
RVBD_0498	Rv0498	mod06	TRUE	FALSE	FALSE	FALSE	-1.55333	-0.468618	-0.79293	-0.175375	-0.548905	-1.22224	-0.076298	-0.408322	-0.513966	-1.84672	-0.724092	-0.0455268	-0.293061	-0.42506	-0.170559	-2.82547	-0.0568273	-1.22813	-0.477698	-0.593633	-0.12316	0.153786	-0.451013	-0.0175908	0.00640995	-0.861079	-0.79326	-0.387736	-1.22224	-1.23292	-0.446393	-0.547674	-0.222921	-0.36116	-0.394571	-0.717713	-0.446745	-0.798523	-1.09013	-0.363572	-0.65099	-0.390548	-0.333207
RVBD_0112	gca	mod08	F	F	F	F	-0.832736	0.620317	0.634547	0.666034	0.49418	0.329968	0.716851	-0.196173	1.14227	-0.605582	0.774169	0.879686	-0.336367	0.106297	-0.914103	0.171387	-1.76613	0.284427	0.562578	0.553565	0.406593	0.199219	0.130667	0.841251	0.581183	0.412401	0.441506	0.73497	0.329968	0.563514	0.231395	0.309678	0.306082	1.18816	1.33059	0.218605	-0.0521298	0.839503	0.594642	0.664455	0.228994	0.607685	0.343357
RVBD_0645c	mmaA1	mod12	F	F	F	F	0.50634	0.286859	0.592075	-0.199151	0.453227	0.360996	0.350787	0.110304	0.827219	0.311566	0.314101	0.211904	-0.131571	0.0992835	0.0981338	0.71894	0.806857	0.456508	-0.0299586	0.866668	0.192404	-0.0636414	0.139243	0.47898	-0.00408797	0.62737	0.135629	0.0320828	0.360996	-0.134269	0.0425431	0.33471	0.0432312	0.212012	0.327126	0.437689	0.336805	-0.0689942	0.01534	-0.0602173	0.0307842	-0.0731046	0.21821
RVBD_2331A	Rv2331A	-	FALSE	FALSE	FALSE	FALSE	0.147281	0.0919079	0.22782	-0.017387	0.358749	-0.0279625	0.154423	0.204477	0.437264	0.214006	-0.588849	-0.325304	0.00779764	-0.256278	0.148967	0.00568479	-0.312147	-0.550487	0.19723	0.0195736	0.0673892	0.124537	-0.147384	0.233512	-0.0784917	0.192026	0.270076	0.111412	-0.0279625	-0.175245	-0.00507248	-0.0175406	-0.111299	-0.133458	-0.347974	0.220521	-0.283389	0.101815	0.358826	0.113689	0.0841647	0.0296884	0.0242716
RVBD_2069	sigC	mod01	TRUE	TRUE	TRUE	TRUE	-5.24529	-3.03056	-2.64794	-0.692966	-1.40286	-3.52074	-1.55416	-2.52838	-1.36075	-3.79586	-1.10636	-0.902109	-2.53062	-5.56852	-1.0237	-1.94115	-1.44562	-0.812372	-4.46159	-3.80808	-1.84232	-3.58338	-3.33275	-2.46014	-2.40426	-3.22469	-2.21625	-2.25905	-3.52074	-4.24077	-2.61779	-0.649951	-2.08407	0.536086	-1.51035	-5.19841	-0.338057	-3.46746	-4.74774	-3.02197	-4.59239	-2.43137	-3.75487
RVBD_0381c	Rv0381c	mod16	TRUE	TRUE	TRUE	TRUE	-1.0571	-1.49948	-0.54076	-1.12218	-1.06189	-0.720556	-0.733264	-0.885941	-0.443142	-1.13016	-0.548934	-0.315627	-2.09682	-1.48057	-0.919654	-1.03993	-1.21946	-0.691146	-1.18098	-0.693863	-0.592084	-1.35805	-1.54228	-0.7773	-0.968916	-1.18398	-1.00018	-1.19804	-0.720556	-0.755839	-1.07892	-0.912947	-1.16685	-0.706423	-1.09669	-1.5776	-1.05396	-0.921675	-0.787785	-1.27082	-0.870754	-0.882851	-0.762569
RVBD_0831c	Rv0831c	-	FALSE	FALSE	FALSE	FALSE	0.103527	0.219251	0.195572	0.119082	-0.0163134	0.351369	0.226997	0.801035	0.365943	0.077119	0.434782	0.514698	-0.0167454	0.0658766	-0.293309	-0.0716711	-0.107865	-0.0590313	-0.125498	-0.0739734	0.0450027	-0.0699293	0.0348356	0.613328	0.372078	0.110821	0.244206	0.131182	0.351369	0.149845	0.0597827	0.388215	0.267112	0.534852	0.574215	0.63459	0.0486191	0.583381	0.495833	0.4423	0.399802	0.636688	0.457537
RVBD_0912	Rv0912	-	TRUE	FALSE	FALSE	FALSE	-0.680443	-0.0961466	-1.1847	0.587878	1.70858	-0.915409	0.0463776	-8.67114	0.120629	0.544229	1.40303	0.335705	-0.633601	1.22463	-0.397738	-0.138435	-3.3967	0.498318	0.166073	0.0201622	-0.600015	-0.614425	-0.1742	-8.64927	0.800354	-0.36406	0.413136	0.279079	-0.915409	-1.38882	-0.584194	-1.57388	-1.448	0.332291	-0.0708916	0.245485	0.126398	-0.541068	-1.47555	0.0339096	-0.295179	0.515464	-0.563772
RVBD_3316	sdhC	-	TRUE	FALSE	FALSE	FALSE	0.066308	-0.870393	-1.29571	-0.543009	-1.51272	-0.310221	-1.45142	0.388842	-0.544568	-0.0167232	-0.93899	-1.14723	-0.343557	-1.49884	-1.9611	0.220804	-0.921019	-0.140895	-0.301359	-0.203975	-1.02399	-0.56235	-1.85379	-0.904837	-0.715036	-1.63637	-0.786662	-0.810154	-0.310221	-0.125667	-0.372118	-1.87334	-0.809488	-0.530437	-0.296636	0.368639	-1.92345	-0.198007	0.0401099	0.0089576	-0.0214943	-0.732694	-0.908433
RVBD_3555c	Rv3555c	mod03	F	F	F	F	-0.729809	0.290723	0.638828	-0.578284	0.467917	-1.76494	-0.80117	0.295993	0.353661	-7.92677	1.54056	1.00538	-1.05931	0.344172	1.4381	-1.208	-3.65446	-1.88849	-0.231781	0.0623143	-0.231549	0.253726	0.14841	0.918079	0.380737	0.116908	0.576234	0.950579	-1.76494	0.860276	-0.358935	-1.19129	-0.699821	-7.90941	-2.24646	-1.51573	-0.939762	-0.155498	0.175204	0.550793	0.179709	0.795024	0.0144829
RVBD_1791	PE19	mod07	TRUE	TRUE	TRUE	FALSE	-8.55814	-5.26495	-8.55822	-8.56045	-2.30539	-3.30935	-1.98798	-3.10111	0.228221	-7.5643	1.5278	1.70814	-8.5788	-8.56328	-1.89975	-7.55666	-8.56142	-8.56855	-2.77443	-4.71194	-8.56128	-4.71535	-3.16683	-0.244571	-8.55028	-8.54892	-8.55571	-8.56367	-3.30935	-7.55588	-8.56281	-3.61578	-4.36369	-7.54505	-8.55086	-8.5689	-8.56526	-5.17065	-8.55433	-5.19364	-4.04111	-3.80293	-5.31144
RVBD_3682	ponA2	mod13	TRUE	TRUE	TRUE	TRUE	-2.31922	-1.08662	-1.54372	-1.5648	-2.67779	-2.9692	-2.1964	-1.1525	-1.65366	-3.02822	0.642926	-0.433016	0.0752204	-0.238254	-0.69962	-3.79956	-1.11192	-0.92349	-1.22091	-0.391981	-0.808282	-1.19498	-0.801045	-1.47527	-0.894831	-0.788359	-1.40844	-2.42923	-2.9692	-3.11351	-1.08158	-0.9429	-0.950306	0.256489	-0.776339	-1.68318	-0.596316	-2.04259	-2.74393	-1.46556	-2.83657	-1.47354	-2.38518
RVBD_1364c	Rv1364c	mod08	TRUE	FALSE	TRUE	FALSE	-0.887462	-0.491666	0.000297986	-1.00938	-0.752045	-0.42118	0.50561	-0.527342	0.191627	0.0701862	0.639712	1.08378	-0.494075	-0.793382	0.927178	0.696203	0.412366	0.00242959	-0.325771	-0.0301483	-0.622547	-0.954405	0.148156	-1.15875	-0.426629	-1.62597	-0.986062	-1.22545	-0.42118	-1.17847	-0.101763	0.209008	-0.412566	0.857787	-0.107614	-0.924443	-2.14475	0.202156	-0.881652	-0.553007	-0.379315	-0.0895514	-1.0245
RVBD_1314c	Rv1314c	-	TRUE	TRUE	TRUE	FALSE	-0.786766	-1.24018	-0.83179	-0.955608	-1.40349	-1.48134	-0.78517	-0.857002	-0.729244	-4.06421	-0.707254	-0.594094	-0.337873	-1.2914	-0.25632	-0.736664	-0.584859	-0.937096	-1.55056	-0.823606	-1.17027	-1.41951	-1.10543	-0.883178	-0.651594	-0.376891	-1.1079	-1.25412	-1.48134	-1.07346	-1.30267	-0.796192	-0.689645	-2.12692	-1.2508	-0.51655	-1.2279	-1.06734	-1.03426	-0.992119	-1.4635	-0.736485	-1.23519
RVBD_0513	Rv0513	mod05	TRUE	FALSE	TRUE	FALSE	-0.657149	-0.404938	-0.765373	-1.5088	0.231786	-1.19936	0.418894	-0.374907	0.124801	0.48156	-1.06566	-0.751677	-2.32955	-1.2076	0.00434664	-1.40117	-1.38055	-0.792875	-0.194489	-2.48114	0.155553	-0.946177	-0.209234	-0.667394	-1.34638	-0.752933	-0.602316	-0.301041	-1.19936	-0.900855	-1.23273	-0.481271	-0.716695	-0.35186	-0.992111	-0.813423	0.190108	-0.718491	-1.37689	-1.96839	-1.15372	-1.32975	-0.996616
RVBD_0135c	Rv0135c	mod12	F	F	F	F	-1.49891	-0.282583	-1.51996	-0.00725791	-0.77272	-0.39631	-0.935251	0.193965	0.513465	-9.18532	-1.55094	-0.243519	-0.837658	-2.25098	-2.36513	-2.09817	-2.15424	-1.85288	-0.311951	-1.22568	-0.723331	-0.693616	-1.26152	-0.777883	0.167547	-0.122981	-0.621482	-0.208251	-0.39631	-0.193524	-0.588046	-1.4221	-0.28218	0.382488	0.2035	0.254753	-0.71901	-0.623672	0.445421	-0.130587	-0.785326	-0.660449	-0.4976
RVBD_1372	Rv1372	-	F	F	F	F	-0.170545	-0.376466	-0.369057	-0.101596	0.890479	0.438983	0.359	0.28848	0.567534	-9.43758	1.05088	0.821851	0.612623	0.0732728	0.971988	0.596576	0.339004	0.141227	0.095896	0.35962	-0.0753234	0.146513	-0.422501	0.194511	-0.101905	0.493694	0.164638	0.450131	0.438983	0.364479	0.849876	0.74331	0.127038	0.336091	-1.6417	0.186492	-0.129083	0.362298	0.0738631	0.00622079	0.307879	-0.60597	-0.0601835
RVBD_1452c	PE_PGRS28	-	FALSE	FALSE	FALSE	FALSE	0.243125	0.129797	0.259093	0.400969	0.0441961	0.384256	0.435866	-0.464367	0.434132	0.179238	0.718091	0.595475	-0.292978	0.746655	-0.221405	0.813051	0.869301	0.595271	0.592647	0.288142	0.249943	0.0235099	0.0685464	-0.100227	-0.0390513	0.111805	0.389768	0.768249	0.384256	0.397054	0.57667	0.26414	0.408203	0.274804	-0.0585795	-0.421395	-0.529246	0.181425	0.341525	0.159717	0.311149	0.708894	0.172757
RVBD_2629	Rv2629	-	F	F	F	F	-0.25514	-0.305545	-0.213313	0.0339545	-0.0785666	-0.312223	-0.538385	-0.259898	-0.350027	0.297752	-0.469808	-0.240453	-0.108996	-0.337271	-0.453142	-1.29692	0.174561	-0.703842	-0.246907	-0.169756	-0.0697096	-0.104972	-0.188685	0.214063	-0.296404	-0.071221	-0.190078	-0.151068	-0.312223	-0.217668	-0.16616	-0.197572	-0.301814	0.122423	-0.45405	-0.107031	0.248022	-0.329117	-0.198536	-0.160134	-0.180282	-0.171087	-0.174897
RVBD_3045	adhC	-	FALSE	FALSE	FALSE	FALSE	0.584402	0.408229	0.0556841	-0.103807	0.96859	0.223653	0.0972078	0.590289	0.817772	0.74022	0.610994	0.400874	0.117725	-0.0302719	0.271729	-1.22303	0.172084	-0.772751	0.0823604	-0.13214	0.429774	0.421055	0.412512	0.819432	0.0593299	0.0520904	0.376827	0.565671	0.223653	-0.116933	-0.0414936	0.595311	0.23009	-1.34196	-0.161573	0.644144	0.598969	-0.01994	0.201655	-0.194088	0.123457	0.0893413	0.240891
RVBD_0390	Rv0390	mod20	TRUE	TRUE	TRUE	TRUE	-1.3618	-2.114	-0.611855	-2.72738	-2.57788	-1.08793	-1.57963	-3.48163	-2.63173	-2.58751	-0.875522	0.127906	-1.76782	-0.892236	-1.131	-0.365424	-4.00284	-2.90945	-1.38909	-1.21895	-2.09453	-2.21419	-0.435136	-2.97698	-1.24421	-1.44547	-1.08359	-1.13518	-1.08793	-0.310273	-1.66553	-1.25086	-0.954139	0.759883	-0.715329	-1.88214	-0.337749	-0.897495	-1.21994	-1.4302	-0.662911	-1.66386	-2.39619
RVBD_3421c	Rv3421c	mod20	TRUE	FALSE	FALSE	FALSE	0.27819	0.884037	0.559587	-1.26369	1.70165	1.83154	0.876103	-1.21084	1.48619	-7.07121	1.734	1.31918	-1.42303	-2.63773	-0.0129102	0.0176363	0.179599	0.910479	1.11946	1.11699	-1.17048	-0.277211	-1.14651	-0.421149	-0.163	-0.23978	1.15134	1.00318	1.83154	1.68671	1.25766	2.00472	0.416165	-0.0657997	-0.259881	-1.65292	-1.02199	1.63104	1.63969	1.8787	2.14346	0.952411	1.4991
RVBD_0985c	mscL	-	FALSE	FALSE	FALSE	FALSE	0.202976	0.402889	0.582949	-0.261911	-0.338943	0.409642	-0.165257	-0.106177	0.694284	0.48671	0.467561	0.149747	-0.242577	0.258406	0.476396	0.548454	-0.398125	0.184194	0.133749	0.145373	0.446684	0.481176	0.251903	0.464608	0.385507	0.258247	0.29298	-0.14022	0.409642	0.0407969	0.0302327	0.198994	0.195795	-1.15645	0.700717	0.563356	0.224676	0.0770807	0.502445	0.179237	0.263059	0.290787	0.364588
RVBD_0371c	Rv0371c	-	FALSE	FALSE	FALSE	FALSE	-0.392881	-1.66033	0.481494	2.77892	1.1895	2.33324	2.46985	-6.75942	0.57071	-5.75741	1.83587	3.04314	-2.395	-3.33299	-6.77103	-5.75361	-6.75733	-6.76777	1.38245	1.33998	0.670774	0.707795	-0.453648	1.6131	1.62135	-1.8161	1.3399	0.385408	2.33324	-0.865451	0.990382	-0.0144829	1.20697	-5.73733	0.912419	1.00113	-2.43537	1.25493	0.599332	-0.557572	1.50503	1.07768	-0.251274
RVBD_0256c	PPE2	mod19	TRUE	TRUE	TRUE	FALSE	-0.825988	-1.32304	-0.455208	-0.606261	-0.66369	-0.851787	-0.611732	-1.29496	-0.634895	-2.43153	-0.444558	-0.221014	-0.569702	-0.971599	-0.289641	-0.409686	-0.0533615	-0.280483	-0.884729	-0.718425	-0.854091	-0.648235	-0.608819	-0.457347	-0.328473	-0.0700388	-0.865839	-0.377338	-0.851787	-0.271021	-0.944787	-0.627241	-0.910642	-0.427684	-0.590481	-0.674803	-0.552209	-0.565233	-0.757864	-0.94454	-1.47433	-0.654598	-0.958101
RVBD_3115	Rv3115	-	FALSE	FALSE	FALSE	FALSE	0.132196	0.398459	0.529112	-0.113527	0.457575	0.381605	0.214136	0.282578	0.087026	0.0701732	0.512094	0.128509	0.0626638	0.48969	-0.297555	0.668702	0.253478	0.117948	0.395485	0.192904	0.195543	0.156824	0.0875922	0.217933	0.510316	0.501792	0.352022	0.435725	0.381605	0.131797	0.530643	0.578617	0.37927	0.43174	0.0961921	0.122128	0.587619	0.196751	0.539608	0.356904	0.535988	0.258934	0.218216
RVBD_1220c	Rv1220c	mod08	TRUE	TRUE	FALSE	FALSE	-2.51525	-1.53933	-1.50754	-1.35458	-1.12257	-1.57955	-1.16946	-1.79714	-1.71125	-1.95257	-0.900703	-0.401683	-0.975856	-0.0885222	-0.887941	-1.63919	-0.701014	-0.981833	-0.660739	-0.976111	-0.694868	-1.1302	-0.67099	-1.84868	-1.00561	-1.1789	-0.876752	-0.445214	-1.57955	-1.49433	-0.833685	-1.1104	-0.405454	-0.0642724	-1.93936	-2.27994	-1.28752	-1.51051	-1.89164	-1.2012	-0.989697	-0.51309	-0.461581
RVBD_0487	Rv0487	-	TRUE	FALSE	FALSE	FALSE	-0.378856	-0.528518	-0.722298	-0.724226	-0.857403	0.177538	-1.01747	-0.14124	-0.223036	-0.10852	-0.611881	-0.308689	-0.320979	-1.14926	-1.11951	-0.0633049	-0.369394	-0.474444	-0.477611	-0.806678	-0.391991	-0.717629	-0.631488	-0.576711	-0.106402	-0.887712	-0.292844	-0.822391	0.177538	-0.41142	-0.140473	-0.715879	-0.567043	-0.720374	-0.648763	-0.454524	-0.0180621	-0.147598	0.11083	0.0108239	0.118944	-0.46232	-0.249909
RVBD_1136	Rv1136	-	F	F	F	F	0.924495	-0.664799	0.457825	-1.22869	0.711669	-0.420367	0.226591	-2.53314	0.0476025	0.364601	-0.892166	-0.940709	-0.0763191	-0.136636	0.0343559	-0.260758	0.0115972	-0.690406	-0.272953	0.183231	0.0768533	-0.395735	0.255147	1.77035	-1.12061	0.2654	0.212124	-0.481121	-0.420367	-0.537541	0.0342771	-0.0257411	-0.0313519	-0.649229	0.518584	-0.00174777	0.505421	-0.463878	0.301075	-0.0239956	-0.109189	-0.324291	0.0193465
RVBD_2175c	Rv2175c	-	TRUE	FALSE	TRUE	FALSE	-0.42721	-0.210724	-0.533663	0.424665	0.242303	-0.660454	-1.04528	-0.203238	-0.32766	-1.07332	-0.516499	-0.454251	0.03796	-0.111747	-0.0967766	-0.05534	-1.09561	-0.0614466	-0.267017	-0.19969	-0.626888	-0.647062	-0.0671944	-0.20496	-0.296612	-0.788389	-0.573869	-0.654248	-0.660454	-0.323684	-0.440046	-0.585168	-0.333802	-0.703657	0.00104653	-0.806133	-1.41984	-0.344053	-0.751453	-0.259078	-0.462765	-0.552136	-0.839512
RVBD_2735c	Rv2735c	-	FALSE	FALSE	FALSE	FALSE	0.0431945	0.521727	0.129719	-0.111412	0.491809	0.267134	0.330656	0.234871	0.649816	0.228976	0.523037	0.636809	0.37642	0.485417	0.472482	0.974563	0.283034	-0.109116	0.251532	0.001056	0.17169	0.422948	0.366328	0.0538529	-0.193155	0.256821	0.35492	0.165734	0.267134	0.210502	0.118141	0.222882	0.118856	-0.359174	0.875902	0.361014	-0.0112039	0.207108	0.363561	0.107724	0.11528	0.187018	0.220927
RVBD_3770B	Rv3770B	-	FALSE	FALSE	FALSE	FALSE	0.43984	1.20975	0.124046	2.48085	0.686833	1.50157	0.268381	-1.23112	0.574819	-0.992668	1.50764	0.671595	-0.72575	1.24582	1.42658	-7.30591	0.433524	0.823982	0.107485	0.875107	1.20272	1.15419	1.61414	0.669801	1.33706	-0.57881	0.938424	-0.376671	1.50157	1.14292	0.631487	0.838677	0.737102	2.11118	2.2742	1.42828	-0.216889	1.07035	-0.990307	-0.131731	0.550268	0.889402	0.65582
RVBD_0998	Rv0998	mod05	TRUE	TRUE	FALSE	TRUE	-8.2571	-4.97773	-8.26387	-8.27022	-7.25262	-1.31488	-2.42367	-1.08846	-8.26419	-7.26696	2.12289	2.37941	-2.77337	-2.63612	-3.18096	-7.26002	-8.26942	-8.2685	-8.26882	-0.459968	-0.607007	-8.26701	-0.371314	-8.25044	-8.26068	-8.24666	-3.72989	-4.97052	-1.31488	-3.86159	-3.24974	-7.25616	-4.99847	-7.24995	0.291399	-3.80001	-8.26712	-8.25179	-8.25605	-3.53151	-8.26829	-3.13667	-4.48571
RVBD_3023c	Rv3023c	-	FALSE	FALSE	FALSE	FALSE	0.234879	0.313878	0.519521	-0.0597417	0.491464	0.398869	0.339403	0.271229	0.0698185	0.300349	0.464182	0.197114	-0.00103398	0.561999	-0.205016	0.654553	0.360711	0.171738	0.445104	0.223114	0.192792	0.353384	0.315704	0.13711	0.355737	0.34259	0.384659	0.468874	0.398869	0.0687926	0.564979	0.615719	0.40808	-0.36227	-0.05209	0.0369483	0.408837	0.130927	0.578091	0.439703	0.525335	0.279266	0.196352
RVBD_0600c	Rv0600c	-	F	F	F	F	-0.317529	0.272481	1.04113	-1.60116	1.15865	0.538165	0.532108	-1.69676	0.0628554	1.17369	1.20037	1.23756	0.14464	-1.62427	-4.43092	-3.27415	-1.17496	0.116417	-0.0048927	-0.431901	0.637714	0.696865	-2.8711	0.79481	0.388449	-0.517677	-0.392135	-0.22013	0.538165	-1.57017	0.281507	-0.884453	0.129045	-1.03399	1.3615	-0.936116	-0.140089	0.740979	0.357262	0.438474	0.624672	0.47613	0.523671
RVBD_3378c	Rv3378c	mod08	FALSE	FALSE	FALSE	FALSE	0.595592	1.40195	1.10334	-0.389385	0.803998	0.388737	0.595996	-0.0990454	2.01269	-0.551258	0.985054	0.472077	-1.51339	-1.35143	-1.5338	1.25979	0.00811497	-0.40846	1.18804	0.66069	0.809235	0.732016	-0.159175	-0.233316	0.662276	0.163746	1.07088	0.668081	0.388737	1.68887	0.714522	-0.499994	-0.0678902	0.889964	0.825463	0.483508	2.37592	0.706359	0.670139	0.879958	0.778678	0.157472	0.396136
RVBD_3541c	Rv3541c	-	FALSE	FALSE	FALSE	FALSE	-8.38942	-3.26292	-8.38672	-8.39142	-7.37726	-8.39033	-2.24246	-8.39641	-0.510667	-7.39241	-4.68374	-3.36715	-8.41018	-3.43986	-8.40023	-3.11189	-1.87318	-1.52092	-8.39625	-8.3842	-5.15491	-3.59082	-8.40258	-8.37348	-8.38302	-8.37792	-3.84636	-3.62061	-8.39033	-7.38231	-8.39198	-7.37639	-8.38798	-7.37337	-8.37882	-8.3991	-8.39505	-3.11194	-8.38082	-8.3864	-8.38125	-3.40061	-5.1494
RVBD_1752	Rv1752	mod05	F	F	F	F	1.17374	0.964142	0.538626	-3.75207	0.454854	0.449588	2.10414	-2.09274	0.369454	-0.016018	1.69392	1.74035	0.347225	-1.57796	-8.28853	-7.27585	-0.408356	0.466012	0.725668	1.54439	-0.545972	-0.0423558	-8.29099	0.312793	1.58272	1.82847	-0.458094	-0.608105	0.449588	0.65883	0.98435	-0.750683	0.102153	-0.273815	-0.682218	-2.6665	-2.60776	0.381098	-0.878356	0.524768	-0.807424	0.543142	0.52229
RVBD_0173	lprK	mod05	TRUE	FALSE	TRUE	FALSE	0.0455635	-0.109505	-0.311998	-0.794816	0.236798	-0.420733	0.151208	-0.246793	-0.46246	0.0522904	-0.594218	-0.475534	-1.1303	-0.991512	0.17596	-0.452273	-0.298883	-0.465931	0.16731	-0.677773	0.404666	-0.404898	0.0351784	0.496068	0.0289488	0.112988	-0.600635	-0.383459	-0.420733	-1.27666	-0.43747	0.0297625	-0.122197	0.45689	0.424328	-0.0929168	0.0578846	-0.106053	-0.945486	-1.47913	-0.819024	-0.212821	-0.394404
RVBD_1473	Rv1473	mod20	TRUE	TRUE	TRUE	TRUE	-1.86995	-1.43089	-2.18608	-0.709455	-3.52193	-2.12994	-1.58963	-0.646699	-1.42468	-9.75638	-0.654828	-0.587487	0.782143	-0.726332	-0.2243	-1.49277	0.6786	-0.477303	-1.30929	-1.62611	-0.718393	-0.863029	0.0913457	-0.530684	-0.70345	-1.29119	-1.91717	-1.31521	-2.12994	-2.44193	-1.98579	-2.39612	-1.11646	-2.62111	-1.10282	-1.45926	-0.848659	-2.45128	-2.78725	-2.23027	-2.01369	-1.82161	-2.40077
RVBD_3536c	hsaE	-	TRUE	FALSE	FALSE	FALSE	-0.98183	-0.286256	-0.531939	-0.128039	-0.252799	-0.582234	-0.433563	-0.215917	-0.968328	0.294026	-1.08787	-0.555606	-1.11368	-0.80614	-0.284206	-4.70704	-1.12373	-1.05935	-1.46195	-1.02258	-0.846289	-1.17789	-1.50158	0.858904	-0.223026	-0.564618	-0.753001	-0.339261	-0.582234	-1.79464	-1.09465	-1.33473	-0.683977	-1.18895	0.0588361	-1.98962	-0.298989	-0.0959733	-0.882962	-0.962745	-1.2702	-0.915078	-0.726141
RVBD_0018c	pstP	-	TRUE	FALSE	FALSE	FALSE	-3.87595	-0.329057	-4.53959	-7.81396	-0.689956	-3.53544	2.25752	-7.81587	0.551631	-6.81168	1.25368	1.1767	-1.33396	-1.65254	-7.82118	-6.80577	-2.53953	-0.216044	-1.37571	-0.924689	-0.909095	-7.81114	-2.8563	-1.62794	-7.80444	0.416323	-2.15237	-0.908998	-3.53544	-2.86262	-5.4032	-6.79747	-3.28682	-6.79432	-0.00438258	-7.82012	0.327791	-2.56764	-4.47943	-4.43939	-4.5242	-2.37023	-4.56675
RVBD_0043c	Rv0043c	-	TRUE	FALSE	TRUE	FALSE	-1.58109	-0.321898	-1.18547	-1.12889	-0.604807	-1.13254	-1.11492	0.00856663	-0.490777	-2.05876	-0.701605	-0.020978	-0.935571	-1.0345	-0.750743	-1.08421	-0.747056	-0.822107	-1.41121	-0.958728	-1.10826	-1.09863	-0.608062	-0.59445	-1.20266	-1.08657	-0.502203	-0.203582	-1.13254	-0.659975	-1.15795	0.179781	-0.537479	0.051718	-0.148273	-0.949208	-0.304372	-1.18596	-1.13378	-0.831321	-1.42195	-0.923188	-1.65311
RVBD_1070c	echA8	-	TRUE	FALSE	FALSE	FALSE	-0.941103	-0.454243	-0.821292	-0.130272	-0.746356	-0.633949	-0.984602	-0.357569	-0.361976	-0.592464	-0.588478	-0.974981	-0.388965	-0.59726	-0.589583	-1.26107	-0.85379	-0.583227	-0.380558	-1.02613	-0.316548	-0.325308	-0.751032	-0.47781	-0.439916	-0.400516	-0.210077	-0.102349	-0.633949	-0.25382	-0.21994	-0.327004	-0.441141	-0.557123	-0.218155	-0.228849	-0.496441	-0.0947924	-0.36875	-0.442958	-0.361741	-0.843179	-0.76777
RVBD_3413c	Rv3413c	mod06	TRUE	FALSE	FALSE	FALSE	-2.1749	-0.858271	-1.10881	-0.655931	-1.66462	-1.34467	-0.73744	-1.45784	-0.332204	-10.075	-0.798433	-0.0802864	-0.566935	0.0600428	-1.3784	-4.26302	-1.7277	-1.18988	-0.389151	-0.420201	-0.742892	-0.645689	-1.2942	-0.790031	-0.768609	0.249683	-0.613617	-0.423645	-1.34467	-0.480606	-0.510619	-0.186035	-0.663672	-1.11332	-1.87181	-2.0826	-0.536595	-1.35941	-1.48948	-0.885139	-0.91241	-0.431924	-1.0977
RVBD_1006	Rv1006	mod13	TRUE	FALSE	FALSE	FALSE	-0.569891	-0.282378	-0.592047	-0.279344	-1.16476	-1.01681	-0.171746	-1.36202	-0.260413	-1.09262	0.397099	0.0360747	0.446147	0.424502	-0.339823	-1.41531	-0.313794	-0.353656	-0.463625	-0.663676	-0.384178	-0.0772624	-0.606468	-0.501653	-0.527845	0.300499	-0.672933	-0.559238	-1.01681	-0.676205	-0.349234	-0.0142519	-0.287578	0.106796	-0.241715	-0.782017	-1.02297	-1.27471	-1.51171	-0.236298	-1.00908	-0.669677	-1.41122
RVBD_0033	acpA	mod05	TRUE	FALSE	FALSE	FALSE	-0.0623795	0.325746	-0.402366	-0.861373	-0.991138	-0.118743	0.813474	-1.43646	0.00453953	-8.7257	0.797124	0.617715	-0.411518	0.0246691	0.264219	0.447048	1.17512	-2.49612	0.259938	-0.42081	0.715551	-0.122956	-0.308847	-0.241356	-0.873606	0.0410982	-0.0287156	0.419661	-0.118743	-0.329712	0.512624	0.940623	-0.379891	-0.143787	0.108974	1.2587	1.29012	0.363354	-0.371247	0.491853	0.328167	0.683372	0.254516
RVBD_2635	Rv2635	-	TRUE	FALSE	FALSE	FALSE	-0.594235	-0.449718	0.284697	-1.64293	0.275698	-0.920486	-0.521994	-0.553741	0.414038	-2.49932	-1.17517	-0.855551	0.67468	1.06717	-2.44665	-3.57629	0.375165	-1.09273	-0.5773	-1.32953	0.211579	0.234747	-0.772944	-1.59615	-0.536342	-0.178299	0.737569	0.633708	-0.920486	-0.382967	-0.859539	0.135386	-0.423129	0.653097	-0.921337	-1.22209	0.0070601	-0.185461	-0.339366	-0.446279	-0.119517	0.0508148	0.0716088
RVBD_1213	glgC	mod11	F	F	F	F	0.00217226	0.440018	0.685046	-0.193155	0.468217	0.0236946	0.300131	-0.440017	0.334853	-0.0826462	0.616605	0.356002	0.690824	0.843496	0.558442	1.31106	0.0650919	0.953005	-0.0948499	-0.740932	0.59258	0.398338	-0.651553	0.206134	0.0545469	0.288801	0.16116	-0.0841952	0.0236946	-0.224654	0.174933	0.0405677	0.245387	-0.360709	-0.138249	0.268056	-1.35999	-0.518814	-0.174561	0.257707	-0.264101	0.103799	0.54724
RVBD_3007c	Rv3007c	-	F	F	F	F	0.247068	0.299642	0.156991	0.200738	0.395508	0.214122	0.105243	0.372654	0.07777	-0.11077	0.337698	0.325177	0.361466	0.133508	-0.762468	-0.217465	-0.0917379	0.378157	0.142356	0.382679	-0.0587209	-0.0259371	-0.0588573	0.39212	0.215967	-0.0652599	0.00247796	0.0252426	0.214122	0.291581	0.315158	0.185078	0.266217	0.107105	0.128215	0.433053	0.368582	0.222266	0.226944	0.178081	0.260815	0.188952	0.254075
RVBD_3272	Rv3272	-	TRUE	FALSE	FALSE	FALSE	-0.838614	-0.312627	-0.450247	0.028233	-0.38549	-0.530416	-0.668826	0.0692532	-0.160521	-0.42812	-0.464204	-0.626515	-0.103837	-0.696927	-0.537399	-1.06262	-0.355432	-0.577303	-0.640688	-0.444995	-0.331721	-0.14086	-0.58439	-0.178076	-0.396448	-0.444274	-0.441611	-0.263776	-0.530416	-1.03099	-0.359112	-0.364964	-0.357081	-0.832037	-0.404336	-0.550647	-0.628663	-0.840092	-0.761756	-0.388412	-0.251295	-0.553199	-0.361847
RVBD_3256c	Rv3256c	mod15	TRUE	FALSE	TRUE	FALSE	-1.95273	-0.377429	0.136909	-0.498287	-1.50617	-0.441397	-1.32839	-2.05391	-1.73159	-2.64933	-1.1924	-1.70133	-0.340273	-2.11532	-0.157615	-4.68695	-0.650378	-2.61624	-1.15757	-0.654453	-0.528851	-0.379529	-0.249398	-2.68837	-0.376273	-0.410091	-0.327336	-0.541848	-0.441397	-0.725571	0.170594	-0.273725	-0.205443	-2.44607	-1.47096	-0.679271	-3.9669	-1.25156	-0.902731	-0.124502	-0.0500853	-0.959624	0.0733181
RVBD_0813c	Rv0813c	-	F	F	F	F	-0.735677	-0.485755	-0.605852	-0.620131	-0.0937119	-0.625645	-0.416179	-0.603823	-0.475876	-0.274885	-0.458002	-0.0482061	0.0760611	0.291406	-0.0741985	0.211108	-0.19866	0.0163764	-0.545652	-0.296401	-0.560496	-0.369955	-0.351861	-0.471397	-0.252156	-0.339397	-0.373659	-0.654258	-0.625645	-0.311228	-0.65565	-0.0117328	-0.294821	0.247936	-0.5137	-0.309412	0.638514	-0.0957042	0.0901441	-0.541862	-0.336681	-0.305826	-0.614744
RVBD_1199c	Rv1199c	-	FALSE	FALSE	FALSE	FALSE	0.357222	0.433787	0.473771	-0.302069	0.686235	0.547579	0.255234	0.432496	0.367098	0.157917	0.479417	0.234111	0.169775	0.695045	0.0804631	0.588329	0.354988	0.275028	0.478476	0.139187	0.260754	0.296052	0.0563901	0.00729984	0.494783	0.548055	0.387527	0.541184	0.547579	0.0444703	0.619463	0.730673	0.577033	0.0185778	0.449007	0.28633	0.54895	0.188981	0.588278	0.379246	0.446723	0.317658	0.323347
RVBD_2030c	Rv2030c	-	FALSE	FALSE	FALSE	FALSE	0.0111767	-0.260294	-0.26577	0.0470316	-0.283487	-0.276816	-0.406747	-0.270513	-0.391695	-0.425898	-0.454808	-0.352136	-0.298644	-0.28283	-0.284371	0.0583925	-0.0983002	0.0814586	-0.31843	-0.200805	-0.0723942	-0.420392	0.322174	-0.287956	0.0304023	-0.323201	-0.51546	-0.169658	-0.276816	-0.542466	-0.28716	-0.505813	-0.249606	0.0688897	0.157132	-0.210315	-0.122187	-0.184938	-0.318282	-0.356435	-0.10469	-0.176132	-0.293469
RVBD_2827c	Rv2827c	-	FALSE	FALSE	FALSE	FALSE	-1.69247	-2.29389	-1.70228	-1.71114	-0.683294	-1.69401	-1.68188	-1.70579	-1.71153	-0.701551	3.66114	2.94293	6.64038	-1.69619	-1.70776	-0.700891	-1.70926	-1.70149	-1.69703	-1.70419	-1.71398	-1.70764	-1.69162	-1.68602	-1.69117	-1.69201	-1.70438	4.21164	-1.69401	-0.700058	-1.68909	-0.696525	1.56832	-0.679612	-1.68303	-1.69924	-1.70004	3.18602	-1.68404	-1.69979	-1.72239	-1.68726	-1.70258
RVBD_1181	pks4	mod07	FALSE	FALSE	FALSE	FALSE	-0.00437453	0.121839	0.127761	0.300097	-0.0176959	-0.0199438	-0.30528	-0.0250334	-0.0948341	-0.371051	-0.292047	-0.394223	-0.115721	-0.176639	-0.0731379	-0.54801	0.193169	0.139704	0.14659	0.025222	-0.0583782	-0.164141	-0.454127	0.0885303	0.104173	2.75145e-05	0.0350722	0.0407226	-0.0199438	0.215557	0.0133843	0.00817698	0.190561	0.103967	0.0230327	-0.0858549	-0.113959	0.147676	0.17797	-0.0234256	-0.0135779	0.00800776	-0.00781042
RVBD_3563	fadE32	mod03	TRUE	TRUE	TRUE	TRUE	-0.998807	-1.49333	-1.3982	-0.935401	-0.854166	-1.52883	-2.0818	-2.92356	-0.0395473	-0.917741	-0.778695	-0.249965	-3.01521	-1.45282	-0.643441	-2.10498	-1.47253	-1.63003	-2.25131	-2.17827	-1.21335	-2.10278	-1.34181	-1.3028	-2.36707	-1.13337	-1.26456	-1.81222	-1.52883	-2.37133	-1.1417	-0.0450011	-1.01737	-0.488833	-0.714342	-1.36376	-1.20301	-1.56577	-2.01533	-1.20906	-2.11962	-1.65649	-1.80093
RVBD_0177	Rv0177	mod05	TRUE	FALSE	TRUE	FALSE	0.644461	-0.363479	-0.234605	-0.301211	0.471766	-0.684309	0.669098	-0.47243	-0.77545	0.0594828	-0.799871	-1.0516	-0.97547	-1.19106	-0.891424	-0.843977	0.175144	-0.672513	-0.21569	0.196176	0.528764	-0.364458	-0.0801054	0.596272	0.145529	0.0160363	-0.343924	-0.489841	-0.684309	-0.96926	-0.590046	0.312528	-0.0749831	-0.387302	0.217601	-0.266791	0.290775	-0.273372	-0.553709	-1.29444	-0.824398	-0.437669	-0.500094
RVBD_1860	apa	mod06	TRUE	TRUE	FALSE	FALSE	-1.67076	-1.26385	-0.128442	-0.458319	-1.33846	-1.10218	0.141769	-1.55071	-0.181158	-2.17082	-0.653365	-0.243993	0.101515	0.752817	-0.717264	-1.96013	0.470067	-0.82163	-0.447876	-0.54728	-1.1912	-0.647183	-2.05275	-0.471133	-0.648319	-0.53994	-0.227501	0.0517741	-1.10218	0.189153	-0.384466	-1.53871	-0.408111	0.399843	-0.419141	-2.28711	-0.848573	-0.482917	-1.05154	-0.658298	-1.16147	-0.452694	-1.6029
RVBD_0019c	fhaB	mod17	TRUE	TRUE	TRUE	FALSE	-1.72284	-2.49457	-1.43001	-7.70285	-1.44884	-7.69603	2.07255	-7.70356	1.49226	-0.378173	1.28176	1.39262	-0.650144	-1.19656	-7.71027	-6.69512	-2.17365	-7.70503	-4.36525	-7.69238	-2.40634	-7.69847	-7.71002	-7.68203	-0.951285	-7.68907	-2.91173	-2.29434	-7.69603	-6.69165	-1.22186	0.894078	-3.18823	-6.67842	-7.68919	-7.70872	1.42201	-1.53192	-1.40736	-2.83212	-1.5845	-1.19026	-1.99379
RVBD_0949	uvrD1	mod20	FALSE	FALSE	FALSE	FALSE	0.591962	0.441507	-0.291583	1.62641	-0.325028	0.544102	1.4391	0.500496	-6.5689	-5.58266	2.57973	2.8203	1.58787	2.83194	-1.49446	-5.57288	-0.472831	-2.14193	0.582962	2.36409	1.63562	-0.922049	0.857595	-6.56368	2.02826	-6.56026	-0.00979816	0.23678	0.544102	3.19245	-0.122504	-0.114144	-0.0378131	-5.56502	-6.5631	1.05064	2.82089	0.175773	0.891068	-1.08142	1.47681	-0.246642	1.19654
RVBD_3399	Rv3399	mod20	F	F	F	F	-0.0750038	0.0808814	0.283237	0.254117	0.00581032	-0.627903	-0.0872987	0.471354	0.907754	-3.39545	0.706394	0.655822	0.571964	0.661363	0.511184	-2.13991	-0.656264	-0.127395	-0.54384	0.193133	0.427079	-0.0174395	0.701195	0.284367	-0.0505038	0.415357	0.295769	0.0464528	-0.627903	0.716504	-0.050005	0.0910755	0.223435	0.357069	0.465986	0.0408669	-0.94185	0.0575576	-0.107384	0.194317	0.164861	0.579425	-0.086068
RVBD_0692	Rv0692	-	FALSE	FALSE	FALSE	FALSE	-0.718517	-0.360072	-0.953094	-0.306007	-1.35577	-1.40786	-0.922779	-0.206919	-1.42103	-0.960069	-0.849835	-0.61031	-1.04907	-0.887864	-0.439013	-0.506505	-0.831381	-1.03862	-0.818324	-0.541735	-0.765871	-0.686428	-0.962521	-0.854443	-0.322497	-0.167753	-0.303665	-0.544673	-1.40786	-0.483891	-0.889729	-1.35119	-0.80372	-0.659147	-1.24414	-0.91495	-0.419539	-0.81789	-0.664021	-1.2535	-1.21851	-0.816381	-0.477933
RVBD_2475c	Rv2475c	-	TRUE	TRUE	FALSE	FALSE	-1.46848	-1.9614	-0.906102	-0.724068	-1.9059	-0.784011	-1.20387	-0.475072	-1.20333	-1.86114	-1.1669	-1.21476	-1.25047	-1.3627	-0.453416	-2.17256	-0.864856	-0.631234	-1.2143	-1.02912	-1.58005	-1.2585	-1.24171	-1.06162	-0.765865	-0.886956	-1.35366	-1.72346	-0.784011	-1.25759	-0.732811	-0.829908	-1.43855	-1.09761	-1.98017	-2.18399	-1.13136	-1.42834	-0.952456	-0.95467	-1.48121	-1.12379	-1.30072
RVBD_2859c	Rv2859c	-	TRUE	TRUE	FALSE	FALSE	-1.18501	-1.35304	-0.759473	-0.720107	-1.1848	-0.620392	-1.57492	-1.38789	-1.08022	-0.2353	-0.727838	-0.599481	-0.911239	-0.925724	-1.19276	-1.364	-0.813625	-0.661141	-1.03384	-0.647412	-0.70923	-0.811863	-0.629769	-0.785937	-0.440832	-1.64634	-1.04682	-0.824143	-0.620392	-0.416054	-0.531475	-1.20052	-0.929224	-1.05865	-1.28706	-0.451364	-1.38374	-0.878898	-0.484048	-0.548686	-0.744214	-0.763534	-1.1796
RVBD_3717	Rv3717	mod18	TRUE	TRUE	TRUE	TRUE	-3.57232	-3.19192	-2.85547	0.18371	0.0285937	-3.41928	-0.42916	-2.4129	-1.89187	-9.5404	-0.838821	0.0310539	-1.17853	-2.62385	-3.89686	-9.53104	-3.52549	-2.15894	-1.44112	-1.55369	-2.45813	-1.15943	-4.91035	-2.76351	-2.37999	-1.97956	-2.88079	-2.57713	-3.41928	-4.23667	-2.16014	-0.826359	-2.28179	-3.01794	-1.93872	-2.38766	-3.40463	-2.28435	-3.39053	-1.84865	-1.77696	-2.33945	-2.92945
RVBD_1471	trxB1	-	FALSE	FALSE	FALSE	FALSE	-3.84476	1.21895	-0.152162	2.09401	1.40435	1.15414	1.73096	0.180926	0.495072	2.30021	1.85342	-0.326977	1.305	0.460792	-7.79697	-6.7814	-7.78646	0.441732	1.2352	1.2706	0.479848	0.889717	0.455516	1.26184	-0.462067	-0.100812	1.35085	1.08339	1.15414	1.36245	-0.0536588	0.907511	-0.13297	1.67877	1.95681	1.0556	2.37096	1.05166	1.36625	1.09956	0.184985	0.553837	0.760267
RVBD_1616	Rv1616	mod13	F	F	F	F	0.248331	0.671117	0.117366	0.664917	-0.167967	0.400186	1.02153	0.928552	0.514845	-0.422727	0.793602	0.644567	0.0936672	-1.94257	-0.457715	-1.61551	0.0864342	0.0188559	0.426625	0.355725	0.132745	0.0449413	0.779332	0.268422	0.306174	-0.0726605	0.275655	0.188077	0.400186	-0.462713	0.238562	0.621089	0.132117	1.21432	0.678314	0.74904	0.397187	0.72943	0.714088	0.267688	0.747394	0.37655	0.8176
RVBD_1421	Rv1421	mod08	FALSE	FALSE	FALSE	FALSE	-1.66169	0.233337	-6.29167	-0.78947	-5.27455	-2.02007	3.20706	-0.10679	-6.27725	-5.29711	1.74687	2.24829	2.90046	0.495796	1.55999	3.36828	-2.29375	1.61637	-6.29843	-6.28755	-1.82287	-0.110205	2.25825	-0.111257	0.729611	-6.2804	-6.28882	-0.195692	-2.02007	-5.28747	0.819198	-0.180786	-0.95836	2.83375	-6.28272	-6.30237	-6.29828	-0.0538247	-0.389931	-3.03582	-6.28526	1.55326	-3.04537
RVBD_0406c	Rv0406c	mod06	TRUE	TRUE	FALSE	FALSE	-1.68373	-1.23184	-1.35564	-1.39762	-0.781766	-1.01879	-1.54929	-0.430017	-2.02337	-1.04736	-0.603649	-0.42313	-0.101473	0.036501	-0.819899	-2.05085	-0.795444	-1.05088	-0.889461	-0.479738	-0.546419	-0.236206	-0.67809	-0.959217	-0.390869	-0.900019	-0.848775	-0.393638	-1.01879	-0.378654	-0.472237	-0.623599	-0.676295	-0.371861	-0.0331552	-1.60132	-1.49765	-0.812005	-1.39416	-0.490084	-0.882221	-0.650505	-1.06822
RVBD_3117	cysA3	-	TRUE	FALSE	TRUE	FALSE	-0.22548	-0.404713	-0.427112	-0.337239	-0.450226	-0.1029	-0.177975	-0.218394	-0.680954	-0.831565	-0.34399	-0.260026	-0.473456	-0.484487	-0.804039	-0.320325	-0.332793	-0.328877	-0.344777	-0.619777	-0.326802	-0.419263	-0.598354	-0.654256	-0.130522	-0.1385	-0.228687	0.0418784	-0.1029	0.00106522	-0.387928	-0.447429	-0.234381	0.0543927	-0.093698	-0.122517	0.0412257	-0.408843	-0.224652	-0.35874	-0.379959	-0.256707	-0.494133
RVBD_0076c	Rv0076c	-	FALSE	FALSE	FALSE	FALSE	0.381917	-0.221455	0.239457	0.0264774	0.955901	0.321185	0.397906	-0.290901	-0.0793962	0.0427344	0.75099	0.786523	-0.159381	0.339879	0.0969873	-0.559043	0.0730541	0.43686	0.0346858	0.468345	-0.00620143	0.41126	-0.099897	-0.338401	0.352335	0.51843	0.324821	-0.0828668	0.321185	-0.00942749	0.00310812	0.0902675	0.45756	0.987905	0.393968	0.439439	-0.740278	0.450215	0.130853	0.384386	0.506847	0.327792	0.114415
RVBD_0975c	fadE13	-	FALSE	FALSE	FALSE	FALSE	-0.01638	0.0794667	0.0083531	0.112528	0.451429	0.533555	-0.000518132	0.529212	-0.151464	-0.644287	0.481899	0.534844	0.128935	-0.224379	-0.122763	-0.234833	0.00828444	0.203693	0.169318	0.258945	-0.188382	0.163401	0.225403	0.281104	0.0282542	-0.300107	0.14437	-0.100528	0.533555	-0.197982	-0.155052	-0.0660185	0.0786757	-0.436556	-0.356014	0.0757471	-0.395338	0.264287	0.0856055	0.0346186	0.312809	0.141389	0.100692
RVBD_3300c	Rv3300c	-	FALSE	FALSE	FALSE	FALSE	-0.141958	-0.348787	-0.385336	0.739983	0.0884639	0.173622	0.933157	0.345759	-0.639571	-1.08818	0.870426	0.510193	0.209662	0.86545	0.129034	-1.2827	0.104826	-0.900155	-0.040316	-0.783136	-0.492027	0.0516423	-0.122132	-0.478298	-0.12571	-1.53834	-0.0261319	-0.0487105	0.173622	0.920847	0.0952225	-0.0942127	0.209726	1.12812	-0.0151147	-0.0436209	0.21602	-0.202999	-0.496462	-0.0123078	-0.0368259	0.10168	-0.000947267
RVBD_0983	pepD	mod05	TRUE	TRUE	TRUE	FALSE	-1.83704	-1.56277	-0.867063	-1.63692	-1.15843	-0.983322	0.305697	-1.51589	-0.86474	-10.2541	-0.691405	-0.0614343	-1.11741	-0.827408	-1.29279	-3.16801	-2.78947	-1.69966	-0.292084	-0.956422	-1.22565	-0.906938	-0.955741	-1.07285	-1.67064	-0.464419	-0.841276	-1.04487	-0.983322	-0.0380446	-1.04811	-0.352382	-0.827929	-0.385125	-0.700913	-1.16332	-1.11164	-0.505652	-1.3617	-0.895275	-0.868884	-1.32729	-0.90129
RVBD_1357Ac	-	-	FALSE	FALSE	FALSE	FALSE	-5.08919	-1.79343	-5.09175	-5.08856	-4.06308	-1.7791	3.53012	-5.09378	-5.07578	-4.10213	2.55458	0.89772	-5.10913	-5.09722	-5.10415	-4.0882	-5.09615	-5.10203	-5.09612	-1.2444	-5.09863	1.94334	-5.09131	-5.08037	1.8602	-5.07747	-1.26604	-5.09764	-1.7791	-0.696698	-5.09392	-4.08285	-5.09219	-4.08546	-5.08343	-5.09732	-5.09776	-0.263735	-5.09594	-5.1019	-0.240597	1.18254	-5.11597
RVBD_0168	yrbE1B	mod05	TRUE	FALSE	TRUE	FALSE	0.408159	0.0406679	-0.23801	-0.598814	0.59131	-0.367953	0.248892	0.261337	0.0794225	0.225082	-0.432118	-0.290145	-0.473339	-0.805101	-0.218205	-0.0878202	0.0541882	-0.119021	0.0665104	-0.232957	0.518598	-0.36662	-0.0170837	0.325574	0.18273	0.0296714	-0.247456	-0.371839	-0.367953	-1.17212	-0.384021	-0.184185	-0.107376	0.237093	0.477738	-0.0447791	-0.929715	-0.318415	-0.911933	-1.20222	-0.675467	-0.390873	-0.277232
RVBD_3005c	Rv3005c	mod06	TRUE	TRUE	TRUE	TRUE	-4.89919	-2.44039	-2.81295	-3.07166	-2.53776	-1.32517	-1.95648	-0.94879	-1.29498	-4.60663	-0.545891	0.255288	-0.55153	-1.08942	-1.01972	-4.7014	-4.54453	-2.66578	-1.32141	-0.975589	-1.51325	-1.34499	-1.70256	-2.27143	-1.23826	-1.14544	-2.07615	-1.41749	-1.32517	-1.46126	-1.08397	-1.72698	-1.00974	-0.160474	-0.244842	-2.3151	-1.20505	-1.25574	-1.52879	-1.1878	-1.25252	-1.5537	-1.71449
RVBD_3041c	Rv3041c	-	TRUE	FALSE	TRUE	FALSE	-0.464833	-0.184096	-1.21698	-0.920727	-0.590817	-0.505369	-1.30054	-0.704984	-0.614363	-1.20108	-0.766769	-0.541159	-1.98174	-0.399402	1.04202	0.345296	-1.01686	-0.381357	-1.28394	-0.0520973	-0.0940705	0.00578891	-0.639882	0.375984	0.556984	0.205995	-0.622619	-0.465507	-0.505369	0.719765	-0.348913	-0.870459	-0.390453	-0.0753828	0.962263	-0.310601	-0.589103	-0.466828	-0.26487	-0.700728	-0.56116	-0.743138	-0.982865
RVBD_3777	Rv3777	-	FALSE	FALSE	FALSE	FALSE	0.22805	0.224736	0.50823	0.678809	0.425727	0.170514	0.495686	0.0576842	-0.318643	0.665214	0.539657	0.298133	0.179548	0.110225	0.0107806	0.163143	0.396453	0.243157	0.427729	0.498802	0.407362	0.427398	0.278044	0.418313	0.128113	0.140761	0.780537	0.624511	0.170514	0.814494	0.337924	0.607504	0.642199	0.92778	0.500345	0.347629	0.133517	0.414961	0.341747	0.237313	0.340628	0.722078	0.490466
RVBD_2028c	Rv2028c	-	FALSE	FALSE	FALSE	FALSE	-0.0239885	-0.208335	-0.037256	0.115294	-0.0105995	-0.0409238	-0.113526	-0.10134	-0.093787	0.154683	-0.667936	-0.377331	-0.338865	-0.456936	-0.772318	-0.931525	-0.0296755	-0.173436	-0.165929	-0.11232	0.0373435	0.27003	-0.379783	0.0791862	-0.59094	-0.0590375	-0.23226	0.0563467	-0.0409238	-0.723544	0.0446304	0.118189	0.095748	0.570391	0.159102	-0.488894	0.188094	-0.336123	0.0292614	0.21617	-0.00693116	-0.275026	-0.0714423
RVBD_2107	PE22	-	FALSE	FALSE	FALSE	FALSE	-0.347169	-0.0948958	0.494661	0.292773	1.62654	0.447345	0.36512	1.09966	-0.0517563	-1.59052	0.65204	0.267278	0.134445	-0.0947595	0.72397	-0.152268	-0.568164	-0.308528	0.852396	0.710256	0.174674	0.507694	0.440151	0.540019	0.94281	0.183783	-0.0402467	-0.262133	0.447345	-0.078955	0.054882	0.992007	0.357687	0.176569	0.784877	0.529946	-0.0536122	0.0870855	0.581445	0.0780864	0.420451	-0.00896813	0.359583
RVBD_0178	Rv0178	mod05	TRUE	FALSE	TRUE	FALSE	0.0932182	-0.450305	-0.222495	-0.778816	0.277374	-0.597214	0.00920683	-0.426017	-0.0476367	0.261702	-0.871784	-0.92014	-1.0888	-0.866919	-0.105068	0.00821259	-0.338044	-0.509423	-0.307814	0.0827439	0.377903	-0.347717	-0.243536	-0.0427362	-0.242295	0.129241	-0.24742	-0.534506	-0.597214	-1.17248	-0.622736	-0.704518	-0.197107	-0.199298	0.30563	0.0255741	-1.21934	-0.521073	-1.1465	-1.44231	-0.861342	-0.238703	-0.434073
RVBD_2023A	-	-	F	F	F	F	0.26627	0.307525	0.482734	-0.347908	0.476199	0.162963	-0.139037	-0.967837	-0.12565	-3.34493	0.702558	0.203301	0.100623	0.675461	-0.738451	-1.58604	-0.654523	-0.102241	0.281134	-0.0169266	-0.405401	-0.0697921	-0.0812733	-0.684398	-0.100221	-0.440498	0.264453	-0.016805	0.162963	-1.20861	0.011786	0.261769	0.0398583	-0.616324	-0.686318	0.296679	-0.151953	-0.0562315	0.238789	0.36918	-0.35192	-0.419382	-0.184308
RVBD_0505c	serB1	mod05	FALSE	FALSE	FALSE	FALSE	0.84609	0.14335	-0.880011	-7.14891	-0.0232196	0.293869	0.00461122	0.655682	1.00637	-6.14874	1.78025	1.49726	-1.12442	1.46226	-7.15446	-0.906656	1.33797	1.35765	-0.507401	0.382608	-3.91408	-0.0208465	-0.573281	-0.758571	-7.13896	-7.13525	-0.647048	-0.223884	0.293869	-2.74236	-0.896903	-0.678679	0.565814	2.41272	-7.13281	-0.397057	-1.86344	-0.832551	0.291385	-0.707722	-0.325624	1.31907	-0.705131
RVBD_3478	PPE60	-	FALSE	FALSE	FALSE	FALSE	-0.489424	-0.322751	-0.0677362	0.180806	-0.245817	-0.0635887	0.0304613	-0.226154	-0.388703	-0.69136	-0.468376	-0.0693619	-0.16867	-0.191561	0.297261	0.017301	0.0762926	-0.163459	-0.0690979	0.0080815	-0.306863	-0.221378	-0.274437	0.184476	-0.0358857	0.132012	0.0276636	-0.164765	-0.0635887	-0.0382823	-0.00286442	-0.103668	0.170034	-0.00490891	-0.304593	-0.325826	0.250589	-0.224164	-0.0211459	0.0607546	-0.0895931	-0.0333973	-0.260709
RVBD_0170	mce1B	mod05	TRUE	FALSE	TRUE	FALSE	-0.0515083	-0.464777	-0.211313	-0.171545	0.0062769	-0.691531	0.589396	-0.334621	-0.512992	0.00333205	-0.497499	-0.959955	-1.48359	-1.53953	-0.945066	-0.936009	-1.60361	-0.240744	-0.100539	-0.600016	0.409381	-0.808518	-0.171518	0.484554	-0.047919	0.114731	-0.469129	-0.651032	-0.691531	-1.61542	-0.513828	-0.194607	-0.1088	-0.669659	-0.039741	-0.47628	0.314797	-0.553139	-1.09571	-2.05054	-1.10113	-0.636413	-0.361011
RVBD_3416	whiB3	-	TRUE	FALSE	TRUE	FALSE	-0.399598	0.192669	-0.852578	0.0649833	-0.272107	-1.66035	0.180097	0.435813	-0.618892	-1.78416	-1.16348	-0.580317	-1.09207	-0.591315	-1.61697	-9.08893	-0.296468	-0.627958	-0.626186	-0.544875	-0.253246	-0.372755	0.529199	-0.525651	-1.06101	0.206921	-0.565094	-0.733428	-1.66035	-0.526176	-0.785579	-0.503601	-0.735617	0.821353	0.23242	0.17076	-0.16008	-0.810163	-1.12705	-0.982637	-1.11433	-0.390838	-0.761447
RVBD_0017c	rodA	mod04	TRUE	FALSE	FALSE	FALSE	-0.585231	-0.758161	-0.679251	-1.58402	-0.52172	-0.524158	-1.25694	0.508367	-0.317303	-8.5461	0.749575	0.613777	0.327889	-0.205399	0.550139	-0.754836	-0.349534	0.684345	-1.07299	-0.316026	-0.878669	-2.32764	-0.837467	-1.36469	-0.512072	0.159966	-1.32201	-0.171861	-0.524158	-2.1799	-0.279572	-0.350134	-0.192944	0.414195	0.0861688	0.0846994	0.357253	-0.870672	-1.2541	-1.38235	-1.91314	-0.625662	-1.44719
RVBD_3262	fbiB	mod06	FALSE	FALSE	FALSE	FALSE	8.17425	6.54151	5.78186	NA	8.80148	7.14233	NA	NA	NA	NA	6.40926	6.55631	6.53936	6.71752	7.53281	NA	NA	NA	4.88891	6.37171	7.68743	7.85514	8.32263	NA	NA	NA	7.84635	6.45327	7.14233	7.22207	7.99885	7.21669	8.66395	NA	NA	5.92548	NA	8.4367	8.15771	6.31709	4.8615	7.97201	4.83018
RVBD_3271c	Rv3271c	mod08	FALSE	FALSE	FALSE	FALSE	-0.373165	0.639422	0.888271	0.565725	0.15823	0.610912	1.37082	-6.97127	0.827894	0.354514	1.55459	1.91496	0.858379	1.36475	-2.84271	0.474111	-0.858024	1.03243	-1.44479	-6.9601	0.787576	-1.31262	-0.365107	-0.577513	-1.78667	0.674757	-0.794674	-2.44483	0.610912	2.93202	-0.830877	-2.02043	0.254021	1.04237	-6.94648	1.23346	0.612842	-0.913138	0.179403	-0.155461	-0.874497	-0.317103	-0.751208
RVBD_3101c	ftsX	-	FALSE	FALSE	FALSE	FALSE	NA	4.88568	NA	NA	NA	NA	6.84794	7.7763	NA	NA	8.70786	9.98505	5.04458	NA	NA	NA	NA	6.02773	NA	NA	NA	NA	NA	NA	NA	NA	NA	4.87258	NA	NA	NA	NA	NA	NA	NA	NA	NA	NA	NA	NA	NA	NA	NA
RVBD_3631	Rv3631	mod06	TRUE	FALSE	TRUE	FALSE	-0.0208541	-0.993366	0.0379333	0.018242	-0.283096	-1.15386	0.150262	-0.130113	0.0223117	0.506391	-0.885232	-0.540213	-2.83238	-2.14718	0.180063	1.70829	-0.995445	-0.754456	-1.56328	-1.03892	-0.890784	-1.76218	-2.01388	-0.748821	-1.9085	0.0670646	-0.556646	0.0381587	-1.15386	-0.627272	-1.18546	-0.603004	-0.399717	-1.02196	-3.54917	-0.739924	-0.459899	-1.30943	-1.25738	-0.631738	-1.34973	-0.497535	-1.06002
RVBD_1745c	idi	-	F	F	F	F	0.436994	0.276624	0.271774	-0.693059	0.303883	-0.184476	-0.571949	-1.65919	1.20385	1.4285	1.00262	0.993903	0.595764	1.6526	0.922228	0.794512	1.25366	-0.518029	0.592788	0.157149	0.551925	-0.458689	-0.597	0.43863	-0.594486	-0.213914	-0.155336	0.38804	-0.184476	-1.76707	0.682755	-1.13393	-1.30045	-2.58308	1.15144	1.14601	0.669901	0.0506732	0.396202	-1.28474	-0.536784	-0.177033	-0.190077
RVBD_2473	Rv2473	mod07	F	F	F	F	-0.237368	-0.401481	-0.0550409	-1.05065	0.0874893	-0.424573	-0.475944	0.0438462	-0.0589682	-0.0948222	-0.460394	-0.462868	-0.088421	-0.294541	0.130225	0.226582	0.14731	-0.0521543	-0.405442	0.214057	0.15515	0.0594214	0.045615	0.452851	0.307721	-0.148446	-0.012183	0.0547765	-0.424573	-0.0164994	-0.148134	-0.209096	-0.0723934	-0.287527	-0.252735	0.265335	-0.7534	-0.145368	0.0904281	-0.0483999	0.0984417	-0.0712433	0.111114
RVBD_0215c	fadE3	-	FALSE	FALSE	FALSE	FALSE	0.107202	0.34682	0.217423	0.316355	0.529137	0.416191	-0.0157849	0.628709	0.303729	-0.122016	0.511417	0.607035	0.0559428	0.264379	-0.0139954	0.242093	0.363283	0.0313894	0.192629	-0.106748	0.0220232	-0.0310024	-0.0580362	0.296006	0.110368	-0.0503533	0.161526	0.158405	0.416191	0.17018	-0.0901307	-0.0364036	0.249701	0.291132	-0.531616	0.13732	-0.231286	0.213052	-0.0793643	0.0926396	0.293739	-0.0270619	0.0667701
RVBD_0303	Rv0303	-	F	F	F	F	-0.461455	-0.380286	-0.112235	-0.524401	-0.0379037	0.0790877	-0.197622	0.124238	-0.304958	-0.484098	-0.390956	-0.0690449	-0.0854557	-0.0725805	-0.0907621	-0.219838	-0.810579	-0.309209	-0.2426	-0.243649	-0.330981	-0.229626	-0.162215	-0.164547	-0.0808096	-0.208342	-0.162365	-0.139494	0.0790877	0.215987	-0.134095	-0.362668	-0.208793	-0.100137	-0.10201	-0.168213	-0.416921	-0.0117617	-0.271744	-0.237025	-0.0638362	-0.304248	-0.208595
RVBD_0848	cysK2	-	F	F	F	F	0.0658257	-0.300032	-0.0178963	0.428484	0.396489	-0.334753	-0.739428	-0.23173	0.0842689	0.281473	-0.539031	-0.932977	-0.0619925	0.0113037	-0.0741486	0.193747	-0.898489	-0.262816	-0.330405	0.0526795	-0.036536	-0.445279	-0.289209	-0.682473	-0.151434	0.195978	0.0298035	0.00586278	-0.334753	0.056138	-0.175023	-0.424413	0.0542965	0.22731	0.354313	-0.0190617	-0.667902	-0.021635	-0.122083	-0.0754666	-0.193121	0.0286291	-0.113088
RVBD_0911	Rv0911	-	FALSE	FALSE	FALSE	FALSE	0.390881	0.467815	0.10214	0.887464	0.137819	0.403476	0.356271	0.195403	-0.468116	-0.553947	0.638846	0.71917	0.443471	-0.367097	-0.00845702	0.312077	0.604296	0.363178	0.396546	0.0840223	0.0534145	-0.0542321	0.605367	0.036707	0.1788	-0.0601633	0.132919	0.173348	0.403476	0.279326	-0.00945937	-0.0228102	-0.132305	0.86266	0.00518215	0.382592	0.423453	0.341589	0.271618	0.289379	0.0873397	-0.0283315	0.312749
RVBD_3066	Rv3066	-	FALSE	FALSE	FALSE	FALSE	-0.0226276	-0.840605	0.0696621	-0.141583	-0.0364691	-0.121732	-0.276211	-0.277361	-0.758922	-1.07476	-0.698653	-0.0381452	-0.336346	0.525999	0.334706	-0.719261	-0.328318	0.276668	0.791374	0.0184797	0.327226	0.655414	0.0879639	-0.217261	-0.286221	-0.367285	-0.0753348	-0.217072	-0.121732	-0.0202954	0.164776	-0.363279	0.418823	0.215657	-0.312571	-0.232269	-0.113777	0.477217	-0.0464668	0.318536	-0.458477	0.657779	-0.176156
RVBD_3564	fadE33	mod05	TRUE	FALSE	TRUE	TRUE	-2.41119	-1.52603	-4.25238	-6.21459	-3.5477	-2.78877	-1.0104	-3.61198	-5.66237	-8.80055	-1.0615	-0.143603	-5.41961	-9.80121	-1.75195	-8.79383	-4.05472	-4.67547	-3.92401	-5.00554	-1.41141	-3.70693	-3.88497	-1.65605	-5.87664	-2.09155	-2.11013	-1.41595	-2.78877	-3.49774	-1.83472	0.237718	-2.45321	-8.78197	-9.78698	-1.79896	-1.28767	-1.57922	-3.14448	-4.44688	-5.27874	-2.5521	-3.28207
RVBD_3058c	Rv3058c	-	TRUE	FALSE	FALSE	FALSE	-0.436887	-0.296658	-0.622106	0.0205942	-0.279436	0.142634	-0.545519	0.258295	-0.271727	-1.17721	-0.596275	-0.213525	-1.11162	-0.62718	-0.833482	-2.02039	-0.632687	-0.960857	-0.0380205	-0.198715	-0.108611	0.0484695	-0.0604412	0.404338	0.135285	-0.113026	0.0220761	0.171469	0.142634	0.321548	-0.0296133	-0.0852786	0.126378	-0.666552	0.366661	0.317412	-0.522592	0.0796795	-0.377131	0.146322	-0.0785521	-0.239892	-0.222201
RVBD_1507A	Rv1507A	-	F	F	F	F	0.28717	0.219219	0.654332	-0.266907	0.240876	0.486631	0.74051	-0.519301	0.701036	-1.31605	0.937996	0.324543	0.562578	0.592171	-2.38192	-0.492919	-0.643755	0.54101	0.239049	0.355766	0.273064	0.214432	0.957709	0.737706	0.76879	-0.240404	0.285769	0.160235	0.486631	-0.282717	-0.19588	-0.064432	0.0755114	-2.65286	0.138113	0.252816	0.163469	0.000256139	0.769807	0.635816	0.415737	0.19067	0.190521
RVBD_1373	Rv1373	-	FALSE	FALSE	FALSE	FALSE	0.0368521	0.0233097	0.0250558	0.231998	-0.204464	0.0892708	0.220362	0.0165515	-0.185939	-0.318571	0.398073	0.255034	0.0727922	-0.176777	0.105989	0.377282	-0.51056	0.166405	0.0866682	-0.0926907	0.0740461	-0.0706823	0.0695714	0.0992879	0.203549	0.114934	0.0406279	-0.0343478	0.0892708	0.0283319	0.0248343	0.0367102	0.0776968	-0.466395	0.0431062	0.249832	-0.0931239	0.127673	0.0421925	-0.0131544	-0.0421597	0.168569	0.00142932
RVBD_3919c	gid	-	F	F	F	F	-0.671844	-0.345863	-0.288155	0.721202	-0.32002	-0.539815	0.684944	-0.298794	0.663403	-1.12467	0.853874	0.443577	0.430412	-0.108989	-0.25888	-8.4286	-0.79264	0.430521	-0.247962	0.172647	-0.3768	-0.976109	-1.08041	-0.847706	0.101258	0.319689	-1.05991	-0.138095	-0.539815	-1.35548	-0.048375	-0.463748	-0.864955	-1.91071	-1.83487	-0.99032	0.285145	0.0275113	0.0318904	0.171476	0.370272	-0.930648	-0.137446
RVBD_1505c	Rv1505c	-	FALSE	FALSE	FALSE	FALSE	0.715241	0.135243	-0.0920532	-0.411126	1.15941	0.200369	0.450141	-0.00494653	0.0829288	0.842748	0.79623	0.861411	-0.647381	-0.718698	0.394628	-0.268088	0.330281	0.69496	-0.103947	-0.296678	0.185512	-0.223798	-0.0573521	-0.14664	0.374258	0.268324	0.19173	0.859005	0.200369	0.253072	-0.0773302	0.136109	0.191305	-0.840282	0.491953	0.53393	0.289018	0.259559	0.30584	-0.113948	0.333365	0.529593	0.193332
RVBD_3562	fadE31	-	TRUE	FALSE	TRUE	FALSE	-1.10092	-0.796666	-0.655317	-0.673142	0.0157974	-1.64515	-0.166827	-1.24846	-3.54908	0.141076	-1.33748	-1.12926	-1.18997	-3.29918	-0.0904842	-3.38203	0.713368	-0.532689	-1.2941	-1.92656	-1.22113	-0.928459	-4.79839	-2.34245	-2.60159	-2.08738	-0.451697	-0.514921	-1.64515	-2.43496	-2.76401	-0.797066	-0.519298	-1.01303	-0.966703	-2.44094	-1.174	-2.87005	-1.0437	-1.38642	-1.41616	-1.14123	-1.74938
RVBD_1585c	Rv1585c	mod08	F	F	F	F	0.600865	0.928519	0.493645	-0.37313	1.30624	-0.10536	-1.5612	1.64166	2.60059	1.50459	1.14135	1.35371	0.347185	-0.486451	0.369884	-0.492294	-8.20911	-2.16768	0.690881	0.765011	0.0299101	-0.0580598	-0.027611	1.16261	1.44825	-1.13496	0.965252	0.982735	-0.10536	0.941202	-0.272733	-0.75594	-0.323598	-7.19074	0.936242	0.595444	0.412272	0.495262	-0.467803	1.09658	1.17245	0.181898	0.378246
RVBD_2239c	Rv2239c	mod06	TRUE	FALSE	TRUE	FALSE	-3.03788	-1.36726	-4.00799	-1.85872	-1.6806	-1.39956	-3.01167	-1.74154	-2.84263	-6.93242	-1.05254	0.778043	-3.94322	-4.4101	-0.336468	-6.92236	-2.64684	-3.58018	-1.35277	-1.43345	-0.33825	0.325998	-0.418007	0.791073	-1.94383	-2.00395	-7.92798	-2.12767	-1.39956	-2.28516	-4.66152	-2.98519	0.420157	-6.91794	-7.91223	-2.90044	-3.22837	-3.6073	-2.02482	-2.43134	-2.69868	-2.30205	-3.74976
RVBD_3651	Rv3651	mod06	FALSE	FALSE	FALSE	FALSE	-0.76949	0.262563	-0.792189	0.839728	-0.895808	0.181075	-0.439026	0.222483	-0.156032	-0.689046	-0.923339	0.263229	-0.0223068	-0.0243247	-0.515658	-1.02494	-0.511799	-1.21406	0.515617	0.394524	0.386303	0.493538	0.680195	-0.21226	-0.0673979	-0.221928	0.0650246	0.609886	0.181075	0.586486	0.632365	0.447715	0.651722	0.596806	-0.00981467	-0.200442	-0.156638	0.0872036	-0.324756	0.295339	-0.404504	0.0433497	-1.08832
RVBD_1581Ac	-	-	FALSE	FALSE	FALSE	FALSE	-0.817299	-0.111971	-0.317471	-0.724498	-6.91983	-2.41543	0.15006	1.05331	1.04689	-6.94155	1.16437	1.15392	-4.48565	1.20693	-0.630038	-2.66061	-2.6527	-0.727444	-0.672746	0.548627	-0.675312	-1.94432	0.151021	1.20577	0.316873	1.59969	-0.311568	0.189852	-2.41543	1.27947	0.272109	-1.18917	-0.25147	0.0639219	-0.620084	1.09771	-3.6194	-0.119573	-2.26831	0.0762253	0.30605	-1.36935	-0.247404
RVBD_3164c	moxR3	-	FALSE	FALSE	FALSE	FALSE	0.219576	0.416532	-0.150292	-0.114978	-0.246871	0.64655	0.64909	0.188487	-0.604927	0.782455	0.895969	0.979928	-0.13278	0.217398	-1.43601	-0.681573	0.266754	-0.0431461	0.285353	-0.417547	-0.412545	0.0582415	0.270386	-0.904138	0.0709511	0.00809881	-0.10953	-0.41511	0.64655	-0.33209	0.0959693	-0.0921501	-0.236504	-0.627541	0.229704	0.564723	0.242709	-0.107199	-0.0259166	-0.23427	0.0981104	0.101435	-0.0304049
RVBD_3133c	devR	mod20	TRUE	FALSE	FALSE	FALSE	-0.96175	0.655388	-0.185597	-1.39028	-0.362519	0.666753	0.351911	-1.1125	-0.73288	-9.7954	0.66476	0.58488	0.0429959	0.0234181	0.116581	1.25108	-0.195761	-0.715478	0.717999	-0.636813	-0.0306652	0.303148	-0.317599	-0.37317	0.360524	0.0158732	0.44987	0.0403754	0.666753	-0.613388	-0.203474	-0.61017	0.299479	0.658648	-0.0465686	-0.114577	-1.36631	0.637659	0.152715	0.45724	0.169164	-0.111338	0.701652
RVBD_2476c	gdh	mod05	TRUE	TRUE	TRUE	TRUE	-1.11559	-1.41475	-0.447887	-0.646348	-1.03029	-0.890163	-1.02165	-0.538784	-1.06585	-1.65215	-0.326312	-0.342159	-0.287707	-0.677089	-0.326136	-0.144693	-0.668007	-0.306735	-0.616992	-0.791233	-0.851372	-1.00013	-1.68202	-1.40607	-0.307433	-0.981368	-0.803347	-0.903686	-0.890163	-0.427995	-0.611559	-0.917754	-1.15229	-0.776751	-1.01097	-1.41144	-1.17851	-0.86465	-0.190499	-0.326488	-1.02999	-0.970606	-1.28675
RVBD_3549c	Rv3549c	mod05	TRUE	FALSE	TRUE	FALSE	-1.69929	-1.30018	-0.533761	0.315333	0.499357	-1.41686	-0.338139	-1.87375	-0.757847	-0.393891	-1.01771	-0.697113	-1.88541	-1.20309	-0.653991	-0.715825	-3.14579	-0.844664	-1.23642	-1.63934	-1.03562	-1.45262	-0.809582	-0.673152	-0.769631	-0.5165	-0.608221	-1.06023	-1.41686	-0.829135	-1.81665	-2.11356	-0.591238	-1.85266	-0.954725	-0.778034	-0.51373	-0.877869	-2.23552	-2.26544	-1.57982	-1.20121	-2.01425
RVBD_3560c	fadE30	mod05	TRUE	TRUE	TRUE	TRUE	-1.9325	-2.2545	-1.47595	-0.276657	-0.656448	-2.17217	-0.189091	-2.73538	-0.814197	-1.1741	-0.816096	-0.0275733	-5.68008	-5.35541	-1.01805	-2.11837	-3.69758	-2.51458	-1.90961	-2.81178	-2.69475	-3.59551	-2.35751	-0.90565	-2.88108	-0.73357	-1.47781	-1.25975	-2.17217	-2.73177	-2.50548	0.339981	-1.42361	-1.52858	-3.65732	-1.7735	-2.28232	-2.80334	-3.88643	-4.0212	-3.58054	-2.29653	-2.53497
RVBD_1702Ac	-	-	FALSE	FALSE	FALSE	FALSE	0.34929	0.858535	0.0538798	-2.57877	1.75027	-1.78032	-1.36386	-7.89042	0.988017	-0.56764	1.40677	0.494616	0.745288	0.935518	0.16022	0.544322	-2.61598	-0.0666293	0.529804	1.36194	-0.241987	0.141474	-0.928364	2.50671	-0.911609	0.961197	-1.30327	-2.14056	-1.78032	-2.55151	0.117802	-0.214939	0.0497742	-0.271528	-0.563395	-1.27455	-3.18592	0.0760743	-0.488258	1.03226	-0.118231	-0.579487	-0.302338
RVBD_1182	papA3	-	FALSE	FALSE	FALSE	FALSE	0.0990239	-0.000140969	0.137238	0.20536	-0.279857	-0.00719516	-0.329757	-0.275811	-0.206156	0.382496	-0.366253	-0.227756	-0.0858584	-0.0445954	0.150658	-0.30183	0.168804	-0.075472	-0.0576516	-0.0719815	0.0173911	-0.0226572	-0.263922	-0.133494	0.0724682	-0.0196794	0.159756	0.0921791	-0.00719516	0.365774	-0.0978473	0.0927026	0.193066	0.174343	0.492761	-0.0273723	0.300507	0.243399	0.176137	-0.0205037	0.0513347	-0.0422886	0.0534809
RVBD_3347c	PPE55	-	FALSE	FALSE	FALSE	FALSE	0.0559778	0.225009	0.149231	0.143431	0.128824	0.08003	0.14708	0.0062032	-0.049453	-0.0471307	0.169843	0.209023	-0.0750037	0.0276257	0.0649544	-0.209669	0.0908587	0.0860096	0.149567	-0.00647863	0.133118	0.155288	0.146114	0.205595	0.128955	0.173201	0.17041	0.145239	0.08003	0.234809	0.0762518	0.217742	0.0754948	-0.0219008	0.133175	0.169077	0.00757359	0.148786	0.153557	0.0715301	0.091512	0.0570535	0.106815
RVBD_2582	ppiB	-	FALSE	FALSE	FALSE	FALSE	0.884085	-3.60469	-3.00507	-3.03523	-2.01541	0.302991	0.383411	-3.03335	-2.99438	-2.02263	3.78545	4.46258	-3.06293	-3.01196	-3.03271	-2.02788	-3.01531	-3.0228	0.276462	-3.01861	-2.99799	-3.0324	-3.06993	-3.00069	-3.01136	-3.04658	-2.97848	-3.03884	0.302991	1.37669	-3.0156	-1.99783	-3.01938	-1.99843	-3.0368	-3.03259	-3.03362	-3.01934	-2.99189	-3.00789	-2.99283	-0.63629	-3.00226
RVBD_3831	Rv3831	-	FALSE	FALSE	FALSE	FALSE	0.188575	0.049778	0.18118	0.597354	0.0246319	-0.072068	0.367312	0.335267	0.607127	0.182586	0.377917	0.370391	0.18725	-0.0210923	-0.516437	-0.456513	0.0494274	0.238552	-0.231591	0.278002	0.0809003	0.0794887	0.166412	0.177838	0.212656	0.282262	0.263294	-0.0146025	-0.072068	-0.101677	0.000884856	0.191227	0.212469	-0.261237	0.36096	0.347288	0.330306	0.20762	-0.208875	0.131476	-0.0304944	0.070612	0.0812331
RVBD_1120c	Rv1120c	-	F	F	F	F	-0.0243705	-1.85454	-1.39971	-1.61467	-0.241509	-0.0712307	-0.898031	-9.46414	-1.30107	-8.46154	-1.7481	-0.108853	0.492768	-2.01864	-4.3752	-4.18193	-0.00347231	-0.0072048	-0.74881	-1.22625	-0.516574	-1.73656	0.246886	0.249074	-0.259666	-0.648963	-1.56434	-1.90515	-0.0712307	-2.36978	-0.371467	-0.143777	0.0844966	-1.93554	0.513454	-0.394231	-2.33178	-0.608504	-0.453769	-0.735951	-0.160964	-1.36247	-0.495631
RVBD_1736c	narX	-	FALSE	FALSE	FALSE	FALSE	-0.185498	-0.313104	-0.22721	0.00405774	0.0161538	-0.318471	-0.325263	-0.194804	0.141581	0.248345	-0.311344	-0.483101	-0.385041	0.114775	-0.171074	-0.0144054	0.00625038	-0.240796	0.0582059	-0.322364	-0.20323	-0.15984	-0.193027	-0.147999	-0.157449	-0.454667	-0.2615	-0.263184	-0.318471	-0.156683	-0.109545	-0.161625	-0.165173	0.0555027	-0.103055	-0.366337	-0.468303	-0.0322141	-0.302492	-0.174534	-0.196123	-0.178767	-0.218687
RVBD_2934	ppsD	mod08	TRUE	FALSE	FALSE	FALSE	1.66561	0.863619	0.779613	0.801409	1.00373	1.27698	1.16245	0.594411	1.32003	1.24776	0.310098	0.604428	-1.4313	-2.36923	-0.408332	-1.27262	-0.53942	-0.246566	0.487653	1.2295	0.726064	0.682313	0.164479	1.24266	1.59435	1.27372	1.61455	1.26319	1.27698	0.492302	0.727936	1.3176	1.00215	0.0400241	1.94675	0.551486	0.867263	1.59781	1.56623	1.511	0.954234	0.785764	0.865575
RVBD_0158	Rv0158	mod18	TRUE	FALSE	TRUE	FALSE	-0.539715	-0.516899	-0.197126	-0.436773	-0.480117	-0.0408954	-0.366677	-0.67637	-0.15327	0.431941	-0.315984	-0.286751	-0.278122	-0.471997	-0.172854	0.0770441	-0.357366	0.105717	-0.803322	-0.712935	-0.517662	-0.81772	-0.390719	-0.00662628	-0.464206	-0.609863	-0.338033	-0.266492	-0.0408954	-0.715252	-0.314427	-0.630127	-0.651736	-0.0649626	-0.766659	0.101111	-0.0204905	-0.274432	0.020118	-0.367137	-0.0561713	-0.793414	-0.420109
RVBD_2651c	Rv2651c	-	F	F	F	F	0.28759	0.325572	0.150572	-1.01867	0.869574	0.309279	-0.48579	1.02399	-0.0484234	-0.251759	-0.870321	-1.14229	-0.192735	-0.239597	-1.04285	-3.31384	0.0666393	-1.12813	0.459029	0.238867	-0.0160077	-0.0110133	-0.871502	-0.179951	0.0952308	0.724958	-0.0869449	-0.342777	0.309279	-0.422734	-0.387317	-0.0749884	0.111796	-1.28148	-0.473633	-0.110191	-0.0679645	0.26206	0.183284	-0.0336896	0.0671944	0.0601317	0.287941
RVBD_3060c	Rv3060c	-	F	F	F	F	-0.351052	-0.165187	-0.146769	-0.532817	-0.3495	-0.194775	-0.113478	-0.920004	-0.271075	-0.35421	-0.424084	-0.517257	-0.39328	-0.170756	-0.704485	-0.583069	-0.0297148	-0.521078	-0.0841391	-0.536458	-0.151175	-0.362517	-0.369083	5.13718e-05	-0.0815557	-0.494898	-0.143219	0.0700281	-0.194775	-0.61378	-0.22919	-0.0426468	-0.0525065	-1.16904	-0.141556	-0.173701	-0.655658	-0.341434	-0.200333	-0.289835	-0.184725	-0.346991	-0.152319
RVBD_3081	Rv3081	mod07	TRUE	FALSE	FALSE	FALSE	-0.648232	-0.352449	-0.178657	-0.879745	-0.111799	-0.261377	-0.522838	-0.768156	-1.08974	0.304311	-0.564924	-0.444357	0.0354816	0.20866	-0.2652	-0.83883	0.213816	0.512834	-0.536058	-0.499381	-0.114806	-0.32254	-0.810513	-0.426266	-0.426893	-0.0953228	-0.166977	-0.657996	-0.261377	-0.425734	-0.257507	-0.156891	-0.1981	0.286743	-0.831219	-0.299652	-2.34443	-0.380297	-0.181791	-0.418084	-0.208465	-0.664604	0.0851409
RVBD_2736c	recX	mod05	F	F	F	F	-0.334184	-0.701454	-0.127045	-0.481967	0.235611	-0.861608	-0.265915	-0.727682	-0.998045	-7.87598	-1.36933	-0.42168	-0.705551	0.116999	-1.55498	-0.255831	1.93402	-0.61048	0.150909	0.159583	1.134	-0.0495609	-1.52518	-0.786677	-0.0658422	-0.855554	-0.82636	-0.201639	-0.861608	-0.796462	-0.863557	-0.434586	-0.4199	0.590077	-0.0227158	1.22509	1.58254	-1.00253	0.076403	-1.1917	-0.461809	-1.61892	-0.954357
RVBD_2737c	recA	mod20	FALSE	FALSE	FALSE	FALSE	0.302274	0.760729	-0.127012	0.517666	0.0287322	-0.287914	0.134221	-0.743579	0.333975	-1.94549	0.654696	0.977547	-0.0203351	-0.578195	0.0274402	0.191105	0.916894	0.775473	-0.77204	0.136684	-0.168644	-0.326466	0.782949	0.0789204	-0.123664	0.497589	0.18685	0.288142	-0.287914	-0.499784	-0.291832	0.348819	0.44024	-0.136162	0.144793	0.800399	0.880184	0.144982	-0.187465	0.389528	-0.00860732	0.0729043	0.15764
RVBD_3874	esxB	-	TRUE	TRUE	TRUE	TRUE	-5.46019	-2.37441	-5.18633	-10.3496	-9.33081	-4.12388	-2.75726	-3.48939	-2.36962	-1.45374	-1.30536	-1.00256	-6.3627	-2.55174	-4.40742	-5.06778	-3.41867	-2.70482	-3.32084	-10.339	-4.15557	-4.45335	-7.00616	-10.3284	-4.3846	-10.3362	-4.83075	-5.35984	-4.12388	-3.73166	-4.12232	-5.39866	-2.57283	-1.21651	-10.3364	-3.44672	-1.41525	-3.54394	-4.55244	-7.08405	-4.69705	-1.95058	-3.82741
RVBD_3230c	Rv3230c	-	FALSE	FALSE	FALSE	FALSE	-0.662786	-0.180256	-0.430568	-0.114132	0.137144	-0.460385	-0.538784	0.118579	0.0706871	-0.0981454	-0.515917	-0.272785	0.165623	-0.580567	0.213218	-0.241778	-0.905785	-0.0391038	-0.472921	0.156549	-0.0845285	0.267469	-0.273826	-0.428938	-0.409168	-0.144276	-0.132219	0.0145295	-0.460385	0.251458	-0.208509	-0.312201	0.107397	-0.493424	-0.566902	0.0962002	0.143539	0.0566798	-0.200447	-0.319734	-0.60688	-0.219007	-0.485139
RVBD_0457c	Rv0457c	-	F	F	F	F	-0.420825	-0.342761	-0.0920268	-0.22731	-0.0796678	-0.14161	-0.584549	-0.339432	-0.412539	-1.06874	-0.381234	-0.176498	-0.147784	0.109681	-0.373461	-0.485607	-0.554767	-0.290182	-0.505107	-0.291321	-0.147963	-0.220948	-0.00478739	0.0793393	-0.0822083	-0.488209	-0.170878	-0.408839	-0.14161	0.0408362	-0.245739	0.131165	-0.217096	-0.450657	-0.2814	-0.288066	0.0265436	-0.133354	-0.0846687	-0.175681	-0.262236	-0.243972	-0.217221
RVBD_3910	Rv3910	-	TRUE	TRUE	TRUE	TRUE	-1.61128	-1.66315	-1.3285	-0.744156	-0.521184	-1.94052	-0.651151	-0.999185	-1.23246	-1.76269	-0.645637	-0.599363	-1.69895	-1.58441	-0.945217	-2.13416	-1.01523	-1.6206	-1.31563	-0.771283	-0.91848	-1.70407	-1.41771	-1.35232	-1.48843	-0.916499	-1.80807	-1.31004	-1.94052	-2.26963	-1.59448	-1.16855	-1.48157	-0.721789	-1.28729	-1.61343	-1.69765	-2.58995	-2.04621	-1.96963	-1.78562	-1.64021	-1.78239
RVBD_0661c	vapC7	mod12	TRUE	FALSE	FALSE	FALSE	0.6303	0.0758588	-0.191534	-2.45191	-0.267198	-0.163872	0.150071	-1.68202	0.881961	0.0628198	0.641688	0.254735	-0.446175	0.0832694	0.710832	-1.31721	0.21048	0.296783	0.0140364	0.50747	0.147441	0.204883	0.0773274	0.207892	-0.746061	-0.333992	0.00358077	-0.435873	-0.163872	0.217513	-0.325668	0.278792	-0.319392	-1.96217	-0.804984	-0.247195	-0.676853	-0.30375	0.352911	0.297043	0.165094	-0.076629	-0.321287
RVBD_2733c	Rv2733c	mod20	TRUE	TRUE	TRUE	TRUE	-1.86529	-1.36659	-1.02661	-1.60809	-0.490237	-2.00861	-0.979453	-1.23196	-1.31892	-2.59326	-0.527366	-0.310535	-1.73786	-0.41851	-0.509516	-1.98653	-1.5977	-0.0578774	-0.836396	-0.148907	-0.805135	-0.430814	-0.996812	-0.177056	-0.59638	-1.47154	-1.5892	-1.29019	-2.00861	-1.45391	-0.88204	-1.08274	-0.710598	-0.509792	-0.405913	-0.295204	-0.136453	-1.04977	-1.66008	-1.02166	-1.65513	-0.491236	-1.36289
RVBD_2855	mtr	mod06	TRUE	FALSE	FALSE	FALSE	-0.892715	-0.420955	-0.00629848	-0.798032	-1.43794	-0.29175	-0.103472	-0.290692	-0.137248	-3.46135	-0.77206	-0.645004	-0.0163076	0.0390821	-3.62835	-4.53994	-0.326554	0.363155	-1.18383	-0.285067	-0.837191	-0.768051	-1.25753	-0.553252	-0.734851	-0.903544	-0.56213	-0.140931	-0.29175	0.524804	0.293593	0.214495	0.101594	0.734363	-0.807019	-0.446766	-0.235164	-0.334804	0.254983	-0.0306386	-1.22922	-0.499712	-0.31042
RVBD_0495c	Rv0495c	mod03	FALSE	FALSE	FALSE	FALSE	-0.50238	-0.459702	-0.749763	-0.655716	0.620818	-0.0582269	-0.611468	-0.767353	-8.45363	1.51103	1.32854	0.877095	0.700852	-1.20156	-4.34456	-2.2228	0.331212	1.11574	-1.29311	0.0834076	0.186048	-0.10651	-0.236787	2.01341	-0.0925161	0.627504	-0.419457	-0.954926	-0.0582269	1.60458	0.293116	1.10503	0.563204	1.91664	-2.59509	-3.52553	-2.08205	-0.343002	-0.111261	0.657041	0.658756	0.213626	0.170795
RVBD_0304c	PPE5	-	FALSE	FALSE	FALSE	FALSE	0.00856197	0.201624	0.155591	0.23062	-0.0632533	0.191565	0.0269104	0.350796	-0.0851631	0.196265	0.19463	0.24248	0.108036	0.185359	0.0369746	-0.0318411	0.16727	0.112453	0.0278569	-0.0122808	0.075108	0.0957552	0.0701605	0.121941	0.12517	0.00468519	0.153544	-0.0212433	0.191565	0.209346	0.0701407	0.104762	0.147745	0.17921	0.242647	0.00469995	0.150643	0.186342	0.233558	0.173949	0.139732	0.162244	0.134545
RVBD_3916c	Rv3916c	-	FALSE	FALSE	FALSE	FALSE	-2.9019	-3.51767	-2.91416	-2.92395	-1.90941	-2.91588	4.12222	3.27263	-2.91581	-1.91345	1.91443	2.41083	1.07216	0.49948	2.15823	-1.91021	-2.91417	-2.92402	-2.91986	-2.90577	-2.91407	-2.91131	3.40449	-2.90497	-2.91194	-2.89726	1.33406	-2.9093	-2.91588	-1.90784	-2.92476	-1.91168	0.904621	-1.90135	-2.90538	-2.93186	-2.91773	-2.91129	-2.90855	1.82864	-2.90862	0.865268	-2.91641
RVBD_3077	Rv3077	-	FALSE	FALSE	FALSE	FALSE	0.139763	-0.25347	-0.0993327	-0.251759	-0.143377	-0.158544	-0.12485	-0.345777	-0.135852	-0.523304	-0.313049	-0.148553	-0.0414164	-0.142007	0.0342527	0.0542369	-0.28584	0.0641012	-0.20585	-0.143088	-0.157045	-0.22986	-0.149269	-0.0641243	-0.0689867	-0.281999	-0.126148	-0.0806471	-0.158544	-0.281512	0.0599828	-0.00493933	-0.022521	-0.184866	-0.379421	-0.343959	-0.338561	-0.0745777	-0.100699	-0.146665	0.00452519	-0.221706	-0.171956
RVBD_3261	fbiA	mod06	FALSE	FALSE	FALSE	FALSE	0.328887	0.826118	0.957131	3.24882	4.12988	0.658569	-0.189745	3.9951	-3.61401	-2.61842	2.72253	2.23338	2.03249	2.49189	3.68244	-2.61099	2.80428	1.28927	2.88865	4.00942	4.61427	4.98196	0.761872	3.75623	3.85718	2.30434	0.211008	3.17805	0.658569	1.71088	3.64132	2.27395	4.12104	-2.60601	5.25356	-3.62256	1.6703	3.13622	1.19511	2.82589	2.30839	2.74363	2.51548
RVBD_1762c	Rv1762c	-	FALSE	FALSE	FALSE	FALSE	0.152979	0.0718052	0.108325	-0.207362	0.379275	-0.168031	0.231983	-0.90394	-0.032606	-0.433185	0.458854	0.380908	0.470187	-0.657519	-0.548284	-0.572501	0.329505	-0.355291	0.0046535	0.0314616	-0.109521	-0.50416	-0.576233	0.00713173	0.155256	-0.186	-0.176773	-0.264489	-0.168031	-0.450842	0.274999	-0.179207	-0.0319791	-0.364599	0.62534	0.0680542	-0.146567	-0.0195481	0.215299	-0.00719159	-0.004768	-0.10292	0.0170706
RVBD_1683	Rv1683	-	TRUE	FALSE	FALSE	FALSE	-1.31741	-0.222307	1.14575	0.399816	1.11351	-0.947286	0.0951721	-0.322954	2.02875	-2.23187	0.829522	0.447857	-1.09674	-2.49402	-1.96035	-3.31106	0.58361	0.493592	-1.11563	-0.670168	0.0154272	-0.489602	-1.56098	-1.31421	-0.569095	0.517302	-0.696417	-2.1256	-0.947286	-0.477785	-1.03878	-1.07044	-1.47005	-1.03397	-0.844962	-0.375873	-0.950061	-1.28777	-1.29625	-0.925201	0.225315	-0.993509	0.80009
RVBD_0470A	Rv0470A	-	FALSE	FALSE	FALSE	FALSE	-0.0490319	-0.433983	-0.332957	-0.0132724	0.166799	-0.131368	-0.204836	-0.121149	-0.123129	-0.131621	-0.404275	-0.3214	-0.340538	-0.000394677	-0.174882	0.306714	-0.1782	-0.306657	-0.451472	-0.0615529	0.0705646	-0.134696	-0.221048	0.371309	-0.21585	-0.418035	-0.227331	-0.254704	-0.131368	-0.247692	-0.18919	0.160069	-0.119318	0.0028347	-0.0983875	-0.0887671	-0.233553	0.0771314	-0.0929977	-0.2354	-0.185732	-0.27328	-0.144383
RVBD_3760	Rv3760	mod18	TRUE	FALSE	FALSE	FALSE	0.053581	-0.358709	-1.74113	0.263775	-7.86065	-1.0311	-2.01935	0.963541	-8.86935	0.943565	1.24672	1.27337	-1.18079	-2.75495	1.68161	1.80006	1.0248	-3.36324	0.522619	-1.50746	-1.62644	-2.61083	-2.8251	-0.0302125	-0.35263	-0.688462	0.152679	-0.231398	-1.0311	-2.4196	0.308555	-0.702135	0.0239574	1.58925	-1.07552	0.79668	-8.8847	-0.301808	-1.73802	-1.17435	0.264864	-0.466256	-0.774721
RVBD_0456A	mazF1	-	FALSE	FALSE	FALSE	FALSE	0.0723218	-0.44136	0.0401411	0.0108944	-0.551756	-0.480184	0.152758	0.227352	0.788523	0.102199	-0.706597	-0.626212	0.0856243	-0.0464676	-0.193572	-0.942709	-0.34761	0.218848	-0.164415	-0.452416	-0.0381207	-0.379598	-0.326667	0.286241	0.323989	-0.170405	-0.160762	0.199832	-0.480184	-0.745388	0.144937	-0.114318	0.0497809	-1.41313	0.436228	-0.160287	-0.123097	-0.0981626	-0.100742	0.0239871	0.167924	0.00274646	-0.0718498
RVBD_1574	Rv1574	mod06	TRUE	FALSE	FALSE	FALSE	1.02849	0.446637	0.856026	-1.14152	-7.20091	0.817939	-0.243384	-0.196582	-0.242708	-7.21895	1.19984	0.554375	-3.54536	-3.75747	0.548946	-0.998545	2.02371	-0.0501327	0.478348	-0.469571	0.40336	-0.348408	-3.84838	1.72879	-0.801281	0.916842	0.255783	0.325577	0.817939	-0.418546	-0.598937	2.05956	0.683594	-7.20101	-0.132655	-0.886305	-0.027018	-0.562599	0.157446	0.176897	0.117402	-0.0643621	0.587498
RVBD_0554	bpoC	mod08	F	F	F	F	1.12755	0.73666	0.779789	0.865795	1.10729	0.903708	0.560286	1.05135	1.3	0.981633	0.47088	0.393443	-0.822746	-1.92095	0.25816	0.565788	0.16028	-0.0759259	0.822381	1.00843	0.807782	0.892174	0.509648	1.27849	1.2863	0.820789	0.883797	1.05043	0.903708	0.31465	0.989423	1.00755	1.00302	0.100574	1.53071	1.25538	0.876728	0.905799	1.13189	1.09832	0.761475	0.555265	0.617591
RVBD_0329c	Rv0329c	-	FALSE	FALSE	FALSE	FALSE	0.167786	0.108728	-0.251715	-0.26383	0.701083	0.539766	0.379973	-0.447871	0.566273	0.363689	0.824342	0.355075	0.11025	0.105807	0.189905	-0.638723	0.47841	-0.0936834	0.283529	0.312948	0.0713535	0.138326	0.416224	0.549238	0.11422	-0.188161	0.174286	0.110178	0.539766	0.0592465	0.32671	0.337592	0.207826	-0.66366	0.355764	-0.308492	-0.21042	0.0725379	0.43641	0.240581	0.450209	0.587113	-0.06113
RVBD_0456Bc	-	-	FALSE	FALSE	FALSE	FALSE	-0.0822502	-0.410081	0.0427972	-0.117658	-0.326181	0.303085	0.10197	-0.876543	-0.392193	-0.144649	0.406726	0.46069	-0.44278	0.109925	-0.0697987	0.302685	-0.935356	-0.536232	-0.51004	-0.245132	-0.0853549	0.0673962	-0.0618403	-0.111239	0.0204549	-0.111192	0.270545	0.00735471	0.303085	-0.0576764	0.0292556	0.184934	-0.0975123	-0.723753	0.0475293	0.152318	-0.376773	-0.0871759	0.00772946	0.0206331	0.207553	-0.206398	0.0962434
RVBD_0698	Rv0698	-	F	F	F	F	-0.586194	0.00927318	0.691846	-0.610946	-0.269546	-0.43246	0.171082	-0.524658	-0.464008	1.7759	0.986696	1.63843	1.0832	0.392113	-2.34371	-7.48524	0.305771	-1.2774	-0.093695	0.699619	0.375738	-0.173627	2.00457	0.424835	0.471503	-0.502466	0.351431	0.280153	-0.43246	0.476693	-0.358385	-1.12209	-0.18389	-7.47577	0.383411	1.35377	0.236252	-0.131907	-0.0224172	0.45169	-1.31471	-0.0548994	0.757581
RVBD_0815c	cysA2	-	TRUE	FALSE	FALSE	FALSE	-0.270293	-0.455389	-0.479767	-0.535214	-0.511211	-0.164583	-0.252052	-0.0385886	-0.659389	-0.483133	-0.315895	-0.320555	-0.434556	-0.488225	-0.584807	-0.327939	-0.388721	-0.355952	-0.362539	-0.898019	-0.295424	-0.418648	-0.712254	-0.43104	-0.0761712	-0.226284	-0.317668	0.0384523	-0.164583	-0.112448	-0.439579	-0.578748	-0.237827	-0.0723614	-0.148084	-0.0992969	0.119978	-0.484197	-0.27281	-0.452276	-0.435321	-0.34945	-0.535915
RVBD_1069c	Rv1069c	-	TRUE	FALSE	FALSE	FALSE	-0.704309	-0.38226	-0.70126	-0.664689	-0.454503	-0.259269	-0.75189	-0.731336	-0.469465	-0.139687	-0.307809	-0.250992	-0.279091	-0.431557	-0.407439	-0.306459	-0.521951	-0.576172	-0.436236	-0.603762	-0.395696	-0.0751248	-0.36821	-0.546908	-0.50644	-0.0175146	-0.27142	-0.366358	-0.259269	-0.0392791	-0.176354	-0.13774	-0.122131	-0.0441942	-0.429224	-0.17835	-0.205767	-0.0938595	-0.433356	-0.284401	-0.289986	-0.421346	-0.610739
RVBD_3059	cyp136	-	FALSE	FALSE	FALSE	FALSE	-0.283868	-0.0281092	-0.197268	-0.184072	-0.0066664	-0.085167	-0.270786	-0.164734	-0.0740839	-0.375303	-0.279389	-0.123263	-0.246747	0.0413062	-0.212979	-0.195832	-0.377224	-0.481059	-0.128276	-0.29548	-0.130781	-0.0262268	-0.123173	-0.0334927	-0.1153	-0.00814816	0.0180881	0.0164219	-0.085167	-0.0392622	-0.0732185	0.0133398	-0.0106607	0.0733255	0.111111	0.0193705	0.168945	-0.0114979	-0.12405	-0.075301	-0.0886882	-0.186272	-0.154756
RVBD_0778	cyp126	-	F	F	F	F	0.1091	0.122566	-0.0386641	0.202908	-0.38509	0.355549	0.38514	0.230008	-0.067011	-0.168642	0.465446	0.685061	-0.208976	-0.172441	0.0420274	0.191871	-1.22229	0.2438	0.286121	0.123532	-0.0972155	-0.200808	-0.0181356	0.318398	-0.0754614	0.0421293	0.0271325	-0.47547	0.355549	0.168233	0.0607652	-0.496055	0.0290933	-0.0329447	-0.35472	0.108461	1.0282	0.137144	-0.0161849	0.267184	0.273852	0.150852	0.163108
RVBD_2342	Rv2342	-	F	F	F	F	0.0224119	-0.660966	0.492699	-2.14413	-6.94853	-0.888725	-2.83268	-1.10608	0.580574	-6.9635	1.23538	1.13463	-0.160518	0.526026	0.428564	2.59888	0.706557	1.69272	-0.793534	-0.242021	-0.510548	1.31449	-0.846148	-0.205001	1.13529	-0.977409	-1.19607	0.232961	-0.888725	0.735993	-0.857744	-0.354913	-0.0702458	1.10239	0.245856	0.814255	1.20802	0.869004	0.0583729	0.621039	1.15069	0.471654	-0.494865
RVBD_0766c	cyp123	-	F	F	F	F	0.642923	0.347617	0.350977	-0.410244	-0.671486	0.626999	-0.3206	-0.0264304	0.692798	-0.262181	0.49087	0.499624	0.097118	0.108425	0.795548	0.975171	0.751632	0.0182053	-0.0660028	0.447236	0.109183	-0.0560483	-0.17747	0.535231	0.224479	-0.168696	0.0510573	-0.149267	0.626999	0.516958	0.17028	0.428309	0.289465	-0.258563	-0.356621	0.430732	0.0467482	0.444773	0.294122	0.564066	0.0980894	0.642345	0.210547
RVBD_1084	Rv1084	-	TRUE	TRUE	FALSE	FALSE	-0.779732	-0.868177	-0.384479	-0.69201	-0.69075	-0.66025	-0.424773	-0.456485	-0.383462	-1.13975	-0.44806	-0.296135	-0.777456	-0.338743	-1.15848	-0.394748	0.269515	-0.315946	-0.506256	-0.502915	-0.307206	-0.387767	-0.512745	-0.624161	-0.334915	-0.336551	-0.346915	-0.0337654	-0.66025	-0.821738	-0.410772	-0.682984	-0.394822	-0.745494	-0.349516	-0.67608	-0.721401	-0.370062	-0.354196	-0.226219	-0.400385	-0.331791	-0.37181
RVBD_2985	mutT1	mod06	TRUE	FALSE	FALSE	FALSE	-1.1707	-0.337663	-0.0326889	0.646346	-0.0433394	0.485933	0.267698	0.344024	-0.800897	0.916752	0.595943	0.569491	-1.53602	-0.275157	-1.64893	0.829591	0.283855	0.574465	-0.542504	-1.48436	-0.257478	-0.203205	0.404162	-0.337314	-0.0357687	-0.249859	0.407139	0.486038	0.485933	0.368059	-0.8304	0.00830764	0.117391	0.20484	-0.659543	-0.390206	-2.96933	0.0818811	-0.0653998	0.0226014	0.256179	0.232784	-0.11006
RVBD_1433	Rv1433	mod17	TRUE	TRUE	FALSE	FALSE	-1.12514	-0.84292	0.106751	-0.361664	-0.446215	-0.0331905	0.495378	-0.295211	-0.237258	-1.22082	-0.413996	-0.252502	-0.00192936	0.219033	0.164813	0.0290645	-0.417848	-0.112976	0.204449	-0.724586	-0.483587	-0.220806	-0.406735	0.226059	-0.183842	0.236181	0.110335	0.405199	-0.0331905	-0.244524	0.178696	0.106717	0.0221601	0.478224	0.124099	-0.237419	-0.482706	-0.124481	0.00289643	0.273692	0.0867306	0.0681792	-0.334144
RVBD_0197	Rv0197	-	F	F	F	F	-0.150229	-0.407161	-0.172209	-0.586619	0.365928	0.23446	0.0552081	-0.022089	-0.287358	0.368674	0.441073	0.391386	0.289343	0.328657	0.132593	-0.188885	-0.119229	-0.789431	0.131313	-0.163765	0.168058	-0.402548	-0.250172	-0.281255	-0.137458	0.150702	-0.177376	-0.160143	0.23446	0.308461	0.0461293	0.257718	0.0289803	0.0106193	-0.232533	0.464566	-1.14615	-0.322402	0.12258	-0.0184144	-0.0283113	-0.283437	0.166564
RVBD_0571c	Rv0571c	-	F	F	F	F	-0.722289	-0.249027	-0.483399	0.039511	-0.240221	-0.141799	-0.735068	-0.937147	-0.26674	0.273719	-0.675337	-0.506456	-0.212291	-0.0811598	-0.15087	-0.211746	-0.18786	-0.0714068	-0.110544	0.0361228	-0.392862	-0.125523	-0.3224	-1.28192	-0.298406	-0.69219	-0.338929	-0.158778	-0.141799	-0.205361	-0.404756	-0.404095	-0.320535	-0.0620848	0.205226	-0.388584	-1.95819	-0.00157856	-0.347194	-0.672227	-0.147283	-0.244565	-0.248753
RVBD_0612	Rv0612	-	FALSE	FALSE	FALSE	FALSE	0.440298	0.0255995	-0.203358	-1.04429	-0.320409	-0.122389	-0.124074	0.0743398	-1.37795	-0.73706	0.568953	-0.148164	-0.672313	-0.105052	-0.516363	-0.149042	0.0916612	0.0152066	0.0360341	0.0609981	0.0198258	0.717256	-0.178344	0.415823	-1.65057	0.514997	-0.262526	-0.257159	-0.122389	0.446977	-0.195694	-0.11469	0.165102	-0.585161	-1.16839	-1.55596	-0.707689	0.217059	0.0491795	0.14456	0.198814	0.197739	-0.121494
RVBD_1560	vapB11	-	FALSE	FALSE	FALSE	FALSE	1.84425	0.0793218	2.05777	1.7971	-4.12144	-0.884165	3.27187	-5.13356	-5.13217	-4.12827	2.72642	2.0483	4.01191	-5.13731	-5.14502	-4.12534	0.803086	-0.164391	0.260761	1.56522	0.971373	1.30552	1.55559	-5.11809	-5.12508	-5.11251	-5.13081	1.44605	-0.884165	-4.12316	1.79419	1.61132	0.723966	-4.11381	-5.11789	-5.14374	2.58551	-5.12234	1.70789	0.518744	1.35732	-0.00112326	0.694982
RVBD_3287c	rsbW	-	FALSE	FALSE	FALSE	FALSE	1.04151	0.1457	0.678141	-2.20831	-2.62483	-0.675573	0.808935	1.32882	-0.466109	0.474413	1.08684	0.534498	1.57312	1.63774	-0.353437	-0.445483	-2.77501	0.610668	-1.48582	-0.127454	0.291158	0.187378	1.13708	-0.122712	0.0717649	1.23499	0.522108	0.521593	-0.675573	1.15792	0.559041	1.35837	0.705986	-0.0567012	-0.266306	-0.333407	0.0490937	0.717523	1.08524	0.356084	0.594715	0.370191	0.294029
RVBD_1729c	Rv1729c	mod17	TRUE	FALSE	TRUE	FALSE	-0.530991	0.954669	0.191451	-0.507388	-0.820248	-0.0362607	0.669312	1.5389	0.134987	-0.282897	0.684116	0.290312	1.07143	0.990422	0.115529	0.401611	-1.20345	0.116812	-0.365172	-0.242093	0.471482	0.479804	-0.688668	0.70694	0.10192	1.2421	-0.634774	-0.0591935	-0.0362607	-2.34772	-0.522245	-0.770596	-0.0269484	0.315954	-0.515898	0.739189	0.601277	0.765379	1.04515	0.170016	0.277112	0.515393	-0.106356
RVBD_1768	PE_PGRS31	-	FALSE	FALSE	FALSE	FALSE	-0.108285	-0.0601568	-0.0189134	-0.339065	-0.195857	-0.0257109	-0.181691	-0.343013	0.0232814	0.433101	0.327827	0.208947	-0.187359	-0.0252866	-0.0223952	0.102785	0.228441	0.0473792	0.225197	0.180592	-0.075896	0.0906338	0.0149399	0.158192	-0.188006	-0.239094	0.0273662	0.264539	-0.0257109	0.100671	0.0537797	-0.244951	-0.120049	0.549414	-0.236673	-0.329208	-0.136609	-0.0359124	0.182913	0.0304551	0.220751	0.00991388	-0.155368
RVBD_1941	Rv1941	-	TRUE	FALSE	FALSE	FALSE	0.0260395	-0.164566	-0.340143	-0.48616	0.219916	-0.645145	0.229673	-1.02045	-0.494881	-0.473447	-1.0495	-1.6594	0.1425	-0.31653	0.0799808	-0.694727	-2.68607	-0.00705274	-0.199697	-0.0683025	-0.087883	-0.476994	-0.00323688	-0.0036092	0.232772	0.361567	-0.190019	-0.859482	-0.645145	-0.171913	-0.493978	-1.33453	-1.18457	0.931467	-1.33293	-0.0153564	-4.07158	-0.458423	-0.813383	0.0217452	-0.309038	0.211195	0.00991818
RVBD_0829	Rv0829	-	F	F	F	F	0.339442	0.0357564	-0.131781	-0.371277	-0.260823	-0.0500513	0.0251077	-0.292224	0.544416	-1.88987	-0.259885	-0.162768	-0.167311	0.440827	0.195144	0.560185	-0.376227	-0.113845	0.00925296	0.285868	0.123083	0.121836	-0.0159855	-0.166723	0.0488102	0.213305	-0.265956	-0.270189	-0.0500513	0.515837	-0.0636008	0.113604	-0.0983775	0.108131	0.211422	0.0154524	0.832242	-0.113406	-0.121232	0.0496532	0.0531048	-0.00199506	-0.197263
RVBD_0355c	PPE8	-	FALSE	FALSE	FALSE	FALSE	0.0639764	0.159165	0.152715	0.0125576	0.0485632	0.144366	0.173251	0.0725437	-0.0083073	-0.197081	0.122423	0.237667	0.00909353	0.0139666	-0.00311668	0.0101468	-0.0245857	-0.0667803	0.0604042	0.00106174	0.0346304	0.000318183	0.130608	0.111528	0.103336	0.125543	0.131869	0.0915812	0.144366	0.0440036	0.0413266	0.144021	0.086863	0.0483952	-0.055493	0.0613961	0.0820862	0.0910175	0.0577494	0.0935726	0.115871	0.116138	0.0760722
RVBD_2306B	Rv2306B	-	FALSE	FALSE	FALSE	FALSE	-0.368823	-0.383111	0.0119511	0.392121	0.128573	-0.0706331	-0.97652	-2.23588	0.683329	1.19538	-1.49771	-1.14233	-0.151442	-0.347392	0.680689	1.29587	-0.704149	0.00258477	-0.106693	-0.49679	-0.208189	-0.49797	0.942761	0.417877	-0.178236	-0.832605	-0.292945	-0.199579	-0.0706331	-0.0750889	-0.315293	-1.18544	-1.17163	1.04147	0.330226	-1.31622	-0.8787	-0.1669	-0.309308	-0.0736234	-1.15586	-1.10635	-0.402408
RVBD_1698	mctB	mod12	TRUE	TRUE	FALSE	FALSE	-1.23122	-4.04992	-1.86789	-1.49021	-2.24143	-0.657984	-1.19953	-2.30665	-8.48105	-0.230163	0.994863	1.53912	-0.0287111	-8.49553	-0.475794	-7.48773	-0.91695	-3.37057	-0.389778	-1.51908	-2.00141	-1.07324	0.823945	-2.30907	-1.30365	-8.47863	-0.191863	-1.59308	-0.657984	-2.8479	-0.531856	-1.21029	-0.902567	-7.47504	-8.47866	-3.46509	0.844579	-1.27566	-2.38902	0.00963825	-0.651903	-1.60906	-1.42305
RVBD_0204c	Rv0204c	mod06	TRUE	TRUE	TRUE	TRUE	-0.90229	-1.6858	-1.23926	-2.6692	-1.02666	-1.9794	-1.11362	-0.521585	-0.740897	-3.66	-0.569698	-0.587644	-1.5008	-2.90618	-2.04638	-9.97158	-2.9898	-2.60614	-2.38751	-3.34382	-1.48948	-2.19352	-2.76458	-0.742318	-2.69182	-1.50517	-0.831877	-1.00436	-1.9794	-2.1564	-1.21087	-1.73215	-1.60211	-1.98179	-2.26651	-3.27254	-0.845354	-0.912313	-1.13206	-1.01431	-0.883888	-2.01533	-1.59811
RVBD_1962Ac	-	mod05	TRUE	FALSE	FALSE	FALSE	-0.326345	0.670306	-0.59714	0.488029	0.00104301	-0.394783	-1.37488	0.0898584	-8.88515	-7.9021	1.09733	0.956304	-1.59181	-0.748326	0.675535	1.191	1.10741	0.547978	-0.00670909	-1.52631	0.126409	-1.27245	0.685913	0.0484529	-0.623425	-0.490592	-0.271698	-0.00299758	-0.394783	-0.461347	0.437337	0.228044	0.135935	-0.433358	0.829609	-0.641398	-8.9053	0.379402	-0.391672	-0.0423182	-0.390588	0.506354	-0.749406
RVBD_1291c	Rv1291c	-	FALSE	FALSE	FALSE	FALSE	-0.349356	-0.194076	-0.189346	1.00213	0.22482	-0.24431	-0.290847	-1.16409	0.152154	-1.00882	-0.898527	-0.394294	-0.686155	-0.139351	0.211465	0.269404	-0.339541	-0.200475	-0.201603	0.350057	0.0450744	-0.480893	0.150065	-0.00471652	0.353289	-0.184039	0.00075701	-0.0752235	-0.24431	-0.179439	-0.0254775	-0.0504595	-0.193513	0.486958	-0.419566	0.165609	-0.852781	0.149226	-0.00751138	-0.235408	-0.0810518	-0.224853	-0.0809891
RVBD_1414	Rv1414	-	FALSE	FALSE	FALSE	FALSE	0.730495	0.560869	0.398287	2.03855	-1.18702	-1.0144	1.49964	0.203596	-0.167325	-7.32096	1.21942	1.23366	1.8474	0.507467	0.257221	-7.3151	-0.156457	-0.188769	0.0384569	0.61129	0.689582	-0.724491	-1.99297	0.286772	0.221664	-0.462156	1.08973	0.535143	-1.0144	0.587499	0.268373	1.09603	0.481085	-1.68933	-1.64311	-1.09184	-0.743061	0.358187	-0.51684	-0.536766	0.565416	1.14405	0.667298
RVBD_2714	Rv2714	-	TRUE	TRUE	FALSE	FALSE	-0.880671	-0.973151	-0.430906	-0.681761	-1.83356	-0.923451	-1.09379	0.0385529	-1.11706	-0.701278	-0.504488	-0.754617	-0.330445	-1.20123	-0.657914	-0.291343	-0.477238	-0.0376924	-1.13991	-1.19631	-0.917236	-1.03149	-1.05541	-1.38886	-0.678228	-0.637716	-1.05192	-0.636957	-0.923451	-1.23781	-0.983159	-0.729185	-1.09698	-0.783805	-0.780397	-0.621716	-0.00461852	-0.697501	-0.685965	-0.348534	-0.671522	-0.972451	-0.926343
RVBD_1156A	-	-	F	F	F	F	-0.00341923	-0.357038	-0.0269706	-0.983783	-0.126664	0.0327411	-0.869062	-1.227	0.198057	-0.706293	-0.590791	-0.535198	0.0133468	0.478357	-1.48977	-0.677029	-0.863965	-0.530189	-0.350339	-0.103433	-0.879546	-0.214303	0.159492	-0.331319	-0.712948	-0.211557	0.0912067	-0.211734	0.0327411	-1.19557	-0.166232	-0.533498	-0.223699	-0.189101	0.37371	0.13805	0.92204	-0.00658498	0.0363788	-0.00628233	-0.114944	0.0887831	-0.440176
RVBD_3650	PE33	-	FALSE	FALSE	FALSE	FALSE	3.84471	0.604286	-5.02904	-5.0406	-4.01893	0.764249	1.90503	-5.03878	4.26247	2.28906	2.2194	0.597912	-2.45643	-0.365736	-5.04357	-4.03162	-1.03244	2.56936	-5.03306	-5.02954	-1.79567	-5.03478	-0.579494	-5.01496	2.67466	-5.02847	-1.70586	0.305431	0.764249	-0.630067	-5.03022	-4.02209	-1.20708	-4.00828	2.56435	-0.700238	-5.03541	-0.406084	1.97302	-1.76729	0.368823	0.10294	0.410186
RVBD_1075c	Rv1075c	-	FALSE	FALSE	FALSE	FALSE	-0.15027	-0.206878	-0.218505	-0.0238965	0.293541	-0.08971	-0.33267	-0.523566	-0.0112219	0.128411	-0.356427	-0.282433	0.0570098	-0.13024	0.126651	0.167991	0.374522	-0.0488219	0.0904035	-0.0700792	-0.106777	0.195805	-0.161955	0.245504	-0.286321	-0.320154	-0.202117	0.0409238	-0.08971	-0.00253995	-0.134043	-0.0561332	-0.198102	-0.00542946	0.0209709	-0.512612	-0.331766	-0.087987	-0.04632	0.0168077	-0.150571	-0.0832333	-0.0740937
RVBD_3664c	dppC	mod04	F	F	F	F	-0.754684	0.039006	-0.521841	-0.380222	-0.220064	-0.0735104	-0.626446	0.81817	-0.896553	-0.180417	-0.891547	-0.438838	0.321687	-0.302217	-1.35583	-0.830975	-0.99929	-0.266654	-0.235686	-0.703924	-0.0591715	-0.174678	-0.86031	-1.9175	-1.48259	-0.877289	0.561873	-0.894788	-0.0735104	-0.696625	0.164325	0.635593	0.373973	0.252463	-2.68392	-0.00894038	-1.26924	0.0618404	0.0252609	0.220458	0.303825	-0.0853406	0.225528
RVBD_0596c	vapB4	-	FALSE	FALSE	FALSE	FALSE	-3.55165	-4.17849	-3.56062	-3.58347	-2.56762	-3.57121	3.74709	-3.56722	4.28983	-2.56691	3.6465	2.99624	-0.995064	-3.58513	-3.58461	-2.55987	-3.56643	-3.56961	-3.57321	-3.55253	-3.56501	0.281432	-3.57479	-3.56138	-3.5745	-3.54292	3.59638	2.60055	-3.57121	-2.56253	0.278687	-2.56497	0.249497	-2.56533	-3.55956	-3.58334	0.754337	0.348743	-3.56291	-3.56437	-3.55843	1.89113	-3.56145
RVBD_2380c	mbtE	mod04	TRUE	FALSE	FALSE	FALSE	-0.57118	0.160559	-0.350462	-1.48655	-1.69964	0.045105	-1.37563	0.159031	-1.49778	-3.46573	-0.561381	-0.342128	-4.07704	-4.66126	-10.781	-5.49494	-10.7844	-4.8917	-0.947489	0.526027	0.463408	1.905	-0.539742	-1.91818	-0.28338	-0.256189	-0.253218	-0.673523	0.045105	-2.11098	-0.577161	-0.918661	-0.302606	-2.22262	-0.00513483	-1.2382	-3.35823	0.680765	1.36473	1.27192	1.12931	-0.191627	0.403847
RVBD_0517	Rv0517	-	FALSE	FALSE	FALSE	FALSE	-0.414654	-0.121718	-0.189491	-0.113779	0.0364087	-0.320863	-0.145595	0.0840085	-0.00984379	-0.544698	-0.274192	-0.234218	-0.23622	-0.151718	-0.147757	-0.516192	-0.124243	-0.475739	-0.112213	-0.174769	-0.204825	-0.236546	-0.0301276	-0.0858599	-0.189942	-0.152518	-0.299113	-0.201715	-0.320863	-0.420328	-0.110889	-0.00198684	-0.108873	0.0950104	-0.189634	-0.201374	-0.357155	-0.357199	-0.20615	-0.183391	-0.277939	-0.276482	-0.2417
RVBD_1448c	tal	mod08	F	F	F	F	-1.47682	-0.260313	-1.02714	1.08639	-1.00073	-0.203029	-0.992366	-0.639328	-0.319225	0.6093	-1.0945	-1.07041	-1.0724	-3.86031	-1.98523	0.770213	-0.0600428	-0.455955	-0.579029	-0.628468	-0.875071	-0.976193	-0.308807	-0.960024	-0.960167	0.125957	-0.297263	-0.334345	-0.203029	-0.03807	-0.502533	-0.85871	-0.222065	-1.94912	-1.43689	-0.421197	-0.568409	0.0931212	-1.01639	-0.199362	-0.863523	-1.04768	-0.81638
RVBD_3218	Rv3218	mod06	TRUE	FALSE	FALSE	FALSE	0.237191	-0.72566	0.396182	-1.52545	0.0487353	-0.214993	0.778245	-1.2161	0.836947	-0.118911	0.439058	0.344722	-0.045396	-0.592683	-0.645174	0.327439	-0.378375	0.645933	-0.311574	0.313052	-0.148957	-0.429215	-0.269509	-0.210623	-0.00176312	0.670364	0.232872	-0.573448	-0.214993	-0.0797099	-0.160182	0.0951075	-0.379847	0.526863	-0.612641	-0.752514	-1.0072	-0.251655	0.243737	0.0794027	0.346109	-0.131513	0.0789706
RVBD_0081	Rv0081	-	TRUE	FALSE	TRUE	FALSE	-0.294628	0.122711	-0.213544	-1.56474	-0.9507	-0.345894	-0.408716	-0.629908	0.126779	0.296843	-0.327092	-0.591075	-0.553971	-0.267572	-0.436582	-0.257517	-0.213957	0.40087	-0.56963	-0.609297	0.0567367	-0.36309	-0.0972689	-0.0817339	-0.355073	-0.162651	-0.0722825	-0.491189	-0.345894	-1.0953	-0.36763	-0.670066	0.0401618	-3.58855	0.0621135	-0.442701	-0.0995532	-0.207004	-0.598748	-0.294558	-0.367681	-0.226093	-0.126545
RVBD_0362	mgtE	-	FALSE	FALSE	FALSE	FALSE	-0.298655	-0.171228	-0.106987	0.111676	-0.667872	0.0487668	-0.368171	-0.531372	-0.0109115	0.0528225	-0.417251	-0.266577	-0.722736	-0.577026	-0.600291	-0.0796375	-0.255155	-0.307732	-0.276491	-0.180453	-0.475234	-0.288978	-0.482634	-0.0741238	-0.403718	-0.0844728	-0.204536	-0.223336	0.0487668	-0.270836	-0.12641	-0.426683	-0.25636	-0.0108847	-0.158503	-0.304303	0.146389	-0.239543	-0.110315	-0.0128106	0.0173206	-0.188136	-0.334813
RVBD_2923c	Rv2923c	-	F	F	F	F	-0.0255235	-0.575597	-0.976686	-0.0491405	-0.443937	-0.210195	-0.444446	0.150642	-0.98464	-9.52739	0.728606	0.0651938	-0.0713819	-0.466018	-0.164537	-0.659896	0.0314385	-0.795624	-0.0979038	-0.0835171	-0.71403	-0.32991	-1.54091	-0.135407	-1.14479	-0.344587	-1.07368	0.101938	-0.210195	-0.45504	0.00718194	-0.00128675	-0.583589	-0.237756	-0.00971929	-0.00733864	-0.102228	-0.523272	-0.188531	-0.0198612	-0.232676	-0.955889	-0.844366
RVBD_3678c	Rv3678c	-	TRUE	FALSE	FALSE	FALSE	-1.4042	-0.251868	-0.123173	0.753104	-0.0388028	-0.770993	-0.309233	-0.930537	-0.616778	-0.0434505	-0.823063	-0.903461	-2.39478	-2.14349	-0.816678	-1.15473	-0.780033	-0.520295	-0.198353	-1.66397	-0.97113	-1.04737	-0.795047	-1.73481	-0.84258	-0.773973	-0.925404	-0.365512	-0.770993	-0.88075	-0.288063	0.953015	-0.333472	0.266357	-1.17953	0.0564	-0.529901	-0.602378	-0.736671	-1.35223	-1.48181	-0.988662	-0.721663
RVBD_1917c	PPE34	-	FALSE	FALSE	FALSE	FALSE	0.16347	0.179806	0.192489	0.280078	0.186628	0.253383	0.161514	-0.105117	0.118699	-0.160626	0.247976	0.185584	0.105298	0.236355	0.326113	0.0783501	0.205619	0.10694	0.204658	0.139497	0.102621	0.146694	0.133562	0.221953	0.285109	0.117336	0.158108	0.19122	0.253383	0.0252456	0.153445	0.31192	0.118454	0.569394	0.303726	0.298054	0.167975	0.245919	0.245745	0.202871	0.154821	0.185367	0.251334
RVBD_2276	cyp121	-	FALSE	FALSE	FALSE	FALSE	-0.132702	0.130479	-0.141616	-0.392476	0.585482	0.314228	0.457122	0.431934	-0.19486	-0.0197822	0.72637	0.431495	0.395714	-0.681061	0.378494	0.969236	0.713166	-0.307828	0.355592	-0.399781	0.153164	0.388218	1.07613	0.151583	0.585568	0.405707	-0.0857673	-0.518007	0.314228	-0.0018212	-0.123827	-0.251162	-0.186577	-0.673635	-0.830108	-0.19993	-1.54535	0.635618	0.183878	0.302391	-0.260592	0.0825131	-0.181935
RVBD_2666	Rv2666	-	FALSE	FALSE	FALSE	FALSE	0.416448	0.446909	0.733941	-0.262636	0.937389	0.569242	0.525788	0.704741	0.511789	0.232222	0.425244	0.414959	0.188686	0.57112	0.294747	0.628985	0.676597	0.155557	0.435194	0.515199	0.543784	0.326288	0.0460464	0.504548	0.49062	0.634795	0.51398	0.790338	0.569242	0.456373	0.68995	0.635881	0.613047	0.391846	0.28637	0.455873	0.556733	0.175205	0.769821	0.288682	0.575739	0.346293	0.319292
RVBD_2766c	Rv2766c	-	FALSE	FALSE	FALSE	FALSE	-0.208025	-0.243202	-0.175624	-0.00486179	-0.00840922	-0.209771	-0.329146	-0.52366	-0.144601	0.339772	-0.448078	-0.121468	-0.401404	-0.525041	-0.948834	-0.13813	-0.11158	-0.179173	0.0193553	-0.00504236	0.0232258	-0.0751808	-0.0846242	-0.211113	-0.0358513	-0.0660261	-0.0613151	-0.192701	-0.209771	0.166373	-0.0125805	0.102626	-0.120514	0.165313	0.0892293	0.0663139	-0.571975	-0.0202738	-0.158861	-0.121793	0.0348138	0.112437	-0.133436
RVBD_3422c	Rv3422c	-	FALSE	FALSE	FALSE	FALSE	-1.69247	3.4268	-1.70228	-1.71114	-0.683294	-1.69401	5.2655	-1.70579	-1.71153	-0.701551	3.66114	3.83457	-1.71535	-1.69619	-1.70776	-0.700891	2.29108	-1.70149	6.05023	-1.70419	-1.71398	-1.70764	-1.69162	-1.68602	-1.69117	4.68084	-1.70438	-1.6925	-1.69401	-0.700058	-1.68909	-0.696525	-1.69631	-0.679612	-1.68303	-1.69924	-1.70004	1.70138	-1.68404	5.85581	2.17591	2.78505	2.50761
RVBD_1196	PPE18	mod06	FALSE	FALSE	FALSE	FALSE	0.280311	0.314539	0.478158	0.98621	0.797478	0.333644	0.350208	0.316125	0.148774	0.763913	0.472096	0.428129	0.993327	0.816285	1.01335	-0.46208	-0.0363379	0.44832	0.76709	0.251157	0.739339	1.06185	0.568608	0.135441	0.588071	0.799662	0.475314	0.656659	0.333644	0.694616	0.777268	0.52858	0.92221	0.4398	-0.0368938	-0.103368	0.988685	0.681567	0.807964	0.693417	0.726609	1.02043	0.682048
RVBD_2190c	Rv2190c	mod08	TRUE	FALSE	TRUE	FALSE	-1.58598	-0.419941	-0.470671	-0.398393	-3.17549	-1.61997	1.08663	-0.691158	-0.410211	-8.43294	0.650861	0.786547	0.548437	0.698147	-0.128577	0.185915	0.499067	-0.453351	-1.67289	-1.51425	-0.944279	-0.921599	-2.93083	-2.2582	-1.01242	-0.342209	-1.67882	-1.53442	-1.61997	-2.24518	-1.44636	-1.51269	-0.584204	-0.39902	-9.42112	-1.1067	-4.73096	-1.01443	-1.41203	-0.573277	-0.852782	-0.051439	-0.427747
RVBD_0861c	ercc3	-	FALSE	FALSE	FALSE	FALSE	0.147214	0.299859	0.152635	-0.21204	-0.0885586	0.225586	-0.113144	0.278786	-0.627503	0.723484	0.459079	0.254147	0.670991	0.264885	0.395105	0.731296	0.882013	0.750874	0.203587	0.298676	0.27391	0.271622	-0.72054	-0.212566	-0.358652	0.549469	-0.167848	0.0159732	0.225586	0.0304377	-0.110465	0.0259163	0.372197	-0.0432529	-0.0777954	0.00235007	-0.278842	0.402286	-0.121587	0.00652383	0.239774	0.259312	-0.108652
RVBD_0913c	Rv0913c	-	FALSE	FALSE	FALSE	FALSE	-0.506707	0.161811	0.221462	0.415287	0.890109	-0.0768706	0.17206	0.0838353	-0.498939	-0.231118	0.544827	0.34151	-0.147266	-0.744265	-0.141628	-1.28982	0.402191	-0.0058306	0.0168713	0.0356116	0.0872405	0.0343903	-0.375941	-0.556428	-0.306987	0.203696	0.172714	0.156324	-0.0768706	0.0543824	0.194989	-0.0605745	-0.101168	-0.394288	0.347028	0.220133	-0.00357681	0.408244	0.043664	0.0429026	0.0855582	0.117312	0.352154
RVBD_1915	aceAa	-	FALSE	FALSE	FALSE	FALSE	-0.288444	-0.0685109	-0.142199	-0.751949	-0.0777236	-0.140049	-0.258197	-0.575412	-0.58405	-0.326084	-0.482594	-0.247867	-0.381421	0.036669	0.0414477	-0.203685	-0.597381	-0.240584	-0.263296	-0.325495	0.0870543	-0.0103613	0.236015	0.275465	-0.174319	-0.179968	-0.145551	0.0416592	-0.140049	0.175166	-0.0961277	0.0957875	-0.194841	-0.0602596	-0.59366	-0.0477646	0.159013	0.0598729	-0.092596	-0.180956	-0.0232536	0.064863	-0.22585
RVBD_1140	Rv1140	mod06	F	F	F	F	-0.393386	0.0551425	-0.410171	0.239536	-0.434747	-0.87289	-0.845509	0.439333	0.55687	-1.75241	-0.621102	0.0105763	-0.229545	0.721224	0.88558	-2.53058	0.244482	-0.656981	-0.0412214	-0.173075	0.222306	0.254898	0.158609	-0.424167	0.316102	-0.070954	-0.319308	-0.394326	-0.87289	-0.289536	-0.101707	0.225512	0.179292	-0.443479	-0.130431	-0.191182	-0.473529	-0.17382	-0.981765	-0.264136	-0.393401	-0.210054	-0.614099
RVBD_3273	Rv3273	mod13	TRUE	FALSE	FALSE	FALSE	-0.821032	-0.119383	-0.555298	-0.16053	-0.308086	-0.852424	-0.487403	-0.0664946	-0.516929	-2.00366	-0.347221	-0.443231	-0.275225	-0.0752649	-0.546401	-1.25307	-0.422414	-0.576236	-0.735783	-0.716407	-0.338199	-0.392804	-0.49707	-0.27341	-0.349115	-0.351659	-0.480393	-0.364568	-0.852424	-1.30522	-0.522982	-0.978994	-0.741637	0.216048	-0.429567	-0.373304	-0.386493	-0.649763	-1.13453	-0.516884	-0.548556	-0.665809	-0.639549
RVBD_2942	mmpL7	mod15	TRUE	TRUE	TRUE	TRUE	-1.46831	-1.64317	-1.8149	-1.3143	-1.65656	-1.54385	-0.990429	-1.59556	-1.17457	-0.633783	0.366848	0.619214	-0.389023	-1.64858	-1.20282	-0.933198	-1.87208	-1.00521	-2.23898	-1.5107	-1.31257	-1.53734	-1.88702	-2.01516	-0.756769	-1.83381	-1.29324	-1.47028	-1.54385	-2.08626	-1.73604	-1.79068	-1.59685	-1.3783	-1.10609	-1.86093	-1.00522	-1.26294	-0.87018	-1.11289	-1.59864	-1.02376	-1.45827
RVBD_3202c	Rv3202c	mod05	FALSE	FALSE	FALSE	FALSE	0.559557	0.156248	0.408948	-0.0663068	0.546067	0.107507	0.539016	-0.1567	0.343565	0.145725	0.396576	0.120563	0.287048	0.323012	-0.73721	-0.163074	-0.763769	0.368123	0.410161	0.573842	0.400618	0.501471	-0.0482964	0.106809	0.198142	0.46204	0.494348	0.632266	0.107507	0.549765	0.518578	0.535694	0.549845	1.00749	0.0912068	0.0591994	0.595529	0.192418	0.234184	0.260153	0.301282	0.273842	0.334466
RVBD_1700	Rv1700	mod10	TRUE	FALSE	FALSE	FALSE	-7.38059	-0.610901	-0.167402	0.952858	-6.37106	-7.38725	0.357521	-7.39252	-7.37477	-6.38831	1.14592	0.744405	-0.199981	-7.3909	1.21414	-6.38268	-7.38731	-7.39779	0.315443	-2.59459	-0.014691	-1.03193	0.927351	-0.215268	-1.50549	-2.44496	1.10589	-0.692682	-7.38725	-2.98223	-2.04979	0.742341	0.234179	-6.36804	-0.70942	-0.181794	-7.39115	-1.97632	-7.3807	-0.870846	-1.0961	-0.50924	0.355064
RVBD_1813c	Rv1813c	-	TRUE	FALSE	FALSE	FALSE	-0.266259	-0.265844	0.0616095	-0.694783	-1.14564	0.140111	-0.523146	-0.027256	-0.491109	-0.513885	-0.414741	-0.376408	0.561457	-0.867712	-0.325291	-0.760496	-0.288697	-0.912272	0.156787	-0.00421992	0.0310757	-0.505636	-0.345654	0.378833	0.147736	-0.192251	-0.253384	-0.526747	0.140111	-0.491313	-0.145599	0.037944	-0.274887	-1.51571	-0.0551379	-0.0448622	-0.642109	-0.705079	-0.556413	-0.29053	-0.11326	-0.153431	-0.156835
RVBD_1673c	Rv1673c	mod01	FALSE	FALSE	FALSE	FALSE	-0.0666361	0.22771	0.0949552	0.00394007	-0.307317	0.336951	0.356807	-0.944923	0.116241	-1.12844	0.511684	0.232064	0.249221	-0.489596	-0.457675	-0.377696	-0.0658735	-0.84292	0.71322	-0.212024	-0.271676	-0.142311	-0.326164	0.11145	0.0419012	0.193485	0.150438	-0.0309204	0.336951	0.553699	-0.0191266	-0.389753	-0.158766	0.39986	0.218256	0.364238	-0.379389	0.224438	0.126732	0.0909042	0.0861861	-0.164749	0.0137693
RVBD_1798	eccA5	mod06	TRUE	TRUE	TRUE	TRUE	-2.36779	-3.07276	-1.9579	-2.78051	-4.56407	-0.926711	-3.6827	-2.16102	-1.07633	-3.50018	0.531584	0.654692	-5.8836	-7.39711	-2.28903	-2.66669	-4.29973	-3.61591	-2.14028	-2.31067	-3.37558	-3.43225	-2.14915	-2.30107	-2.1957	-3.26164	-1.46805	-2.41528	-0.926711	-2.05538	-1.59402	-1.438	-1.40186	-2.68557	-1.96053	-2.55863	-2.29603	-1.5757	-2.65719	-1.76093	-2.20795	-2.62136	-2.15704
RVBD_1914c	Rv1914c	mod06	FALSE	FALSE	FALSE	FALSE	-0.897113	0.411617	0.554681	0.139377	-0.644841	0.0560385	0.46519	-0.414515	0.194852	-0.849551	0.680811	0.517327	0.354289	0.0746072	-0.895766	-2.13315	0.448172	0.484148	-0.419575	0.219526	-0.803656	-0.657098	-0.0644246	-1.10167	0.809991	-0.277166	0.253819	0.129124	0.0560385	0.100375	-0.249299	0.334509	0.399692	-0.323031	-0.0547656	-0.329984	-0.654491	0.232532	0.435493	-0.135007	0.0125558	-0.248705	0.283227
RVBD_0012	Rv0012	mod13	TRUE	FALSE	TRUE	FALSE	-1.24262	-0.231896	-1.15184	-0.515083	-1.1792	-1.57859	-1.73321	-0.383923	-1.16669	-0.972941	-0.533876	-0.913083	-1.06214	-0.726033	0.0486954	-2.0124	-0.449625	-0.735089	-0.920009	-0.424179	-0.664041	-0.84365	-0.865902	-1.05463	-0.0606809	-0.152135	-0.586017	-0.871742	-1.57859	-1.62111	-1.03744	-1.27779	-0.851657	-0.289828	-0.70848	-0.632527	-0.578133	-1.10055	-2.30656	-1.10744	-2.10146	-1.2562	-1.2465
RVBD_2037c	Rv2037c	mod20	TRUE	FALSE	FALSE	FALSE	0.0807922	-0.367682	0.045476	-0.896731	-1.5995	-0.0471746	-0.0155853	-1.04627	-1.5536	-0.546161	-0.470838	0.154757	-0.0776532	-0.458623	-0.32728	-0.362364	-0.898857	-0.643761	0.276236	0.112148	-0.23126	0.0441174	-0.489433	-1.33373	-0.23155	-0.346091	0.274443	-0.327867	-0.0471746	-1.24776	0.49675	0.773242	0.061342	-0.416541	-0.689452	0.0848256	-0.713012	0.00851379	0.143047	0.167273	0.0437458	0.171174	-0.145915
RVBD_3267	Rv3267	mod20	TRUE	FALSE	TRUE	FALSE	-2.74807	-1.45101	-2.21302	-5.02236	-7.59275	-1.0915	-0.522002	-8.61633	-3.51016	-7.61616	-1.17316	-1.11934	-0.530074	-8.61463	-0.432124	-2.37354	-8.61254	-0.815016	-1.92323	-3.24936	-1.92757	-3.09579	-3.6543	-8.59381	-2.73201	-1.53829	-0.655282	-2.0839	-1.0915	-7.60464	-1.66652	-2.96315	-0.811234	-7.59697	-8.59944	-5.0819	-8.61647	-2.06288	-1.95663	-0.471934	-2.23143	-0.759007	-1.12843
RVBD_0696	Rv0696	-	TRUE	FALSE	FALSE	FALSE	-0.107385	-0.943835	-0.619593	-0.877359	-1.11242	-0.809531	-0.145034	-0.363134	-0.643615	0.411848	-0.800188	-0.482305	0.0548842	-1.78956	-1.75361	-3.01023	-0.976944	-0.453257	-0.768215	-0.738311	-0.573722	-0.600348	-0.964149	-1.18848	0.221428	-0.421885	-0.694405	-0.835761	-0.809531	-1.00156	-0.636578	0.166962	-0.354064	-2.97772	-0.219145	-0.870478	-1.29547	-0.35035	-0.320935	-0.473243	-0.831668	-0.11211	-0.454485
RVBD_1495	mazF4	-	FALSE	FALSE	FALSE	FALSE	-0.432067	-0.742908	-0.0744503	-1.37165	0.368497	-0.124044	-0.753184	0.449973	1.04	0.214759	-0.826231	-0.254477	0.230162	0.22707	-0.26808	0.533827	-0.778452	-0.197708	0.237149	0.12413	0.138231	0.299485	0.360777	0.405793	0.280756	0.702293	-0.410588	-0.336119	-0.124044	-0.0979557	-0.683347	-0.286522	-0.489867	1.26443	-0.511461	0.0411166	-0.00928156	0.154622	-0.210308	-0.43357	-0.270923	-0.125297	-0.243543
RVBD_1533	Rv1533	-	FALSE	FALSE	FALSE	FALSE	0.583058	0.243312	-0.223992	0.85445	-0.0351589	-0.273217	0.454069	0.668792	-0.252107	-0.937272	0.668057	0.478154	0.125435	0.825319	0.525484	0.650426	0.409244	-0.694353	0.0956905	-0.491291	0.0342047	0.0221585	0.0191829	0.415752	0.152576	-0.104752	0.314629	0.22084	-0.273217	0.281091	0.0331359	0.701188	0.292828	0.690538	0.394279	0.313091	0.390666	0.0372903	-0.467352	0.371543	0.146059	0.406058	0.0843051
RVBD_1667c	Rv1667c	-	FALSE	FALSE	FALSE	FALSE	0.116451	-0.410863	0.114856	-0.198033	-0.463061	-0.136215	0.131104	0.472502	0.37484	0.205478	0.49838	0.420131	0.162004	-0.0237549	0.23004	-0.227129	0.573386	0.183688	0.117495	-0.0662568	-0.138906	-0.0587423	0.318759	0.557342	-0.0105062	0.00949504	0.0740758	0.555878	-0.136215	-0.311783	-0.118026	0.0838981	0.0952149	-0.769843	-0.790313	-0.306809	-1.06407	0.0267414	0.255486	0.0932114	-0.0947248	-0.0792266	-0.0387038
RVBD_1750c	fadD1	-	FALSE	FALSE	FALSE	FALSE	-0.131003	-0.0131738	0.149186	-0.337716	-0.051554	-0.103593	0.102306	0.107164	-0.064865	0.223423	0.343187	0.296012	0.0407184	0.17179	0.285419	0.550786	0.49954	0.0951	0.22004	-0.358137	0.122348	0.0624782	0.300899	0.164787	0.235454	0.0884441	0.110849	0.0628684	-0.103593	0.162938	0.148418	0.184407	0.178729	-0.885058	0.364339	-0.113069	-0.502569	0.129365	0.0794486	-0.165346	-0.0697717	0.149232	0.0636774
RVBD_1820	ilvG	-	TRUE	TRUE	FALSE	FALSE	-0.397326	-0.788081	-0.45228	-0.225991	-0.0211568	-0.214417	-0.482909	0.052468	-0.272524	-0.283257	-0.332828	-0.0418769	-0.619507	-0.688444	-0.100881	-0.313376	-1.03383	-0.643917	-0.397742	-0.387399	-0.358666	-0.515884	-0.175942	-0.228779	-0.634981	-0.336117	-0.2907	-0.272695	-0.214417	-0.0282201	-0.266419	-0.393839	-0.212857	-0.5637	-0.157471	-0.550732	-0.0666758	-0.267714	-0.316626	-0.344682	-0.257222	-0.24652	-0.51403
RVBD_2771Ac	-	-	F	F	F	F	-0.246934	-0.978128	0.507159	0.890363	-0.258597	0.123879	1.59657	1.8807	-8.46298	-7.47833	1.09448	0.285174	0.0300449	1.0324	-0.168442	-3.1982	0.0207928	0.621155	-1.06205	-0.160643	-0.344133	0.233615	0.670062	0.665503	0.170646	0.583786	-0.376195	0.40805	0.123879	-2.17421	-0.124569	0.838283	-0.154912	1.6023	1.42756	0.0591494	0.811519	0.152691	-0.181465	0.577663	-0.0817747	0.0637581	-0.0649351
RVBD_3226c	Rv3226c	-	FALSE	FALSE	FALSE	FALSE	0.037973	-0.18801	0.0685801	0.0651255	-0.664286	0.0366445	-0.368332	-0.375503	-0.0781488	-0.137138	-0.267277	-0.179802	0.068027	-0.198111	-0.343953	-0.481998	0.453906	0.29512	0.0356572	0.124708	-0.137497	-0.0371607	-0.56166	0.375322	0.0246876	0.121307	0.121466	-0.197949	0.0366445	0.445711	0.126791	-0.256984	-0.0613659	-0.601465	-0.425985	-0.366671	-0.373189	-0.0790646	0.0877519	0.0689558	0.041298	-0.160771	0.0604353
RVBD_3278c	Rv3278c	-	FALSE	FALSE	FALSE	FALSE	0.576755	0.583592	0.394288	0.186978	-0.844528	0.790057	0.593988	0.79478	-0.702138	1.13065	0.661414	0.474363	0.440973	0.471843	0.333661	-0.0860098	0.425922	1.5275	1.13726	0.537761	0.440391	0.593341	0.299264	0.625236	1.01301	0.983725	0.920066	0.973631	0.790057	1.34503	0.88372	0.78134	0.721929	2.00475	-0.225721	0.996026	0.267894	0.91091	0.958742	1.28955	1.63219	1.41143	0.79671
RVBD_0412c	Rv0412c	-	FALSE	FALSE	FALSE	FALSE	-4.08747	-4.67731	-4.0764	-4.06392	3.03667	-4.08754	-4.07845	1.37398	-4.05224	-3.08888	2.07777	0.576366	-0.671276	0.2605	-4.07741	-3.06665	-4.08647	-4.07828	-4.09758	0.71408	-4.09118	-4.08238	-4.09038	-4.05842	-0.170114	-4.04779	0.465847	-4.07682	-4.08754	-3.06099	-1.66913	-3.05196	-0.80849	-3.07219	-4.0503	-4.07934	-4.08653	-4.06698	0.165766	-4.08399	-4.06623	0.0700629	-4.09165
RVBD_1502	Rv1502	-	FALSE	FALSE	FALSE	FALSE	0.716258	0.220919	0.669039	-0.697542	0.493449	-0.259554	0.838664	0.0557231	-1.09654	-0.61812	0.713344	0.21563	-0.66029	0.0295229	-0.735363	-0.621935	0.235063	-0.42019	-0.0892309	0.245165	-0.160943	0.184331	0.888951	0.441707	0.274364	0.85428	0.474954	-0.299597	-0.259554	0.600992	-0.210745	-0.17302	-0.0608705	-0.350604	0.748872	-0.699337	-0.760841	-0.128912	0.277301	0.116838	0.246221	0.466919	0.227802
RVBD_3073c	Rv3073c	-	F	F	F	F	-0.911322	-0.266095	-0.666441	0.0824797	-0.769503	-0.259321	-0.88684	-1.70343	-1.62397	-0.858179	-0.6435	-0.393457	-1.04878	-0.279863	0.386022	-0.228004	-0.625259	-0.206561	-0.132641	-0.589312	-0.327903	0.106141	-0.941846	-0.164635	-0.157799	-0.0328809	-0.414698	-0.238697	-0.259321	-1.5658	0.174691	-0.417644	-0.493909	-1.02752	-0.668966	-0.407012	-1.23959	-0.430972	-0.44083	-0.624733	-0.426741	-0.518916	-0.274731
RVBD_3420c	rimI	-	F	F	F	F	-0.358722	-0.499408	-0.79354	-0.161664	-1.00063	-1.36378	-1.26185	-0.769305	-1.21775	0.0774325	-0.880601	-0.763506	-2.20645	-0.420501	-2.06245	-2.16643	-0.326394	-0.531839	-1.11468	-1.00071	-0.809814	-0.681402	-0.62582	-0.529461	-0.937862	-1.38092	-0.894447	-1.31118	-1.36378	-1.61264	-0.691908	-1.8397	-0.895588	0.577164	-1.68745	-0.609818	-1.53786	-0.856879	-0.542167	-0.548554	-0.494172	-0.268491	-0.759113
RVBD_0875c	Rv0875c	-	FALSE	FALSE	FALSE	FALSE	-1.65115	0.947196	-1.06131	-4.42408	-1.75517	-0.428235	-3.34471	-8.01069	0.22861	0.255997	-2.55985	-2.98826	-1.37433	-4.58485	-8.01755	-2.72866	1.15397	-0.8519	-0.538141	-1.82993	-0.785381	-0.380268	-0.239175	-1.82445	-1.04966	0.273735	-0.0572411	-0.523783	-0.428235	-7.00123	-0.354728	-3.06157	-3.0236	1.93508	-0.409256	-2.11421	-3.68698	0.36236	0.157676	-0.671268	-0.305815	-0.565991	0.098284
RVBD_3389c	htdY	-	FALSE	FALSE	FALSE	FALSE	-0.0170227	-0.126233	-0.12509	-0.0397909	0.00491859	-0.112332	0.259376	0.127003	-0.0743266	0.443537	0.448083	0.309849	-0.313177	0.00744754	0.576551	-0.047143	0.0748955	-0.0296713	0.00453819	-0.173727	-0.0259643	-0.138782	-0.203552	-0.188069	0.0707469	0.390368	-0.193731	-0.0417187	-0.112332	-0.244849	0.084789	0.39993	-0.0580624	-0.213049	-0.296805	-0.212446	0.339457	-0.0989687	-0.0195466	0.118114	-0.029862	0.33071	-0.149862
RVBD_3483c	Rv3483c	-	FALSE	FALSE	FALSE	FALSE	-0.303199	-0.220054	-0.242545	-0.355444	-0.0339522	-0.430845	-0.380617	-0.20052	0.143755	0.266759	-0.423039	0.0138974	-0.566429	-0.188809	0.0196075	-0.835767	-0.365231	-0.376442	-0.226737	-0.345251	0.0265654	0.00040905	-0.0760995	0.269509	0.00813092	-0.200028	-0.0927944	0.0418411	-0.430845	-0.494713	-0.0358817	0.0571619	0.0195726	0.0128817	0.121368	-0.236035	-0.0852091	-0.194127	-0.296791	0.0547486	-0.00393534	0.200709	-0.0988883
RVBD_2705c	Rv2705c	-	FALSE	FALSE	FALSE	FALSE	-0.259381	-0.0709344	-0.0209564	0.153809	0.0964047	-0.00593663	-0.0473613	-0.115285	0.341593	-0.327533	0.294922	0.169907	-0.0365504	-0.375128	0.120853	-0.133664	-0.125057	-0.0614121	0.080105	0.000217252	0.0492474	-0.0435047	0.00234137	-0.0312323	0.0502487	0.125322	0.0178286	0.00976009	-0.00593663	-0.138619	-0.140259	-0.0743493	-0.113192	0.214982	0.14188	0.104862	0.209048	-0.0578419	-0.0020132	0.0301751	0.127055	0.139808	0.0860077
RVBD_3112	moaD1	-	FALSE	FALSE	FALSE	FALSE	2.45405	1.06702	0.83087	-3.7482	-2.7265	3.17051	-0.311798	-3.74264	-3.74379	-2.73762	2.22324	5.32876	4.20853	-3.74159	-3.75085	-2.73547	-3.74177	-3.74357	-0.402889	0.108495	0.975361	-3.73937	-3.73845	-3.7253	-3.73174	3.72722	2.51074	0.274587	3.17051	0.663268	0.491255	3.12623	1.24921	-2.72015	-3.72408	-3.74693	4.74421	-0.344905	2.16714	-3.73408	1.58424	0.990892	-3.73979
RVBD_0040c	mtc28	mod18	TRUE	FALSE	FALSE	FALSE	-0.920816	-0.5199	-1.10096	-2.06304	-1.31787	-0.459332	-0.167666	-0.0666842	-1.52697	-3.08786	0.623188	0.802959	-1.85807	-1.49211	-1.4099	-4.16572	-4.0195	-1.79924	-0.967114	-0.434594	-0.905636	-1.14807	-0.323659	-2.63014	-1.25192	-0.0787107	-1.11338	-1.24037	-0.459332	-1.779	-0.232737	-0.613136	-0.25942	-0.995681	-0.383244	-0.616919	-0.550548	-0.41872	-1.59395	-0.920773	-1.50378	-0.532039	-0.832063
RVBD_1185c	fadD21	-	FALSE	FALSE	FALSE	FALSE	0.0336862	0.139274	0.202297	0.114545	-0.0156574	0.0747025	0.185608	0.0381028	0.163723	-0.237938	-0.321909	-0.16531	-0.16464	0.00676542	0.106519	0.413877	0.335348	0.0923743	0.243854	0.0949698	0.0649851	-0.0677426	-0.131218	0.264008	0.224099	0.204333	0.290842	0.265921	0.0747025	0.277887	0.0633383	0.18853	0.219264	0.371436	0.158591	0.0114859	0.285422	0.304738	0.287854	0.0973685	0.208521	0.178971	0.0863479
RVBD_3243c	Rv3243c	-	FALSE	FALSE	FALSE	FALSE	0.138694	0.309623	-0.254311	-2.02356	-0.138396	-0.179738	0.0968132	1.06999	0.651183	-1.58587	-1.17401	-0.934188	1.02362	-0.58332	-0.00596195	1.22024	-0.333657	-0.0562168	-0.542461	-1.15516	-0.239803	0.443098	0.721617	0.19565	0.117594	-1.91744	-0.0197021	0.141752	-0.179738	-1.62682	-0.225465	-0.31663	0.0831197	1.087	0.737659	-0.54695	-1.4959	-0.503791	-0.366297	0.0915074	-0.617979	0.325976	-0.940139
RVBD_0984	moaB2	-	FALSE	FALSE	FALSE	FALSE	-0.746798	-0.128515	-0.826892	-0.209076	-0.0284753	-0.404082	-0.746408	-0.0444548	-0.0856701	-0.538077	-0.953671	-0.432528	0.058651	-0.0329049	-0.0402106	-0.420248	0.245118	-0.871073	-0.170774	-0.339137	-0.139542	-0.0843989	-0.265973	0.374585	-0.243383	-0.433831	-0.495481	-0.601551	-0.404082	-0.560796	-0.352995	-0.31588	-0.35832	-1.27305	0.199594	-1.3402	-0.364218	-0.520187	-0.576187	-0.581449	-0.722201	-0.604584	-0.634886
RVBD_2570	Rv2570	-	FALSE	FALSE	FALSE	FALSE	0.36218	-0.367005	0.690618	0.624279	-1.97945	-0.0298408	-0.431032	-1.54951	-1.42022	-1.78453	0.972029	0.10582	0.195909	0.273756	-2.72449	-8.09919	1.16548	1.23127	0.572122	-0.912793	-0.185787	0.283784	-1.76642	0.0760295	0.684925	-0.149148	0.361713	-0.584918	-0.0298408	0.774546	0.332789	-0.10565	-0.00400199	-8.08648	-1.16256	-0.553291	-0.727076	-0.0422916	0.822933	0.585868	0.160619	-0.349712	0.660594
RVBD_3010c	pfkA	-	TRUE	FALSE	FALSE	FALSE	-0.737687	-0.558146	-0.231877	0.577856	-0.0523001	-0.802837	-0.126331	-0.221898	-1.75707	-0.42698	0.555675	0.0882395	-0.991431	-0.380109	-0.274316	0.116796	-1.92994	-0.466165	-0.300999	-0.671427	-0.421124	0.021351	-0.226802	-0.259599	0.263862	-0.245962	-0.123615	-0.0210605	-0.802837	0.665268	0.261865	0.136177	-0.102598	0.766282	0.485633	-0.438427	-0.417791	-0.194701	-0.3445	0.256156	-0.473518	-0.561168	-0.833197
RVBD_3620c	esxW	-	F	F	F	F	0.247622	0.0731159	0.358347	-0.0368217	0.389908	0.513531	0.538249	-0.122848	-0.302227	-1.11469	0.373972	0.339804	0.398323	-0.125034	-0.823222	-0.110232	0.388811	0.255863	0.120259	0.216544	0.0265221	0.276772	-0.449739	0.446195	0.274814	0.107835	-0.155329	-0.0802954	0.513531	0.409966	0.313259	0.139839	0.337361	0.590539	0.0540439	-0.361958	0.292599	0.0628252	0.239014	0.0876553	0.0104485	-0.0441304	0.424195
RVBD_1387	PPE20	mod18	FALSE	FALSE	FALSE	FALSE	-0.193261	0.355157	0.0961699	-0.0978576	-0.228088	0.533842	0.0403569	-0.0773284	0.454384	0.953448	0.301911	0.214597	-0.198771	0.0202003	-0.455922	0.85132	0.179767	0.0352695	-0.00963685	-0.360585	-0.0832592	-0.0129276	-0.245859	0.558824	0.298844	-0.0497719	0.144527	0.101327	0.533842	0.22296	0.0396195	0.29258	-0.0613862	0.339375	0.511813	0.812563	0.541022	0.582312	0.607452	0.217529	0.455365	0.209731	0.238467
RVBD_0245	Rv0245	-	FALSE	FALSE	FALSE	FALSE	2.59646	-1.43223	0.151512	2.56835	-3.70892	0.83126	2.82661	-4.72237	-4.71784	-3.71593	1.37914	2.58446	1.41817	-0.0609961	1.45199	1.5187	2.2783	2.33062	1.93139	2.81464	2.74648	3.31666	-4.72433	4.64938	2.78433	0.226316	1.04763	1.67415	0.83126	1.39475	2.25044	0.918013	2.05907	2.80652	-4.70605	3.37721	0.974418	-0.796991	-4.70906	-4.71086	-0.816588	1.47525	0.0337421
RVBD_0865	mog	-	FALSE	FALSE	FALSE	FALSE	-1.0921	-0.0836397	-0.421767	-1.01798	0.136674	-0.544259	-0.471042	0.0562105	-0.451087	-0.0790805	-0.723614	-0.157703	0.0234674	0.0253691	-0.195628	-0.159448	0.138773	0.166604	-0.195828	-0.614367	-0.386877	-0.377219	-0.25164	-0.372657	-0.361803	-0.589979	-0.492337	-0.562256	-0.544259	-0.528057	-0.49834	-0.561153	-0.327876	-0.0192336	-0.175863	-1.3177	-0.638992	-0.177621	-0.321428	-0.35245	-0.497117	-0.542511	-0.584809
RVBD_2815c	Rv2815c	-	FALSE	FALSE	FALSE	FALSE	0.427481	0.202459	0.688118	0.341806	0.51807	0.503028	0.604643	0.848173	-0.365736	0.092477	0.780405	0.576738	0.506706	0.299272	-0.107292	-0.0486025	0.288083	0.197006	0.838096	0.286273	0.265801	0.679609	0.183221	0.589095	0.658431	0.550915	0.482646	0.969759	0.503028	1.03022	0.783706	0.789544	0.58934	0.82892	0.539249	0.795106	0.536321	0.49043	0.686147	0.52586	0.671635	0.549237	0.444287
RVBD_1566c	Rv1566c	mod20	TRUE	FALSE	FALSE	FALSE	0.136488	-0.640916	-0.377681	-1.45633	-3.06949	-1.08554	-0.0359095	-0.388807	0.23209	-1.06387	-0.781626	-0.382021	-0.0278006	0.320545	-0.915346	-4.04475	-2.94023	-0.56898	-1.03483	0.473381	0.445676	0.115301	-0.652591	-2.04515	-0.0766765	-0.688062	-0.407792	-0.69225	-1.08554	-3.43041	-2.10503	-1.29367	-0.75399	-2.69737	-0.497393	-1.07545	-1.26428	-0.717294	-1.49741	-0.910173	-0.69974	-0.603286	-1.24801
RVBD_0238	Rv0238	-	FALSE	FALSE	FALSE	FALSE	0.00264155	-0.467783	-3.45258	-6.71594	-5.70888	-1.15318	0.603389	0.454212	1.15899	-5.72439	-2.71327	-0.731538	-6.73669	-6.72906	-6.72595	-5.71209	-2.1696	-6.72353	-6.72938	-1.35848	-1.14811	-1.7018	-2.26184	-6.70257	-0.91003	-6.69712	-6.71595	-3.42889	-1.15318	-0.603258	-1.52611	-1.77099	-1.11099	-5.70637	-6.69877	-6.72516	-6.72427	-3.32713	0.051487	-3.46329	-0.643869	-4.33937	-3.44978
RVBD_3528c	Rv3528c	mod20	F	F	F	F	0.0388195	1.06573	0.241351	-0.343209	0.197965	0.223732	0.613084	-0.998289	1.10946	-1.11998	0.729122	0.0617785	0.561071	0.507651	0.869437	-8.87742	0.854835	0.32374	0.816256	0.587795	0.829738	0.164343	-0.173363	0.333008	0.347397	-0.00601887	0.433204	0.121983	0.223732	0.895185	0.584439	0.0149568	0.866786	-3.25698	0.888538	0.606089	0.300926	0.277213	0.758795	0.815472	0.615221	1.20553	0.77806
RVBD_0266c	oplA	-	FALSE	FALSE	FALSE	FALSE	-0.0725203	-0.246721	-0.026075	-0.0674831	-0.261851	-0.0360228	-0.0977199	-0.0860894	0.057995	-0.30642	-0.24208	-0.355422	-0.317859	-0.138068	-0.0337932	-0.449535	0.0805123	-0.168099	-0.112317	-0.00323378	-0.100143	-0.00446149	-0.0532669	-0.0885098	-0.0394845	-0.0574761	0.0245267	-0.0279674	-0.0360228	-0.167485	-0.13293	-0.143015	-0.0609828	0.201249	0.121439	-0.253385	0.0774309	-0.0772054	-0.0773645	-0.100435	0.0239263	-0.0150324	-0.00904646
RVBD_0346c	ansP2	-	F	F	F	F	-0.157517	-0.251608	-0.0529476	-0.405771	-0.189794	0.0973682	-0.0970563	-0.163524	-0.0739327	-0.895561	-0.318257	-0.0675268	-0.41202	-0.737064	-0.325621	-0.037796	-0.257097	-0.588469	-0.182498	-0.325318	-0.232307	-0.395827	-0.298579	-0.355592	-0.189748	-0.141973	-0.220384	-0.33659	0.0973682	-0.0309238	-0.321143	-0.415399	-0.364299	-0.406972	-0.226544	-0.121385	-0.580501	0.00816068	0.149953	0.0941282	0.166109	-0.0779679	0.0106927
RVBD_1759c	wag22	-	F	F	F	F	0.126944	0.020929	-0.177633	-0.551012	0.108668	0.0370073	-0.264262	-0.324837	-0.551032	0.477749	0.461576	0.220925	-0.0837632	0.818083	-1.40525	0.17339	0.178015	0.177789	0.446691	-0.421501	-0.306957	-0.517364	0.132802	0.394336	-0.624327	0.0516329	0.369623	0.557252	0.0370073	0.33979	0.501466	0.509299	-0.0275936	0.549774	-0.151091	-0.772051	-0.0389481	-0.048939	0.18046	-0.192494	0.119182	0.521823	-0.205801
RVBD_2350c	plcB	-	FALSE	FALSE	FALSE	FALSE	-0.0596407	-0.0977014	-0.141098	0.618822	0.141498	0.0572355	0.145282	-0.665865	0.0225899	0.248289	0.290474	0.543971	-0.527351	0.0263321	0.0566481	-0.820738	0.405335	-0.386239	0.104908	-0.0407008	0.130702	0.0189468	-0.154533	0.305145	0.259886	0.250882	-0.0364403	-0.0560188	0.0572355	0.335922	-0.153544	-0.240446	0.251165	0.342215	0.489578	0.381874	0.36593	0.170061	0.156673	0.0184061	-0.008883	-0.0201101	0.0160526
RVBD_2541	Rv2541	-	FALSE	FALSE	FALSE	FALSE	-0.138059	1.29408	0.450242	-0.989589	-5.47561	1.51847	0.968701	-6.49793	-6.47935	-5.4967	1.15711	1.11398	-6.51064	1.32113	1.79077	1.65542	-2.49479	1.42875	-0.608391	-6.48759	0.989977	0.146535	1.51049	-6.47645	-1.3156	-1.55007	0.716841	-1.37212	1.51847	-2.0892	1.08218	-1.5465	0.638978	-5.47764	-6.47909	-0.285132	-6.49704	-0.0195477	-0.826553	-1.09161	0.254653	0.800324	-0.044791
RVBD_1278	Rv1278	-	FALSE	FALSE	FALSE	FALSE	0.192604	-0.120153	0.495089	0.348359	0.764627	0.0815296	0.720221	0.634188	0.713981	-0.353799	0.436246	0.387284	-0.454573	0.546042	0.290294	0.600681	0.720532	0.114786	0.607593	0.00390221	0.0189615	-0.0851858	0.265298	0.451815	0.356118	0.131201	0.768517	0.455065	0.0815296	0.503259	0.42606	0.131908	0.256683	0.956148	0.174084	-0.859808	-0.708565	0.310276	0.401612	0.306312	0.484055	0.393954	0.188017
RVBD_2253	Rv2253	mod14	TRUE	FALSE	FALSE	FALSE	0.00778289	-0.0351674	-0.0623673	-0.128647	-0.90035	0.0820801	0.206963	-0.0992673	0.502117	0.491281	0.572668	0.650595	0.689052	-0.717467	-2.81688	-1.17062	-0.0474837	-0.0797203	0.893308	-0.0653844	-0.0719758	-0.0800988	0.135744	0.483229	-1.20861	-0.546758	0.157641	-0.0557606	0.0820801	-0.0732163	-0.212424	-0.518397	0.561594	-1.47555	-2.06643	-0.288151	-0.313042	0.101957	-0.337866	0.28525	0.432934	0.114464	0.483022
RVBD_2723	Rv2723	mod18	F	F	F	F	0.166259	-0.111099	0.243469	-0.501418	-0.393885	0.29637	0.206449	0.119325	0.0644744	0.0167546	0.293812	0.110568	-0.104866	-0.152384	-0.609852	0.309977	-0.0843955	-0.0786268	0.0271842	-0.0700682	0.089444	0.111903	-0.309476	0.15401	-0.107717	-0.151515	0.123731	-0.126306	0.29637	-0.390533	0.131775	0.162404	-0.00823953	0.0633508	0.0331052	0.347602	-0.292829	0.0415361	0.366638	0.211153	0.178927	-0.0407038	0.373945
RVBD_0589	mce2A	-	FALSE	FALSE	FALSE	FALSE	0.0196296	0.381571	0.419265	-0.454429	-0.0850978	0.0718754	0.188077	0.651879	0.298885	-0.322494	0.385152	0.343638	-0.797301	-0.214892	0.119876	-0.176948	0.213361	0.00628934	-0.0834569	-0.336502	0.255351	0.460569	0.317529	-0.390033	0.0900133	0.534001	0.215503	0.140061	0.0718754	-0.596093	0.159876	0.427152	0.351024	-0.870527	0.0136045	-0.0653771	0.0107409	0.250774	0.0879415	0.0620691	0.124188	-0.197795	0.461593
RVBD_2964	purU	-	FALSE	FALSE	FALSE	FALSE	0.183422	0.0992386	-0.0423528	0.223204	-0.382505	0.393948	0.0639781	0.192287	-0.311662	-0.802593	0.477044	0.413299	-0.059952	-0.248915	0.239903	-0.0180117	-0.54946	-0.27459	-0.0786988	-0.00273071	-0.0979144	0.0164564	0.505537	0.50136	-0.120805	-0.13932	0.300599	0.0539799	0.393948	0.0313605	0.0651992	0.577059	0.10841	-0.444219	0.285925	0.0430494	0.056253	0.0411735	0.0882725	0.135918	0.227873	0.179676	0.109776
RVBD_3195	Rv3195	-	FALSE	FALSE	FALSE	FALSE	-0.234071	-0.306834	0.0563584	-0.120566	0.188789	-0.0824057	-0.0653054	-0.51558	0.0384869	-0.0252885	-0.356041	-0.372638	-0.0314391	-0.136466	-0.907699	-0.477361	-0.485159	-0.31077	-0.0444704	-0.118742	-0.116058	-0.110674	-0.149294	0.223186	-0.275008	0.0805378	-0.0976975	-0.115042	-0.0824057	-0.672236	-0.0328272	0.0539637	-0.00211032	0.0890234	-0.748271	-0.0555945	-0.26747	-0.188196	0.0146608	-0.00935806	-0.0920409	-0.0331234	-0.0177943
RVBD_0674	Rv0674	-	FALSE	FALSE	FALSE	FALSE	-0.247131	-0.103716	-0.0012362	-0.452632	-0.938297	-0.76296	0.121651	0.583392	0.791202	-7.52969	-1.47678	-0.858518	-0.737955	1.43536	2.0183	-1.30783	-1.79862	-0.789352	-0.0184923	-0.780269	-0.346641	0.583279	-1.35699	1.09735	0.046746	-0.507421	0.540996	0.0492078	-0.76296	0.293732	-0.262256	-0.212203	-0.730803	1.05238	1.4729	-1.86049	-4.20721	-0.573885	0.370185	-0.136665	0.350261	-0.192905	-0.0725121
RVBD_3412	Rv3412	mod04	TRUE	FALSE	TRUE	FALSE	0.105497	-0.313332	-0.902322	-0.623055	0.273494	0.573673	-0.835438	-0.0185709	-0.355466	0.169582	-0.500334	-0.280371	-1.05545	0.0797086	-2.59875	-0.377701	-0.526723	-0.640855	-0.42542	-0.0715333	-0.713829	-0.21754	-0.00405374	-0.951463	-0.525265	0.0911513	-0.397029	-0.341433	0.573673	0.131802	-0.479273	0.280843	-0.0780833	0.257183	-1.04691	-0.527562	0.0663994	0.0566407	0.390719	0.142115	0.0218094	-0.178236	-0.169231
RVBD_1407	fmu	mod06	TRUE	FALSE	FALSE	FALSE	-0.821584	-0.237847	-0.794751	-0.369889	0.383896	-0.460679	-0.224322	-0.470307	-0.0908172	0.548818	-0.474449	-0.206046	-0.737125	0.0742831	0.204066	-0.577558	-2.06391	-0.013154	-0.375381	0.0857787	-0.108491	-0.16088	-1.05736	0.423415	-0.647036	-0.271158	-0.260801	-0.447405	-0.460679	-0.0834497	-0.332768	-0.735862	-0.0775354	0.510404	-0.697602	-0.343955	-0.352119	-0.128464	-0.0370229	-0.261352	-0.427949	0.0600542	-0.459647
RVBD_3571	kshB	-	TRUE	FALSE	TRUE	FALSE	-0.661521	-0.785858	-0.462733	-0.984565	-0.650832	-1.04976	-1.59508	-0.783281	-0.464827	-0.916993	-0.517815	-0.331487	-1.04173	-1.38766	-0.0776368	-2.12106	-0.523213	-0.325963	-1.19334	-0.493636	-0.825979	-1.0678	-0.0220844	-0.821739	-0.41715	-0.325491	-0.503046	-0.617845	-1.04976	-0.492802	-0.759051	-0.879683	-1.06147	-2.26681	-0.529147	-1.54841	-0.915464	-0.768079	-0.571301	-0.951882	-1.02724	-0.499442	-0.402908
RVBD_2115c	mpa	-	FALSE	FALSE	FALSE	FALSE	-5.73554	-2.45306	-5.73853	-5.74205	-4.72844	-2.42346	-2.31528	0.445639	-1.61063	-4.74452	-1.73266	-6.31938	-5.75881	-5.74892	-5.74857	-4.73396	-5.74522	-5.74317	-2.41087	-5.73483	-5.74814	-5.74285	-2.21528	-5.72555	-5.73832	-5.71949	-5.73897	-5.73462	-2.42346	-4.73285	-5.73922	-4.72852	-5.73836	-4.72878	-5.72237	-2.21083	-5.74373	-5.72817	-2.41413	-5.74138	-0.672744	-1.96226	-3.34418
RVBD_2409c	Rv2409c	-	TRUE	FALSE	TRUE	FALSE	-0.529734	-0.334004	-0.469814	-0.635576	-0.09706	-0.534993	-0.406939	-0.804289	-0.77181	-0.256576	-0.410701	0.0530978	-0.280166	0.25332	0.266826	-1.36362	-0.23765	-0.0375084	-0.585535	-0.153794	-0.342018	-0.232064	0.0721773	-0.359667	-0.388665	-0.457948	-0.203134	-0.240942	-0.534993	-0.402856	-0.178237	-0.524786	-0.264673	-0.133403	-0.572418	-0.490144	-0.794042	-0.449527	-0.306462	-0.494285	-0.35663	-0.559733	-0.672613
RVBD_3672c	Rv3672c	-	F	F	F	F	-0.0737248	-0.15255	-0.0695146	-0.169927	0.808557	-0.249083	0.183582	-0.129425	-1.01591	0.165081	-0.692433	-0.00134241	-0.0432363	0.729403	0.140022	-0.0617243	1.11521	-0.0180799	0.191998	-0.155665	-0.063955	-0.548264	-0.67522	1.43532	0.228626	-0.0970676	-0.632692	-0.45371	-0.249083	-0.414932	0.0673171	-0.161574	-0.06215	0.387518	-1.02477	-0.242681	-1.55246	-0.524268	-0.149542	-0.0421115	0.0596189	-1.08738	-0.605897
RVBD_3690	Rv3690	-	FALSE	FALSE	FALSE	FALSE	-0.156421	-0.162381	-0.596165	-1.29082	1.81749	1.25258	-0.134982	0.823829	0.213055	0.992235	0.601123	0.676889	-0.155439	0.74971	-0.140133	0.60453	-0.303085	0.429312	0.0242667	0.0731423	-0.0282764	-0.284547	0.538041	1.03311	-0.326901	0.626593	0.0383382	-0.354542	1.25258	0.365013	0.140181	1.09551	-0.00454242	-1.32652	0.46267	0.517862	0.00065733	0.479402	0.326704	0.201402	0.399309	-0.385258	0.0835451
RVBD_2657c	Rv2657c	mod05	F	F	F	F	-0.00387772	0.0237481	0.370483	0.138948	0.612428	0.0653252	0.3878	-0.00120834	-0.180175	-1.43402	-0.536971	-0.0348817	-0.265988	0.331598	0.851578	1.05414	0.0251365	0.482586	0.309683	0.401033	-0.109405	0.172125	0.637618	0.228014	-0.0471472	-0.578042	0.375166	0.166559	0.0653252	-0.05809	0.0535694	-0.156214	0.221897	0.580951	-0.643945	0.491796	0.52409	0.148717	0.383993	0.382876	-0.0521245	0.100383	0.107221
RVBD_3556c	fadA6	mod05	TRUE	TRUE	TRUE	TRUE	-2.04352	-2.79213	-3.13486	-2.90205	-0.778589	-2.7364	-1.60846	-3.75044	-2.00203	-0.659936	-0.782667	-0.837406	-4.22629	-5.44371	-0.956333	-4.68696	-4.82704	-5.52312	-2.42674	-3.20107	-2.32714	-1.87729	-4.08287	-2.16777	-2.76799	-1.11683	-2.0549	-3.32858	-2.7364	-3.19358	-3.23938	-4.62647	-2.7989	-9.91058	-3.25874	-2.2342	-3.57598	-2.3495	-3.45387	-3.7543	-3.43502	-2.60544	-2.48009
RVBD_1535	Rv1535	-	TRUE	FALSE	FALSE	FALSE	-0.627311	-0.166642	-1.04418	-0.380181	-1.20191	-0.206962	-0.407846	0.114038	-0.433108	-0.359507	-0.376878	0.024953	-0.900795	0.0867131	-0.676149	-0.0527063	-1.06749	-1.06465	-0.782681	0.000274531	0.0950191	-0.362927	0.244196	-0.0371422	-0.546403	-0.159536	-0.462213	-0.253882	-0.206962	-0.0133018	-0.416364	-0.334905	-0.461716	0.398097	0.0728687	-0.258976	0.566558	-0.378464	-0.286275	0.104362	-0.448881	-0.408533	-0.572893
RVBD_3885c	eccE2	-	FALSE	FALSE	FALSE	FALSE	-0.0370154	0.187572	-0.574723	0.62248	0.0767799	-0.178385	0.382087	0.700221	-0.587683	-0.443632	0.44527	0.166009	-0.0819849	0.32909	0.630346	0.614907	0.0980758	0.448539	0.024863	0.13175	0.0336762	0.13821	-0.0965558	-0.426862	-0.546073	0.331518	0.109419	0.148244	-0.178385	0.248997	0.199017	-0.151851	0.124324	-0.284268	-0.157095	-0.482545	-0.0556583	0.279645	-0.540944	-0.111289	0.135468	0.274242	-0.046115
RVBD_0323c	Rv0323c	-	FALSE	FALSE	FALSE	FALSE	-0.265999	-0.200455	-0.25284	-0.248794	-0.0447883	-0.251632	0.106034	0.337621	-0.490066	-1.5071	0.529877	0.267093	-0.222642	-0.189093	-0.340977	-1.23326	0.42283	0.0553863	-0.525364	-0.0905716	-0.260214	-0.129922	-0.276474	-0.570063	-0.776745	0.0473449	-0.138353	-0.24999	-0.251632	-1.11049	-0.336207	-0.278099	0.12461	0.09705	0.220689	-0.322966	0.440917	-0.0667021	0.0460771	-0.237248	0.119586	0.0437523	-0.07709
RVBD_2815Bc	-	mod03	TRUE	FALSE	FALSE	FALSE	0.182704	-0.44591	0.653439	1.19251	1.21757	0.707909	0.0065674	-7.97812	1.95202	0.333289	1.00595	0.69154	1.05587	-0.820031	0.988655	-1.73805	1.14615	-0.690177	-0.483116	0.53007	0.825072	1.46147	0.924918	0.110706	0.391617	1.04198	0.0957359	-0.00257402	0.707909	1.64479	0.226532	-0.52892	0.977557	0.0256047	1.38206	1.04253	-3.27502	0.962183	0.356687	0.27047	1.54788	0.082879	0.892127
RVBD_1280c	oppA	mod11	TRUE	FALSE	TRUE	FALSE	-1.04766	-0.52121	-0.206579	-0.30123	-0.229885	-0.457873	-0.541797	-0.360459	-0.439833	-3.10669	-0.342789	-0.528029	-0.648048	-1.27716	-0.505639	-0.0332029	-0.766107	-0.575171	-0.215348	-0.879752	-0.125044	-0.505595	-0.350483	-0.412214	-0.0654726	-0.475902	-0.543582	-0.155046	-0.457873	-1.01379	-0.681918	-0.58581	-0.21905	-0.717448	0.421556	-0.116859	-0.248621	-1.01851	-0.873546	-0.812876	-0.76592	-0.997632	-0.469087
RVBD_3419c	gcp	mod20	F	F	F	F	1.28173	1.32961	0.324375	1.56542	0.783611	1.51017	0.963826	0.102943	0.42257	2.42835	0.704212	0.606644	-2.70268	0.267897	0.912734	1.90158	0.420503	0.0965558	1.10127	0.759585	-0.16819	-0.294734	-0.898398	1.08685	-0.865466	-0.849827	0.8138	0.0597802	1.51017	0.674567	0.94698	0.44345	0.568825	0.422411	-0.0229391	0.519312	0.357896	1.57067	1.62565	1.7336	2.00098	1.60468	1.16253
RVBD_0862c	Rv0862c	-	FALSE	FALSE	FALSE	FALSE	-0.0124436	-0.311007	-0.0545809	0.14432	0.855	0.119565	0.100149	-0.394392	0.37341	-0.199404	0.51717	0.270317	-0.234362	0.528624	0.578191	0.357108	-0.000548483	-0.199436	0.393031	-0.346665	0.074735	0.0681592	-0.360606	-0.284693	-0.118036	0.171606	0.216199	0.252438	0.119565	0.104598	0.149039	0.0463647	0.312525	0.0945761	-0.0978306	-0.921159	-0.187072	0.26232	0.108312	0.0348412	0.0806089	0.291262	0.037976
RVBD_1087A	Rv1087A	-	FALSE	FALSE	FALSE	FALSE	0.0703467	-0.165449	0.0327239	-0.497986	-0.161745	-0.00497699	0.0161556	-0.187947	-0.167771	-0.82407	-0.433554	-0.492215	-0.0805826	-0.255126	-0.185658	0.502599	-0.0792515	0.0854098	-0.0737227	-0.0151049	-0.0355509	-0.235032	0.0952845	-0.359061	-0.0715565	-0.141497	0.0927691	0.00604316	-0.00497699	-0.0323125	-0.0390226	-0.0306029	-0.0178986	-0.311689	0.389177	-0.0682039	0.0395728	0.0927253	-0.0515823	-0.0513053	-0.0331927	-0.0654468	-0.125022
RVBD_1325c	PE_PGRS24	-	FALSE	FALSE	FALSE	FALSE	-0.160896	0.47787	-0.242769	0.467093	-0.279337	-0.507548	-0.789251	-0.589797	0.544116	0.394376	-0.687567	-0.447106	0.021758	0.581515	-0.592168	0.648524	-0.0682389	-0.0352605	-0.309572	-0.772073	-0.0929857	-0.380784	-0.120336	-0.483034	-0.502592	0.221643	-0.0367174	-0.00620038	-0.507548	-0.104873	-0.167524	-0.567684	0.060693	-0.138554	-1.15705	-0.980106	-0.572533	-0.31681	-0.238959	-0.663784	-0.0334856	-0.172497	-0.0181772
RVBD_1491c	Rv1491c	-	F	F	F	F	-0.210574	-0.517882	-0.0998486	0.319533	-0.0163793	-0.139631	0.229449	0.23594	0.274412	0.428091	0.408966	0.264204	-0.130921	-0.237601	-0.0635947	-0.307307	-1.19529	-0.366529	-0.0788328	0.0382907	0.113516	0.0571551	-0.374262	-0.587799	-0.0416707	-0.176782	-0.0349239	-0.0153973	-0.139631	-0.43651	-0.194563	-0.151877	0.0534963	-0.138367	0.175039	-0.155135	-0.417043	-0.128854	-0.58892	-0.252448	-0.0265076	-0.140367	-0.0566505
RVBD_1539	lspA	-	FALSE	FALSE	FALSE	FALSE	-1.93554	-0.338248	-2.05165	-1.43684	-2.41273	-1.54192	-2.55207	-0.770887	-0.80104	-1.34495	-2.16552	-1.27296	-0.366328	-0.977731	-4.54173	-3.38509	0.709396	-0.424091	-0.687508	-0.712457	-1.0901	0.177057	-3.83813	-0.938841	-1.04828	0.22655	-1.54475	-1.05344	-1.54192	-0.867167	-0.218625	-1.7905	-1.01096	0.721454	-0.4908	-2.21465	-8.66658	-3.07092	-2.29077	-0.491281	-2.97038	-2.12512	-2.544
RVBD_3049c	Rv3049c	-	FALSE	FALSE	FALSE	FALSE	-0.0740846	-0.0921172	-0.066008	0.117518	-0.146289	0.00221615	-0.0427496	0.130037	0.435663	-0.613722	-0.206551	-0.134739	-0.254166	-0.0756215	0.0631801	0.0817615	-0.172895	-0.259271	-0.175864	-0.0681725	-0.058693	-0.0768362	-0.15252	-0.0817964	-0.0655472	-0.351103	-0.0477643	-0.0557451	0.00221615	-0.0464336	-0.110621	0.0951087	-0.0458107	-0.0793724	0.0207697	-0.00350077	0.189058	0.0734924	-0.0151155	0.0339949	-0.051629	-0.164091	-0.131259
RVBD_3062	ligB	-	FALSE	FALSE	FALSE	FALSE	-0.155818	-0.246723	-0.26717	-0.310262	-0.362826	-0.302105	-0.548249	-0.575394	-0.317122	0.172226	-0.353647	-0.424248	-0.258442	-0.124074	-0.495913	-0.580732	-0.434204	-0.0109007	-0.323989	-0.288791	-0.173535	-0.0244491	-0.181902	-0.169761	-0.359757	-0.186706	-0.185287	-0.0375862	-0.302105	0.00906081	-0.0838666	-0.223831	-0.0667208	-0.0457086	0.16565	-0.361018	-0.263197	-0.231322	-0.0985437	-0.290711	-0.200167	-0.0262593	-0.149657
RVBD_3174	Rv3174	-	TRUE	FALSE	FALSE	FALSE	-0.324897	-0.309295	0.190752	-1.6421	0.242492	0.083804	-0.0303885	-0.541184	-0.262147	-2.56201	0.564119	0.523146	-0.140968	-0.401395	-0.309852	-0.0864788	-0.529118	-0.964662	-0.414135	-0.722289	-0.257245	0.0185702	-0.276802	-0.455378	-0.228578	0.25917	-0.235908	-0.138948	0.083804	-0.63199	0.315646	0.0586094	0.0627936	-2.0553	-0.0316825	0.494935	-0.783062	-0.139888	0.0647282	-0.175167	0.0535916	0.155574	-0.0910771
RVBD_0540	Rv0540	-	FALSE	FALSE	FALSE	FALSE	-0.102946	-1.09199	-0.385186	-0.890953	0.720902	-0.506383	-0.919872	-1.03521	-0.166436	-0.610977	-0.60489	-0.248098	0.411417	-0.31222	-1.31133	-0.851707	0.92351	0.216107	-0.35214	0.513507	0.131449	-0.271773	0.199292	0.467635	-0.0504752	-0.188416	0.216719	0.0294227	-0.506383	-1.06498	0.432117	0.493539	-0.255681	0.605578	-0.0204819	-0.763431	-0.823448	-0.188842	-0.0718657	-0.114263	0.370853	0.206461	-0.324548
RVBD_0893c	Rv0893c	-	FALSE	FALSE	FALSE	FALSE	0.244322	0.529072	0.471131	0.538377	-0.214623	0.00211814	-0.298086	-0.397334	0.888961	0.0866991	0.607756	0.10078	0.425633	0.399678	-0.183475	-0.551879	0.436962	0.846893	0.166056	0.729666	0.317624	0.495021	0.789746	-0.396945	-0.285583	0.0752434	0.649831	0.738575	0.00211814	-1.79235	0.135581	0.926653	0.619823	0.281014	-1.04219	0.745186	0.509116	-0.37431	1.33199	0.450949	0.517847	0.25684	0.0323993
RVBD_0436c	pssA	-	FALSE	FALSE	FALSE	FALSE	0.413663	-1.80135	0.264245	-1.5148	0.274515	-1.96642	0.0191155	-8.35285	-1.47558	-1.03282	-1.95951	-0.508098	-0.71426	-1.64124	-1.02647	0.359494	-0.526508	-4.9407	-2.07476	0.241672	-0.705842	0.262498	-0.37434	-1.0709	-0.893651	-1.93629	-1.05365	-0.221207	-1.96642	-3.40344	-1.29417	-0.120895	0.286875	-7.33518	1.4371	-0.0485701	0.401478	-0.50547	-0.283738	-1.44386	-1.08437	-0.724396	-1.08434
RVBD_2565	Rv2565	mod11	F	F	F	F	-0.658583	-0.300491	-0.305238	-0.900366	-0.940193	0.259336	-0.270391	-0.869982	0.123086	0.1421	-0.414039	-0.198093	-0.0802509	0.0549324	-0.777652	-0.717512	-0.80298	-0.180186	-0.358717	-0.51157	-0.247384	-0.458245	-0.39309	-0.651927	-0.0762296	-0.617121	-0.503174	-0.598556	0.259336	0.420959	0.0263696	-0.803824	-0.0859801	-0.508553	-0.260452	-0.155587	0.0013475	0.313783	0.546663	0.292266	0.0932088	-0.118979	-0.311727
RVBD_0025	Rv0025	-	F	F	F	F	-0.480888	-0.831469	-0.00195969	-0.310395	-1.44374	-0.841254	-0.53023	-1.04886	-0.38452	0.0262875	-0.517801	-0.150577	-0.704561	-0.244205	-0.666704	1.24392	-1.47114	-0.474663	-0.27073	-0.0236031	-0.313846	-0.436592	0.330685	-0.454294	-0.842245	-0.744749	0.0994895	0.289765	-0.841254	0.131334	-0.385518	-0.540442	-0.169889	-0.328725	-0.891954	0.159768	-0.576922	-0.507188	-0.441171	0.238522	-0.367729	-0.712488	-0.224483
RVBD_0671	lpqP	-	FALSE	FALSE	FALSE	FALSE	0.449232	-0.0407201	-0.143117	-0.284164	0.253023	0.179176	-0.25067	-0.405794	-0.090723	-0.246697	0.384754	0.195387	-0.223114	-0.336684	-0.277098	0.832667	-0.0816053	0.165497	-0.233372	-0.255306	0.0272549	0.0667531	-0.404666	-0.143736	0.260883	-0.379275	-0.0384678	-0.0616181	0.179176	-0.317097	0.263172	0.524898	0.115857	-0.722278	-0.336813	0.05057	-0.167608	-0.0683122	-0.101352	0.0862607	0.238415	0.137863	0.0547876
RVBD_2863	vapC23	-	FALSE	FALSE	FALSE	FALSE	0.241148	-0.0288379	0.0429548	0.718698	-0.436814	0.0664435	0.0453446	0.119941	0.233142	0.682067	0.449115	0.201147	-0.163881	0.231305	-0.322911	-0.576727	-0.0250001	-0.0944507	-0.33742	0.17179	0.118394	0.00302073	0.248134	-1.17557	-0.0226255	-0.0721193	0.286262	-0.412837	0.0664435	0.856178	-0.147064	0.102019	0.282545	-0.2905	-0.122244	0.259818	0.321316	0.262786	0.406978	0.014474	0.110608	-0.178223	-0.148903
RVBD_2381c	mbtD	mod04	TRUE	FALSE	FALSE	FALSE	-0.404303	0.657814	-1.32015	-0.978585	-2.36234	0.139425	-0.215363	0.513553	-2.21101	-7.6154	-0.897927	-0.0221618	-4.24641	-8.61917	-3.51715	-3.32532	-8.6138	-5.19484	-0.321363	0.794085	0.525208	2.16026	-0.566413	-2.21926	0.608478	-0.116513	-1.22852	-0.731297	0.139425	-1.61776	-0.588369	-1.07269	-0.92666	-7.59808	-0.568679	-1.35124	-2.75459	0.904866	1.89777	1.42086	1.23496	-0.200996	0.334532
RVBD_2695	Rv2695	mod17	FALSE	FALSE	FALSE	FALSE	-0.312257	-0.107367	0.461121	-0.233412	0.252809	-0.0277726	0.272215	0.440092	0.620443	0.532203	0.386578	0.27229	0.292042	0.0536398	0.0293328	-0.133771	-0.2355	0.831769	0.42415	0.402815	0.459936	0.10333	0.377856	-0.0361243	-0.828305	0.0512041	0.411223	0.408269	-0.0277726	-0.155428	0.339775	-0.197685	0.210143	0.728943	0.160148	-0.680572	-0.154449	0.125525	0.270769	0.539687	0.621971	0.903275	0.361082
RVBD_1354c	Rv1354c	-	FALSE	FALSE	FALSE	FALSE	-0.43006	0.342246	0.118801	0.149387	0.380279	0.188248	0.151261	0.0627316	-0.0943817	-0.118576	0.361989	0.519808	-0.0764689	0.25366	-0.1169	-0.859627	-0.227496	0.11586	0.0866333	0.0885651	0.0498465	0.328606	0.0819462	0.234894	0.334449	-0.15168	-0.0812525	0.0878286	0.188248	-0.443164	-0.0231143	-0.0186801	-0.153453	0.00537034	0.283774	0.386449	0.105799	0.336381	0.102312	0.142794	0.190323	0.0525449	0.218094
RVBD_1891	Rv1891	-	FALSE	FALSE	FALSE	FALSE	-0.366176	-0.00551169	-0.154328	0.23955	0.360178	0.151573	0.699828	-0.0169297	-0.162565	0.0707336	0.503123	0.800762	0.323653	-0.306879	-0.506076	0.271659	0.886914	0.163595	0.595622	0.0457437	0.369438	0.102092	0.110965	-0.443047	-0.439058	0.188122	0.0831463	0.611701	0.151573	-0.688955	0.234669	0.24643	-0.16946	-0.409333	-0.515842	-0.0569301	0.415277	0.142143	0.307737	0.241217	0.271357	0.199501	-0.0211534
RVBD_3546	fadA5	mod01	TRUE	TRUE	TRUE	FALSE	-1.29471	-2.89038	-0.568757	-3.40765	-0.268384	-2.52244	0.170553	-1.78948	-0.727249	-0.931394	-0.916635	-0.722642	-4.38592	-2.08788	-1.24401	-3.46289	-5.6963	-0.448688	-2.09604	-2.77403	-1.70178	-1.57342	-0.200511	-1.86997	-1.9988	-1.10961	-0.571131	-1.02179	-2.52244	-4.05395	-2.36681	-1.29372	-2.07413	-0.504726	-2.03245	-3.28534	-0.32542	-1.01581	-1.75248	-2.19741	-2.14723	-1.39709	-2.37623
RVBD_2419c	gpgP	mod06	FALSE	FALSE	FALSE	FALSE	-1.86471	-1.60607	-2.24616	-1.43977	-1.4801	-1.90552	-1.46033	-7.73243	-1.33317	-6.72718	-1.56034	-1.0178	-0.833029	0.758931	-0.241869	-6.72311	-3.72403	-0.490685	-0.856316	-2.93229	-1.15951	-0.195579	0.666458	-0.715395	-0.529809	0.65058	-4.39312	-0.68496	-1.90552	-2.77923	-2.39317	-2.07882	0.184419	0.740277	-1.05529	-3.26488	1.37579	0.574871	-1.06661	-0.808588	-1.95363	-1.41291	-3.21847
RVBD_3433c	Rv3433c	mod06	TRUE	FALSE	FALSE	FALSE	-3.57307	-1.32518	-0.62728	-8.86491	0.275378	-1.80177	-0.38616	-8.86542	-0.391525	-1.54349	-0.912492	-0.133563	-1.64107	-0.948403	-8.87229	-7.85702	0.822219	-2.18184	-0.210847	-0.50447	-0.047245	0.307413	-0.905651	-0.0552962	-0.377107	0.83619	-1.51879	-0.72398	-1.80177	0.72404	-0.485618	-1.7697	-0.670409	-7.84638	-1.19808	-1.48016	-3.57844	-2.43365	-1.21539	-1.09123	-0.845951	-0.333421	-1.143
RVBD_2929	Rv2929	mod08	FALSE	FALSE	FALSE	FALSE	0.547385	0.463832	0.145549	0.144851	0.225081	0.317071	0.700795	0.704867	0.896589	-0.20103	0.455013	0.588481	-0.465618	-0.899742	-1.21512	-0.770987	-0.760165	-0.831813	0.241325	0.506136	0.0894812	0.861496	0.304036	-0.00497578	0.807333	0.0543897	0.281293	0.221417	0.317071	-0.257967	0.54677	0.603758	0.773409	-0.70182	-0.220188	0.651824	-0.493063	0.569569	0.995817	0.635094	0.423072	0.210051	0.503274
RVBD_0100	Rv0100	-	FALSE	FALSE	FALSE	FALSE	-2.89441	-2.63106	-1.84232	-0.772669	-0.307702	-3.42333	-1.13095	-1.64709	-4.71364	-8.80963	-1.11012	-1.36148	-3.11812	-1.79794	-0.628577	-0.544644	-2.23454	-0.892854	-3.45312	-1.45221	-1.59574	-2.38348	-4.41035	-2.27564	-1.97254	-2.31093	-1.85986	-2.39191	-3.42333	-5.40461	-2.75543	-1.18019	-2.67591	1.5679	0.337255	-2.10032	-9.8104	-1.48983	-2.44741	-1.96299	-2.5697	-1.94723	-2.37278
RVBD_0617	vapC29	-	FALSE	FALSE	FALSE	FALSE	0.216539	0.187743	-0.151159	0.694699	-0.105434	-0.524012	0.308921	-1.54583	-2.79397	0.675425	-0.811194	-0.223868	-0.574887	0.542357	-0.223936	-0.894788	-0.628899	-0.382283	-0.286433	0.0433679	-0.071067	0.115386	-0.474897	-0.896111	0.0302305	0.565913	0.104291	-0.120666	-0.524012	-1.29671	-0.330573	0.19283	-0.080607	-0.523884	-1.07317	-0.211816	-0.365803	-0.480454	-0.56551	-0.981878	-0.0391618	-0.193899	-0.415639
RVBD_0756c	Rv0756c	-	TRUE	TRUE	FALSE	FALSE	-0.585148	-0.966169	-0.630297	-0.432877	-0.709965	-0.143962	-0.29865	-0.416852	-1.09159	-0.109529	-0.385473	-0.102621	-0.379488	0.147667	-0.036646	-1.79277	-0.177879	-0.0872678	-0.288981	-0.141067	-0.553762	0.0366694	-0.410345	-0.651254	-0.745894	-0.886552	-0.271306	-0.219942	-0.143962	0.104229	-0.10404	-0.306114	0.295147	-0.710686	-0.240342	-0.821263	0.135043	-0.00333688	-0.562774	-0.165545	-0.680571	-0.0717962	-0.948182
RVBD_0991c	Rv0991c	-	TRUE	FALSE	FALSE	FALSE	-0.291125	-0.00322714	-0.291612	-0.612733	-0.36902	0.358956	-0.674615	-0.198923	-0.0730975	0.735223	-0.188152	-0.168491	-0.335978	-0.303184	-0.00499046	0.161235	0.103589	0.0617156	-0.225826	-0.386698	-0.494987	-0.614939	-0.912156	-0.180657	-0.488748	-0.40535	-0.0913855	-0.332319	0.358956	0.183022	-0.0354828	-0.00157268	-0.105327	-0.129386	0.0782095	-0.0856278	0.105743	0.0917398	0.246349	0.0926018	0.173594	-0.39163	-0.222184
RVBD_1322	Rv1322	-	FALSE	FALSE	FALSE	FALSE	0.54588	-0.041002	-0.125036	-0.809659	0.53416	1.09564	0.231729	-0.124028	0.106127	-0.150951	0.586247	0.416846	0.131175	0.280735	-0.654173	1.31482	0.102293	0.37391	0.287547	0.377843	0.447845	0.217106	0.0155387	-0.203978	0.126552	-0.379983	0.607611	0.502731	1.09564	0.598256	0.380614	0.452645	0.256823	-1.64786	-0.966655	-0.547236	-0.635596	0.983773	0.832414	0.750156	0.673988	0.489807	0.548886
RVBD_1370c	Rv1370c	-	FALSE	FALSE	FALSE	FALSE	0.217192	0.165951	0.431915	0.263877	0.286802	0.313904	0.311141	0.717487	-0.474232	-0.283654	0.535911	0.0863917	0.414563	0.246986	-0.216171	0.0779079	0.23555	-0.022493	0.482199	0.389758	0.279368	0.265692	0.0706561	0.476876	0.420822	0.235598	0.210088	0.615194	0.313904	0.797817	0.351042	0.274924	0.108483	0.577764	-0.140468	0.475743	0.227176	0.131805	0.319054	0.00555756	0.156333	0.209671	0.146419
RVBD_1494	mazE4	-	FALSE	FALSE	FALSE	FALSE	-0.195713	-0.184572	0.0834682	-0.322413	0.190001	-0.449938	0.0806002	-0.692015	-0.488135	-0.144014	-0.594096	-0.615938	-0.997766	-1.39885	-0.0509499	0.358215	-0.765839	-0.34651	0.117955	-0.892735	-0.923656	-0.249253	-0.309693	0.61371	0.168742	-0.621477	-0.399819	-0.391538	-0.449938	0.0999974	-0.63636	-0.948985	-0.222411	-1.18615	-0.823071	0.00552203	-0.435002	-0.406033	-0.296007	-0.0311666	-0.231296	-0.0576576	0.0651189
RVBD_1548c	PPE21	-	FALSE	FALSE	FALSE	FALSE	0.160111	0.171838	0.309175	0.188401	-0.100318	0.389697	0.384235	0.535099	0.729787	-0.198763	0.374133	0.602444	-0.419917	0.0794296	-0.281874	-1.0111	-0.876359	-0.0454577	-0.307811	0.298032	0.149875	-0.0168921	0.272773	0.411269	0.111596	0.53355	0.248416	0.512947	0.389697	0.102346	0.0489179	-0.155445	0.107494	-0.405825	-0.115258	0.141804	0.0559574	0.148502	0.393926	0.455264	0.43421	0.13814	0.191593
RVBD_1843c	guaB1	-	FALSE	FALSE	FALSE	FALSE	0.0415856	0.0607544	0.248743	0.225035	0.342393	-0.12583	0.104456	0.304741	0.879821	-0.421366	-0.228802	-0.109509	-0.227016	0.020936	0.104888	-0.515745	-0.110359	-0.251477	0.187665	0.100207	0.162559	0.147262	0.152441	0.401332	-0.0711328	0.179292	0.0236953	-0.02842	-0.12583	0.212692	-0.0115235	-0.0156353	0.212602	0.0667176	0.202395	-0.0673799	0.0655727	-0.0706667	-0.318456	-0.050001	-0.184544	0.141639	-0.0101532
RVBD_1957	Rv1957	-	TRUE	FALSE	FALSE	FALSE	-1.39914	-1.41792	-0.938764	-1.42626	-0.92752	-1.41468	-2.23451	-0.672883	-1.2587	-2.78927	-0.90974	-1.3666	-1.58829	-1.03796	-1.24345	-0.14205	-2.03327	-1.77004	-1.6339	-2.10743	-0.902586	-1.11747	-1.73148	-0.464595	-1.26715	-1.21358	-1.4723	-1.37743	-1.41468	-1.95411	-1.16317	-0.978599	-1.10491	-3.52881	0.309831	-1.33041	-1.37738	-0.853782	-1.3702	-1.19815	-1.06591	-1.59845	-1.41898
RVBD_2354	Rv2354	-	FALSE	FALSE	FALSE	FALSE	0.134837	0.202853	0.32814	0.670793	0.129555	0.362187	0.437796	0.566256	0.164257	-0.100978	0.603449	0.498303	0.136845	0.21333	0.215331	-0.129574	0.41514	-0.0907145	0.540169	-0.456208	0.186385	0.0402226	-0.138119	-0.138065	0.602475	0.0247551	0.292072	0.653099	0.362187	0.828109	0.493058	0.468412	0.351057	0.881916	0.213145	0.750343	-0.201159	0.16576	0.414668	0.246245	0.135682	0.341027	0.308056
RVBD_2650c	Rv2650c	-	FALSE	FALSE	FALSE	FALSE	-1.00737	-6.23685	2.2351	-5.64699	1.48293	0.57315	1.84866	1.83177	3.13069	-4.64439	2.27943	2.10103	-1.65335	-1.28642	1.68235	-4.64023	-1.64954	-2.23251	-0.122833	-5.64363	-2.4194	-5.64705	-5.64002	-5.62534	-5.63343	-5.62908	-1.10848	-0.0910916	0.57315	-1.23983	-1.78435	-4.63374	-5.63809	-4.62062	-5.62239	-5.64495	-5.64423	0.606984	1.19593	-0.908637	-5.65519	0.0676422	0.0685267
RVBD_2789c	fadE21	-	F	F	F	F	0.116803	0.142997	0.137558	0.739815	0.24923	-0.344667	-0.180739	-0.266728	0.39597	0.588149	0.647131	1.07041	0.224154	0.104965	-0.757089	-4.59503	0.183401	-0.518193	-0.0525878	0.130273	-0.0131145	-0.223373	0.58955	-0.314901	0.337016	0.110107	0.308142	-0.0484938	-0.344667	0.496347	0.0624746	1.47205	0.379466	-2.25966	0.111025	1.05749	-0.254606	0.0599429	-0.560026	0.110418	0.456627	0.194369	0.184453
RVBD_3037c	Rv3037c	-	FALSE	FALSE	FALSE	FALSE	-0.278901	-0.353401	-0.117171	-0.767998	0.288417	-0.160944	-0.47005	-0.583317	0.193958	-0.0541341	-0.486462	-0.430153	-0.754419	0.111729	-0.91804	-0.236002	-0.863825	-0.327105	-0.373002	-0.125759	-0.111762	0.0305631	0.119602	0.350793	-0.366225	-0.441285	-0.109643	-0.192352	-0.160944	-0.609441	0.0111397	0.105024	-0.0119387	-0.49132	-0.423618	-0.69458	0.0651334	-0.319909	-0.271008	-0.00605754	-0.223648	-0.121746	-0.366137
RVBD_3269	Rv3269	-	FALSE	FALSE	FALSE	FALSE	-1.68446	4.56772	3.9373	-1.69223	-0.680063	2.55457	3.58987	-1.70229	-1.68336	-0.690492	3.4124	2.55234	4.64267	-1.69247	-1.70841	-0.692565	-1.69283	-1.7114	5.08661	-1.69225	4.65746	-1.68802	3.53851	6.59937	2.71711	3.7046	-1.69436	2.30521	2.55457	4.42166	-1.70741	-0.689009	-1.69224	-0.664287	-1.68174	5.93499	-1.69744	2.62224	-1.68454	-1.6829	2.50926	0.699325	0.698115
RVBD_3301c	phoY1	-	FALSE	FALSE	FALSE	FALSE	0.0697913	-0.573009	-0.114225	-0.225215	-1.06807	-0.00960699	-0.305903	-0.487273	0.446749	-0.673493	-0.563169	-0.0539164	-0.408854	-0.371072	0.316298	-0.0608403	-0.242548	-0.324024	-0.218361	-0.344593	-0.263694	0.104405	-1.04792	0.293582	0.152523	-0.798256	-0.113706	-0.169136	-0.00960699	-0.099244	-0.0163694	-0.677494	0.0550294	-0.211655	-0.819526	0.379892	0.419175	-0.0685779	-0.000705192	-0.365852	0.23707	0.0573572	-0.454241
RVBD_3474	Rv3474	-	FALSE	FALSE	FALSE	FALSE	0.297807	0.156871	0.288848	0.284379	0.754458	0.340515	0.445492	0.710933	-0.624378	-0.682645	0.564376	0.246644	0.602334	0.38939	-0.515094	-0.100229	0.586121	0.0917612	0.622725	0.159839	-0.101026	0.393375	0.362316	0.137365	0.467683	0.153778	0.198702	0.614208	0.340515	0.700793	0.456028	0.434304	0.346975	0.327967	0.0999618	0.496531	0.20898	0.144905	0.405095	0.219781	0.292316	0.213168	0.217372
RVBD_3508	PE_PGRS54	-	FALSE	FALSE	FALSE	FALSE	-0.030667	0.00477726	0.160995	0.270305	0.268168	0.194902	0.233908	-0.281969	-0.569379	0.402797	0.616134	0.316875	0.540411	0.616813	-0.0268808	-0.00481358	0.344386	0.487376	0.403137	0.116286	0.165654	0.0766929	-0.188288	-0.356983	0.223456	0.260196	0.289974	0.618151	0.194902	0.99629	0.278081	0.313185	0.265974	-0.470051	-0.0110512	-0.125613	0.126807	-0.0889187	0.127067	-0.102727	0.135526	0.154822	0.0882753
RVBD_3778c	Rv3778c	-	FALSE	FALSE	FALSE	FALSE	-1.68446	-2.28379	-1.70071	-1.69223	-0.680063	-1.69024	-1.69979	-1.70229	-1.68336	-0.690492	2.56495	-2.27376	-1.70071	1.73205	-1.70841	-0.692565	-1.69283	-1.7114	-1.6968	-1.69225	-1.69453	-1.68802	1.82517	-1.67827	-1.67646	-1.68556	-1.69436	-1.70026	-1.69024	-0.683408	-1.70741	-0.689009	-1.69224	-0.664287	-1.68174	-1.71091	-1.69744	-1.68759	-1.68454	-1.6829	-1.69085	-1.68491	-1.70481
RVBD_0085	hycP	mod20	FALSE	FALSE	FALSE	FALSE	-0.0481284	0.128376	-0.823854	1.34033	-7.26341	0.231871	0.0833214	0.0904755	-0.395544	0.981183	1.46454	0.959681	-4.29451	-1.8892	-8.28843	-7.27519	-0.393842	-0.984811	-0.718757	-1.40948	-0.298045	-1.14437	0.666037	-0.997171	-0.599771	0.131889	-0.129113	0.90374	0.231871	-1.08966	0.281604	-1.08579	0.037699	1.80451	-1.60487	-1.61278	-1.80497	0.965694	-0.000967594	0.0914163	0.335538	1.39427	-0.194586
RVBD_0341	iniB	-	FALSE	FALSE	FALSE	FALSE	0.0324785	0.130916	-0.272875	-0.610991	0.00292345	0.502808	0.244918	-0.769917	0.344254	-0.396327	0.487205	0.468639	-0.364774	0.642822	-0.948224	-0.667278	-0.0836219	0.338037	-0.210957	-0.337871	-0.167971	0.046908	-0.438819	0.576023	-0.148777	0.450656	0.234812	0.0533525	0.502808	0.109808	0.106148	0.442511	0.247784	0.540438	-0.0501251	-0.171978	-0.633042	0.110367	0.0038316	0.163208	0.191694	0.29301	0.0884887
RVBD_2680	Rv2680	mod05	TRUE	FALSE	FALSE	FALSE	-3.19587	-1.39432	-1.5807	-8.49162	-2.23634	-0.689116	-1.32981	-8.49122	-8.48206	-1.17016	-0.749662	0.0764488	-2.01713	-2.83437	0.742282	-2.24653	-0.449259	-0.0845013	-3.28812	-1.99143	-2.58225	-0.792847	-0.275776	-2.10253	-1.5149	-2.09879	-0.570162	-0.228805	-0.689116	-0.964752	-0.571909	-0.629087	-1.35351	-7.47342	-0.930448	-0.303338	-0.816591	-0.328038	-0.909355	-0.976877	-1.09632	-0.0167789	-1.1224
RVBD_0469	umaA	mod20	TRUE	FALSE	FALSE	FALSE	0.00728992	0.330588	0.293424	-0.831619	-0.30204	0.0179595	0.631569	0.0307808	0.0300605	-2.71121	0.37032	0.0195598	-1.4976	0.423819	0.0530791	0.0316266	-0.145867	-0.00515073	0.208665	-0.479832	-0.117677	-0.463224	-1.07583	0.309733	-0.44654	-0.167885	-0.0788924	0.104377	0.0179595	0.255449	-0.196406	-0.289303	0.206507	0.11654	-0.631825	0.364771	0.226023	0.0548879	0.386802	0.130723	-0.0147604	0.347264	0.513656
RVBD_2358	smtB	-	FALSE	FALSE	FALSE	FALSE	-2.56209	-2.40917	-3.1031	-3.12432	-0.490775	-3.60413	-1.98541	-0.937296	-1.55985	-7.43134	-1.66466	-1.59651	-1.82465	-8.43255	-8.43978	-3.15171	-3.87593	-1.478	-1.30657	-0.704313	-3.95909	-2.15948	-1.2632	-1.15077	0.212143	-0.425625	-0.557184	-0.765408	-3.60413	-4.0259	-1.38895	-7.41741	-1.70781	-7.41226	-0.226292	0.0722661	-8.43346	-1.15335	-0.880787	-0.438348	-1.44476	-2.12302	-0.558407
RVBD_1331	Rv1331	mod11	TRUE	FALSE	FALSE	FALSE	-0.514634	-0.50124	-1.13688	0.0991966	-0.573842	-0.892145	-0.438908	-0.541103	-0.974171	-2.40571	-0.563352	-0.782374	-0.463206	-0.740774	-0.473207	-1.20773	-0.582635	-0.137817	-0.580037	-1.2712	-0.533914	-0.24865	-0.6911	-0.842215	-0.494937	-0.411701	-0.959929	-0.628165	-0.892145	-1.18423	-0.754312	-1.28578	-0.983376	0.329615	0.328016	-0.418145	-1.31413	-0.975968	-1.92214	-0.700369	-0.989478	-0.981536	-1.08048
RVBD_3818	Rv3818	mod11	TRUE	TRUE	TRUE	FALSE	-0.345981	-1.5146	-0.586477	-3.57491	-1.99506	-0.907092	1.1547	-0.708484	-0.601906	-1.4169	0.549613	1.00424	-0.391334	-1.31885	0.988741	0.00092339	-1.51352	-2.33639	-1.65098	-1.67679	-1.83745	-2.15308	-1.51127	-2.67617	-1.67885	-1.06897	-0.668674	-1.04365	-0.907092	-1.61588	-1.07757	-0.615424	-0.899297	-1.70016	-3.58662	-1.57214	-1.3409	-0.438908	-0.533673	0.0816072	-0.209458	0.262963	-0.174566
RVBD_3166c	Rv3166c	-	F	F	F	F	0.171574	-0.0908155	0.00718608	0.00411999	-0.0010268	-0.213924	0.560493	-1.11875	-0.696971	-0.0187315	0.51862	0.702621	-0.919116	-0.111164	-1.21419	-2.86464	0.446486	-1.16358	0.378549	-0.277545	0.155772	0.104598	0.586788	-0.407085	-0.407015	0.561733	0.176085	0.184911	-0.213924	-1.3446	-0.269402	-0.205079	0.14307	-0.0480197	-0.0661842	-0.487685	-0.654632	0.211949	-0.324504	0.452877	-0.0553489	0.459459	-0.109751
RVBD_2398c	cysW	-	FALSE	FALSE	FALSE	FALSE	-4.91844	1.58431	1.70596	1.26864	1.33041	4.30094	0.37175	-4.92258	-4.89855	5.32965	1.47501	3.41514	2.88723	1.80585	-4.9227	0.363482	-4.91494	4.15889	2.21662	2.26372	2.45909	-1.07039	-0.660879	-4.89607	2.63084	-4.90484	3.48497	1.2114	4.30094	1.70005	1.1691	0.0357352	1.32537	-3.8966	1.76184	0.977894	-4.92027	1.32544	4.51923	2.76278	2.75206	2.68829	1.90765
RVBD_2957	Rv2957	-	FALSE	FALSE	FALSE	FALSE	-0.0326506	0.236508	0.240341	-0.18772	-0.35124	0.0582226	-0.358757	-0.438736	-0.159888	0.238097	0.260569	0.211919	-0.107027	-0.0693172	-0.337807	-0.0851799	-0.438117	-0.246724	-0.0113635	0.128175	0.0449046	0.103973	0.125644	0.223544	0.440954	0.144247	0.0149733	-0.141314	0.0582226	0.328526	-0.0819922	-0.170504	0.0267251	-0.0553117	0.1313	0.160143	0.0317462	0.0673077	0.083968	0.18879	0.173134	0.0408884	0.224294
RVBD_2799	Rv2799	-	TRUE	TRUE	TRUE	TRUE	-0.965827	-1.11965	-0.950825	-0.621347	-1.41034	-0.996392	-0.688118	-0.53276	-0.465981	-0.666446	-0.263194	-0.187817	-1.18365	-1.21851	-0.537085	-1.12739	-1.2386	-0.782009	-1.13696	-0.871688	-0.875982	-1.37012	-0.571571	-0.947945	-1.0319	-0.63648	-0.781815	-0.953134	-0.996392	-0.437334	-0.621442	-0.527326	-0.95515	-0.395601	-0.657898	-1.14462	-1.72136	-1.15304	-1.09154	-1.0692	-1.01999	-0.992874	-1.02774
RVBD_0437c	psd	-	FALSE	FALSE	FALSE	FALSE	-5.36486	-2.64829	-5.37541	0.932084	0.878054	-2.05605	0.964238	-5.37822	-1.25327	-4.37781	1.30641	1.97254	-5.39296	-5.37911	-5.38966	-4.3731	-5.37891	-5.38279	-0.164706	-0.579416	0.432749	-0.577022	-2.02341	-5.36403	-5.36738	-5.36202	-5.37943	-5.37163	-2.05605	-0.434497	-1.52365	-4.37195	-1.55362	-4.36122	-5.36483	-5.38409	-5.37767	-1.98357	-5.3681	-2.11898	-0.819904	0.452828	-2.98057
RVBD_2312	Rv2312	-	FALSE	FALSE	FALSE	FALSE	0.33038	0.388189	-0.111036	-0.182047	0.395797	0.529027	0.578997	0.843235	-0.56774	-0.380744	0.458526	0.450433	-0.467231	0.547068	-0.613096	0.466091	-0.276869	0.459328	-0.262662	0.212236	0.342822	-0.0157186	0.391082	0.338542	0.541757	0.296251	0.363516	0.110343	0.529027	0.606999	0.370573	0.118844	0.31604	1.123	0.365009	-0.646353	0.125771	0.463156	0.358772	0.322511	0.441316	-0.183302	0.233339
RVBD_1918c	PPE35	-	FALSE	FALSE	FALSE	FALSE	0.178789	0.100177	0.162277	0.0110403	0.0575031	0.0579325	0.232021	-0.256692	-0.246138	0.204448	0.269333	0.213045	-0.0851274	-0.213513	-0.16956	0.111677	-0.0281975	0.108557	0.157445	0.18381	0.0868034	0.0780921	-0.164288	-0.396468	0.0233068	-0.251744	0.0959429	-0.060163	0.0579325	0.0308508	0.145936	0.249353	0.166609	0.213181	0.0334231	0.0253718	-0.435833	0.137623	0.0691924	0.232106	0.240902	0.0734178	0.229685
RVBD_2123	PPE37	-	FALSE	FALSE	FALSE	FALSE	-0.0526216	-0.101275	-0.0484296	0.0816286	-0.0676351	0.104141	-0.0744606	0.027572	0.00890527	-0.581166	0.385779	0.272184	-0.0732105	0.0860019	-0.0526369	-0.934598	-0.857605	0.0459993	0.0183053	0.189815	0.138302	0.344588	-0.225316	0.0190623	0.151379	0.193154	-0.0990419	-0.0930822	0.104141	-0.382606	-0.215356	0.178384	0.128256	0.0139082	-0.416882	-0.194563	-0.665639	0.26101	0.0258002	-0.0393973	0.148773	-0.0156691	-0.0366412
RVBD_0181c	Rv0181c	-	FALSE	FALSE	FALSE	FALSE	0.268357	-0.306286	0.148171	-0.57491	-0.27268	-0.0661461	0.196957	0.326262	-0.0172483	-0.855231	0.404226	0.176122	-0.513103	-0.165751	0.254894	0.133174	0.77574	0.0766171	-0.191326	0.878382	-0.474243	-0.572941	-0.256372	0.494779	-0.352378	-0.126501	-0.353703	-0.741906	-0.0661461	0.0296084	-0.429688	-0.199804	-0.374463	0.589101	-0.497273	-0.268518	-0.260371	-0.147538	-0.348368	-0.286769	-0.368245	-0.305011	-0.259141
RVBD_2966c	Rv2966c	-	TRUE	TRUE	FALSE	FALSE	-7.52835	-2.53766	-2.37334	-7.52984	-6.51546	-1.4936	-1.35119	-7.53594	0.540341	-6.53071	-1.0869	1.18748	-0.0537187	-0.670277	-1.14907	-2.25122	-1.10923	-0.880605	-1.88515	-0.835635	-1.95906	-2.158	-1.13156	-0.325128	-2.25357	-0.690229	-1.10114	-1.23333	-1.4936	-1.63305	-1.89921	-6.5151	-0.352687	1.85905	-7.51643	-4.00245	-7.53358	-1.58464	-0.87704	-1.72837	-1.14143	-0.891167	-2.38868
RVBD_2015c	Rv2015c	-	FALSE	FALSE	FALSE	FALSE	-0.0370996	0.0737528	0.146701	0.215397	0.227372	0.158694	0.0953471	0.565335	0.175312	-0.419568	0.33823	0.306358	0.192003	-0.0557796	-0.105482	0.163815	0.0156471	0.0812222	0.173386	0.258524	0.0660393	0.099733	-0.0290208	-0.134062	0.149442	0.105831	-0.0682239	0.168929	0.158694	0.521895	0.120237	-0.0921807	0.074873	-0.0665583	-0.42125	0.161269	-0.270177	0.161796	0.0894489	0.233171	0.212767	0.262736	0.192203
RVBD_2599	Rv2599	-	FALSE	FALSE	FALSE	FALSE	-0.219078	-0.0836715	-0.12092	0.064244	-0.291386	-0.240085	-0.191602	-0.400745	0.186834	0.240796	-0.377606	-0.172025	-0.21883	0.167853	-0.271492	-0.357007	0.422979	-0.204352	-0.0316883	0.066332	-0.0505675	-0.396619	-0.152948	0.498926	0.0586904	-0.0663737	-0.153902	-0.209399	-0.240085	-0.679681	-0.0884858	0.0427491	-0.281024	0.220702	0.330571	0.129826	-0.401188	-0.18854	-0.0733266	-0.327801	-0.0736753	-0.267001	-0.251079
RVBD_0154c	fadE2	-	TRUE	FALSE	TRUE	FALSE	-0.1176	-0.722327	-0.872861	-0.395188	-0.824871	-1.5774	0.362797	0.123147	-1.21402	-0.464948	-0.488169	-0.705807	0.112497	-0.121776	0.778544	0.0101644	0.0615711	-0.824566	-0.39935	-0.426317	-0.681751	-0.593207	-0.315852	-0.605245	0.0875055	-0.266925	-0.48006	-0.118794	-1.5774	-0.461555	-0.67532	-0.924716	-0.436794	0.445338	0.0346452	-1.37882	-1.36889	-0.367229	-0.589839	-0.76456	-0.96461	-0.1422	-0.752057
RVBD_1518	Rv1518	-	FALSE	FALSE	FALSE	FALSE	-0.203721	0.235796	0.0757671	0.665013	0.203381	0.209814	0.877201	-0.449957	0.136354	-2.41772	0.578802	0.977404	0.659713	0.033942	-0.466352	-0.481537	-1.13571	0.574294	-0.096288	-0.255875	0.131559	0.139771	0.820559	0.102669	-0.19658	-1.08397	0.302099	-0.322395	0.209814	0.689244	0.187197	0.280573	0.101191	-0.508919	0.159698	0.24899	-0.529564	0.00411902	-0.113035	-0.00623206	-0.514946	0.256412	0.114884
RVBD_2026c	Rv2026c	-	F	F	F	F	-0.515324	0.0100037	0.114225	-0.256191	-2.21914	-0.426927	-1.24475	-0.466537	-5.31553	0.632648	-0.944022	-0.86182	-0.191722	0.830683	-0.149539	-2.6395	1.21217	0.0863618	-0.788622	0.436262	-1.17926	0.26464	-1.68204	-1.33586	-0.532633	-0.363284	-0.502764	-0.272634	-0.426927	1.24649	0.167511	-0.322911	0.439589	-2.8227	0.558141	-0.564362	-0.518961	-0.223592	-0.0394235	-0.0372148	0.154375	-0.796962	-0.024583
RVBD_2404c	lepA	mod05	TRUE	FALSE	TRUE	FALSE	-0.253311	0.138929	0.108221	-0.283134	0.149816	-0.717374	-0.250027	0.542324	0.0648752	-2.6303	-0.36202	-0.113679	-0.673382	-0.902736	-0.267189	-0.626526	-0.499197	-0.369141	-0.27398	0.378939	-0.00263671	-0.135332	0.189088	0.148206	0.117827	0.25144	-0.49771	-0.71216	-0.717374	-1.31094	-0.668996	-0.534059	-0.256267	-0.77768	0.232057	0.387226	0.292911	-0.202965	0.34549	-0.0769752	-0.12692	-0.24052	-0.277135
RVBD_2931	ppsA	mod08	TRUE	FALSE	FALSE	FALSE	1.53552	0.798749	0.818765	0.721413	0.855787	1.15981	0.741	0.647219	1.12654	0.835483	0.261402	0.423226	-1.07496	-2.10106	-0.264096	-1.31925	-0.573291	-0.507762	0.222712	1.24829	0.48327	0.651243	-0.0468299	1.03374	1.49799	1.11579	1.39889	1.02255	1.15981	0.180078	0.652156	1.18112	0.880945	0.336613	1.50438	0.781063	0.751423	1.45106	1.38125	1.42809	0.913208	0.775199	0.753141
RVBD_1126c	Rv1126c	-	FALSE	FALSE	FALSE	FALSE	-2.62328	-7.1543	-6.55702	-6.5679	-5.54469	-2.28735	-6.56596	-6.5636	-6.5519	-5.56321	1.57725	0.975443	-6.58247	-6.5653	-6.57711	-5.55849	-6.55949	-6.57009	-1.04274	-6.55306	-3.32173	-6.56144	-2.19779	-6.54922	-6.55238	-1.162	-1.20735	-0.599509	-2.28735	-5.55936	-6.56623	-5.55385	-6.56265	-5.54806	0.107258	-6.57419	-6.56574	-3.17546	-6.55416	-1.42387	-0.881661	-4.18554	-2.76027
RVBD_3558	PPE64	-	FALSE	FALSE	FALSE	FALSE	0.159789	-0.18354	0.328214	0.60776	0.468891	0.155205	0.528624	-0.478496	-0.0400141	0.0202037	0.33227	0.176708	0.114928	0.0647083	-0.496491	-0.587912	-0.301384	0.341441	0.305342	0.144617	0.127448	0.274857	0.543953	0.22843	-0.145594	0.348307	0.215202	0.37378	0.155205	0.0905904	0.390487	0.652689	0.345772	0.365802	0.264604	0.181701	-0.587316	0.0309253	0.0963806	0.425517	0.47538	0.0131597	0.370515
RVBD_3750c	Rv3750c	-	FALSE	FALSE	FALSE	FALSE	-0.0852871	0.293681	-0.0105859	0.412591	0.733645	0.46423	0.651575	-0.347958	0.341591	-1.11347	0.475011	0.432957	0.210102	-0.0338475	0.947691	0.630012	-1.10706	0.654262	-0.400269	0.606659	0.653678	-0.304021	0.402102	0.353944	0.0603018	-0.737327	0.0926321	0.303196	0.46423	-0.882717	0.203597	0.146731	0.648804	-0.366792	-0.0596149	0.732471	1.42157	0.133697	0.108481	0.525462	0.244189	0.241163	0.442011
RVBD_0974c	accD2	mod06	TRUE	FALSE	FALSE	FALSE	0.322776	-0.830821	0.962089	-0.552183	-2.22856	0.307196	0.980318	0.932452	-0.0516787	-7.48867	0.882497	0.162806	-1.16976	-3.49878	-0.785264	-2.24284	-2.22843	-0.939033	-1.22044	0.219024	-0.842864	-0.921359	-2.24309	-1.20787	-0.951383	-2.06886	-0.589788	-1.653	0.307196	-2.18963	-0.731352	-1.61388	0.972613	-1.85945	-0.540136	-1.88579	-8.48781	0.660007	0.377994	-1.36731	-0.71627	-0.317634	-0.180951
RVBD_2183c	Rv2183c	mod11	FALSE	FALSE	FALSE	FALSE	-2.45024	-0.153165	-1.74706	-2.20896	-7.5043	-3.27617	-0.670038	-2.33244	-3.41725	1.0351	0.996956	0.824275	-0.762465	-1.7798	-2.37116	-7.51698	0.528348	-1.67094	-0.105954	-1.33892	-1.41166	-1.17698	-5.01438	-2.3317	-0.20332	-0.0863116	-1.72741	-2.10358	-3.27617	0.302004	0.162029	-0.651574	-0.634277	-0.990385	-1.85211	-2.5338	-1.324	0.00977986	0.0348701	-1.53994	-0.100857	0.090932	-0.866902
RVBD_2173	idsA2	mod12	TRUE	FALSE	FALSE	FALSE	0.216209	0.246025	-0.0313124	0.20411	0.407841	-1.58061	-0.335812	-2.79181	0.841228	-7.98029	0.834783	0.634349	0.00382799	0.00898591	0.923614	-2.74287	1.70945	0.758801	-0.290085	0.451811	1.12822	0.210796	-2.33346	-0.107807	0.0297854	-2.31404	-1.25459	-1.02604	-1.58061	-1.24729	-1.18439	-2.10573	-1.2282	-7.96127	-2.30461	-1.02333	-1.51543	-0.633971	-1.20235	-1.95137	-1.58481	-0.849979	-0.639641
RVBD_0309	Rv0309	mod13	TRUE	FALSE	TRUE	FALSE	0.390877	-0.294642	-0.2756	-0.0330171	-0.0744656	0.443063	0.520134	-1.09309	-0.0288256	0.589093	0.529973	0.363837	-0.0266903	-1.72389	-2.71554	-3.35179	-1.19488	-0.932442	-0.0050323	-0.501731	-0.499695	-0.126741	0.162246	-0.139178	-0.368423	-0.0234231	-0.341075	-0.294986	0.443063	0.413066	-0.743253	0.781438	-0.0549044	-0.837417	-0.924911	-0.169116	-0.313694	0.511764	0.803295	1.10657	1.26394	0.468458	0.574074
RVBD_1496	Rv1496	mod19	TRUE	FALSE	TRUE	FALSE	-1.24556	-1.0873	-1.11314	0.0637603	-1.68698	-0.376139	0.643321	-2.36154	0.037188	-0.0951913	0.646891	0.686275	0.255576	-0.178528	-0.729854	0.592665	-1.41247	-0.627973	-0.75145	-1.57356	-1.07087	-1.04205	-0.0669826	-2.05165	-0.28634	0.240183	-0.741813	-1.2047	-0.376139	0.434506	-0.497775	-1.6959	-0.810525	-0.807103	-0.0871141	-0.19811	-0.62312	0.135244	-0.422519	-1.2033	-1.67083	-0.859292	-1.57155
RVBD_0693	pqqE	mod20	F	F	F	F	-0.575154	-0.600986	-0.0736951	-0.544872	-0.08148	-0.535643	-0.195893	-0.754371	-0.671155	0.353049	0.450377	0.136347	-1.03144	-0.283513	-0.337686	0.534918	-0.967449	-1.21251	-0.403393	-0.635594	-0.69713	-0.255906	-0.545334	-0.926486	-0.251162	-0.36646	0.00472052	-0.361447	-0.535643	-0.186788	-0.474377	-0.155781	0.249549	-0.620441	-1.31743	-0.576259	-2.19855	-0.0145894	-0.527154	-0.411112	-0.442042	0.0892599	-0.440252
RVBD_0077c	Rv0077c	-	F	F	F	F	-0.0706943	-0.108781	0.362192	-0.187085	0.406839	0.124904	0.12592	-0.355641	0.219525	0.476528	0.353724	-0.111744	-1.29135	-0.0996305	-0.158068	-0.529149	-0.759461	-0.512028	0.0924677	-0.00945106	-0.204765	-0.20755	0.0217926	-0.165264	0.240645	0.273217	0.294241	-0.385918	0.124904	0.254775	0.245094	0.244521	-0.0396351	-0.547669	0.0829314	0.0616172	0.0135135	-0.000422357	-0.013264	0.201176	-0.0420647	-0.0891252	-0.0496314
RVBD_0083	Rv0083	-	TRUE	FALSE	FALSE	FALSE	-0.49963	-0.603866	-0.350183	-0.788285	-0.25397	-0.340602	-0.119577	-0.883133	-0.499291	-0.910449	-0.328724	-0.287139	-1.12356	-0.0375905	-0.235009	-0.292296	-0.169652	-0.365852	-0.290445	-0.562449	-0.2462	-0.377239	-0.139409	-0.492753	-0.566945	-0.292404	-0.465862	-0.376277	-0.340602	-0.867052	-0.414388	0.0760991	-0.169454	-0.0206466	-0.170735	-1.26018	-0.767825	-0.233911	-0.300337	-0.410564	-0.252237	-0.447986	-0.384393
RVBD_0459	Rv0459	-	FALSE	FALSE	FALSE	FALSE	-1.70866	-0.300861	0.0157629	-0.739905	-0.790143	-0.253155	-0.198213	-0.450988	0.705531	1.69041	0.681503	0.697866	0.702896	-1.36913	0.431949	-2.91434	-0.179035	0.494885	-0.542967	0.594522	-0.0916575	0.39121	-0.991651	0.582788	0.686781	0.497842	0.122952	-0.321161	-0.253155	-0.231567	-0.638231	-0.190635	-0.0507889	0.370211	0.431416	0.903998	-1.09735	0.00807848	-0.302534	-0.441186	0.0165195	0.219603	-0.11553
RVBD_0680c	Rv0680c	-	TRUE	FALSE	TRUE	FALSE	-0.867884	-0.779941	-0.426018	-1.98041	-2.33283	-0.661219	-0.478493	0.043435	0.0879224	-0.342084	0.621036	1.25491	-1.24982	0.028202	-2.04533	-1.69231	0.533543	-1.21551	-0.696184	-1.33731	-0.933834	-1.02118	-1.28902	-0.348697	-0.707053	-0.652566	-0.460207	-0.44872	-0.661219	-0.0118419	-0.398138	-1.04373	-0.59005	0.507775	-1.04446	-0.639779	0.011884	-1.08351	-0.153707	-0.233048	-0.57846	-1.69063	-0.472701
RVBD_1526c	Rv1526c	-	FALSE	FALSE	FALSE	FALSE	0.452585	-0.108567	0.275496	-1.24448	-0.164148	0.332193	0.500985	-0.850119	0.953802	1.17806	0.674893	0.891182	-0.0721894	0.118171	-1.31708	0.813115	0.474662	0.668771	-0.024105	-0.562142	-0.139887	0.408959	-0.221853	-0.756969	0.529588	-0.195926	0.140121	-0.0442462	0.332193	-0.0612932	-0.202277	-0.206794	0.354619	-1.04726	-1.20624e-05	0.603749	0.30997	0.342832	-0.221376	-0.147391	-0.203233	0.272404	0.491561
RVBD_2258c	Rv2258c	-	TRUE	FALSE	FALSE	FALSE	-0.0793375	-0.325905	-0.712702	-0.275678	-1.48621	-0.319276	-0.402714	-0.613478	-0.375722	0.0485544	-0.385854	-0.421233	0.199885	-0.193015	-0.4359	0.315494	-1.1111	-0.48232	-0.28062	-0.305146	-0.169962	-0.498739	-0.586353	-0.330371	-0.654111	-0.334459	-0.461442	-0.319683	-0.319276	-0.0644102	-0.00669459	0.118526	-0.0366437	-0.115828	-1.01816	-0.401423	0.435267	-0.251649	-0.197199	-0.32765	-0.329278	-0.234782	-0.681408
RVBD_2558	Rv2558	-	FALSE	FALSE	FALSE	FALSE	-0.471729	-0.00397184	-0.0637779	0.135182	0.0399768	0.00641123	0.214109	-0.457767	0.172177	-0.790287	0.336697	0.239125	-0.387839	-0.492989	-0.584682	-0.144799	0.111428	-0.295198	-0.144095	-0.174293	0.0197207	0.0409342	-0.435334	-0.227521	0.0442332	-0.688059	-0.215375	-0.121668	0.00641123	0.100083	-0.158204	-0.329361	-0.162758	0.0312369	0.308287	-0.932373	0.0637995	-0.322033	-0.266408	0.00786275	0.034477	-0.279339	-0.385169
RVBD_2731	Rv2731	-	FALSE	FALSE	FALSE	FALSE	0.185565	-0.099262	0.458108	-0.443638	-1.54701	0.279781	0.515821	-0.165812	0.800454	-0.968327	0.57561	0.483373	-0.171993	0.690837	-0.72532	0.724359	1.52502	0.583711	-0.600466	0.25741	-0.130012	0.293911	0.497437	-0.0939562	-0.0831386	-0.764571	-0.281057	-0.709161	0.279781	-0.273225	-0.491341	-0.0492747	0.0712334	0.659609	-0.0708021	-0.625929	0.168824	-0.384983	0.761502	0.190113	0.384268	0.188926	0.319276
RVBD_2775	Rv2775	-	FALSE	FALSE	FALSE	FALSE	0.226323	0.269057	0.195199	0.46541	-0.0181194	0.230381	0.333083	-0.174833	-0.0678675	-0.360396	0.481159	0.634401	0.101301	0.292896	0.678867	1.03276	-0.155897	0.115761	0.15589	-0.305752	0.134062	-0.0589991	-0.34464	0.537928	0.0174029	-0.098143	0.0717624	-0.0753905	0.230381	0.614044	0.00737912	-0.593386	0.322368	-0.155843	-0.552912	-0.377621	0.170164	0.0464931	0.206988	0.147636	-0.104161	0.0318247	-0.00067286
RVBD_2825c	Rv2825c	-	FALSE	FALSE	FALSE	FALSE	-5.3002	-0.229471	-0.335137	-5.30556	-4.28192	1.95888	2.49512	0.883753	-5.29559	-4.31239	1.41476	1.85124	-0.619569	-5.31047	-5.3163	-4.30093	-5.30956	-5.31209	-1.07217	0.0554038	-2.07714	-1.05722	-5.30423	-5.29269	0.418992	-5.28922	1.2565	2.64038	1.95888	0.989462	0.754756	1.15727	0.744648	-4.29612	1.37178	-5.31008	-5.30929	1.34291	-1.05754	1.45871	1.23892	1.6397	0.807979
RVBD_3142c	Rv3142c	-	FALSE	FALSE	FALSE	FALSE	0.439054	0.376104	0.516321	-0.454746	0.366914	0.469528	0.306557	0.267237	-0.217395	0.369833	0.39314	0.281597	0.382099	0.0779276	0.171152	0.129396	-0.16317	0.264999	0.338277	0.3696	0.312029	0.224163	-0.00124032	0.27147	0.287735	0.58365	0.258834	0.320661	0.469528	0.630202	0.143718	0.24475	0.423633	-0.421633	0.700741	0.221401	0.525669	0.37456	0.268396	0.384491	0.161811	0.273105	0.315799
RVBD_3237c	Rv3237c	-	F	F	F	F	-0.0241002	-0.0460671	-0.669931	-0.351711	-0.214578	-0.625207	-0.503503	0.848833	0.271026	-0.100331	-0.505856	-0.93825	-0.268032	-0.747504	-0.322646	-1.26	-0.089394	0.117714	-0.905803	-0.323845	-0.665429	-0.362793	-0.641843	-0.645859	-0.249174	-0.191934	-0.927146	-0.418726	-0.625207	-0.494123	-0.284974	-0.484131	-0.467164	-0.287994	-0.603611	-0.0474561	-1.46571	-0.0429426	-0.319695	-0.173392	-0.251851	-0.450808	-0.279207
RVBD_3656c	Rv3656c	-	FALSE	FALSE	FALSE	FALSE	0.0845616	-0.554832	0.487891	-0.0819548	0.673639	0.624394	1.79245	0.871082	0.0227245	0.242273	0.832278	0.445112	0.80859	-1.50317	-0.923718	0.923089	1.45526	0.592809	0.468154	-1.4683	-0.192779	-0.150812	-0.449244	0.721757	-0.871184	-2.6733	0.0789576	-0.145686	0.624394	0.528846	-0.126402	-0.663842	-0.0893781	0.967258	-1.52387	-1.1476	1.04413	-0.0671083	-0.0914151	-0.0290662	-0.0451526	0.682894	0.321798
RVBD_1962c	vapC35	mod05	TRUE	FALSE	FALSE	FALSE	-0.477292	-0.201143	-0.29142	-0.470284	-0.628066	-0.561282	0.0101339	-0.546952	-0.969952	-0.664361	-0.328559	-0.107236	0.173609	-0.950509	-1.47773	-1.01245	-0.440294	-0.306932	-0.480692	-0.942219	-0.653911	-0.117664	-0.497199	-0.907546	-0.198297	-0.263276	-0.089186	-0.428989	-0.561282	-0.0957999	-0.193511	-0.237327	-0.568614	-0.961276	-0.333023	-0.28837	-0.409547	-0.15773	-0.146349	-0.315819	-0.143441	-0.309966	-0.487712
RVBD_1051c	Rv1051c	mod20	TRUE	FALSE	FALSE	FALSE	0.122656	-0.599238	-0.30792	-8.70361	-7.68693	-0.787953	0.988169	-0.00346184	1.22291	0.961601	1.11159	0.680654	-0.533236	-2.57379	-4.57752	-7.69525	-8.69969	-5.28877	-0.23411	-0.14277	-0.815924	-1.66715	-3.37577	-0.339628	-0.0610454	-0.0988286	1.01476	0.999373	-0.787953	-0.109198	-0.227178	-0.616027	0.304398	-0.0921046	0.213117	0.155561	-0.175213	0.362044	-0.156143	-0.352704	0.574496	0.124932	0.673818
RVBD_2809	Rv2809	-	F	F	F	F	-0.266524	-0.172999	0.158358	0.059606	0.501571	-0.0888848	0.224171	-0.898229	-0.334346	-1.67532	0.364633	0.496542	-0.456609	0.514899	-0.500306	-1.31533	0.448162	0.325211	-0.0649343	-0.12774	-0.332652	-0.355761	0.746626	-0.205817	-0.440966	-0.0608923	-0.462962	-0.453461	-0.0888848	-0.181333	-0.0169049	0.333516	0.00832501	0.182576	-0.362089	0.188384	-0.0869741	0.0959124	-0.367117	-0.0294293	-0.0176363	-0.459878	-0.243988
RVBD_3748	Rv3748	mod12	TRUE	FALSE	FALSE	FALSE	-0.0565192	-0.246695	-0.422816	-0.711216	-0.0376202	-0.776978	-0.142075	0.552348	-0.764555	-0.268788	0.455354	0.38635	0.326656	-0.242216	-0.144951	-1.22778	-3.656	-0.076173	0.106824	-0.494511	0.269787	0.624613	-0.946287	-0.932753	0.307043	-0.131554	0.370411	0.420335	-0.776978	-0.297671	0.0128267	-0.236996	-0.0213905	-0.619975	0.339579	-1.06564	-4.00355	-0.153547	-0.102351	0.0844791	-0.0333533	-0.102481	-0.434508
RVBD_3201c	Rv3201c	-	FALSE	FALSE	FALSE	FALSE	0.332912	0.198537	0.409481	0.865918	0.466227	0.214511	0.231976	-0.669543	0.310271	-0.238741	0.345747	0.370766	-0.218839	0.152293	0.167853	0.724211	-0.365612	0.266599	0.560233	0.436762	-0.0422517	0.128081	0.0848058	0.062783	0.417057	0.191813	0.261011	0.246127	0.214511	0.260911	0.275602	0.142181	0.483096	-0.244635	0.398253	-0.551699	0.132787	0.288119	0.222581	0.270762	0.207162	0.1281	0.227207
RVBD_0622	Rv0622	-	FALSE	FALSE	FALSE	FALSE	-0.580117	0.352245	0.496901	1.01163	0.252087	0.850939	0.727716	0.327534	0.761498	-0.0804203	0.580944	0.706763	0.906001	-1.58398	-0.375943	0.668863	0.94671	-0.240264	0.235535	0.0141716	0.406987	0.0180756	0.892403	0.444346	0.168957	1.20408	0.0934254	0.265231	0.850939	0.914124	0.240219	0.63486	0.439172	-2.39851	0.0384592	0.366966	-0.451297	0.361904	0.288464	-0.14716	0.171671	0.165697	0.391874
RVBD_1005c	pabB	-	FALSE	FALSE	FALSE	FALSE	-0.350491	-0.322549	-0.161323	-1.61765	0.0840032	0.111129	-0.179944	0.344231	-0.188984	-0.363562	0.483039	-0.343091	-0.920007	-0.388305	-0.396972	-0.388301	0.550338	-0.46053	0.0852072	-0.766565	-0.506794	-0.560303	-0.250958	-1.08951	-1.05462	-0.669283	-0.465375	-0.643964	0.111129	0.202951	0.437248	0.0949658	-0.221269	-1.4849	-1.0042	-0.418767	-0.626463	-0.40356	0.0450826	-0.536599	-0.944701	-0.619411	-0.523707
RVBD_3467	Rv3467	-	FALSE	FALSE	FALSE	FALSE	0.417324	0.29697	0.382425	0.0303434	0.483194	0.244073	0.0432538	-0.301734	0.522559	0.124446	0.28334	0.0803584	-0.258613	0.0224537	-0.429621	0.191825	-0.174913	0.0146871	0.271869	0.0495078	0.261933	0.39058	0.191829	0.115538	0.346426	0.0610245	0.378744	0.496301	0.244073	0.673379	0.0406693	0.00338619	0.454891	0.57479	0.540619	0.0979912	0.611581	0.256533	0.493728	0.479342	0.442151	0.343357	0.392529
RVBD_1682	Rv1682	-	F	F	F	F	-0.75885	0.00295141	-0.35407	0.466028	-0.283156	-0.0358907	0.175102	-0.0807104	-0.0493185	-4.29533	-0.37198	-0.141233	0.0398791	-0.108937	0.48711	0.910186	-0.249074	-0.408682	0.278767	0.287523	-0.228291	-0.123841	-0.113137	0.0870115	0.332853	-0.432945	-0.301491	0.136926	-0.0358907	0.716243	0.211103	0.175062	-0.00216778	0.313902	0.605039	0.115629	0.244558	0.182445	-0.167556	-0.121862	-0.370741	0.263552	-0.296134
RVBD_2948c	fadD22	-	FALSE	FALSE	FALSE	FALSE	0.0217115	-0.00403975	-0.216351	-0.35286	-0.200007	-0.126473	-0.169344	0.0625346	0.024438	0.0739768	-0.219837	-0.131258	0.0290717	-0.285931	-0.452008	0.0559913	-0.297979	-0.204859	-0.388106	-0.129459	-0.155761	-0.0464715	-0.064071	-0.0321152	0.0188005	-0.246538	-0.14106	-0.293824	-0.126473	-0.394998	-0.24595	-0.249963	-0.254617	-0.439316	-0.030599	0.157424	-0.148143	-0.018535	0.114862	-0.0469229	0.149137	-0.220009	-0.0992698
RVBD_1582c	Rv1582c	-	FALSE	FALSE	FALSE	FALSE	-0.0957583	0.259465	0.227585	-0.183091	-1.45162	0.0782503	0.443082	-0.688118	-0.546033	0.148714	0.51276	0.741917	0.0323793	0.246725	-0.349686	-0.692443	-0.580879	0.136601	0.0984479	-0.553824	-0.207052	0.0549045	-0.598401	-1.11582	-0.140167	-0.349252	-0.00430889	0.247848	0.0782503	0.50286	0.0166932	0.470491	0.0999582	-0.839278	0.323949	0.528033	0.439287	0.00957735	0.221329	-0.0945351	-0.041752	-0.0475729	-0.154403
RVBD_2382c	mbtC	mod04	TRUE	FALSE	FALSE	FALSE	-0.991036	-0.178859	-0.133347	-2.45685	-6.76229	0.968401	0.923163	-0.225432	-2.10224	-6.78129	-1.15505	-0.168329	-2.87263	-2.83063	-7.77684	-6.76456	-3.77969	-3.11545	0.509014	0.341179	1.02706	1.815	-2.94699	-1.58871	0.431221	0.566269	0.060308	-0.148941	0.968401	0.149833	0.106939	0.152754	-1.3124	-1.15066	-0.0958661	-3.30509	-2.49259	1.23356	1.73096	1.75634	1.17729	-0.578361	0.184994
RVBD_2383c	mbtB	mod04	TRUE	FALSE	FALSE	FALSE	-0.881763	0.0188905	-0.330279	-1.61849	-2.06918	0.200765	-1.26694	0.246055	-1.74559	-3.41026	-0.481351	-0.0632554	-3.04658	-5.38632	-4.27021	-4.48211	-5.2053	-5.81938	-1.10017	0.96899	0.343142	1.56953	-0.707431	-2.04121	-0.199887	-0.723767	-0.3567	-0.711647	0.200765	-1.61868	-0.750498	-0.630765	-0.661747	-2.16816	-1.04079	-1.20116	-2.89747	0.60422	1.2756	1.25562	1.53383	-0.0825456	0.418628
RVBD_2278	Rv2278	-	FALSE	FALSE	FALSE	FALSE	0.144312	0.325598	0.286045	0.282438	0.466079	0.369617	0.322895	0.625695	0.010456	0.345856	0.623855	0.200072	0.26282	0.247324	-0.468577	-0.0272914	0.542409	0.218163	0.710258	0.0386313	0.159378	0.0914285	-0.0673361	0.0582439	0.30452	0.342738	0.175595	0.73021	0.369617	0.859829	0.587601	0.622766	0.206552	0.690798	0.320898	0.450978	0.169807	0.340306	0.381584	0.108258	0.297635	0.241782	0.144282
RVBD_2282c	Rv2282c	-	FALSE	FALSE	FALSE	FALSE	0.138392	0.283433	-0.114963	0.833376	-0.787639	0.531523	-0.596978	0.144489	-0.132146	-1.28353	-0.467223	0.132491	-0.268512	0.26658	-0.32464	1.23043	0.0844163	-0.408122	-0.380485	0.513416	-0.127347	-0.258	-0.346654	0.757835	0.145586	0.583263	-0.0100382	-0.206529	0.531523	0.142074	0.0662985	0.00260199	-0.227724	0.605683	-0.276166	0.109605	-0.0312225	0.182275	-0.33212	-0.297007	-0.0224574	-0.0265633	0.065412
RVBD_1730c	Rv1730c	-	FALSE	FALSE	FALSE	FALSE	-0.153412	0.290982	0.350016	0.285555	-0.264177	0.46066	-0.00310246	0.170043	-0.480713	-1.31415	-0.507947	-0.533621	-0.0414621	-0.391026	-1.23258	0.474623	-0.831734	-0.437848	0.270309	-0.239877	0.186793	0.25544	0.0960781	0.0219642	0.37516	0.0582026	-0.015545	-0.304809	0.46066	0.240346	-0.374437	-0.148661	-0.252792	-0.703732	0.099043	-0.178707	-0.137739	0.235697	0.0285223	-0.172137	-0.254537	-0.101437	0.0914576
RVBD_1994c	cmtR	-	FALSE	FALSE	FALSE	FALSE	-0.100518	-0.0690249	1.0318	0.41137	-1.11338	-0.30008	-0.599643	-0.996275	-1.40859	0.573813	0.755601	-0.0650596	0.514813	-0.906384	-1.40987	0.902957	1.16279	-0.0524241	-0.579754	0.643638	0.243518	-0.673397	0.415348	-1.13835	0.432023	-0.948272	-0.109471	-0.946757	-0.30008	-2.41336	-0.548096	-1.68544	0.324421	-2.65317	0.496153	0.31381	0.0745398	0.126374	0.525643	0.332391	0.423176	-0.43594	0.365378
RVBD_3381c	Rv3381c	-	FALSE	FALSE	FALSE	FALSE	0.567095	0.195288	0.157281	0.353693	0.321268	0.290443	0.411622	0.808965	-0.204179	0.186901	0.596734	0.22623	0.278044	0.215145	0.0726563	-0.0834516	0.367223	-0.0217631	0.542663	0.211995	0.169029	0.388923	0.0016485	-0.0160077	0.461068	0.368249	0.313946	0.577703	0.290443	0.705651	0.495082	0.37732	0.314417	0.287658	0.154673	0.483071	0.584586	0.393402	0.33881	0.199876	0.390977	0.211649	0.230485
RVBD_1164	narI	-	FALSE	FALSE	FALSE	FALSE	-0.0543434	0.314156	-0.168925	-0.760316	-0.23848	-0.0852051	-0.120726	-0.428842	0.134369	-0.385417	0.325768	-0.0787802	-0.138883	-0.487869	-0.84977	-0.316206	-0.152217	-0.118747	0.334956	-0.21229	-0.130581	-0.0915067	-0.225624	-0.374709	0.0737679	0.081477	0.108292	0.0654921	-0.0852051	-0.347415	-0.0112738	-0.099628	0.0192601	0.580352	0.169674	0.228444	-0.344452	0.0901839	-0.0617277	-0.104774	-0.0871046	-0.136877	-0.247824
RVBD_2418c	Rv2418c	-	FALSE	FALSE	FALSE	FALSE	-1.03013	-1.36039	-3.19767	-8.9639	-7.94477	-1.71375	-1.4884	-0.429359	-3.29872	-7.96323	-1.87251	-0.761474	-1.08899	-0.961441	-0.7997	1.14767	-1.90016	-1.46019	-3.30864	-1.14581	-0.023626	-0.223069	-0.409846	-1.68293	-0.379436	-0.396624	-1.98452	-1.47188	-1.71375	-1.22797	-1.08659	-2.49557	-1.43224	-2.33345	-0.986664	-1.66357	-1.38363	-1.97592	-3.16416	-0.965991	-1.2634	-0.751657	-1.57337
RVBD_2517c	Rv2517c	-	FALSE	FALSE	FALSE	FALSE	-0.113188	0.107196	0.148895	-0.218937	-0.038447	-0.319344	0.148258	-0.872758	-0.445716	0.216639	-0.475658	-0.328951	-0.0678187	-0.149378	0.000325	-0.333949	-0.400506	-0.160668	0.149681	-0.532306	-0.061856	-0.290119	0.294924	-0.280179	0.20077	0.00616943	0.236915	0.360557	-0.319344	-0.149462	0.0585721	-0.472681	-0.0221108	-0.862111	0.198456	-0.448691	-0.494632	-0.0774504	-0.158458	-0.0913733	0.138197	-0.355949	-0.0466685
RVBD_1109c	Rv1109c	-	TRUE	FALSE	FALSE	FALSE	-0.170827	-0.845179	-0.79556	-0.815581	-1.83829	-1.52819	-0.15247	-1.76273	-1.19563	-2.01014	-0.502494	-0.643394	-0.601897	-0.183759	-1.49298	0.064148	0.238895	-0.930631	-1.44487	-0.698088	-0.36136	-0.570807	-0.598412	-0.315243	-0.438169	-0.981093	-0.961443	-0.546372	-1.52819	-1.87771	-0.692997	-0.751334	-1.0464	-0.404808	-1.01358	-1.08321	-0.389448	-0.762484	-1.1328	-0.891315	-1.19152	-1.10698	-0.793256
RVBD_0094c	Rv0094c	-	FALSE	FALSE	FALSE	FALSE	0.349748	0.127899	0.287509	0.0825212	0.487895	0.174438	0.0182783	-0.187752	-0.206732	0.0845812	0.256835	-0.0864879	-0.262695	-0.0292236	-0.379963	0.330738	-0.232577	-0.11484	0.248581	-0.162256	0.332676	0.298043	0.166819	0.400367	0.303125	-0.0141731	0.297181	0.438774	0.174438	0.490857	-0.0511863	0.0260774	0.402408	0.724808	0.306233	0.0326216	0.332369	0.249616	0.477355	0.393904	0.401286	0.261509	0.383566
RVBD_1041c	Rv1041c	-	FALSE	FALSE	FALSE	FALSE	0.0486434	0.382557	0.24501	0.178753	-0.110887	0.0561764	-0.199517	0.0407823	0.0483281	-0.22493	-0.247115	-0.0179813	0.33282	-0.217542	0.340366	0.41296	0.259927	-0.00467347	0.0708331	0.16398	0.0609466	0.0289455	-0.289339	-0.00583598	0.0178921	0.218083	0.0988803	0.104361	0.0561764	0.353618	-0.0395795	-0.150013	-0.0219171	0.519591	-0.155213	0.237812	0.206294	0.209192	0.129915	0.2012	0.121202	0.0932817	0.0560889
RVBD_1099c	glpX	mod12	TRUE	FALSE	TRUE	FALSE	-0.138752	-0.423513	-1.42478	-2.91744	-2.16573	-2.61826	-0.141931	0.909608	0.469934	-1.10057	-0.875652	0.428486	-0.553554	-8.42046	-4.29571	-7.41372	-2.66519	1.65273	-8.42167	-8.41362	0.500353	-4.16844	-4.89528	-8.40148	-4.49547	-2.24702	-2.14883	-2.29033	-2.61826	-3.08492	-1.92679	-3.47302	-3.43942	0.710722	-0.104964	-2.53654	-4.09788	-2.01993	-0.802786	-1.38152	-2.18613	-0.851349	-2.11072
RVBD_3236c	Rv3236c	-	F	F	F	F	-0.267848	0.0265195	-0.379477	-0.217122	-0.521022	-0.302461	-0.337544	-0.402814	-0.39268	-0.880176	-0.3311	-0.240567	-0.021868	0.0331689	-0.332025	-0.562072	0.171075	-0.114262	-0.060332	0.16194	-0.332017	-0.248432	-0.476464	-0.29715	0.172625	-0.258514	-0.165234	-0.223486	-0.302461	0.106141	-0.269502	-0.387526	-0.344555	-0.785877	0.0639308	-0.463323	-0.360279	-0.169975	-0.252077	0.0440313	-0.0269073	-0.391429	-0.197461
RVBD_3689	Rv3689	mod13	FALSE	FALSE	FALSE	FALSE	0.261233	0.0955989	0.203032	-0.33638	0.16759	0.586814	0.527264	-0.31573	0.379577	0.500107	0.244405	0.399041	0.115185	-0.103984	-0.0659385	0.38467	0.0197607	0.319931	0.233415	0.280353	-0.0376486	-0.112122	-0.0382894	0.000489553	-0.05352	0.102044	0.30629	0.26606	0.586814	0.632724	0.423025	0.643517	0.244903	0.0249746	0.101084	-0.0111554	-0.0659108	0.664538	0.723223	0.672245	0.72394	0.384745	0.332619
RVBD_3167c	Rv3167c	-	TRUE	FALSE	FALSE	FALSE	-0.198344	-0.70582	-0.0819431	0.134471	-1.15494	-0.0425213	-0.910319	0.468956	0.948952	-1.41259	-0.628798	-0.344199	-0.0725631	-0.0341959	0.152981	-9.69002	-1.06054	-0.992823	0.118659	-0.328084	-0.307024	0.145363	0.072321	-0.540862	0.0423264	-0.0617275	-0.0534558	-0.420097	-0.0425213	-0.252713	-0.873578	0.477058	-0.192414	1.13513	0.932023	-0.601401	-1.95412	-0.142356	-0.1463	-0.225288	-0.0329051	-0.48725	-0.15234
RVBD_0013	trpG	-	FALSE	FALSE	FALSE	FALSE	-0.706082	0.198576	0.104818	-5.33391	-4.32155	-5.33169	1.07284	-5.34338	-5.31885	-4.33467	1.82258	1.42585	-1.89227	-5.33407	-0.249846	2.29264	-5.33501	1.41502	0.677741	-5.33142	0.245583	1.8363	-1.82091	-5.31492	2.19963	1.04654	-5.32369	-5.33842	-5.33169	-4.3242	1.25046	2.64385	-0.822215	-4.30989	1.34381	2.70996	2.68778	1.51746	1.11356	1.19375	-5.3271	-2.07638	0.59058
RVBD_3093c	Rv3093c	-	FALSE	FALSE	FALSE	FALSE	-0.225124	-0.347663	0.0247281	0.0817541	0.102934	-0.149189	-0.561313	0.138829	-0.16591	0.102363	-0.383673	-0.177127	-0.453573	0.176373	-0.412016	0.201179	-0.427187	0.140166	-0.256375	0.143307	0.0234801	-0.0260668	-0.145478	0.139665	-0.246921	-0.112198	-0.185586	0.21592	-0.149189	0.131535	-0.0116783	0.0665245	-0.040706	-0.486503	-0.266749	-0.59005	-0.148417	0.0213624	0.0117903	-0.0907896	-0.0163041	0.0778074	-0.0427555
RVBD_0247c	Rv0247c	mod10	TRUE	TRUE	FALSE	FALSE	-2.38253	-3.24897	-3.46859	-3.47426	-7.96306	-1.17976	-0.0576094	-8.98156	-8.96743	-7.98016	-0.877383	0.19673	-2.98584	-1.03164	-4.85326	0.104212	-8.98008	-2.259	-4.1832	-1.67007	-1.50976	-1.71553	-4.70192	-0.68319	-1.12247	-1.47412	-4.43887	-1.82313	-1.17976	-1.88431	-0.818421	1.05841	-0.918256	-7.96346	-2.29365	-0.420841	0.209884	-0.0676298	-1.39706	-1.71189	-2.2425	-2.80681	-2.93177
RVBD_3890c	esxC	-	FALSE	FALSE	FALSE	FALSE	0.0154127	-0.0893306	-0.689433	-0.520372	0.320234	0.229114	0.0992156	-0.908202	-0.236337	-1.1185	0.478407	0.432096	0.0760786	-0.109895	0.00629103	0.00988662	-0.148266	-0.24383	0.128448	-0.053834	0.204399	-0.513838	-0.529528	-0.256725	0.0303458	-0.322644	-0.234957	-0.283965	0.229114	0.423212	-0.0939713	-0.068329	0.136401	-1.40242	0.325858	-0.332098	0.32299	-0.211563	-0.189799	-0.107179	-0.111206	0.216146	-0.257156
RVBD_0114	gmhB	mod10	TRUE	FALSE	FALSE	FALSE	-0.159919	0.249872	0.417498	-0.1434	0.0823297	0.150157	0.26302	0.22685	0.873192	-2.50347	0.417214	0.484114	0.415907	-0.333917	-0.412405	-2.38385	-0.495147	0.342699	0.227703	0.0246752	0.0738276	-0.0364921	-0.00457951	0.34504	0.0743732	0.302547	0.309993	-0.233183	0.150157	-0.0246261	0.0446296	-0.455505	0.18997	-0.434763	-0.757304	0.0775406	-0.031103	-0.123497	0.347058	-0.0494744	0.225712	0.28798	0.240979
RVBD_2529	Rv2529	-	F	F	F	F	0.0585477	0.0822508	0.170325	0.820715	-0.109881	0.366214	0.353295	0.0477078	-0.343259	0.813019	0.451807	0.196603	-0.475744	0.0777578	0.134708	0.206543	0.500019	-0.0960994	0.525989	0.348531	0.0659324	-0.300331	0.252537	-0.355236	-0.193483	0.085448	0.496661	-0.00699249	0.366214	0.181109	0.552066	1.1542	0.520028	-0.344527	-0.166715	0.0445765	-1.74532	0.0185975	0.087707	0.144685	0.225483	0.113303	0.184403
RVBD_1920	Rv1920	-	FALSE	FALSE	FALSE	FALSE	-0.0149933	-0.194373	-0.172754	-0.220501	-0.521318	-0.0276331	0.241659	0.0370816	-0.217003	-1.30898	-0.429926	-0.397759	-0.174522	0.245925	-0.65586	-0.199515	0.329646	0.202889	0.170515	-0.349186	-0.0562182	-0.436625	0.150686	-0.0396231	0.381701	0.0124544	-0.0956912	-0.125018	-0.0276331	-0.409112	0.249153	-0.249228	0.0361329	0.246242	0.286831	-0.405935	0.00885875	0.35422	-0.0100547	-0.22676	-0.0640719	-0.0142756	-0.273317
RVBD_0502	Rv0502	mod13	F	F	F	F	-0.211899	0.591762	0.36104	1.2476	0.871182	-0.524945	0.481867	0.521588	0.806776	-1.18543	0.378477	0.238978	0.442139	0.382707	0.454074	-0.354501	0.229704	-1.26598	0.407251	0.347877	0.582367	0.447748	0.843202	0.179505	0.584236	0.333639	0.112942	-0.163933	-0.524945	-0.801133	0.172543	-0.0257886	0.372584	-0.282443	0.672117	0.314055	0.6756	-0.214297	-0.587596	0.271359	0.0529806	0.21889	0.169238
RVBD_3319	sdhB	-	F	F	F	F	-0.25694	-0.576628	-1.21366	-1.06825	-0.362244	-0.590693	-0.906109	-0.254652	-0.549844	0.140014	-0.660481	-0.414987	-0.835314	-0.946557	-1.02562	0.123679	-0.119963	0.0530448	-0.499561	-0.681525	-1.12481	-0.534813	-0.895678	-1.55036	-0.646194	-0.794651	-0.747115	-0.553179	-0.590693	-0.767909	-0.618155	-0.185673	-0.634351	-0.274095	-2.13242	-0.793637	-0.581383	-0.25876	-0.0257794	-0.271863	-0.374124	-0.720065	-0.87517
RVBD_3843c	Rv3843c	-	FALSE	FALSE	FALSE	FALSE	-0.797389	-1.15565	-0.74561	-0.590393	-3.00461	-0.722706	-0.624148	-0.726248	0.0432282	0.255061	-0.785668	-1.01064	-0.201504	-0.526496	-1.04966	-0.112966	0.160683	0.324321	-0.733719	-0.841296	-0.505378	-1.04597	-0.488564	-1.06191	-0.895695	-0.758177	-0.336037	-0.60035	-0.722706	-2.86991	-0.0752534	0.52137	-0.478304	-1.04647	-0.335148	-0.392065	-2.16325	-0.926358	-0.694456	-0.930101	-1.04484	-1.09744	-0.489048
RVBD_2118c	Rv2118c	-	FALSE	FALSE	FALSE	FALSE	0.0589967	0.186404	0.403188	0.26343	0.362816	0.654161	0.00184157	-0.317513	0.218311	0.871568	0.231998	0.276058	-0.126114	-0.046101	0.0370378	0.535851	0.78204	-0.111834	0.362239	-0.0629016	-0.0722317	0.325385	-0.177658	0.65385	0.336683	-0.0132729	0.43347	0.181717	0.654161	0.0526687	0.258496	0.445002	0.207638	0.311535	0.102897	0.174461	0.114743	0.419826	0.519936	0.449576	0.653456	0.325555	0.458318
RVBD_2402	Rv2402	-	FALSE	FALSE	FALSE	FALSE	0.0872502	0.274806	0.209102	-0.362953	0.260295	0.186262	-0.073879	-0.00483978	0.252754	-0.196926	0.272787	0.156129	0.121875	0.211814	-0.162266	0.159094	0.415199	0.0880598	0.240357	0.0236187	0.0829906	0.184411	0.145602	0.0447838	0.29192	0.00859959	0.141359	0.0620555	0.186262	0.281878	0.211556	0.291603	0.196478	0.324985	0.0169298	0.0288981	0.177815	0.313813	0.283288	0.212285	0.288973	0.210822	0.248468
RVBD_0563	htpX	-	FALSE	FALSE	FALSE	FALSE	0.85964	0.0215253	1.2211	0.598951	-0.239514	1.42007	1.13446	1.59405	0.361744	1.20338	0.913251	1.88989	-0.0567688	0.0424239	-0.897587	0.250765	1.03205	1.7648	1.02596	-0.811398	0.685541	-0.0232742	0.475022	-0.248255	0.700941	0.405834	0.941227	0.6686	1.42007	2.32781	1.3082	0.565947	-0.0974377	0.993979	1.58609	-0.877502	-1.07662	1.8641	1.74212	1.36681	2.01792	1.23469	1.34983
RVBD_3737	Rv3737	-	F	F	F	F	-0.644972	-0.437325	-0.518208	-0.18082	-1.02398	-0.41188	-0.457308	-1.06797	-0.659162	-0.632414	-0.349109	-0.208151	0.0917531	0.103935	-0.692652	-0.124944	-0.525284	-0.556649	-0.685841	-0.81701	-0.415675	-0.466657	-0.635828	-0.420929	-0.34235	-0.461752	-0.398484	-0.433137	-0.41188	-0.805984	-0.646578	-0.303086	-0.43233	0.106833	-0.556149	-0.599996	-0.207136	-0.233742	-0.431698	-0.501072	-0.684687	-0.47141	-0.471295
RVBD_3622c	PE32	-	FALSE	FALSE	FALSE	FALSE	0.182089	-0.00431276	-0.21114	-0.306238	-0.582107	-0.303593	-0.3654	0.586206	-1.20206	-0.0511029	-0.49657	0.0619541	0.0290566	-0.0771051	-0.287211	-1.08105	0.481966	-1.13806	-0.127831	-0.194674	0.143007	-0.0423245	0.163114	-0.518514	-0.120168	-0.219881	-0.131829	-0.32788	-0.303593	-1.6277	0.0361452	0.372812	-0.33954	-1.34119	0.252596	-0.542981	-0.266218	0.403397	0.0524776	-0.0243979	0.0301648	-0.319194	-0.276958
RVBD_0784	Rv0784	mod04	TRUE	TRUE	FALSE	FALSE	0.220222	-2.08734	-0.169563	1.63802	-0.992296	-0.965042	0.623081	-1.9298	-0.396513	-0.797023	0.876423	-0.113671	-3.1912	-3.70807	0.468353	-2.83699	2.12516	0.528576	-0.0296048	0.440895	0.935697	-2.02335	-0.408317	1.11466	0.222239	-1.72887	-0.101424	1.14464	-0.965042	-3.71069	0.831699	-1.12894	1.33709	0.0196813	0.0926036	-0.962846	0.388658	-0.102758	-0.340342	0.390558	-0.000692962	0.883746	-0.647039
RVBD_2004c	Rv2004c	mod08	TRUE	FALSE	FALSE	FALSE	-0.178292	0.0987071	0.633253	1.1206	0.381772	-1.0132	-0.293804	-0.907958	0.658619	-0.684631	0.480855	0.232456	1.55812	0.823894	2.01518	0.890458	-0.183683	0.707884	0.436173	0.119711	0.47644	-0.181737	0.233668	-0.0618404	-1.46519	-0.00401581	-0.111616	-0.582752	-1.0132	-3.24391	-0.503363	0.938999	0.136047	1.19756	-2.67188	0.0711306	-0.70166	-0.334429	-0.706051	0.262453	-0.271168	0.943163	0.419576
RVBD_1313c	Rv1313c	-	FALSE	FALSE	FALSE	FALSE	0.217425	0.1866	0.290169	-0.108611	0.103656	0.194642	0.076193	0.151616	0.158931	0.486653	0.360224	0.05731	-0.0964763	0.0313379	0.0219969	-0.246846	-0.211158	0.00856279	0.30783	0.346877	-0.0227076	0.209989	0.13594	-0.11773	0.189848	0.333361	0.0949427	0.214593	0.194642	0.496896	0.102581	0.0394526	0.236546	-0.119785	-0.147559	0.113505	0.318319	0.000570865	0.243399	0.0875065	0.109758	0.260909	0.177909
RVBD_1638A	Rv1638A	-	FALSE	FALSE	FALSE	FALSE	-0.508325	-0.278142	-0.0278624	0.84355	0.545506	-0.330252	-0.487682	0.135676	0.621119	1.29986	-0.825012	-1.08166	-2.2754	-0.757003	-0.354594	0.2227	-0.59282	-2.38044	-1.2008	-0.0838241	-0.213347	-0.971928	-0.911513	-0.291223	0.112829	-0.702705	-0.232942	-0.256098	-0.330252	0.151748	-1.05053	-0.480155	0.293556	1.29926	1.1405	0.656709	-2.25838	0.311522	-0.178062	-0.368724	0.0605951	-0.185639	-0.270705
RVBD_1757c	Rv1757c	-	FALSE	FALSE	FALSE	FALSE	0.31538	0.331765	0.270202	0.193487	0.337593	0.193902	0.346259	0.56142	-0.0665268	0.179728	0.525562	0.196954	0.08552	0.25854	-0.0463339	-0.20733	0.202199	0.0519412	0.529425	-0.0896513	0.0967837	0.16215	-0.185883	-0.0782748	0.32827	0.214493	-0.0167932	0.653836	0.193902	0.729648	0.349525	0.336682	0.234573	0.418784	-0.211752	0.335	-0.0774941	-0.189232	0.434186	-0.0892156	0.119244	0.125402	0.0254188
RVBD_2443	dctA	-	FALSE	FALSE	FALSE	FALSE	-0.0990584	0.0960534	-0.1006	-0.16399	0.122695	0.166948	0.0333041	-0.126985	0.0292516	-0.686593	0.244798	0.254941	0.170894	0.18081	0.0692551	0.190135	-0.280409	0.208182	0.289016	-0.0090323	-0.174869	-0.0875773	0.122425	0.17722	0.0984885	0.145531	0.0291668	0.0907768	0.166948	0.111036	0.0713537	0.219307	-0.0603116	-0.245449	0.0979977	0.090597	-0.533819	0.111163	0.076609	0.0749804	0.122898	-0.205246	0.0252848
RVBD_2871	vapB43	-	TRUE	FALSE	FALSE	FALSE	0.41495	2.36998	-0.212577	0.44319	1.09321	-0.303486	-0.74741	0.426511	-0.482228	-7.36115	0.796218	-0.427497	1.51608	-8.35941	-0.139756	1.03771	-4.35945	-2.41113	0.765393	-0.612889	0.534365	1.32711	0.91702	0.250494	0.641663	-1.65269	0.804384	-0.44059	-0.303486	1.42616	0.715108	0.583395	0.292115	-7.34139	-0.00280906	-3.33204	-1.31425	0.146438	-0.468305	-0.165043	-0.0107263	0.783286	-0.321849
RVBD_2898c	Rv2898c	-	FALSE	FALSE	FALSE	FALSE	-0.315524	0.433799	0.504722	-1.22822	0.946685	0.323003	0.907137	0.465629	-3.34314	2.334	-1.8107	-0.261223	-1.98714	-3.12301	-4.32105	-7.43809	-3.88588	-0.914349	1.71059	0.513281	0.339768	-1.26812	0.441078	2.50574	-0.00767311	-0.277185	-1.09303	-1.10603	0.323003	-0.173449	-0.591619	0.444677	0.506614	0.805975	-1.76936	-1.83009	-1.31102	0.689434	0.740296	-0.389906	0.119226	-0.919241	0.23477
RVBD_3333A	-	-	FALSE	FALSE	FALSE	FALSE	-0.709367	0.231862	0.306323	-0.48894	0.347666	0.160693	0.484504	0.184705	0.340489	-0.912121	0.66487	0.245645	0.51126	-0.332583	0.476368	-0.275043	0.200177	0.272188	0.196939	-0.463024	-0.138859	0.206192	-0.789283	0.110725	0.229343	-0.00582633	0.132699	0.0855849	0.160693	-0.728444	0.199183	0.851987	0.0949375	0.0696279	0.186963	0.341101	-1.13303	0.105692	0.284773	0.453091	0.0671332	0.49937	-0.0290561
RVBD_2248	Rv2248	-	FALSE	FALSE	FALSE	FALSE	0.473278	-0.158438	0.00577412	0.126946	-0.543772	0.285576	-0.0338931	-0.280412	-0.670718	0.00183336	0.462208	0.354826	-0.843278	-0.517546	0.313839	1.14983	-0.415335	-1.41026	-0.323955	0.296602	0.306728	-0.435248	-0.117078	0.0875174	0.326747	-0.601396	-0.163912	-0.28212	0.285576	0.102368	0.688155	0.601019	0.255241	-1.06029	0.372657	-1.14558	-0.904132	-0.342475	-0.0464492	0.113143	-0.333561	0.0121513	0.0376787
RVBD_0852	fadD16	mod06	F	F	F	F	-0.189752	0.417998	0.0416915	-0.303544	0.219812	-0.113429	-0.871495	-0.0719099	-0.474434	0.648926	-0.454151	0.0154374	0.57922	0.404638	-0.463521	-1.1615	-2.66381	0.557232	0.255835	-0.302232	0.242379	0.0916796	0.251175	-1.10489	0.0186106	0.275591	-0.196239	-0.3568	-0.113429	-0.244091	-0.423092	0.305303	-0.427874	0.628328	0.217827	-0.468268	-0.105989	-0.164117	-0.256164	0.0123779	-0.0308786	-0.127582	-0.190176
RVBD_1026	Rv1026	mod04	TRUE	FALSE	FALSE	FALSE	-0.16269	0.311249	1.16634	-2.43534	-6.92257	0.408051	0.361391	-0.196973	0.0416062	1.41144	0.858742	0.2847	-2.0617	-1.82678	-3.81401	-2.6585	-3.93694	0.872051	0.51166	1.23633	1.33742	0.858708	-1.34399	0.471801	-0.346052	1.24971	0.346673	0.726478	0.408051	-1.32072	0.124499	-0.842578	0.953005	-1.30536	0.240402	-1.24246	-7.94101	1.6121	1.03045	-0.0470467	0.176281	0.72224	0.453229
RVBD_0042c	Rv0042c	mod20	TRUE	FALSE	FALSE	FALSE	0.118435	-0.159644	-0.886238	1.01692	-0.292522	0.0774466	-0.68362	1.68847	1.28639	1.13209	0.734776	0.512345	0.120355	-0.524537	-4.94205	-8.06003	-1.45375	0.616354	-0.454571	-0.981563	0.681917	0.207926	0.189423	0.0919594	0.54342	-1.10277	-0.487887	-0.340303	0.0774466	0.308549	1.14109	0.23015	0.100457	-0.248158	0.628406	-1.1238	-2.15084	-0.368061	0.165527	-1.48367	-0.211802	-0.33701	0.0672896
RVBD_0045c	Rv0045c	-	TRUE	FALSE	FALSE	FALSE	-0.402881	-0.0256532	0.109884	-0.939882	-0.311386	-0.0983484	-0.1088	-0.43641	0.054065	-0.343632	-0.341696	0.0474692	-0.274677	0.125667	-0.23105	0.355039	-0.488041	-0.177706	0.167058	-0.291544	-0.110161	0.0764824	-0.355351	-0.945018	-0.265641	0.118088	-0.356239	-0.412351	-0.0983484	-0.0860938	-0.328159	0.0340485	-0.367591	-0.285345	-0.161653	-0.449934	-0.0606561	0.147665	0.0582395	-0.13418	0.0209046	-0.342044	-0.164915
RVBD_2458	mmuM	-	FALSE	FALSE	FALSE	FALSE	-0.102206	-0.4869	-0.198892	-0.0861915	0.269437	-0.129895	0.0124935	-0.482017	0.19464	-0.48827	-0.267288	-0.0990132	-0.36767	-0.0640563	0.184163	-0.217142	0.0316348	-0.337206	-0.114929	0.169549	0.0278429	0.128412	0.126645	0.213343	-0.0292387	0.182758	-0.158594	-0.115732	-0.129895	-0.0688788	0.036018	0.187656	-0.0864786	-0.345139	-0.0181761	-0.369058	0.188938	-0.431729	-0.503874	-0.138694	-0.251701	0.00169262	-0.162678
RVBD_3383c	idsB	mod02	TRUE	FALSE	FALSE	FALSE	-0.330804	-0.0861835	-0.0240293	-0.673848	-0.257925	-0.0377216	-0.124354	-1.49493	-0.267716	-0.973707	0.422628	0.415466	-0.202156	0.396383	-0.330166	-0.130292	-1.01529	-0.202273	-0.223317	-1.22038	-0.558288	-0.148827	-0.640766	-0.486454	-0.0542138	0.0263772	-0.167817	-0.620701	-0.0377216	0.0346989	-0.0712033	0.275161	-0.0775019	-0.131434	0.282381	-0.434737	-2.71512	0.205306	0.0742423	-0.00514296	-0.165263	-0.109628	0.0698108
RVBD_3542c	Rv3542c	mod03	TRUE	TRUE	TRUE	TRUE	-5.96005	-5.32948	-4.86696	-4.52777	-4.59204	-4.80241	-1.58534	-1.13018	-4.76677	-9.84635	-0.581761	-0.347338	-5.69827	-7.42132	-3.73314	-9.83929	-10.8439	-2.38819	-10.8489	-6.04581	-10.8424	-6.59374	-10.8561	-10.8261	-5.47593	-10.833	-4.9449	-6.84059	-4.80241	-5.19945	-5.51076	-3.10357	-3.49907	-3.3203	-4.17595	-1.67589	-10.8485	-6.01476	-6.02782	-5.70559	-6.93543	-5.14899	-6.09789
RVBD_1447c	zwf2	mod05	TRUE	FALSE	FALSE	FALSE	-0.519207	-0.629961	-1.2245	-0.274423	-1.8385	0.0630201	-1.59919	0.0645338	-0.879373	-0.635874	-0.392188	0.182849	-0.13947	0.21201	0.499892	0.0493021	-0.623768	0.0715154	-0.692375	-0.484153	-0.321102	-0.853484	-1.145	-1.93185	0.0596083	-0.378541	-0.672744	-0.596347	0.0630201	0.260823	-0.253987	-1.25053	-0.920796	-0.58121	-0.580568	0.129067	-1.10174	-0.0148705	0.265173	-0.189767	-0.737684	-0.212857	-0.650471
RVBD_3575c	Rv3575c	mod05	TRUE	FALSE	TRUE	FALSE	0.101472	-0.362945	0.698041	-0.256296	0.298202	-1.1798	0.333733	0.377054	-0.0977015	0.295147	-0.327753	-0.709015	-0.96011	-1.57266	0.0434458	-1.26541	-0.0545078	0.199651	-0.341322	0.0206015	-0.0070434	-0.545294	-0.270048	0.262919	-0.286666	0.533809	-0.313103	-0.41376	-1.1798	-1.36698	-0.839368	0.407169	-0.141414	0.149728	-0.0860718	0.136961	-0.612024	-0.355189	-0.69468	-0.912507	-0.747312	-0.330573	-0.135019
RVBD_3839	Rv3839	mod05	FALSE	FALSE	FALSE	FALSE	0.451403	0.653731	0.404004	0.87277	0.626144	0.582694	0.526297	0.545392	0.182004	0.179118	0.282071	0.725204	0.236043	0.56684	0.458345	0.326742	-0.0288595	0.176137	0.687238	0.272984	0.479552	0.525363	0.621922	0.665621	0.213336	0.818114	0.402487	0.820892	0.582694	0.174174	0.373977	0.607781	0.604951	0.669872	0.107797	0.395169	0.61623	0.478198	0.102367	0.100821	0.300057	0.427919	0.278868
RVBD_0122	Rv0122	mod06	F	F	F	F	0.754885	-0.153896	0.600287	-0.127264	0.826791	0.687586	1.59026	-1.88617	0.313576	0.503224	0.681837	0.228634	-0.0967645	0.508738	0.130172	-8.57548	0.885147	0.707363	0.658619	0.0496605	0.392409	0.156229	-0.218559	-0.952308	0.732003	-0.558987	0.475012	0.337218	0.687586	1.15767	0.752574	0.543648	0.275703	-0.118443	-0.102008	-0.0854118	-0.507923	-0.318143	0.415284	0.64826	0.281554	0.677032	0.342302
RVBD_3150	nuoF	mod06	TRUE	FALSE	FALSE	FALSE	-0.575331	0.345478	0.62328	-0.327049	-0.162824	0.250809	1.13221	0.065684	0.52858	1.59294	0.448958	-0.0503831	0.296691	-0.0762592	-1.08174	-5.04814	0.279375	0.648936	-0.713547	-0.660896	-0.418811	-0.0833275	-1.4998	-0.330635	-0.147923	-0.860104	-0.10733	-0.261589	0.250809	0.192677	-0.330037	-0.34374	0.0659809	-3.69619	-1.73311	-0.0156182	0.131199	0.0676809	0.289698	0.138793	-0.086234	0.392244	-0.107405
RVBD_0126	treS	mod07	TRUE	FALSE	TRUE	FALSE	-1.08384	-1.56124	-1.03843	0.475155	-0.00301367	-1.33141	-1.30739	-0.614222	0.860822	-1.14884	-1.55158	-1.60881	0.338149	-0.0344298	0.580845	0.764957	-8.46352	-1.53823	-0.370581	0.487682	-1.23576	-2.2838	-1.72889	-0.639039	-0.292488	-1.1165	-1.04998	-0.702761	-1.33141	1.00384	-1.21693	-1.09546	0.0448973	-0.850723	-2.60362	-0.413834	0.937583	-0.152985	-0.0118603	-0.576695	-1.71146	-1.45169	-2.02527
RVBD_3064c	Rv3064c	mod08	TRUE	FALSE	FALSE	FALSE	0.297737	0.352863	0.0237431	-1.29384	-0.273703	-0.144942	0.0782916	0.0959872	-0.00792378	-0.497588	0.313412	0.112856	-0.720993	-0.0315217	0.130975	-1.62383	-0.206295	-0.327908	0.0124117	0.0203053	-0.0198435	0.0168156	0.0172971	0.500237	0.335275	-0.266821	0.323756	0.210139	-0.144942	-0.158483	-0.00427171	0.138912	0.243175	0.611448	-0.0716438	-0.349758	0.075319	0.220431	-0.0853503	0.183521	0.0757142	0.17711	0.184342
RVBD_3446c	Rv3446c	mod08	TRUE	FALSE	FALSE	FALSE	-0.0616923	-0.418067	-0.710089	-1.29357	-0.084734	-0.238913	0.158352	-0.179015	0.779625	-1.00389	-0.304865	0.0664759	0.248766	0.242647	0.100986	-0.124001	0.905535	-0.692435	-0.460061	-0.440327	-0.336948	-0.0264186	0.0219732	-0.0560649	-0.413647	-0.713049	-0.464144	-0.511013	-0.238913	0.159702	-0.0943023	0.0336342	-0.0675091	-1.14103	0.216995	-0.851588	-0.0560779	0.218057	-0.12527	-0.0406594	-0.413448	-0.0112874	-0.323368
RVBD_2171	lppM	mod13	TRUE	FALSE	FALSE	FALSE	-1.42804	-0.285842	-1.30977	-1.13397	-0.314351	-2.09243	-0.797008	0.0595181	-2.73838	-2.58875	-0.424303	-0.763709	0.466314	0.0617585	0.655126	-1.12471	0.00281762	-0.550253	-0.144351	-0.32088	-0.506146	0.140712	-1.05353	-0.604372	0.246307	0.180309	-0.845732	-0.650599	-2.09243	-2.93427	-0.427597	-0.338827	-0.729602	-0.710712	-0.337023	-0.869182	-2.8422	-1.43651	-2.31073	-0.67884	-1.95184	-1.00112	-2.1695
RVBD_0142	Rv0142	mod17	TRUE	FALSE	FALSE	FALSE	0.892694	-0.0481414	-0.0478664	-0.718727	1.62057	0.719891	0.895961	-0.0446828	0.438748	0.300722	0.545564	0.402108	0.0915358	2.05857e-05	0.185218	-0.499848	0.126153	0.768508	0.506196	0.41817	-0.0235965	0.122898	-0.561351	-1.77942	-0.77873	0.0731078	-0.212902	-0.420684	0.719891	1.19587	0.692872	0.320917	0.481207	0.137711	-2.00227	-0.13471	-0.514641	-0.00806369	-0.024461	0.213634	0.635564	0.551537	0.11457
RVBD_3040c	Rv3040c	mod18	TRUE	FALSE	FALSE	FALSE	0.0539626	0.28103	0.699285	-0.502208	0.0782859	-0.590505	0.442447	-0.236912	0.894143	-8.65373	0.711909	0.120857	-0.615286	-0.51827	-0.830637	0.894474	1.54958	-1.54362	0.183815	0.46951	0.474712	0.038659	0.292453	-0.728574	-0.49163	-0.141957	0.284942	0.33927	-0.590505	0.196397	-1.00317	-0.297392	0.152004	-8.63524	-1.62567	-0.146407	-2.59017	-0.31997	-0.371513	-0.179774	-0.129458	-0.214621	-0.435379
RVBD_0219	Rv0219	mod20	TRUE	FALSE	FALSE	FALSE	-0.326032	-0.638084	-0.00375551	-0.830874	-1.16572	0.297696	-0.124805	0.264001	0.281893	-1.54801	-0.369599	-0.036657	0.116299	0.194896	-0.344392	0.00435702	-0.213493	0.103562	-0.2798	-0.514852	-0.0665146	-0.0350524	-0.429281	-0.51901	-0.386245	-0.338096	-0.0270631	-0.0887243	0.297696	-0.137836	-0.123932	0.249657	-0.0925644	-0.0743498	-1.24526	-0.744005	0.23082	-0.193234	0.120015	0.0462768	-0.055871	-0.213217	-0.15218
RVBD_1780	Rv1780	mod20	TRUE	FALSE	FALSE	FALSE	-0.96728	-0.515825	-0.939088	-0.173997	0.037075	-1.2371	0.718974	-0.874416	0.240878	-1.81858	0.381893	0.474464	0.158688	0.94555	0.332996	-0.720014	-0.846858	-0.63215	-0.541382	-0.322747	-0.669484	-0.318623	-0.00508266	-0.606809	-0.732012	-0.141102	-1.13456	-0.723843	-1.2371	-0.65064	-0.753312	-0.510791	-0.257167	0.121935	-0.507843	-1.08019	-0.165648	-1.13236	-1.89175	-1.09755	-1.64819	-0.589567	-1.27032
RVBD_0372c	Rv0372c	-	FALSE	FALSE	FALSE	FALSE	0.284955	0.239004	0.384475	0.453272	-0.451288	0.706867	0.589036	0.890512	-1.57773	-8.22135	0.706917	0.626028	0.200568	-3.06107	-0.408195	1.55476	-3.287	-1.45141	0.0699589	0.0907065	0.269495	0.032966	0.797983	0.692357	0.139042	0.892525	-0.323887	0.379203	0.706867	0.435836	0.793532	0.63204	0.250049	-0.85598	-0.194084	-0.90522	-4.89997	-0.316652	-0.000120233	0.221906	-0.477294	-0.238483	0.0497381
RVBD_0458	Rv0458	-	FALSE	FALSE	FALSE	FALSE	0.265438	-0.0816868	-0.236018	-0.312553	-0.0332241	-0.0613637	-0.096333	0.246044	-0.255458	-0.225343	-0.222644	-0.384859	0.174518	0.12826	-0.0513115	-0.622906	-0.0597373	0.210217	-0.0222415	-0.168255	-0.169384	-0.0284055	-0.213415	0.218792	0.0417482	-0.219704	-0.0633336	-0.335456	-0.0613637	0.0910743	-0.185298	0.0841759	-0.00783109	-0.166625	-0.577225	-0.185996	0.0647186	-0.040146	0.045827	0.0339365	-0.0773478	0.0874972	-0.0783424
RVBD_0735	sigL	-	TRUE	FALSE	FALSE	FALSE	-0.482661	-0.128981	-0.309559	-0.122901	0.126092	-0.0587599	-0.273653	-0.241025	0.0102089	-0.223192	-0.257003	-0.029698	-0.0371925	-0.197121	0.014268	-0.970081	0.187436	-0.796943	-0.264428	-0.619462	-0.453063	-0.0328331	-0.0137219	0.436018	-0.227021	-0.339966	-0.0900562	0.0666573	-0.0587599	-0.106158	-0.190242	-0.383091	-0.117988	-0.271746	-1.13407	-0.56247	0.0984707	-0.123696	0.0258851	-0.0503789	-0.101482	-0.0568062	-0.157366
RVBD_0747	PE_PGRS10	-	F	F	F	F	0.121785	0.0497177	0.251463	-0.424813	0.298224	0.43638	0.126828	-0.606669	-0.590003	0.500039	0.393906	0.00587967	0.305308	0.816404	-0.202126	0.498438	0.740526	0.651772	0.938087	0.0621628	0.439922	0.0782266	0.0806678	0.469148	-0.0866884	0.0307394	0.391829	0.855144	0.43638	0.78263	0.571863	0.365225	0.290514	1.29921	0.421568	-1.19827	0.023053	0.124398	0.378122	0.0340252	0.137786	0.0297771	-0.0989506
RVBD_0889c	citA	-	FALSE	FALSE	FALSE	FALSE	-0.0405519	-0.251122	-0.508174	-0.545852	-0.251095	-0.156513	-0.287687	-0.447747	-0.244193	-0.105335	-0.373911	-0.185026	-0.350514	0.0510239	-0.294738	0.519285	-0.133279	-0.317128	-0.159547	-0.184483	-0.355016	-0.215099	-0.581389	-0.46945	-0.0186122	-0.282114	-0.0796178	-0.192247	-0.156513	0.0355988	-0.0238803	-0.24905	-0.135304	-0.538819	-0.118164	-0.112965	-0.0568411	0.31847	0.224186	0.0553764	-0.00699131	-0.0771162	-0.165732
RVBD_0907	Rv0907	-	FALSE	FALSE	FALSE	FALSE	0.18631	0.171243	-0.0224146	-0.177389	-0.0368604	0.0200247	0.38001	-0.17222	0.0715328	0.444336	0.369716	0.478502	0.382107	-0.28513	-0.835551	-0.323734	-0.135985	-0.163356	0.155832	0.445524	0.179561	0.247847	-0.0716751	0.246112	0.257932	0.459287	0.193313	0.194955	0.0200247	-0.487725	-0.0413922	-0.648062	-0.00417451	0.339211	-0.313862	0.151329	0.193384	0.0797956	-0.217914	-0.0691614	0.112472	0.176834	-0.00824335
RVBD_1090	celA2b	-	F	F	F	F	-0.0566646	0.146682	0.138032	-0.725471	-0.545633	0.0287801	-0.365332	-0.116577	-0.749436	-0.180215	0.201646	0.040466	0.120786	-0.0680629	0.170125	-0.194354	0.314168	-0.0375701	-0.044785	-0.385743	-0.165105	-0.129693	0.146003	0.225634	0.0651493	-0.100247	0.0990932	0.125372	0.0287801	-0.309536	0.0211616	-0.180853	-0.11556	0.401857	-0.558363	-0.0844022	0.201797	0.158065	0.140866	0.0602776	0.082655	-0.167261	0.0219731
RVBD_1410c	Rv1410c	-	FALSE	FALSE	FALSE	FALSE	-0.575886	-0.423856	-0.230807	0.172017	-2.44051	-0.476253	-0.0225622	-1.41932	-0.336328	0.116982	0.87654	0.752839	0.401981	-0.59269	-0.445679	0.770359	0.237566	0.192358	-0.399424	-0.532882	-0.39075	-0.252435	0.292562	0.0428932	-0.422648	-0.115842	-0.211852	0.0520818	-0.476253	-1.01073	-0.378778	-0.515943	-0.320796	-0.196089	-0.110297	-0.667324	-0.359246	-0.281058	-0.473373	-0.657536	-0.226425	0.0815558	-0.348377
RVBD_1411c	lprG	-	F	F	F	F	-6.71788	-7.3044	-6.71243	-6.71218	-5.69585	-2.47315	-6.71545	-6.72109	-6.69601	-5.72164	1.52977	1.08327	-6.73505	-6.719	-6.72416	-5.71103	-6.71771	-6.72186	-6.72195	-6.71066	-6.71774	-6.71874	-6.72518	-6.69875	-6.70673	-6.70338	-6.70818	-6.7201	-2.47315	-2.31314	-6.7157	-5.69993	-6.71281	-5.70191	-6.70439	-6.72115	-6.72148	-6.70559	-6.71063	-6.71718	-6.70705	-4.34072	-4.32479
RVBD_1576c	Rv1576c	-	FALSE	FALSE	FALSE	FALSE	-2.9019	2.28823	-2.91416	-2.92395	-1.90941	6.29477	3.67506	5.62386	-2.91581	-1.91345	2.80986	4.29029	-2.93224	-2.92504	-2.93153	-1.91021	-2.91417	-2.92402	2.85882	0.937294	3.98673	-2.91131	-2.9234	-2.90497	-2.91194	5.34525	1.86247	2.26302	6.29477	2.72927	-2.92476	-1.91168	-2.91765	-1.90135	-2.90538	-2.93186	-2.91773	-2.91129	2.6106	1.86379	2.06932	-2.9167	-2.91641
RVBD_1692	Rv1692	-	TRUE	FALSE	FALSE	FALSE	-0.335999	-0.59054	-1.35768	-0.430941	-0.156968	-1.14254	-0.643499	-0.977412	-0.0906202	-1.50083	-0.538579	-0.015865	-0.100569	0.0668015	-0.299503	-0.917505	-0.353365	-0.686721	-0.102613	-0.0353848	-0.563609	-0.201331	-0.688879	-0.264325	-0.482747	-0.105803	-1.27661	-0.982141	-1.14254	-0.188407	-0.651287	-0.91935	-0.60695	-0.17986	-0.551012	-1.31241	-0.096074	-1.08612	-1.69659	-0.894029	-1.56524	-0.628099	-1.40534
RVBD_1723	Rv1723	-	FALSE	FALSE	FALSE	FALSE	0.0171864	-0.390124	-0.356148	-0.44129	0.159295	-0.368443	-0.411693	-0.629408	-0.00117528	-0.349283	-0.320523	-0.0509854	-0.523042	-0.171712	-0.338475	-0.0379511	-0.205002	-0.0469581	-0.0950899	-0.130664	-0.193227	-0.091406	-0.131531	0.414728	-0.528763	0.0614511	-0.312906	-0.15325	-0.368443	-0.0568579	-0.219089	-0.275201	-0.193695	-0.22076	-0.457127	-0.463742	-0.642392	-0.172664	-0.445305	-0.223179	-0.221673	-0.0994926	-0.361786
RVBD_1777	cyp144	-	FALSE	FALSE	FALSE	FALSE	0.120459	-0.130162	-0.0897204	-0.0978891	-0.426306	0.198586	-0.321912	-0.0729503	-0.220973	-0.024227	0.292891	0.450323	0.300786	-0.403842	-0.429683	-0.444525	0.0220135	-0.491388	-0.00910688	0.140766	-0.146829	0.263279	-0.151466	-0.0333126	0.124728	-0.0541105	-0.0216903	-0.0416828	0.198586	0.137941	-0.0851897	-0.0472263	-0.0923415	-0.253985	-0.0640293	0.0766219	0.108738	0.0530292	-0.114274	-0.176917	-0.0115971	-0.19277	-0.103583
RVBD_1963Ac	-	-	FALSE	FALSE	FALSE	FALSE	-0.816474	-0.0181065	-0.622081	-0.104549	-0.485602	0.273742	0.58788	-2.8401	-2.30241	-8.02995	1.06238	0.177791	0.334359	-3.02457	-0.110317	0.655401	-5.02811	-0.997279	0.0180212	-1.73339	-0.271801	0.43435	-0.861689	-0.537754	0.0968591	-4.08721	0.811793	1.3932	0.273742	0.661055	-1.2749	0.541926	0.0229608	-8.01263	-0.401848	0.194076	0.125509	0.254516	-0.215341	-0.241192	0.408272	0.0179682	0.39163
RVBD_1974	Rv1974	-	FALSE	FALSE	FALSE	FALSE	-0.0623699	-0.0235169	0.228843	-0.675296	-0.173966	-0.00728141	-0.179077	-0.35213	-0.56507	-0.488768	-0.298816	-0.398388	-0.107557	-0.714544	0.0958286	-0.654726	-0.342302	0.21636	-0.242959	0.0106375	-0.11784	0.143326	-0.705853	-0.0908256	0.072596	0.220615	-0.00645004	-0.248936	-0.00728141	-0.318225	-0.021875	-0.348804	-0.0080269	-0.812986	-0.174452	-0.060839	0.204943	-0.0368558	-0.0871089	-0.0429935	0.127946	0.122616	-0.0445269
RVBD_1991Ac	-	-	FALSE	FALSE	FALSE	FALSE	-2.6914	-2.03395	0.667822	1.16623	-6.55851	-2.34277	1.06263	-1.38568	0.309776	-6.57178	1.91997	1.8005	-7.59729	-4.04258	-7.5818	-6.56948	-7.56887	0.148038	-2.05353	-2.20902	0.303085	0.326275	-0.525103	-7.55329	0.320358	0.335999	-0.742686	-0.133165	-2.34277	-2.23927	-7.56892	-1.67043	-0.743273	-6.55209	-7.56796	-2.2754	-7.57659	-4.18213	1.36137	-0.617641	-0.700115	-0.772226	0.499788
RVBD_2041c	Rv2041c	-	FALSE	FALSE	FALSE	FALSE	-0.025973	-0.114197	0.0570275	-0.222594	-0.183271	-0.181692	0.132841	-0.169841	0.622135	0.283784	-0.401428	-0.00991735	-0.0750868	-0.0488185	-0.104455	-0.590079	-0.460133	-0.574514	0.313242	-0.0765035	-0.0849863	0.0265401	0.161773	0.0733661	0.135945	-0.162269	0.21839	0.0270904	-0.181692	-0.0528407	0.10413	-0.41326	-0.0683641	0.576469	-0.0666066	-0.166087	0.544357	0.209985	0.135339	0.198404	0.204953	0.0995413	0.0618909
RVBD_2327	Rv2327	-	TRUE	TRUE	FALSE	FALSE	-0.535915	-1.91598	-0.48048	1.47234	-0.873783	-1.22297	-0.369922	-1.16721	-2.93064	-2.18215	-0.665481	-0.209966	-0.805666	-4.2905	-1.08704	0.609179	-3.97583	-2.08993	-1.34772	-0.795861	-0.717253	-0.921607	-1.06767	-1.41263	-1.39021	-0.337667	-0.206592	-1.22043	-1.22297	-1.23168	-0.190193	0.335228	-0.427753	1.69158	-1.41773	-0.559814	-2.19864	-1.09541	-2.02332	-1.47214	-1.34845	-1.68945	-1.3847
RVBD_2416c	eis	-	FALSE	FALSE	FALSE	FALSE	0.0388208	-0.369928	0.282533	-0.302852	0.271606	-0.0592392	-0.476443	0.177593	0.0960121	-0.689584	-0.413647	0.0670395	0.0015149	-0.348486	0.205637	0.122032	0.228829	0.596684	0.0111918	0.0911313	-0.16398	0.00397495	0.0329442	-0.129975	0.256831	0.0195624	0.174097	0.0954326	-0.0592392	0.432304	-0.0239399	-0.238354	-0.0149964	-0.247714	-0.30574	0.294778	-0.401187	0.12948	-0.455541	-0.121445	0.0744244	0.0170332	0.0305905
RVBD_2446c	Rv2446c	-	FALSE	FALSE	FALSE	FALSE	0.46449	0.179102	-0.0649271	-0.0810815	0.356581	-0.0652405	0.116252	0.659754	0.318627	1.11616	0.491966	-0.0607697	0.0975893	0.0300933	0.253796	-0.218726	-0.429464	-0.028822	0.868383	0.563961	0.504143	-0.13083	0.19695	0.0437475	0.340642	-0.00167488	0.00264234	-0.124221	-0.0652405	0.434151	0.264712	0.388756	0.482666	0.158032	0.975098	0.172809	0.292427	0.361904	0.740089	0.471144	0.401447	0.677367	0.318007
RVBD_2462c	tig	-	FALSE	FALSE	FALSE	FALSE	-0.717009	-1.01035	-0.0212919	-0.524709	0.140646	0.0984324	0.104621	-0.162161	0.191807	-1.74697	-0.426285	-0.364484	-0.482178	-0.548568	0.21871	1.26487	0.0503147	0.564068	-0.479269	-1.05437	-0.411868	-1.14007	-0.474669	-0.0738174	0.294846	-0.0525364	-0.468836	-0.64554	0.0984324	-0.68139	-0.313769	-1.00207	-0.797443	-0.070893	-0.360994	-0.429851	-0.874014	0.0779436	0.522104	0.0429015	0.65663	0.374612	0.354891
RVBD_2508c	Rv2508c	-	F	F	F	F	-0.298594	-0.558519	-0.436506	-0.929391	-0.659188	-0.619033	-0.386155	-0.17544	-0.552092	-0.302323	-0.345999	-0.717063	-0.390082	-0.604513	-0.584121	0.0379176	-0.394074	-0.407857	-0.560841	-0.166322	-0.5808	-0.514382	-0.280361	-0.903436	-0.373334	-0.583455	-0.595558	-0.529137	-0.619033	-0.406748	-0.545009	-0.643957	-0.516493	-0.170376	-0.225316	-0.323653	-1.49639	-0.659825	-0.548545	-0.437468	-0.453803	-0.61869	-0.404922
RVBD_2613c	Rv2613c	-	FALSE	FALSE	FALSE	FALSE	-1.02759	-1.77601	-4.01559	-0.440326	-1.86376	-2.5549	-1.96779	-1.45358	-1.3805	-2.48855	-1.43543	-1.47245	-0.939682	0.237706	-1.22186	-1.4828	-2.9515	-2.35165	-1.28673	-0.761774	-1.0678	-1.21073	-0.872739	-1.49219	-0.742616	-0.595371	-0.943235	-1.1845	-2.5549	-1.78019	-2.49454	0.0614191	-1.01023	-0.0337354	-3.12868	-0.499879	-0.555995	-2.10055	-1.64589	-1.74857	-1.9478	-2.00134	-2.43751
RVBD_2715	Rv2715	-	F	F	F	F	-0.490957	0.183593	-0.293076	-0.786576	-0.347314	-0.212876	-0.155412	-0.275947	-0.0412325	-0.19139	0.263697	0.20708	0.093824	0.151159	0.0719794	0.363393	-0.263232	-0.334969	-0.131251	0.0250037	-0.0432967	-0.0404207	-0.314489	0.33567	0.0281684	-0.747077	0.10471	-0.261703	-0.212876	0.229392	0.026578	0.489111	-0.0496628	-0.0513796	-0.186384	0.245635	0.341751	0.159651	-0.100352	0.156146	0.303886	-0.263365	0.00483879
RVBD_3068c	pgmA	-	TRUE	FALSE	FALSE	FALSE	0.0100634	-0.31808	-0.166719	-0.662204	-0.0756954	-0.232948	-0.290538	-0.258288	0.259582	-0.711044	-0.170881	-0.0731742	-0.267151	-0.221769	0.171571	-0.380322	-0.672664	-0.320566	-0.25421	-0.281558	-0.228538	0.00161792	-0.0428875	0.304312	-0.295219	-0.316265	-0.12023	-0.279168	-0.232948	0.0213698	-0.201769	0.0379163	-0.0431098	-0.342988	-0.174126	-0.249485	0.288936	-0.0693291	-0.295592	-0.0756071	-0.147042	-0.10914	-0.14884
RVBD_3129	Rv3129	-	TRUE	FALSE	FALSE	FALSE	0.335045	-0.516043	-0.128897	-2.46981	-2.01095	-0.372048	-0.150529	-0.72289	0.351047	0.609698	-0.866914	-0.963339	0.403315	-0.267941	0.00828667	0.968468	-1.77743	0.958904	-0.365051	-0.406644	-0.14843	-0.478201	-0.278533	-0.668522	-0.115623	0.589359	-0.154717	-1.27076	-0.372048	-1.93286	0.392378	0.222487	-0.703673	-8.57955	0.682189	-1.03521	-1.85034	0.278724	-0.118693	-0.649103	0.285426	-0.0648695	-0.342168
RVBD_3159c	PPE53	-	FALSE	FALSE	FALSE	FALSE	0.374023	-0.107429	0.171675	-0.167677	0.573151	0.541229	0.502339	-0.369009	0.12534	-0.336682	0.299445	0.382571	0.0805514	0.483019	-0.397723	0.520744	0.0396735	0.549806	0.214303	-0.182704	0.284867	0.323485	0.418296	0.0226135	0.26782	0.342819	0.407116	0.326319	0.541229	0.167355	0.133319	0.120882	0.0935371	0.345631	-0.111868	-0.17647	-0.0252221	0.32541	0.396106	0.158279	0.142766	0.330816	0.178291
RVBD_3186	Rv3186	-	FALSE	FALSE	FALSE	FALSE	-0.0691489	0.00213818	0.499207	0.287156	0.45819	0.167578	0.473634	0.0260488	-1.37578	-1.13986	0.462047	-0.0166591	0.325786	0.1827	0.095586	-0.133584	0.075659	0.0970081	0.571053	0.264959	0.125363	0.2195	-0.0101187	-0.115526	0.276217	0.1888	0.358297	0.615032	0.167578	0.591654	0.378792	0.836019	0.300227	0.665198	0.221803	0.476673	-0.218988	0.2107	0.301963	0.0483418	0.110698	0.0833661	0.130995
RVBD_3313c	add	-	TRUE	FALSE	FALSE	FALSE	-0.316365	-0.211572	-1.02988	-1.29177	-0.374882	-1.5468	-0.348198	-0.153185	-1.38305	-1.92097	-0.709875	-0.868712	-0.190743	-0.296308	-2.71039	-2.42031	-0.520177	-0.702538	0.159942	-0.334159	-0.0523197	-0.386003	-0.00569981	-0.078185	0.284731	-0.0165573	-0.276867	-0.404085	-1.5468	-0.963342	-0.268199	-1.61068	-0.425126	-4.05653	0.445496	-1.20581	-1.62027	-0.361624	-1.01099	-0.409646	-0.758206	-0.792621	-0.707857
RVBD_3361c	Rv3361c	-	FALSE	FALSE	FALSE	FALSE	-0.817608	0.839166	1.26281	-6.80297	-5.78703	0.726236	1.84685	1.75096	-6.79572	-5.79929	1.47281	2.12004	-6.81517	-6.80494	-2.67839	-5.79324	0.869217	1.90282	-0.162	-0.168841	-0.456433	-6.79821	-6.80221	-6.78426	-2.39963	0.0312472	1.63667	-0.0798565	0.726236	-1.15377	0.250066	-1.85722	1.16193	-5.78244	-6.78287	-2.46735	-6.80088	-0.486758	0.518044	0.222405	0.854193	-0.894294	0.314099
RVBD_3482c	Rv3482c	-	FALSE	FALSE	FALSE	FALSE	-0.306203	-0.156732	-0.403444	0.0588865	-0.366067	-0.418434	-0.671038	-0.0597743	-0.27424	-0.291321	-0.376986	-0.171258	0.183473	0.0812951	0.174951	-0.109953	-0.392361	-0.289352	-0.406478	-0.322765	0.043481	-0.073576	-0.0344446	0.100988	-0.0126459	-0.115127	-0.0667215	-0.247708	-0.418434	-0.330916	-0.137526	-0.347648	-0.00537126	0.114038	-0.121284	-0.386643	-0.100309	-0.353271	-0.172063	-0.266467	-0.261273	-0.202911	-0.304604
RVBD_3647c	Rv3647c	-	FALSE	FALSE	FALSE	FALSE	-0.339541	-0.852296	-0.642937	-0.171558	-0.496537	-0.393406	-0.531209	-0.881799	-0.290267	-0.406044	-0.751551	-0.680337	-0.564936	-0.499831	-1.26229	0.974852	-0.54583	0.219188	-0.850449	-0.311526	-0.701175	-0.927842	-0.448645	-0.345167	-0.924952	-0.502131	-0.528489	-0.835286	-0.393406	-0.649787	-0.370807	-0.801528	-0.491845	-0.297516	-1.16143	-0.0295954	-0.44765	-0.277838	-0.210022	-0.569929	-0.464063	-1.04894	-0.507418
RVBD_3698	Rv3698	-	FALSE	FALSE	FALSE	FALSE	-0.151375	0.131316	-0.197683	-0.83202	0.111657	-0.27088	-0.376838	-0.125912	0.106392	-1.14361	0.402651	0.284777	0.192515	0.378091	-0.122923	-0.411918	0.677902	0.101547	-0.342366	-0.425319	-0.259385	-0.213642	-0.260681	-0.385159	-0.323739	-0.210306	-0.122684	0.0420665	-0.27088	0.203286	-0.10972	-0.128725	0.012323	-0.726474	-0.619863	-0.076768	-0.0606487	-0.320866	-0.221502	-0.241625	-0.256945	-0.0068276	-0.377681
RVBD_3866	espG1	-	TRUE	TRUE	FALSE	FALSE	-0.621949	-1.03178	-0.408975	-0.560535	-0.416782	-0.55467	-0.50907	-1.23929	-0.407414	-1.63577	-0.387163	-0.698334	-1.16798	-0.969752	-0.0423198	0.0512962	-1.52166	-1.02897	-0.311239	-0.636234	-0.707251	-0.407164	-0.682877	-0.53741	-1.93459	-0.5379	-0.467644	-0.368696	-0.55467	-1.2249	-0.851843	-1.12926	-0.877669	-0.301131	-1.09117	-0.846962	0.0537416	-0.191187	-0.675988	-0.827418	-0.914997	-0.919151	-0.589164
RVBD_0545c	pitA	mod06	TRUE	FALSE	TRUE	FALSE	-1.47938	-1.04113	-0.599551	-4.15699	-0.98486	-1.39951	-0.62233	-1.20863	-6.09284	-9.22895	-0.572061	-0.0164021	-2.20634	-3.81252	-1.90858	1.55216	-0.293543	-4.52657	-1.44547	-3.04831	-1.19075	-1.51996	-1.78282	-2.94833	-1.42269	-0.911504	-1.90352	-1.79876	-1.39951	-4.1164	-1.31923	-0.302425	-0.818319	-0.415115	-0.66277	-0.644925	-1.19155	-0.280604	-1.87226	-2.35409	-1.3194	-1.18528	-1.02294
RVBD_1674c	Rv1674c	mod07	F	F	F	F	0.058825	0.0591661	-0.0639404	-0.526965	0.264976	-0.22065	-0.0898294	0.695354	0.283924	0.26559	-0.410543	-0.651453	1.1042	0.287363	-0.187194	-0.980172	0.498478	-1.14236	0.271455	0.124463	-0.0227568	-0.059636	-0.0114707	-0.252006	0.255522	-0.141208	-0.344891	0.0967608	-0.22065	-0.340783	0.32408	0.381927	-0.0773957	-1.06764	-0.406138	-0.844266	-0.0971824	0.131235	-0.381995	-0.165989	0.0293367	0.0154489	-0.309135
RVBD_3779	Rv3779	mod09	TRUE	FALSE	TRUE	TRUE	-0.38561	-0.270265	-0.714227	-0.658623	-0.736952	-1.22018	0.102752	-0.15049	0.0624058	0.167047	-0.236967	-0.778039	-1.85648	-1.53083	0.0203626	-0.764524	-1.42764	-0.88874	-0.504512	-1.29431	-0.621636	-1.06491	-0.521318	0.0639428	-0.948049	-0.590646	-0.598306	-0.482942	-1.22018	-1.27936	-0.85828	0.255669	-0.648624	-0.586393	-0.00787764	0.244301	-0.367254	-1.04571	-1.45717	-1.20603	-0.712641	-0.856835	-0.870379
RVBD_1824	Rv1824	mod13	TRUE	FALSE	FALSE	FALSE	-1.88342	-0.113325	-0.852795	-1.11695	-3.66473	-2.81011	-2.32245	-0.0464416	-0.994611	-8.92398	-0.647359	-2.36182	-0.352078	-1.39214	-3.20719	-8.91923	-3.67031	-1.14001	-1.52787	-0.291706	-1.12597	-1.79829	-1.40143	-1.23936	-0.194622	-0.694963	-1.38562	-1.76351	-2.81011	-3.81415	-1.44336	-0.723427	-1.46112	-1.45533	-1.24742	-1.8316	-5.22263	-1.12163	-5.66513	-1.51024	-1.3715	-2.09523	-1.70227
RVBD_0148	Rv0148	-	FALSE	FALSE	FALSE	FALSE	0.442485	-0.035214	0.179141	-0.558784	0.0780518	0.0845454	0.316012	-0.484098	0.234352	0.0317013	0.2803	0.401599	0.0703387	0.301518	0.252338	-0.0402098	-0.618859	0.119074	-0.051971	0.333604	0.0863139	-0.0212994	-0.0457967	0.044999	-0.0795374	0.125337	0.0517644	0.1974	0.0845454	0.133733	0.0652948	0.165009	-0.0343543	-0.237956	0.143539	0.193939	-0.271384	0.227259	0.182907	0.338978	-0.00608234	0.274042	0.028525
RVBD_0198c	zmp1	-	FALSE	FALSE	FALSE	FALSE	-0.190356	0.245714	-0.0511341	0.370674	0.461832	0.347939	0.177333	-0.117706	0.565181	-0.84325	0.331045	0.400352	-0.114022	0.249619	-0.0954404	0.681202	0.17589	-0.2134	-0.229354	-0.111868	0.361588	0.0933782	-0.29618	0.110692	0.251865	0.224587	0.116441	0.0298737	0.347939	-0.0960994	0.23936	0.606099	0.325865	-0.127753	0.39772	-0.28829	0.478939	0.529121	0.616854	0.0573294	0.265949	-0.240698	0.289151
RVBD_0570	nrdZ	-	FALSE	FALSE	FALSE	FALSE	0.167298	-0.180225	-0.0176203	-0.128606	0.036041	-0.0594562	-0.434769	0.033235	-0.118749	-0.135589	-0.263483	-0.37303	-0.352254	0.106734	0.21183	-0.0336687	0.0354042	0.0638149	-0.35785	0.0119426	0.0431312	-0.027249	-0.103589	-0.00808993	0.170779	0.110646	-0.0748456	0.162274	-0.0594562	-0.0263837	-0.127574	-0.164954	-0.0746016	-0.596356	-0.136739	-0.146007	0.158756	-0.0385042	-0.0735975	-0.0988682	-0.0830642	-0.225792	-0.0160607
RVBD_1388	mihF	-	FALSE	FALSE	FALSE	FALSE	-6.70811	-1.19779	-0.1564	-6.71656	-5.69546	-2.43311	-0.559757	-6.71434	0.349298	-5.71108	-1.35424	-0.73334	-1.21489	-6.71096	-2.58961	-1.43336	-6.70998	-1.30473	-1.19122	-0.016783	-3.47259	0.507725	-1.88728	-6.69416	-6.70168	-6.70209	0.538621	-1.84118	-2.43311	-5.70568	-2.1613	-1.76531	-0.967663	-5.69287	-6.70234	-6.71782	-6.71367	-6.69986	-1.16834	-1.97342	-1.50467	-6.7109	-1.25115
RVBD_1763	Rv1763	-	FALSE	FALSE	FALSE	FALSE	0.379825	0.154205	0.456432	0.0468301	0.460123	0.265032	0.154302	0.0488027	-0.487088	-0.22709	0.503412	0.0941318	0.279389	0.0865232	-0.585372	0.134398	0.323637	0.257713	0.652137	-0.0978479	-0.0249884	0.313721	0.0272665	0.417973	0.285007	0.132755	0.333783	0.594792	0.265032	0.822207	0.533207	0.278493	0.283329	1.01754	-0.241555	0.418651	-0.135709	0.28736	0.417139	0.255575	0.323413	0.198341	0.278047
RVBD_1919c	Rv1919c	-	TRUE	FALSE	FALSE	FALSE	-0.682957	-0.77443	-0.625834	-1.38215	-0.39343	-0.580106	-0.0870627	-1.23373	-2.18814	-1.2749	-0.384695	-0.498344	-0.453555	-0.151813	-0.894719	-0.179148	0.125115	-0.866767	-0.0584579	-0.263423	-0.640179	0.0423078	-0.200039	-1.26589	-8.72199e-05	-0.371584	-0.609805	-0.62223	-0.580106	-0.875929	-0.502223	0.370071	0.131833	-0.516903	0.498081	-0.868563	-0.164958	-0.0014165	-0.504844	-0.106588	-0.487927	0.135846	-0.558908
RVBD_2168c	Rv2168c	-	FALSE	FALSE	FALSE	FALSE	0.19053	0.21308	0.339663	0.222279	0.546975	0.418453	0.415368	0.711961	-0.116814	-0.345697	0.58118	0.353808	0.162896	0.400132	-0.455497	-0.157925	0.345652	0.13268	0.644045	0.334444	0.0888068	0.200799	0.269073	0.303943	0.457139	0.190854	0.311342	0.774303	0.418453	0.677379	0.454506	0.393013	0.285134	0.574588	0.59656	0.666229	0.298885	0.121067	0.504085	0.272354	0.444151	0.313856	0.274271
RVBD_2179c	Rv2179c	-	FALSE	FALSE	FALSE	FALSE	-5.28547	-2.55931	-5.28256	-1.69028	0.959971	-1.01405	0.551858	-5.29288	-5.26608	-4.2899	1.25189	1.84095	-1.31971	0.430572	2.22549	-4.27448	1.22199	-5.28657	-1.06065	-1.43483	0.398791	-1.03379	0.766121	-5.26552	-0.419026	-5.25802	-5.27772	-5.28106	-1.01405	-0.872407	-1.43274	-4.26429	-0.128503	-4.27236	-5.26021	-1.75381	1.29328	-5.2727	-5.28164	-5.28492	-5.27556	0.155738	-2.01466
RVBD_2237	Rv2237	-	FALSE	FALSE	FALSE	FALSE	0.173666	-0.164304	-0.227729	-0.52965	-0.367526	-0.342259	0.0769131	0.154025	-0.0685016	-0.122528	-0.355158	-0.157255	-0.140631	0.0211113	0.374742	-0.976807	0.570155	-0.153594	-0.0249115	-0.228318	-0.237179	-0.367578	-0.509113	-0.250601	0.181307	-0.370421	-0.0230671	-0.0347767	-0.342259	-0.544906	-0.394107	-0.154891	-0.0620338	-0.562194	0.251398	-0.224875	-0.537115	0.137648	-0.0274742	0.108078	-0.0613596	-0.128394	-0.136132
RVBD_2515c	Rv2515c	-	F	F	F	F	-0.374598	-0.396221	-0.23699	-0.253546	0.156555	-0.0987933	-0.236234	-0.35832	-0.534008	0.138976	-0.343963	0.0751566	-0.531523	-0.318293	-1.52851	-0.464351	-0.177238	-0.454608	-0.23876	-0.476658	0.174412	0.176317	-0.367534	-0.0304648	0.0872345	-0.150483	-0.290105	-0.299416	-0.0987933	-0.713794	-0.23784	-0.785499	-0.140454	-0.896951	-0.654756	-0.383283	-0.224765	-0.180773	-0.0827809	-0.102561	-0.416829	0.0328786	-0.30278
RVBD_2739c	Rv2739c	-	TRUE	FALSE	FALSE	FALSE	-1.19642	-0.383836	-1.9719	-4.14318	-0.495501	-1.98479	-1.44469	-2.34502	0.213758	-7.6639	-0.680824	-0.0846341	-1.70417	0.427964	-2.38286	-0.789195	0.574723	-1.11721	-1.27511	-0.313395	-0.473713	-0.428408	0.948151	-1.38357	-0.750688	-2.28075	-0.82528	-1.02628	-1.98479	1.77921	-0.916407	-0.800724	-0.142955	-1.13862	-0.304432	-1.18657	-2.07865	-1.48592	-2.28829	-0.638566	-2.0245	-0.558585	-1.08481
RVBD_3911	sigM	-	TRUE	TRUE	FALSE	FALSE	-0.45112	-1.00544	-0.165854	-0.287883	0.303814	0.11048	-0.541237	-0.87175	-0.383729	-0.90767	-0.37682	0.205217	-0.139821	0.162396	-0.18763	-3.69818	-0.0420686	0.122195	0.00623459	-0.458832	-0.195003	-0.178441	-0.123705	-0.774258	-0.155284	-0.105496	-0.215732	-0.343045	0.11048	-0.597007	0.170968	0.228705	-0.224421	0.276558	-0.393536	-1.20756	-0.414426	-0.385493	-0.0762126	-0.306624	-0.305248	0.0463045	-0.103349
RVBD_0324	Rv0324	mod18	TRUE	FALSE	TRUE	FALSE	-2.33988	-1.55183	0.531491	-0.892977	0.578924	-2.85772	-0.738608	-0.22989	1.20523	-7.08186	-0.691266	0.692576	1.03177	-2.19048	-0.312396	-7.07583	-4.08078	-2.56067	0.0256441	0.712066	-0.320021	0.498202	-1.5679	-0.356426	0.192361	0.684779	-0.270784	-0.716523	-2.85772	0.0964978	-0.875138	-0.221358	1.13962	0.526277	-0.410562	-1.01418	-1.2394	0.435423	-1.56297	-0.458214	-2.43827	-0.00235236	-0.640351
RVBD_0250c	Rv0250c	-	FALSE	FALSE	FALSE	FALSE	-0.133114	0.302293	-0.252819	-1.61612	-1.21744	-0.209652	1.31207	0.444501	-0.284922	0.423116	1.23899	0.958954	-3.03133	0.933915	-0.68162	-2.10586	0.0958517	-0.607376	0.693501	0.532868	0.473929	-0.150889	-1.50064	0.0296366	-0.11026	0.788658	-0.595372	-1.40736	-0.209652	0.567767	-0.858417	-1.25084	0.0361341	1.73567	-1.66781	2.24286	-1.49822	0.0218474	-0.630639	-0.212056	0.172049	-0.0353563	-0.349181
RVBD_0537c	Rv0537c	-	TRUE	FALSE	FALSE	FALSE	-0.246112	-0.340941	-0.242262	0.0114322	-0.451084	-0.235952	-0.259049	-0.0554921	0.226522	0.200085	-0.269859	-0.222517	-0.453152	-0.391623	-0.295526	-0.719109	-0.338402	-0.209646	-0.248642	-0.201559	-0.248319	-0.270535	-0.17856	-0.236386	-0.445942	-0.255946	-0.1657	-0.0881496	-0.235952	0.203977	-0.172385	-0.294033	-0.241534	-0.0342425	-0.205649	-0.322829	-0.949854	0.0549392	-0.216594	-0.188168	-0.212338	0.0385072	-0.285324
RVBD_1218c	Rv1218c	-	FALSE	FALSE	FALSE	FALSE	-0.15091	0.193507	-0.0341274	-0.756465	-0.532931	0.49011	0.444976	-0.0464514	0.164642	-0.281726	0.594526	0.243221	-0.753845	-0.446272	-1.97386	-1.01626	-0.331681	-1.16538	0.0763263	0.171791	0.236851	0.612695	-0.790312	-0.873535	-0.225507	-0.588107	0.280638	0.37043	0.49011	0.0683496	0.878611	0.722663	0.559443	-0.0156389	0.415869	0.292876	-0.427119	0.472732	-0.540392	0.0147347	0.200115	-0.023822	-0.15081
RVBD_3661	Rv3661	-	TRUE	FALSE	FALSE	FALSE	-0.791716	-0.574875	-0.903788	-0.298258	-0.128584	-1.09709	-0.820131	0.1046	-0.14777	-1.3156	-0.453184	-0.105362	-0.546935	0.49639	0.431788	-0.540648	-0.0215012	-0.0834851	-0.656716	-0.238781	-0.257745	-0.423987	-0.271399	0.21456	-0.688956	-1.05048	-0.731912	-0.33558	-1.09709	-0.571132	-0.506949	-1.06975	-0.415612	0.464666	-0.811803	-1.58327	-1.47136	-0.790566	-1.16322	-0.511929	-0.979949	-0.272075	-1.1613
RVBD_2933	ppsC	mod08	TRUE	FALSE	FALSE	FALSE	1.57269	0.854102	0.884767	0.699644	0.899582	1.26532	0.995326	0.730134	1.32607	1.0512	0.198445	0.530008	-1.12975	-1.97161	-0.270684	-1.07626	-0.507008	-0.724013	0.293916	1.3892	0.684521	0.723654	0.0858384	1.23523	1.43232	1.25415	1.54617	1.28331	1.26532	0.473057	0.701023	1.22775	0.879477	-0.151684	1.75818	0.724311	0.935924	1.49411	1.50437	1.46974	0.954925	0.767247	0.905611
RVBD_2430c	PPE41	-	FALSE	FALSE	FALSE	FALSE	0.559111	0.616122	0.193006	0.588155	0.80784	0.284356	0.625551	0.0465423	1.19148	-0.281644	0.420629	0.527601	0.72271	0.161862	-0.825665	0.572979	-0.10466	0.0112662	0.494777	0.426962	0.314451	0.0585735	0.716774	1.0557	0.118939	0.116225	0.455872	0.438062	0.284356	0.475933	0.291088	-0.122852	0.241871	-2.06505	0.53888	0.20636	-0.235094	0.300995	0.350984	0.321718	0.381051	0.105863	0.430449
RVBD_1933c	fadE18	mod04	F	F	F	F	-0.665476	-0.801756	-0.287262	-2.95484	0.135758	-0.433837	-0.0286128	-1.41769	-0.229803	-0.685626	0.501707	0.0589337	0.701188	-0.159758	0.358866	1.42717	0.122414	-0.247424	-0.193593	-0.915817	0.0915409	-0.572083	0.00993907	-0.0547791	-1.00868	-1.32804	0.077917	-0.282087	-0.433837	-2.16706	0.601676	0.569684	0.445536	0.793986	0.329867	0.804001	-0.725257	-0.935522	-0.139641	-0.152421	0.0375193	-0.019288	-0.341627
RVBD_2337c	Rv2337c	-	FALSE	FALSE	FALSE	FALSE	0.0388307	0.00946889	0.00484075	-0.259817	-0.547792	0.0707368	0.122232	0.431127	-0.315661	0.596044	0.404379	0.468065	0.159236	0.0676692	0.0240897	-1.6286	-1.05127	-0.310911	0.0959838	0.201416	0.0084652	0.226035	0.10934	0.599397	0.342863	0.103339	0.330422	0.175301	0.0707368	0.148509	0.0964112	0.13938	0.130621	-0.181348	0.23359	-0.40825	-0.0119579	0.0201659	0.00218202	0.189061	-0.231914	0.134172	-0.0375391
RVBD_0235c	Rv0235c	-	FALSE	FALSE	FALSE	FALSE	-0.0855212	0.0754798	-0.0886213	0.450593	-0.32978	0.117308	0.0178874	-0.547132	0.0354023	-0.611015	0.349327	0.738563	0.098642	-0.342147	-0.606451	0.470884	-0.83031	-0.295025	-0.170382	-0.0301734	0.26884	0.0331082	-0.00287268	-0.288184	0.209177	-0.11291	-0.102385	-0.226709	0.117308	0.1475	0.0448174	0.151023	-0.234628	-0.537906	-0.4182	-0.222139	-0.705757	0.333255	-0.11826	-0.0442112	-0.0103525	-0.104079	0.0107403
RVBD_1741	vapC34	-	FALSE	FALSE	FALSE	FALSE	-0.526605	0.107255	-0.337891	0.666391	0.293019	-0.0173663	-0.16492	0.428175	-0.151091	-0.613521	-0.391986	-0.296285	0.103472	-0.440216	-0.492647	-0.0794441	0.0551098	-0.376494	-0.156548	-0.414297	-0.366812	0.163137	-0.318694	-0.185894	-0.0127988	0.0494512	0.0800955	0.482319	-0.0173663	-0.118253	-0.126689	-0.0761542	-0.125857	-0.118362	0.0651542	-0.337948	-0.965889	-0.237397	-0.2989	-0.135656	-0.262438	0.0774699	-0.319486
RVBD_1932	tpx	-	TRUE	FALSE	FALSE	FALSE	-0.0722534	-0.505591	-0.909429	-1.86821	-1.23746	-0.715387	-0.44331	-0.613472	-1.78741	-3.39501	-0.549192	-0.340959	-0.656486	-0.690973	0.629917	0.39316	-1.82003	-0.370775	-1.21352	-0.227866	-0.518413	-0.40183	0.232632	-0.513551	0.325169	-0.394347	-0.494366	-0.872464	-0.715387	0.592012	-0.719062	-0.256129	-0.566708	-1.38071	-0.652503	-1.0105	0.217045	-0.661387	-0.384045	-0.436564	-0.701011	-0.203069	-0.651748
RVBD_1468c	PE_PGRS29	-	F	F	F	F	0.483358	0.343115	0.620201	1.0837	0.919947	0.2962	0.458998	-0.0912129	0.599844	-1.8036	0.474548	0.171763	-0.683751	1.21521	-2.02757	-0.667191	-0.203851	-1.29304	0.796142	0.669472	0.507617	0.388469	0.683275	0.869162	-0.0360818	-0.8377	1.05826	1.52659	0.2962	0.240857	0.655311	1.21133	0.642124	-0.312288	-0.363207	-0.0721207	-0.418568	0.358479	0.558786	0.548619	0.613407	0.888582	0.648009
RVBD_2284	lipM	-	FALSE	FALSE	FALSE	FALSE	-0.100133	-0.100375	-0.382737	-0.0750243	0.328493	-0.22251	-0.913943	-0.168475	-0.581068	0.256899	-0.400762	-0.523111	-0.38248	0.090784	-0.128172	-0.619653	-0.239514	-0.179005	-0.398171	-0.301696	-0.320389	-0.083039	-0.385677	-0.332155	-0.0620208	-0.54669	-0.438468	-0.579658	-0.22251	0.0534568	-0.265309	-0.0881604	-0.24423	-0.0958081	-0.546185	-0.156614	-0.356458	-0.370622	0.289646	-0.106932	-0.0258651	0.0937247	-0.278113
RVBD_2819c	Rv2819c	-	FALSE	FALSE	FALSE	FALSE	0.44305	0.445644	0.291663	-0.383808	0.576622	0.183554	0.00210739	0.49461	0.104533	-2.15051	0.481103	0.636004	0.618579	0.260597	0.667417	-0.122826	0.032064	0.438237	0.57546	0.172903	-0.0371444	0.260331	0.325489	1.01292	0.448612	0.0690464	0.386631	0.214068	0.183554	0.53029	0.226421	-0.213291	-0.0511806	0.0869279	-0.371611	0.280387	0.682289	0.425129	0.211904	0.283242	0.197961	0.393076	0.339454
RVBD_0476	Rv0476	-	TRUE	FALSE	FALSE	FALSE	-0.104657	-0.366186	-0.195493	0.0973895	-0.92622	-0.663507	0.0863053	-0.225472	0.427511	-0.649674	-0.247985	-0.0651538	-0.724379	-0.386253	-0.0711711	-0.244839	0.017786	-0.308585	-0.259388	0.249085	-0.00689881	-0.44154	0.191376	0.213255	-0.532067	0.324408	-0.383506	-0.529402	-0.663507	-0.331446	-0.416753	-0.721738	-0.363474	0.558964	-1.38786	-0.613343	-0.113163	-0.368512	-0.129606	-0.198773	-0.0819422	-0.442101	-0.214996
RVBD_1514c	Rv1514c	-	FALSE	FALSE	FALSE	FALSE	-0.257363	0.284004	0.0487929	-0.0451822	-0.241631	-0.314191	-0.510795	0.323522	0.141183	0.441991	-0.545143	-0.37029	0.0867866	-0.330258	0.0453687	0.382022	-0.401987	0.255267	0.128794	0.066683	0.256251	-0.0944661	0.198526	-0.273255	0.395718	0.334963	0.164307	0.20029	-0.314191	-0.0742193	0.105628	-0.0591816	0.169562	0.282637	0.0716908	0.116326	-0.458655	0.141931	0.137766	0.0827949	0.138205	-0.0938528	0.0667049
RVBD_1591	Rv1591	-	TRUE	FALSE	FALSE	FALSE	-0.678947	-0.336068	-0.222583	0.169538	0.00655877	-0.52509	-0.290939	-0.384849	-0.159091	-0.227273	-0.301358	-0.262773	0.116213	0.214054	-0.010889	-1.34232	0.0586998	-0.442506	0.0142969	-0.192399	-0.197993	0.188237	-0.46635	-0.308568	-0.503954	-0.324391	-0.146364	-0.468407	-0.52509	-0.864448	-0.102549	-0.0649485	-0.230353	-0.8418	-0.755458	-0.555134	-1.2972	0.0376473	-0.420479	-0.285989	-0.242621	-0.120673	-0.548836
RVBD_3533c	PPE62	mod06	FALSE	FALSE	FALSE	FALSE	-0.516213	0.215156	3.349e-05	-0.175531	0.516873	0.340382	0.721574	-0.179992	0.215726	0.758581	0.380653	0.305567	-0.00733585	-0.469949	0.563415	0.592517	0.031017	-0.0607463	0.172839	-0.0525736	-0.0110352	0.180646	0.0748323	-0.341372	0.134847	0.244615	0.329308	0.346007	0.340382	0.14559	-0.0651106	-0.129662	0.0642217	-0.43667	-1.14188	-0.0935601	-0.286609	0.104723	0.270856	0.254786	0.194116	0.0241419	0.340564
RVBD_3817	Rv3817	mod17	TRUE	FALSE	FALSE	FALSE	0.0806643	0.445944	-0.297946	-1.7028	-0.0264163	-0.274923	-0.620391	-0.524738	-0.538722	0.731399	-0.418331	0.315848	-0.577994	0.985661	-0.836407	0.180259	-1.99324	0.899975	0.232473	0.0742302	-0.081329	0.0130911	-0.0904485	1.03418	-0.561973	0.0112498	0.393376	-0.180156	-0.274923	0.92153	0.519795	0.526217	0.0213354	0.7684	-2.24112	-0.177311	-1.03984	0.285711	0.109496	0.325434	0.816782	0.837659	0.573938
RVBD_3666A	-	-	FALSE	FALSE	FALSE	FALSE	0.709435	0.12285	-0.484889	-0.0329976	-0.14008	0.563647	-0.43102	-0.492883	-0.0778788	-0.533867	0.509603	0.304815	0.800235	1.32519	0.370029	1.32978	0.106282	-0.826804	0.078066	0.333407	0.22174	0.460272	-0.0204134	0.555181	-0.166804	0.342353	0.37658	0.195959	0.563647	0.806094	0.0131072	0.289828	0.29838	-0.752866	0.0953682	0.709036	0.949872	0.165281	-0.309331	0.113024	0.386763	0.133709	0.160783
RVBD_3766	Rv3766	-	FALSE	FALSE	FALSE	FALSE	0.39143	0.537165	0.590174	1.23308	0.768949	0.507635	0.743144	0.805104	0.263473	-0.593275	0.478909	0.482816	0.852076	0.397536	-0.0447276	0.122471	0.39167	0.387396	0.801594	0.333989	0.376563	0.709579	0.687764	0.576705	0.807871	0.387403	0.141673	0.539969	0.507635	0.00933345	0.354674	0.910005	0.771844	0.205153	0.76904	0.346961	0.507385	0.561226	0.581431	0.510128	0.44562	0.199529	0.506544
RVBD_0072	Rv0072	-	FALSE	FALSE	FALSE	FALSE	-0.0325609	-0.0882314	-0.036088	0.0743279	-0.0394904	0.0117868	-0.150103	-0.162925	-0.25177	0.4275	0.31056	0.219173	0.186163	0.274638	0.0241138	-0.333586	0.513745	0.101964	0.0309461	0.13095	0.0816678	0.0788687	-0.104526	0.144403	-0.0404155	0.105928	0.108413	-0.0940378	0.0117868	-0.0157107	0.0310515	0.0863859	-0.0382305	-0.298813	0.385671	-0.0173071	-0.330742	0.250151	0.233164	0.108984	0.391279	0.0874745	0.0987904
RVBD_1688	mpg	mod17	F	F	F	F	-0.291141	-0.493102	-0.0996148	-1.07522	0.519092	-0.222253	-0.02989	-0.60416	-0.176443	-0.309134	-0.451326	-0.447501	-0.129911	0.48851	-2.25222	-0.772294	0.21998	-0.189026	0.124164	0.336194	-0.282526	0.10711	-0.228894	-0.180971	0.0379749	0.394571	-0.150283	-0.0797403	-0.222253	0.218956	0.00412377	-0.00749576	-0.0700197	-0.305882	-0.16952	-1.22897	-0.61922	0.265915	0.00872911	0.25017	0.216383	0.116058	-0.168472
RVBD_0996	Rv0996	-	TRUE	FALSE	FALSE	FALSE	-0.429159	-0.817595	-0.677849	-0.552466	-1.12783	-0.588558	-0.491458	-0.779407	-1.43712	-0.513146	-0.403331	-0.624683	-0.143331	-0.454109	0.370423	-0.190217	0.261805	-0.0144666	-0.805537	-0.525547	-0.513742	-0.473426	-0.65725	-0.140064	-0.413758	-0.0640431	-0.659792	-0.575484	-0.588558	-0.85908	-0.134586	-0.38478	-0.198569	-0.691026	-0.727963	-0.621456	-0.681302	-1.12769	-1.05864	-0.726553	-1.08724	-0.659717	-1.10375
RVBD_3146	nuoB	mod06	F	F	F	F	0.275523	0.0942672	-0.332535	-0.344977	0.644785	0.464529	1.147	1.41715	1.03774	-0.080232	0.560887	0.387635	-1.30088	-0.257626	-1.62829	0.347468	-0.354184	-0.0116677	-0.707351	-0.0694871	-0.667357	-0.664294	-0.0462144	-0.835823	0.659715	0.0653052	0.164813	-0.109392	0.464529	-0.356652	-0.803378	0.829798	-0.147379	-0.747186	0.0803625	-0.889222	-5.48776	-0.71038	0.370123	0.346902	0.787562	-0.565582	0.201166
RVBD_0827c	kmtR	-	FALSE	FALSE	FALSE	FALSE	-0.878599	0.530911	0.010822	1.33003	0.303146	0.301687	0.464376	0.863089	0.623385	0.413578	-0.653906	-0.264365	-0.325583	-0.557351	0.62805	0.317304	0.0252446	-1.20149	0.182123	-0.139191	-0.240337	-0.861731	0.215137	0.30464	-0.437996	0.126807	0.142073	0.225199	0.301687	-1.76956	-0.0129488	-0.564749	0.367019	0.645114	-1.4355	0.0358935	-0.48307	0.266599	0.705053	0.252429	-0.0505859	0.608457	0.1009
RVBD_0697	Rv0697	-	FALSE	FALSE	FALSE	FALSE	-0.142136	0.2302	-0.511557	0.944197	-0.929758	-0.397584	-1.1844	-0.436418	0.393065	-2.82366	-1.00134	-0.672849	-2.49791	-1.71118	0.810214	-9.1419	-0.576317	0.448542	-2.79949	-0.436305	-0.413651	-1.5526	-0.979749	-0.718216	-0.941131	-0.933832	-0.626711	-1.71235	-0.397584	0.687814	-0.350039	0.285869	-0.282056	-0.950177	1.37188	-0.211661	-1.29194	-0.62749	-0.477004	-0.220088	-0.47357	-1.18566	-0.528667
RVBD_1546	Rv1546	-	FALSE	FALSE	FALSE	FALSE	0.362784	0.397991	0.590559	0.0732915	0.417527	0.395558	0.113518	0.0263674	0.578016	0.369884	0.323363	0.455785	0.0869434	-0.325753	-0.635894	0.748105	0.231455	0.274113	0.0484146	0.6791	0.233934	0.18281	0.327235	0.367125	0.211021	0.500008	0.111077	0.329067	0.395558	0.254804	0.183376	0.450672	-0.0446829	0.819182	0.0140365	0.0985836	-0.129761	0.206929	0.439519	0.227438	0.572387	0.299895	0.36112
RVBD_1488	Rv1488	-	FALSE	FALSE	FALSE	FALSE	0.311672	0.0214673	0.225591	0.141392	0.0248207	0.0724508	0.223924	0.094934	0.143199	0.0575337	0.245882	0.201365	-0.0766537	0.318502	0.18439	0.0907898	-0.166197	0.0433132	0.08121	0.370686	0.0460093	0.0614219	-0.115849	0.106298	0.193436	0.125046	-0.136716	-0.109227	0.0724508	-0.106522	0.0289425	0.0797988	0.0651969	-0.302308	-0.245949	0.13522	-0.424374	0.037922	0.236759	-0.0162059	-0.0228299	0.021385	0.219466
RVBD_1968	mce3C	-	FALSE	FALSE	FALSE	FALSE	0.0863372	-0.201076	0.386939	0.0403788	0.567218	-0.0669761	0.0229833	-1.1973	-0.719125	0.991101	0.474401	0.316513	0.276333	0.19334	0.446071	1.60817	0.727538	0.00991751	-0.322632	0.356077	-0.453953	0.0148863	0.0940467	-0.102826	-0.126456	-0.522663	0.289386	-0.572536	-0.0669761	0.96738	-0.0312009	0.101268	0.440058	0.815164	0.641817	0.287961	0.356096	0.0186159	0.164199	0.116408	0.205638	0.408424	0.208552
RVBD_2336	Rv2336	mod20	F	F	F	F	0.122577	-0.242024	0.25862	0.016902	0.733885	0.105671	0.337427	0.440198	-0.0839254	-2.16466	0.357842	0.333304	-0.0535614	-0.833594	-0.380939	-0.110759	0.27186	0.582033	0.330579	-0.113947	0.336292	0.375422	-0.0984467	0.158146	0.203404	0.178448	0.356996	0.470324	0.105671	-0.173651	0.0841459	0.543746	0.127389	0.0194378	0.198336	0.624866	0.438879	0.252884	0.569372	0.29075	-0.0724972	0.53818	0.649056
RVBD_2499c	Rv2499c	-	FALSE	FALSE	FALSE	FALSE	-0.624735	-0.328955	-0.227177	0.1862	-0.343129	-0.376732	-0.819328	-0.0660894	-0.131088	0.484176	-0.665471	-0.84011	-0.81395	-0.901203	-0.430224	0.0673448	-0.688125	-0.441244	-0.299547	0.161638	-0.232743	-0.0720725	-0.333375	-0.0857468	-0.404616	-0.556756	-0.285917	-0.223877	-0.376732	-0.500835	-0.290504	-0.336137	-0.20788	-0.554388	-0.32349	-0.255206	0.609386	-0.0926863	0.0754273	-0.108233	-0.117495	-0.256858	-0.240049
RVBD_3120	Rv3120	-	TRUE	FALSE	FALSE	FALSE	-0.651131	-0.355807	-0.0206728	-1.17765	0.127554	-0.198956	-0.283574	0.346009	0.073862	-1.26147	-0.355221	-0.157292	-0.856699	-0.412393	-1.32571	-2.91253	-0.0201313	-0.199131	-0.326106	-0.123321	-0.405774	-0.304804	-0.590626	0.0384889	0.149072	-0.017714	-0.0145271	-0.163375	-0.198956	-0.518047	-0.00607562	-0.0566581	-0.0699032	0.130467	-0.957452	-0.606151	-0.366646	0.0063885	-0.162632	-0.325831	-0.331551	0.111447	-0.0935855
RVBD_2374c	hrcA	mod15	TRUE	TRUE	TRUE	TRUE	-0.518064	-3.47595	-2.12725	-2.40147	-2.39841	-3.09912	-0.78004	-0.127371	0.963025	-9.81085	0.544781	0.149582	-1.63743	-2.50031	-1.85377	-3.99959	-0.27546	0.258929	-4.10711	-2.26337	-1.90465	-3.14782	-2.51864	-2.53503	-0.581228	-2.60797	-3.59779	-3.91671	-3.09912	-4.51257	-1.94085	-3.93552	-3.11912	-0.163679	-0.985117	-1.49776	-1.64323	-3.08894	-0.0752785	-1.83295	-2.25545	-2.42606	-2.04541
RVBD_0152c	PE2	-	FALSE	FALSE	FALSE	FALSE	0.0989312	-0.0540605	0.132836	-0.228786	0.195672	0.138177	0.209835	0.160429	0.0896283	0.0633786	0.148459	-0.0682085	-0.102262	-0.00524247	-0.0302365	0.123568	0.0824149	-0.0677528	0.0203325	0.0167002	0.0673663	-0.0310979	-0.000289653	0.142049	0.0472008	0.10038	0.100156	0.0906025	0.138177	0.12195	-0.0203479	-0.127046	0.00192739	0.016723	0.148508	-0.15611	-0.133247	0.0556904	0.162917	0.033658	0.139077	0.05766	0.108276
RVBD_3286c	sigF	mod06	TRUE	FALSE	FALSE	FALSE	-0.707581	-0.0388165	-0.276044	-0.153092	-0.21351	-0.722294	-0.459118	-0.114794	-1.83207	-0.20687	-0.427341	-0.243075	0.294122	0.188524	0.153257	-1.25077	-0.0882078	-0.485308	0.0161249	-0.157268	-0.0620968	-0.546282	-0.629884	-0.809845	0.0549431	0.195815	-0.189958	-0.169053	-0.722294	-0.184948	-0.159983	-0.657585	0.0250338	-1.27835	-0.0158414	-0.0563193	-1.14155	-0.463488	-0.574801	-0.403753	-0.576995	-0.371845	-0.544518
RVBD_3229c	desA3	mod20	TRUE	FALSE	TRUE	FALSE	-0.221061	-0.216244	-0.557517	-0.460564	-0.570834	-0.426768	-0.683264	-0.486976	-0.722164	-1.03145	-0.236402	-0.273967	0.428507	-0.345739	0.198459	-0.923537	-0.849158	-0.112848	-0.446457	-0.309268	0.169621	-0.294903	-0.476814	-0.737427	-0.0819566	-0.520957	-0.232894	-0.257351	-0.426768	-0.533268	-0.299337	-0.278155	-0.108183	-0.0786223	-0.192229	-0.419891	0.472097	-0.46243	-0.345428	-0.078362	-0.570816	-0.443054	-0.621504
RVBD_1073	Rv1073	-	FALSE	FALSE	FALSE	FALSE	0.20395	0.221539	-0.0214776	0.0528625	-0.0255108	0.0111636	-0.00227326	-0.184135	-0.1923	-0.0782978	0.222992	0.3219	0.057755	-0.117643	-0.0707587	0.251791	-0.683691	-0.091821	-0.297345	-0.00825321	-0.265735	-0.349203	-0.0669682	0.354256	-0.0705861	-0.413621	-0.0332542	-0.0950252	0.0111636	-0.0723151	-0.102949	-0.0464879	-0.151703	-0.375772	0.17986	-0.0623295	-0.0256486	0.0226046	-0.00341489	-0.028882	0.0674062	-0.130001	-0.0472217
RVBD_3803c	fbpD	-	FALSE	FALSE	FALSE	FALSE	-0.472092	-0.253867	-0.167875	-0.702814	-0.14191	-0.2193	-0.106287	-0.237673	-0.190047	-0.391365	-0.347735	-0.531364	-0.361012	0.179787	-0.427418	-0.23373	-0.36145	-0.0921619	-0.39997	0.0415064	-0.0389771	0.0172673	-0.299591	-0.76057	-0.164081	-0.0655488	-0.166726	-0.355628	-0.2193	-0.702732	-0.133557	-0.0658875	-0.0108902	-0.148129	-0.0999197	-0.13799	-0.24537	-0.137366	0.00932817	-0.068324	-0.229758	0.205806	-0.182103
RVBD_1472	echA12	-	FALSE	FALSE	FALSE	FALSE	0.175863	0.132355	0.269106	0.249706	0.6017	0.677273	0.205607	0.0597712	0.543063	-0.258587	0.345562	0.358533	-0.0894799	0.135864	0.619163	0.734479	-0.837853	-0.761246	-0.00743088	-0.118241	-0.176548	-0.29835	0.0865067	0.0398433	0.00955872	0.000735291	0.258602	0.232486	0.677273	-0.0987055	0.150969	0.229302	0.18994	0.237406	-0.165962	0.199525	-0.0980595	0.587002	0.49891	0.359032	0.49435	0.246358	0.323838
RVBD_1066	Rv1066	-	FALSE	FALSE	FALSE	FALSE	-0.517318	-0.372088	-0.350101	-0.645255	-1.54417	-0.4501	-0.564479	-0.408329	-0.376838	-0.111103	-0.721764	0.405868	-0.906926	-0.672207	0.189931	0.00676767	0.148723	0.225061	-0.319193	-0.728781	-0.040482	-0.219124	-0.24498	-0.609349	-0.949932	0.058033	-0.138244	-0.29225	-0.4501	0.396069	-0.212977	-0.326077	-0.701505	-0.460301	-0.237116	-0.661682	0.604188	-0.409389	-0.563315	-0.373445	-0.3096	-0.276322	-0.430774
RVBD_1430	PE16	-	FALSE	FALSE	FALSE	FALSE	0.00364637	-0.0768126	0.0459797	0.331687	-0.1032	0.151623	0.105218	0.0789782	-0.120262	0.397882	0.277463	0.199635	-0.0616735	0.0607982	-0.287383	-0.24759	-0.205792	0.0984017	0.163105	0.0444219	0.0284265	-0.146844	0.168382	0.222155	0.406495	0.0957429	-0.206499	-0.398317	0.151623	0.298607	0.00906511	-0.0339807	-0.0335706	0.513998	-0.423303	-0.368436	-0.0169987	-0.0982511	0.0391338	-0.0209487	0.0396641	0.256666	0.139312
RVBD_1543	Rv1543	mod05	TRUE	FALSE	FALSE	FALSE	-1.49195	-0.123392	-0.650099	-0.555335	-1.10277	-0.0582734	0.998135	0.396668	-0.2679	-10.3162	0.347512	0.74839	-0.264375	0.0632457	-1.19481	-6.03509	-0.982002	-1.4297	-0.461781	-0.390316	0.204989	-0.887579	-0.277183	-0.388826	-0.260704	0.752739	-1.03017	-1.77764	-0.0582734	0.703315	-0.552415	0.114327	-0.263106	-1.06887	-1.06277	0.754181	-2.28233	0.230782	0.445239	0.557114	0.0604003	-0.101001	0.124439
RVBD_1453	Rv1453	-	FALSE	FALSE	FALSE	FALSE	-0.139999	-0.00581085	0.0431098	-0.178388	0.176637	-0.160332	-0.320757	0.234393	-0.393385	-0.0342395	-0.205199	-0.210762	-0.00141753	0.0389536	0.137316	-0.205403	0.264233	0.253075	-0.044895	0.137713	0.0175362	-0.0182044	-0.0132942	0.228493	-0.012107	-0.117213	-0.0764799	-0.108776	-0.160332	0.116631	0.131633	0.142727	-0.0722073	0.580617	0.328118	0.0823957	0.198682	0.166842	0.0165078	0.0468672	0.00495173	-0.0468897	0.0546849
RVBD_0969	ctpV	-	FALSE	FALSE	FALSE	FALSE	-0.0439817	-0.0688781	-0.314425	-0.404987	0.237054	-0.322109	-0.117439	0.109621	-0.0799025	0.257108	-0.277782	-0.0317192	0.160331	-0.107491	-0.174754	-0.195825	0.038045	-0.0660641	0.0760964	0.10071	-0.286962	-0.0814692	0.0898341	0.253606	-0.0312649	0.0700672	-0.186387	0.0235545	-0.322109	-0.119979	0.0223192	-0.170019	-0.0159685	-0.274374	-0.120569	-0.340841	-0.190935	-0.193738	-0.332399	0.0171583	-0.128389	-0.149101	-0.18041
RVBD_3417c	groEL1	-	FALSE	FALSE	FALSE	FALSE	1.16203	0.695174	0.460379	0.857037	1.55643	-0.0470122	0.748494	0.53489	0.500816	-1.46012	0.521649	0.830151	0.33113	0.244557	0.173648	-1.19354	1.19997	0.0400093	1.06766	0.40734	1.4286	1.36734	1.36225	0.11304	1.14531	1.31661	1.24596	0.723839	-0.0470122	1.28214	0.549137	0.97099	0.891333	2.42101	1.47638	1.03222	1.06556	0.84149	0.254156	0.677703	-0.0667825	0.464044	0.435191
RVBD_1344	mbtL	-	FALSE	FALSE	FALSE	FALSE	-0.311437	0.262263	0.0382478	-0.221763	0.0477186	-0.276953	0.0705866	0.21703	0.117637	0.275565	-0.406665	-0.248709	-0.547536	-0.195722	-0.186337	0.381142	0.203196	0.10767	-0.0453986	0.00683606	0.0107772	-0.0145551	0.00130289	-0.0280345	-0.199913	0.261386	-0.428571	-0.0243786	-0.276953	-0.169729	-0.190976	-0.0424114	0.114401	-0.0421238	-0.0556558	0.509689	0.449389	-0.194251	0.0491965	-0.178706	0.0404537	-0.0446669	0.0850068
RVBD_0425c	ctpH	-	FALSE	FALSE	FALSE	FALSE	-0.10975	0.00948063	0.387855	-0.234369	0.357639	-0.176502	0.422856	0.28789	0.577192	0.205505	0.24853	0.157931	0.0439194	0.0900465	-0.235762	-0.0711321	-0.194164	-0.0994595	0.0400503	0.349418	0.294163	0.0675184	-0.136087	0.021841	0.113149	-0.189854	-0.0188612	-0.0407891	-0.176502	0.0268823	0.0197554	0.323112	-0.010474	0.16013	-0.150571	-0.216328	-0.0389427	0.0154648	-0.033787	0.223482	0.228648	0.401478	0.185942
RVBD_0973c	accA2	mod06	TRUE	FALSE	TRUE	FALSE	0.482913	-1.15453	-0.777018	-1.53807	-7.69386	0.369484	0.32462	0.310866	0.420726	0.143325	0.830436	1.21104	0.353578	-0.413403	-0.350641	0.83277	-2.96055	-0.288222	-1.07841	0.422506	-0.0729196	0.483547	-1.86414	0.383407	0.0629077	-0.247296	0.0932597	-0.179812	0.369484	0.301652	0.0776887	-1.26949	0.0300975	-2.08927	-0.110757	0.667982	1.93337	0.0091017	-0.858761	-0.303053	-0.896808	-0.335547	0.142627
RVBD_0435c	Rv0435c	mod07	TRUE	FALSE	FALSE	FALSE	0.0979681	-0.206397	-0.0981689	0.0166641	-0.182921	-0.117982	-0.155063	-0.604985	-0.151005	-0.0928105	-0.157604	-0.258411	-0.398046	0.0637744	-0.0527821	-0.182879	0.125821	0.102883	0.124673	0.067627	-0.105311	-0.101019	-0.0590032	0.0987551	0.0394893	-0.191796	0.100964	-0.0927639	-0.117982	0.0141461	-0.153118	-0.0643654	0.00875053	-0.32883	0.142653	-0.735991	0.0722784	-0.0344233	0.0209238	-0.020951	-0.0101705	-0.181925	-0.135748
RVBD_1123c	bpoB	mod07	F	F	F	F	-0.112331	-0.212767	-0.221104	-0.767484	0.0516736	-0.291094	-0.229804	0.186587	-0.689707	0.754253	-0.427278	-0.206574	0.42851	-0.00529788	-1.6313	-1.03654	0.273859	-0.339853	-0.296921	-0.112249	-0.18142	0.108479	0.61455	-0.153282	-0.350062	0.239701	0.0615949	0.328291	-0.291094	0.118322	-0.437095	0.167878	0.0668195	-0.418706	0.258026	-0.192429	-0.58217	-0.160647	-0.119623	-0.169823	-0.139595	0.0835682	-0.176793
RVBD_2935	ppsE	mod08	TRUE	FALSE	FALSE	FALSE	1.42939	0.790718	0.687951	0.910609	0.863693	1.20172	0.850276	0.682793	0.88529	1.08932	0.22173	0.492987	-1.07145	-2.20286	-0.585955	-0.946318	-0.489344	-0.385958	0.360549	1.1337	0.46584	0.657003	-0.0288124	1.13099	1.47706	1.2209	1.40536	1.06234	1.20172	0.106432	0.709331	1.2143	0.962462	0.434508	1.69645	0.668994	0.752742	1.49638	1.46014	1.34695	0.855221	0.685253	0.80025
RVBD_2939	papA5	mod08	F	F	F	F	1.45999	0.918382	0.861121	1.01599	1.0359	1.28789	0.813372	0.752766	1.41433	1.00677	0.28059	0.572953	-0.858145	-1.73248	-0.00222761	-1.02842	-0.650721	-0.185853	0.384827	1.16624	0.601788	0.775982	-0.134011	1.33251	1.58584	1.18069	1.41987	1.14711	1.28789	0.415276	0.663889	1.40916	0.912311	-0.237986	1.90715	0.952018	1.0591	1.59004	1.45628	1.38738	0.890179	0.71533	0.916164
RVBD_1537	dinX	mod15	TRUE	FALSE	FALSE	FALSE	-0.0122465	0.168607	0.160712	-0.116927	-0.114602	0.0664254	-0.0898996	-0.164231	-0.559424	-0.189022	0.341719	-0.332526	0.163668	0.185258	-1.74295	-0.940885	-1.23004	-0.110794	-0.00968764	0.297875	0.149786	-0.208398	-0.309741	-0.0513832	-0.0358376	-0.458588	0.291719	0.45831	0.0664254	0.0591257	0.191898	0.0779202	0.107002	-0.0335947	-0.376995	-0.0870817	-0.883693	-0.0304029	0.211929	0.3968	0.159806	0.301779	0.121995
RVBD_2566	Rv2566	mod15	TRUE	FALSE	TRUE	FALSE	-0.0974221	-0.204836	0.0159119	-0.488027	0.0533964	-0.113212	-0.0909963	-0.112255	-0.0383418	-0.020517	-0.186007	-0.0480024	-0.597196	-0.43346	-0.216947	-0.730722	0.206115	-0.0255278	0.120216	0.112088	0.0607925	0.135796	0.106303	0.115336	-0.124613	0.00303761	-0.0262645	-0.180113	-0.113212	0.0821608	-0.131901	0.0380719	0.0234128	-0.437949	0.192101	-0.504532	-0.737404	-0.0269468	-0.199597	-0.278729	-0.255498	0.0770539	-0.307409
RVBD_0104	Rv0104	-	FALSE	FALSE	FALSE	FALSE	0.117131	-0.0874124	-0.06084	-0.169014	-0.509614	-0.137327	-0.0204763	-0.0164799	-0.181646	-0.207573	0.246647	0.274796	0.101524	-0.0539274	0.0848371	-0.692967	-0.250929	0.267571	-0.25324	0.169824	-0.101439	-0.0917532	-0.0551397	-0.481219	0.219964	-0.209472	-0.0809067	-0.138476	-0.137327	-0.0211921	-0.0122324	0.262038	0.000941365	0.0753383	-0.0163324	-0.234183	0.0168942	-0.0666578	-0.0412196	-0.0352983	0.035565	0.0588421	-0.024863
RVBD_0109	PE_PGRS1	-	FALSE	FALSE	FALSE	FALSE	0.146838	-0.580949	0.369937	-0.264649	-0.538793	0.116688	0.620394	-0.188525	0.0318318	0.730502	0.383542	-0.00455981	-1.06864	0.866453	-0.96272	-0.303653	-0.0567552	0.0488056	0.0559295	-0.26548	-0.0888458	0.353553	0.247371	0.444658	0.285911	0.454218	0.220088	0.00310991	0.116688	0.0391909	0.243455	0.0381303	-0.0952433	0.438835	0.153095	-0.53096	-0.490356	-0.465986	0.155407	0.219188	0.186796	0.108895	0.0311003
RVBD_0491	regX3	-	TRUE	FALSE	FALSE	FALSE	-0.600259	-0.39619	-0.252627	-0.431056	-0.190262	-0.631962	-0.128635	0.351795	-0.23907	-0.765068	-0.428647	-0.237125	-0.535717	-0.437084	-0.344327	-0.294146	-0.110258	-1.045	-0.631795	-0.725462	-0.524784	-0.741313	-0.369202	-0.0440765	-1.44057	-0.389362	-0.305398	-0.264425	-0.631962	-0.583413	-0.185697	0.065398	-0.118132	-0.0485203	-0.598614	-0.706874	0.083713	-0.511003	-0.811055	-0.710051	-0.34752	-0.318722	-0.757639
RVBD_0539	Rv0539	-	FALSE	FALSE	FALSE	FALSE	-1.05368	-0.720219	0.0143664	-0.939055	0.736441	0.647347	1.28977	0.341201	-1.97466	0.565424	-0.556422	0.222736	-0.79513	0.515375	0.436075	-2.90572	-1.65545	-0.379158	-0.429318	-0.284485	0.460104	-0.0620077	-0.96422	0.773476	0.130126	0.638531	0.782952	1.21129	0.647347	1.37345	-1.07895	-2.84746	-0.227718	1.23699	-0.143635	0.377342	1.04417	0.0359814	0.722943	0.296865	0.621143	0.587361	0.344211
RVBD_0837c	Rv0837c	-	F	F	F	F	-0.565615	-0.176515	-0.127307	-0.105605	-0.00259469	-0.34934	-0.228529	0.184412	-0.190726	0.143376	-0.221456	-0.230795	0.0425554	-0.118715	-0.0786326	0.285584	0.265043	0.0767357	-0.187573	-0.537645	-0.230057	-0.333398	-0.181828	-0.238344	-0.0809746	0.0372389	-0.0684056	-0.299771	-0.34934	-0.273322	-0.167106	-0.398293	-0.168965	-0.158663	-0.161439	-0.125321	-0.974806	-0.202202	-0.227423	-0.174111	-0.149456	-0.21013	-0.169354
RVBD_0886	fprB	-	FALSE	FALSE	FALSE	FALSE	-0.446027	-0.179871	0.00615191	-0.552842	-0.214603	-0.150405	-0.189415	-0.392933	-0.360747	0.144468	-0.266072	-0.0114634	-0.112443	-0.196175	-0.802908	-0.476138	-0.485412	-0.125794	-0.00455601	-0.30025	0.0732157	-0.177297	-0.421981	-0.164164	-0.121633	-0.266623	0.0429309	0.0193743	-0.150405	-0.81118	-0.115541	-0.222789	0.0144001	-0.0273254	-0.417291	-0.371058	-0.342749	-0.0477545	-0.142131	-0.147189	0.110383	-0.0156723	-0.147816
RVBD_0908	ctpE	-	FALSE	FALSE	FALSE	FALSE	-0.256953	0.0962566	0.13692	-0.0810634	0.202966	0.159648	-0.23834	-0.103516	-0.036157	0.029249	-0.274524	0.0046674	-0.0031331	0.0789424	-0.0612033	-0.298584	-0.259724	-0.183555	-0.135327	-0.383923	-0.240415	0.0379462	-0.0654183	0.0670153	0.248825	0.0734996	-0.0606762	-0.218232	0.159648	0.246981	0.0543372	0.0202664	0.0279065	-0.114157	-0.141644	-0.178146	0.069466	0.0873096	0.0430469	-0.00538574	0.0587168	-0.198188	0.0550544
RVBD_1086	Rv1086	-	TRUE	TRUE	TRUE	TRUE	-7.90904	-3.68286	-2.74544	-4.31686	-6.8877	-4.58352	-1.14534	-7.90861	-0.0146501	-6.90585	-1.09648	-2.32319	-5.33063	-3.44046	-7.91107	-6.89871	-7.90111	-7.90623	-7.90885	-3.10896	-7.89673	-7.90568	-4.57088	-7.88391	-3.98013	-7.89639	-7.88504	-4.62016	-4.58352	-3.49877	-4.04888	-1.14653	-3.37737	-6.88636	-7.89627	-7.90968	-7.90893	-4.51364	-4.5702	-7.89859	-3.37357	-4.05831	-2.7742
RVBD_1134	Rv1134	-	F	F	F	F	-0.25008	0.388525	-0.414125	1.05757	0.920846	0.125254	0.337952	0.749354	-0.928043	-0.535814	0.519556	0.258762	-0.635736	0.883921	-0.0813998	0.582254	-2.41684	-0.375795	0.615879	-0.347667	-0.0858776	-1.23948	0.642993	0.844999	-0.130515	0.0198791	0.0957066	0.16324	0.125254	-0.009528	0.311146	-0.523651	-0.547102	0.299118	0.0198614	-0.464286	-0.291774	-0.503834	0.108285	0.533595	0.496914	-0.13455	0.012308
RVBD_1209	Rv1209	-	FALSE	FALSE	FALSE	FALSE	0.524999	-0.269521	-0.785988	-0.571409	-0.0338486	0.0841632	0.128113	-0.219463	0.409674	-0.343459	0.450064	0.73916	0.501717	-1.67475	-0.943958	0.598864	-1.58243	-0.319613	-0.683895	-0.211764	-0.574913	-0.840565	-0.611123	-0.178953	-0.134508	-0.912161	-0.0389224	-0.328173	0.0841632	0.11059	-0.0188001	0.130683	-0.540486	0.68055	-0.823419	-0.324006	-0.1703	0.619285	0.104335	0.529316	0.183256	0.471114	0.142487
RVBD_1270c	lprA	-	FALSE	FALSE	FALSE	FALSE	-0.192129	0.407171	0.0211249	0.311938	0.191564	0.360348	-0.127059	-0.769546	-1.47264	-0.71647	-0.432648	-0.222479	-0.312234	-0.121071	-0.327237	-1.47034	0.365662	0.403378	0.0322602	0.0799539	-0.422152	-0.0536594	0.189363	-0.0814664	0.300029	0.0165895	-0.102427	0.315675	0.360348	-0.282346	0.162498	-0.0394745	-0.125507	0.260373	0.321209	0.208289	-0.371841	0.0789642	0.29585	0.0547415	0.0358748	0.0407331	0.0645055
RVBD_1271c	Rv1271c	-	TRUE	FALSE	FALSE	FALSE	0.154777	0.0659271	-0.24199	-0.785742	0.0113639	-0.194455	-0.22774	-2.02715	-0.433792	-0.512427	-0.5419	-0.871786	-0.547553	-0.286019	0.5423	-4.00444	-1.16205	0.50249	-0.158154	0.0763523	0.169362	0.132962	-0.649605	0.207765	0.278752	-0.0872679	-0.281964	-0.135056	-0.194455	-0.563138	-0.194966	-0.102626	0.0325637	-0.245395	-0.256172	-0.584899	-0.825224	-0.150657	-0.220412	-0.268436	-0.334576	-0.190811	-0.0266685
RVBD_1473A	Rv1473A	-	FALSE	FALSE	FALSE	FALSE	-0.589278	0.235599	-0.846261	-3.4692	-8.26663	0.329494	0.314557	-0.0801795	0.113919	0.376873	0.819511	0.245336	-0.0583737	-0.00766605	-0.419199	0.0901175	0.401536	0.311727	0.329382	0.625374	-0.393738	0.0664498	0.344131	-0.539155	0.278101	0.954457	-0.53259	-0.0819161	0.329494	0.338159	-0.917763	-0.369159	-0.0973185	0.761427	0.0577336	0.614963	-0.600597	0.260979	0.0592417	0.0599341	-0.215806	0.0444151	0.566361
RVBD_1509	Rv1509	-	FALSE	FALSE	FALSE	FALSE	-0.165812	0.196377	0.581413	1.01277	0.134043	0.597648	0.731306	-0.00780009	-1.04297	-0.274531	0.560599	0.883343	0.981778	0.523192	0.645135	-0.292664	-0.536331	0.550712	0.561497	0.334117	-0.311578	-0.0593784	1.25636	1.17362	0.525304	0.317774	0.340557	0.0699644	0.597648	0.837147	-0.196649	0.035074	0.389334	1.24224	-0.605757	0.781843	0.0845643	-0.382561	0.274032	0.389022	0.51551	0.0444339	0.469806
RVBD_1521	fadD25	-	F	F	F	F	0.490246	0.316553	0.202589	0.463167	0.0291024	0.0188095	0.187794	-0.180789	0.284874	-0.229127	0.24185	0.311642	0.00116085	0.120167	0.351053	-1.04967	0.0943373	0.687041	-0.0202076	0.0428917	0.103872	-0.00586244	-0.104261	0.667556	-0.0457661	0.449798	-0.057958	0.0136122	0.0188095	-0.480321	0.201762	0.0304594	0.259834	-0.0886019	-0.105061	0.481488	-0.0970328	0.073015	-0.0852736	0.11422	0.248293	0.113785	0.180098
RVBD_1581c	Rv1581c	-	F	F	F	F	0.115902	0.305886	-0.209922	-0.254521	-0.414183	0.34494	0.404492	0.156026	0.593411	1.00008	0.560803	0.620371	0.208714	-0.605263	-0.688967	-5.29959	0.0739238	0.409338	-0.208557	0.22475	-0.128039	0.096791	-0.0329163	-0.453512	0.188324	-0.367021	0.213313	0.0726095	0.34494	-0.481828	-0.0279438	-0.680136	0.00283096	-0.563599	0.170492	-0.261069	0.182795	0.321962	0.22291	-0.0632904	-0.0702336	0.15356	0.351014
RVBD_1731	gabD2	-	FALSE	FALSE	FALSE	FALSE	-0.105132	-0.148967	-0.190041	0.0947822	-0.0417674	-0.339169	-0.460931	-0.415114	-0.257737	-0.25157	-0.283141	-0.404851	-0.186371	-0.0884709	-0.399411	-0.934731	-0.320874	-0.208157	-0.46725	-0.138525	-0.0471465	-0.129909	-0.210814	0.213885	-0.116603	-0.0969397	-0.131158	-0.0351991	-0.339169	0.132495	-0.334598	-0.0588937	-0.0365409	0.244326	-0.128448	-0.334059	-0.703779	-0.202878	-0.12946	-0.156332	-0.0892775	0.169498	-0.20545
RVBD_1956	higA	-	FALSE	FALSE	FALSE	FALSE	-0.223396	-0.386543	-0.21362	-0.165004	-0.0352878	-0.231719	-0.459994	0.0752634	-0.470888	-0.531954	-0.403083	-0.446318	-0.908257	-0.828052	-0.36955	0.183443	-0.208738	-0.268736	-0.236349	-0.256514	-0.184762	-0.326865	-0.0533274	-0.587942	-0.33073	-0.297464	-0.563208	-0.287185	-0.231719	-0.536767	-0.487595	-0.0606666	-0.359718	-0.10661	0.309477	0.0566365	-0.132111	-0.224711	-0.228936	-0.237146	-0.263328	-0.256641	-0.326036
RVBD_1992c	ctpG	-	TRUE	FALSE	FALSE	FALSE	-0.355654	-0.352495	-0.215618	-0.159039	-0.0769143	-0.36008	-0.264967	-0.893544	-0.205063	-0.375204	-0.212643	-0.206434	-0.0581881	-0.220317	-0.858736	-0.544211	-0.269299	-0.538662	0.025905	-0.147424	-0.203222	-0.158372	-0.227168	-0.00642356	-0.129826	-0.350324	-0.143831	-0.0682957	-0.36008	-0.0888085	-0.0903109	-0.203813	-0.120527	-0.0965852	-0.111992	-0.234319	-0.169329	-0.145654	-0.040428	-0.125671	-0.0893781	-0.0844387	-0.152856
RVBD_2009	vapB15	-	FALSE	FALSE	FALSE	FALSE	-0.123495	0.213671	-0.155267	0.237638	0.533799	0.0763175	-0.72712	-1.36407	0.302596	-0.109361	-0.788478	0.0221107	-0.250365	0.225572	-1.01408	-3.83399	-0.545354	0.370149	-0.101607	-0.126247	-0.407338	0.300564	-0.246746	-1.20004	-0.531809	-0.515807	0.00964278	0.104428	0.0763175	-0.0931079	-0.127208	0.646	-0.0815475	-1.46353	0.175956	-0.530411	0.235537	-0.260804	0.379168	0.0613248	0.483696	0.117188	0.0179301
RVBD_2160A	Rv2160A	-	FALSE	FALSE	FALSE	FALSE	0.0838772	-0.221974	0.185221	-0.28617	1.13699	-0.301226	0.722801	0.113386	0.47169	0.961759	0.738825	-0.219779	-2.30186	0.408748	-1.88904	-0.0222583	-0.246651	-0.401882	0.35858	0.726727	0.296228	-0.216675	0.105141	0.593245	-0.504439	-0.538775	-0.280971	-0.567673	-0.301226	-1.08365	-0.238786	-0.143882	0.241601	-1.38423	-0.970107	-1.09425	0.601084	-0.256777	0.325415	0.554239	-0.391649	0.231704	-0.524702
RVBD_2293c	Rv2293c	-	FALSE	FALSE	FALSE	FALSE	0.322681	0.0163656	-0.0120223	-0.919878	0.0554657	-0.0342863	-0.286798	-0.0514895	0.250087	-0.371618	-0.319844	0.212004	-0.3742	-0.100629	-0.309203	0.35464	0.767374	-0.278474	0.0130783	-0.0113441	0.162115	-0.0648873	0.227339	0.370064	0.374597	-0.210066	-0.0249591	-0.0295479	-0.0342863	0.30162	0.131546	-0.0064615	-0.102594	-0.425882	-0.375473	-0.00716794	-0.0447489	0.161082	-0.069586	-0.150363	0.0336692	0.306344	0.195508
RVBD_2329c	narK1	-	F	F	F	F	0.0339431	0.193313	-0.112852	-0.0809908	0.102877	-0.0788638	-0.21826	-0.0250308	0.0778184	-0.272367	-0.210812	-0.329991	-0.480196	-0.677753	-0.130965	-0.394479	0.14974	-0.191511	-0.190071	-0.119766	0.0114431	-0.174532	0.0527483	0.00974668	-0.00592068	0.0549135	0.0402712	-0.0186776	-0.0788638	-0.421125	-0.0956871	-0.0192617	-0.0273724	-0.136857	0.142181	0.0413662	0.0977013	0.0467673	-0.0661337	-0.0305492	-0.0449657	-0.257669	-0.00658154
RVBD_2360c	Rv2360c	-	FALSE	FALSE	FALSE	FALSE	0.151185	0.0213536	-0.344724	0.253819	-0.328194	-0.0626417	-0.46681	0.0673612	-0.427826	-0.588901	-0.359829	-0.151668	-0.15125	-1.17434	-0.113191	-0.435915	-1.09718	0.0278596	-0.246007	-0.292835	-0.221065	-0.43035	-0.200174	0.181607	-0.343097	-0.638217	-0.14259	-0.173097	-0.0626417	-0.673659	-0.316742	-0.749107	-0.085527	-1.37881	-0.28251	-0.24559	0.0554993	-0.175994	-0.119616	-0.210978	-0.317817	-0.18326	-0.284436
RVBD_2411c	Rv2411c	-	F	F	F	F	-0.29143	0.0121868	-0.256911	-0.0804664	-0.16309	-0.438012	-0.414133	-0.353596	-0.136908	-0.0836189	-0.228146	-0.26732	-0.231145	-0.0491902	-0.113647	-0.587428	-0.0744673	-0.358027	-0.430958	-0.0505779	-0.363574	-0.133514	0.000454013	0.104013	-0.277184	-0.349818	-0.235219	-0.139828	-0.438012	-0.297725	-0.258943	-0.27705	-0.134344	-0.00673663	-0.298345	0.0400638	-0.311738	-0.358978	-0.473857	-0.422301	-0.423198	-0.277091	-0.542718
RVBD_2480c	Rv2480c	-	FALSE	FALSE	FALSE	FALSE	0.360699	0.165091	0.461638	0.388641	0.365298	0.337412	0.57053	1.08195	-0.412412	-0.0585366	0.535313	0.348134	0.443654	0.361464	0.016754	-0.118679	0.428277	0.104272	0.675568	0.282806	0.172426	0.545203	0.128925	0.618509	0.484608	0.318545	0.370035	0.672451	0.337412	0.756023	0.441138	0.543656	0.377865	0.669712	0.489512	0.658383	0.263536	0.0913211	0.395938	0.422145	0.448658	0.354358	0.248523
RVBD_2620c	Rv2620c	-	TRUE	FALSE	FALSE	FALSE	-0.165618	-1.00494	-0.562408	-0.0339463	-0.874578	-1.12005	-0.459582	-0.32839	-0.153972	-0.822976	-0.50471	-0.557506	-0.651436	-0.646944	0.0417824	-4.98769	-0.36083	-0.417831	-0.439551	-0.47593	-0.356126	-1.02919	-0.778601	-0.110422	-0.229492	0.0545745	-0.875364	-0.954705	-1.12005	-0.842396	-0.663699	-1.00775	-0.925095	-0.2345	-0.25403	-0.329162	-1.18169	-0.657429	-0.904903	-0.731717	-0.293354	-0.478057	-0.614966
RVBD_2751	Rv2751	-	FALSE	FALSE	FALSE	FALSE	-0.179162	-0.0491321	0.0599303	-0.302291	0.259754	0.337893	0.88907	0.50759	-0.0268939	0.0081667	0.438485	0.731829	0.0411447	0.160711	-0.61459	-0.825739	0.529929	0.66296	0.423319	-0.277047	0.195451	-0.412736	0.113162	-0.28369	0.0646892	-0.190815	0.0986527	-0.0624847	0.337893	0.0580088	-0.878186	-0.230194	-0.0296934	-1.50292	0.226404	0.2952	0.562623	-0.041306	0.054447	-0.129591	0.084373	0.25915	0.189054
RVBD_2856B	-	-	TRUE	FALSE	TRUE	FALSE	0.362179	0.256544	-0.0296713	0.323142	0.921871	0.210351	0.639206	-0.182664	-0.67347	-0.526873	0.585963	0.780108	-0.376458	0.837711	-1.37186	0.664668	-2.36602	-0.948208	0.3191	0.269804	0.637152	0.454472	0.0653355	0.403844	-0.483738	-0.794579	0.724754	-0.0240225	0.210351	1.6058	0.94925	1.87944	-0.014946	1.07662	-3.42123	1.19454	0.580376	-0.32833	0.459725	0.366715	0.0757501	-0.22102	0.328036
RVBD_3061c	fadE22	-	TRUE	TRUE	FALSE	FALSE	-0.301419	-0.622809	-0.115358	-0.938827	-1.0801	-0.144204	-0.110105	-0.295969	-0.41164	-0.260333	-0.232877	-0.562424	-0.0378033	-0.233293	-0.0988991	-2.26981	-0.557699	0.227617	-0.261594	-0.148217	-0.15857	-0.115981	-0.243777	-0.0418818	-0.220558	-0.132604	-0.0513153	-0.252659	-0.144204	-0.393636	-0.0183432	0.0567896	-0.144996	-0.714118	-0.514926	-0.51275	0.20161	-0.0353799	-0.211313	-0.197214	-0.0574643	-0.310467	-0.0733336
RVBD_3074	Rv3074	-	FALSE	FALSE	FALSE	FALSE	-0.246916	-0.29127	-0.332217	-0.426531	-0.368611	-0.210841	-0.13192	-0.708107	-0.375165	-0.64596	-0.366977	-0.326866	-0.605045	0.0368735	-0.389994	0.241985	-0.135945	-0.239372	-0.0285074	-0.0530902	-0.14866	-0.0773439	-0.466544	0.0126002	-0.470502	0.173483	0.173916	0.0324769	-0.210841	0.295765	-0.0921261	-0.0181551	-0.144251	-0.0231538	0.130848	-0.874538	-0.786925	-0.100722	0.179675	-0.0892392	-0.20519	-0.158149	-0.149334
RVBD_3203	lipV	-	FALSE	FALSE	FALSE	FALSE	0.713748	0.22806	0.752701	-0.627067	-0.0148673	0.133129	0.735739	0.235393	0.247315	0.296617	0.401871	0.719165	0.536313	0.480747	0.328048	-0.985729	0.661513	-0.232399	0.610905	0.960251	0.121583	0.0518827	0.615082	0.170212	-0.0855215	0.635307	0.0887069	-0.366197	0.133129	0.237478	0.416359	0.34062	0.928528	-0.862539	-0.423481	0.438992	0.448784	0.0445273	0.0575944	0.196453	0.639799	0.529831	0.418034
RVBD_3277	Rv3277	-	FALSE	FALSE	FALSE	FALSE	2.46448	-6.57802	-1.40927	-6.00169	-4.98561	-0.407232	0.754377	-6.00433	3.9464	1.3254	1.22587	3.1336	-1.67288	-2.45931	-6.00232	-0.722056	-5.98819	-0.289556	-6.00024	1.04359	-1.25506	-0.978758	-1.76374	-5.97106	-5.9837	-0.104708	0.599678	0.876526	-0.407232	-0.661387	2.41152	3.17091	1.18362	1.53582	-6.00056	-6.00261	0.743274	1.94815	1.82338	1.56214	0.822618	-1.00041	0.858252
RVBD_3514	PE_PGRS57	-	FALSE	FALSE	FALSE	FALSE	-0.0886684	0.0737721	0.202486	0.121474	0.274439	0.0180094	0.275938	-0.27322	-0.235	0.559616	0.491911	0.154859	0.315629	0.552619	-0.0289221	-0.230026	0.325565	0.431154	0.508148	-0.0812445	0.213997	-0.109178	-0.2838	-0.0705536	0.197319	0.278485	0.322459	0.675608	0.0180094	0.636839	0.286645	0.355267	0.449254	0.149026	-0.101226	-0.078641	-0.0463154	0.0505846	0.182779	-0.0610384	0.324859	0.15923	0.126212
RVBD_3694c	Rv3694c	-	FALSE	FALSE	FALSE	FALSE	-0.417898	-0.223701	-0.288845	-0.29902	-1.66627	-0.0941342	0.454617	-0.142012	0.134067	0.119652	0.412673	0.328401	-0.658449	-0.714901	0.663573	0.494746	0.447343	0.360046	0.70297	-0.00861584	-0.498322	0.346915	-0.673204	-0.353858	0.242439	0.492652	-0.301367	-0.483008	-0.0941342	0.245406	0.359514	-0.468965	-0.577166	0.313981	0.0832391	0.476363	-0.0470666	-0.01249	0.721709	0.205199	0.463677	-0.311916	-0.0183808
RVBD_0432	sodC	mod09	TRUE	TRUE	TRUE	FALSE	-0.189326	-1.49793	-0.327625	-1.47557	-1.81438	-1.08638	-0.24322	-0.536862	-0.959756	-1.92045	-0.360616	-0.211115	-0.582099	-1.77675	-1.28719	-1.98455	-0.172418	-0.455522	-0.847664	-0.0993402	-0.38158	-0.646708	-1.67259	-0.746277	-1.20563	-1.13733	-0.742256	-0.990634	-1.08638	-1.0516	-0.659931	-0.595188	-0.35977	-1.87987	-1.98911	-1.26201	-0.147453	-0.790545	-0.498314	-0.663771	-0.708271	-0.98508	-0.645748
RVBD_2328	PE23	-	FALSE	FALSE	FALSE	FALSE	0.320349	-0.0308687	-0.154915	-0.185403	-0.319587	-0.162646	-0.444801	-0.206045	-0.875923	0.380236	-0.2958	-0.496346	-0.0427716	0.0909981	-0.279542	-0.52983	0.132477	0.110514	0.128735	-0.255906	0.0744088	-0.0849688	-0.531056	-0.151231	-0.0132535	0.0905837	0.0227702	0.0432908	-0.162646	0.170251	0.0714209	0.329118	-0.00217755	-0.298314	-0.0525135	-0.325639	0.394121	-0.0265437	0.223653	0.0977213	-0.210677	-0.031528	-0.111134
RVBD_3844	Rv3844	-	FALSE	FALSE	FALSE	FALSE	0.719743	-0.502872	0.747637	-0.673137	-0.110915	0.913998	0.263856	-0.517296	0.396125	-7.88127	0.534667	1.06859	0.191192	-0.178412	0.419312	1.1633	0.983531	0.430904	0.717793	0.423722	0.54853	0.3119	0.917501	0.746395	0.0454082	0.00942807	-0.254721	0.448926	0.913998	-0.059161	0.61045	0.940879	0.906508	1.92941	0.664621	1.00572	1.52229	0.21756	1.11546	0.420475	0.701791	0.222754	0.375515
RVBD_3640c	Rv3640c	mod07	F	F	F	F	-0.44392	-0.314462	-0.0467779	-0.507428	-0.277717	-0.137541	-0.621562	-0.147943	0.427285	-0.508604	-0.288919	-0.199108	-0.211356	-0.104272	-0.0816799	-0.228702	-0.186445	-0.0897255	-0.27618	0.124429	0.0279763	-0.318253	-0.525653	-0.0137118	-0.263052	0.497138	0.0307159	0.0952303	-0.137541	-0.170582	-0.0449222	0.2667	0.296199	0.940945	-0.204888	0.246778	-1.54832	0.0387485	-0.270957	0.213622	-0.0321076	-0.308824	-0.12954
RVBD_0035	fadD34	-	FALSE	FALSE	FALSE	FALSE	-0.114513	-0.173508	-0.108043	-0.158685	-0.476505	-0.0816507	-0.107983	-0.148382	-0.448275	-0.451833	-0.215161	-0.0971741	-0.185163	0.0783887	-0.0597057	-0.22099	-0.318652	0.152397	-0.104505	-0.0729062	-0.150101	0.0667085	-0.000751351	0.174211	-0.151543	0.189631	0.0467126	-0.0113156	-0.0816507	-0.0501721	-0.101987	-0.050824	-0.11465	-0.49644	-0.0357366	-0.0433101	0.131373	0.034498	-0.14913	-0.0527852	-0.0873378	-0.116938	-0.0585639
RVBD_0587	yrbE2A	-	FALSE	FALSE	FALSE	FALSE	0.405655	0.0248744	0.0170481	0.189708	0.100077	0.0397656	-0.0625294	-0.143529	-0.167509	-0.143167	0.382511	0.106659	0.347963	0.0987445	-0.69167	0.453305	-0.312988	-0.181451	-0.214459	-0.150258	0.597888	0.628053	-0.313837	0.306652	0.227389	0.35425	-0.0828388	0.15178	0.0397656	0.100451	0.184385	0.0912761	-0.0551894	-0.857554	-0.0724677	0.583401	0.391756	0.181538	0.594893	0.0305354	0.483618	-0.0514072	0.136483
RVBD_0876c	Rv0876c	-	F	F	F	F	-0.0477111	-1.1845	-0.281769	-0.404639	-2.47944	-1.12957	0.119325	-1.20509	-0.533154	-1.80697	-0.705129	-0.976486	-0.635234	0.118402	0.0863793	0.8775	0.877756	-0.267838	-0.479359	0.450328	-0.500883	-0.53606	0.140266	0.804914	-0.857668	-0.706369	-0.733122	-0.590334	-1.12957	0.136117	-0.349873	0.335524	-0.314662	-3.44161	-0.640012	0.67625	-1.1016	-1.12573	-0.932955	-0.440016	-0.673145	-0.440696	-0.9211
RVBD_1176c	Rv1176c	-	FALSE	FALSE	FALSE	FALSE	-0.0670903	0.168596	0.285698	0.402806	0.342989	0.175121	0.145531	-0.429651	0.327177	0.811701	0.311114	0.36054	-0.360252	0.0289939	0.300477	0.661595	-0.298507	0.39803	-0.0530287	-0.0264953	0.202154	0.226347	-0.896359	-0.245149	0.035055	0.267531	-0.0244674	0.408112	0.175121	0.00214373	0.327906	0.0371505	0.0747084	1.27145	0.345961	-0.84386	-0.633537	0.279122	0.091333	0.224293	0.145377	0.560407	0.134792
RVBD_1365c	rsfA	-	FALSE	FALSE	FALSE	FALSE	0.0267171	0.808809	0.415551	0.738158	-0.501401	0.181208	0.505583	0.462935	0.97276	0.0447613	0.521926	-0.285596	0.340967	1.15031	0.554718	-2.09068	0.598948	0.780814	-0.448556	-0.309132	0.187333	-0.000944255	0.112816	1.39507	-0.276006	0.713643	0.87582	0.140668	0.181208	-1.55908	0.331955	-0.279619	-0.0461725	-0.168815	0.159284	-0.449159	1.69918	0.00573812	0.203221	0.433874	0.660649	0.185052	-0.106071
RVBD_1516c	Rv1516c	-	FALSE	FALSE	FALSE	FALSE	-0.0671185	0.242472	0.165725	-0.747132	0.491973	0.0671092	0.0981304	0.84375	0.785327	-0.505179	-0.48155	-0.207922	-0.0601156	-0.0916648	0.563982	0.645757	0.162009	0.144485	0.030589	0.17789	-0.0148218	0.478636	0.315038	0.0484944	-0.290451	0.313766	0.247567	0.193409	0.0671092	0.458951	0.423148	0.449946	-0.0933743	-0.474821	0.0600326	0.724171	0.546542	0.249324	0.226322	0.0477776	-0.0886333	0.0419283	0.0875682
RVBD_1562c	treZ	-	FALSE	FALSE	FALSE	FALSE	0.614478	0.540688	0.310181	-0.252837	0.45601	0.511495	-0.0432762	-0.231652	-0.224971	0.357477	0.312489	0.107077	0.331406	0.182964	0.328048	0.46585	-0.107406	0.0355742	0.201818	0.461869	0.106195	0.143386	0.266173	0.452717	0.160911	0.051027	0.230889	0.221692	0.511495	0.989304	0.269624	0.613121	0.527283	0.265445	-0.282625	-0.450846	-0.42625	0.372593	0.361782	0.270023	0.206969	0.169024	0.0419695
RVBD_1779c	Rv1779c	-	FALSE	FALSE	FALSE	FALSE	-0.0764676	-0.169601	-0.178815	0.653913	0.390046	-0.150776	0.296078	-0.996427	0.0187646	0.466106	0.459677	0.51398	-0.450017	0.478838	-0.180667	-0.253052	0.674202	0.177023	0.316207	0.497809	-0.125756	0.0207442	0.513707	0.225906	0.161296	-0.140002	0.168286	-0.268433	-0.150776	0.310356	0.231258	0.309545	0.253093	-0.580973	0.741298	-0.150526	-0.224717	0.0973587	0.159819	0.0372367	-0.0595587	0.465997	0.0853828
RVBD_2128	Rv2128	-	FALSE	FALSE	FALSE	FALSE	0.956839	0.30701	0.191165	-0.312003	0.389425	-0.274558	-0.521622	-0.35221	-0.537304	0.489812	-0.492579	-0.205559	0.157006	0.234282	-0.379131	-0.643963	0.836614	0.736213	0.16423	0.0054945	0.320655	0.235176	0.247945	-0.0394589	-0.209128	-0.304482	-0.249996	-0.706251	-0.274558	0.475616	-0.0900733	-0.243336	-0.279249	-0.589526	0.216813	-0.734426	0.00384682	-0.327174	0.204638	0.22157	0.0732845	0.0549196	0.111422
RVBD_3741c	Rv3741c	-	TRUE	FALSE	FALSE	FALSE	-0.437404	-0.365944	0.162115	0.225355	-0.939412	-0.268438	-0.465575	-1.19725	-1.1068	0.651633	-0.327106	-0.589282	-0.203013	-0.114731	0.188955	-0.466041	-0.137703	-0.894592	-0.200372	-0.202342	0.133162	-0.144945	-0.415154	-0.114532	0.2203	-0.539838	-0.0376695	-0.215146	-0.268438	-1.59321	-0.198793	-0.41662	-0.0380882	-0.488095	-0.0258717	-0.778114	-0.22471	-0.257081	-0.245983	-0.275699	-0.222382	-0.10782	-0.141508
RVBD_3865	espF	-	F	F	F	F	-1.14494	-0.184004	0.390353	0.752758	-1.32681	-0.81189	0.388684	-2.71716	-0.849045	0.018084	-0.584483	-0.118572	-0.412683	-0.961452	0.0654009	-0.840103	-0.851861	-1.02974	0.309199	-1.03869	0.0976174	-0.349416	-0.618971	0.48877	-0.536287	-0.14141	-0.182703	-0.140953	-0.81189	-0.196232	-0.202551	0.531631	-0.406223	-0.384623	-0.216238	-0.292198	0.181146	-0.419781	-0.254363	0.510463	0.0937651	-0.174508	0.00570173
RVBD_2105	Rv2105	-	FALSE	FALSE	FALSE	FALSE	0.0154683	0.0645001	0.371363	0.853185	0.477915	0.287852	0.515246	0.653184	0.200161	-0.188545	0.487646	0.321041	0.289903	0.140343	-0.101544	0.0321559	0.204155	-0.0614236	0.57274	0.0909432	0.288712	0.135261	-0.141915	0.350345	0.239939	0.0479922	0.201028	0.511704	0.287852	0.699512	0.486726	0.640691	0.491272	0.686441	0.0674379	0.620964	-0.105879	0.172298	0.405208	0.10689	0.355643	0.145478	0.171512
RVBD_2545	vapB18	-	FALSE	FALSE	FALSE	FALSE	0.0916966	0.219265	0.169502	-0.398735	0.21235	0.249875	0.419522	-0.0129667	-0.139655	-0.0090882	0.473408	0.447853	0.341166	0.691709	-0.0575293	-1.83668	0.312154	0.564801	-0.0269296	0.236914	0.344772	0.147922	-0.307747	0.172003	0.0215455	0.107338	0.223652	0.255325	0.249875	0.0331504	0.413011	0.634561	0.143226	0.488167	0.156986	0.265169	0.705003	0.399594	0.0984399	0.275932	0.169334	0.244761	0.11476
RVBD_2214c	ephD	mod11	TRUE	FALSE	TRUE	FALSE	-0.260549	-0.0434533	0.0106342	-0.293686	-0.0977801	-0.488871	-0.000919771	0.0377584	-0.0963664	-1.28979	-0.213267	-0.502992	-0.0847201	-0.161317	-0.0920557	-0.426136	-0.44926	0.148102	-0.116145	-0.0321133	-0.0801472	-0.128697	0.0617458	-0.14779	0.0693978	0.0313356	-0.36016	-0.0175325	-0.488871	-0.964913	-0.371979	-0.393995	-0.383519	-0.110465	-0.0834807	-0.0039193	-1.26246	-0.679452	-0.896409	-0.594121	-0.916587	-0.865535	-0.444454
RVBD_0760c	Rv0760c	mod20	F	F	F	F	0.247761	0.240431	0.646556	-0.60393	0.875061	1.09014	0.0414522	0.407433	0.525787	0.678861	0.537065	0.753219	0.733602	0.809149	-0.0386988	0.501989	0.512001	0.38639	0.0798084	0.594581	0.39558	0.641468	-0.614025	0.517028	1.04143	-2.18482	0.721048	1.04636	1.09014	0.455013	0.165124	-0.189413	-0.389225	0.936499	0.159867	1.05509	0.731288	-0.255065	-0.0753739	0.758406	0.83197	0.467144	0.50594
RVBD_0379	secE2	-	FALSE	FALSE	FALSE	FALSE	-0.358948	-0.765835	-0.720225	-0.55127	-0.875015	-0.341817	-1.30675	-0.263622	-0.519307	0.197989	-0.769679	-0.605	-0.446294	0.294912	-1.04737	0.454613	-1.73579	-0.120032	0.00448338	-0.254292	-0.596455	-0.482821	-0.458678	-0.868901	-0.18447	-0.223926	-0.323482	-0.230618	-0.341817	0.303087	-0.551471	-0.251319	-0.188439	-1.53631	-0.922027	-0.896063	0.373465	0.38196	0.170394	-0.262198	-0.283454	0.0116574	-0.768711
RVBD_0471c	Rv0471c	-	FALSE	FALSE	FALSE	FALSE	0.0264759	-0.233212	-0.256781	-0.153242	0.100976	-0.154635	-0.311871	-0.236767	-0.0153732	-0.0527075	-0.234659	-0.0755441	-0.205199	-0.122053	-0.11117	-0.43505	-0.524324	-0.334345	-0.262489	-0.178263	-0.0630172	-0.071805	-0.0300862	-0.301854	-0.00303504	-0.11204	-0.214081	-0.249954	-0.154635	-0.138545	-0.234875	-0.0735754	-0.151464	0.140952	0.0320121	-0.446379	0.147212	0.0499528	-0.101011	-0.164034	-0.110524	-0.182957	-0.0566707
RVBD_0590	mce2B	-	FALSE	FALSE	FALSE	FALSE	0.16713	-0.2847	0.0119598	0.203457	0.0783443	0.0592504	-0.137296	-0.942709	-0.134616	0.169968	0.408481	0.355435	-0.277128	0.382204	0.625517	1.06553	0.300391	-0.00201127	-0.00582417	0.0231907	-0.371894	0.150691	-0.0550461	0.535438	-0.888545	-0.512458	-0.0980268	-0.126023	0.0592504	0.0470937	-0.169389	0.334939	-0.230105	-1.68745	-1.35536	0.459095	-1.69019	-0.207377	0.161591	-0.00807182	0.135665	-0.193375	-0.276165
RVBD_1330c	pncB1	-	FALSE	FALSE	FALSE	FALSE	-0.260598	-0.562009	0.0540345	-0.195821	-0.069665	-0.219662	-0.000135284	-0.0754851	0.0168919	0.19764	-0.327904	-0.504222	0.000147749	0.0381745	-0.00281834	0.0836505	-0.195819	0.390261	0.109526	0.0306647	-0.28533	-0.444804	-0.125854	-0.000118577	-0.200982	-0.357653	-0.273517	-0.197551	-0.219662	-0.494621	-0.0540085	-0.121447	-0.510074	-0.957842	-0.335133	-0.760722	-0.188966	-0.428193	-0.00929731	-0.325947	-0.166609	-0.206057	0.006566
RVBD_3655c	Rv3655c	-	FALSE	FALSE	FALSE	FALSE	0.343394	-0.922997	0.437585	-0.48269	1.12833	-0.212399	-0.309466	-1.58578	0.0798898	-0.787487	-0.680668	-1.52931	0.298764	0.980105	0.879364	0.445491	0.50751	0.706642	0.0396611	-0.506421	-0.578295	0.0636929	0.129377	0.7276	0.246703	-0.812409	0.222754	-0.12322	-0.212399	0.296362	-0.326696	-0.298764	0.122374	0.235041	0.473389	0.031458	-2.15774	0.0509413	-0.163846	0.140049	0.0828049	-0.241567	-0.150309
RVBD_3632	Rv3632	mod09	TRUE	FALSE	TRUE	FALSE	0.0603719	-0.525135	-0.503858	-0.38055	-0.859309	-0.46903	-0.308259	-0.397638	0.179917	0.245203	-0.300925	-0.397897	-1.34286	-1.07816	-1.81062	-0.812029	-0.192155	-1.03035	-0.461077	-0.98266	-0.372656	-1.10079	-0.115309	0.581924	-0.645663	0.0750218	-0.00398365	0.12376	-0.46903	-1.46909	-0.735285	0.163969	-0.610657	-0.404192	0.381682	0.546292	0.424216	-0.712515	-1.24475	-0.695023	-0.630014	-0.705402	-0.606891
RVBD_1035c	Rv1035c	-	FALSE	FALSE	FALSE	FALSE	-0.0684003	0.023559	1.20359	-1.36558	1.08438	1.08942	1.29151	0.295904	-3.543	0.581315	0.885651	0.645166	-4.27616	0.507689	-0.174069	1.15081	-2.41103	-1.03852	0.812989	-0.123296	0.315772	-0.223012	1.0102	-0.669057	-0.345272	-1.50811	1.0658	1.48593	1.08942	0.055942	0.167983	-0.149245	0.303868	1.70263	-0.00830733	-2.38101	2.02413	-0.174941	0.807838	-0.793424	0.403138	-0.315257	0.340779
RVBD_1255c	Rv1255c	-	FALSE	FALSE	FALSE	FALSE	0.14948	-0.150847	0.192969	-1.47195	0.670908	-0.306171	0.0349618	-1.33646	0.450292	-0.868613	-0.604551	-0.818928	0.409643	0.956982	-0.376602	-0.0634365	0.58365	-0.23657	0.376197	0.0572522	0.201548	-0.236511	-0.275037	0.779556	0.282544	-0.17237	-0.0606523	-0.549116	-0.306171	0.0759655	0.0048145	-0.327131	0.233575	0.545685	-0.984187	0.112286	-0.964702	-0.110447	0.177859	0.172977	-0.23835	-0.115307	-0.0918633
RVBD_3176c	mesT	-	FALSE	FALSE	FALSE	FALSE	0.300474	-0.129545	0.306499	-0.00337804	-0.3751	0.471389	0.778172	0.481995	-0.27455	0.652	0.437191	0.655784	-0.237516	0.0521932	0.0963816	0.296384	0.208925	-0.361141	0.24924	0.188091	-0.208237	0.0476358	-0.00224432	-0.924185	-0.193791	-0.338779	0.037508	0.424863	0.471389	-0.239116	0.1729	0.368507	0.141997	0.156588	-1.10919	-0.381578	-1.14888	-0.0301779	0.295817	0.208073	0.0773029	0.29406	0.0970163
RVBD_1999c	Rv1999c	-	FALSE	FALSE	FALSE	FALSE	-0.0598605	-0.284188	0.0128767	-0.272373	-0.107583	-0.198288	-0.370509	-0.283641	-0.142909	-0.168297	-0.273786	-0.193763	-0.0145114	-0.27045	-0.0273353	0.033367	-0.0904015	-0.24115	-0.0619008	0.0251137	-0.118363	-0.14846	-0.0761201	0.13281	-0.103627	-0.0530911	-0.086344	-0.305793	-0.198288	-0.410556	-0.04857	-0.0127043	-0.156521	-0.201374	-0.341659	-0.245395	-0.509637	-0.158442	-0.0383231	-0.050412	-0.161526	-0.0617977	-0.223115
RVBD_2668	Rv2668	-	TRUE	FALSE	FALSE	FALSE	-0.370591	-0.833628	-0.51004	-0.286754	-1.17848	-0.901406	-0.0258219	-0.899196	-0.474106	-0.552629	-0.39676	-0.187977	-0.757559	-0.236982	-1.62088	-3.3284	0.173202	-0.152703	-0.0667057	-0.683538	-0.35162	-1.07648	0.193511	-0.581713	-0.420807	0.418709	-0.467635	-0.839186	-0.901406	-0.432018	-0.36596	-0.776787	-0.508893	-0.571681	-0.373786	-1.25078	0.000815797	-0.835392	-0.67245	-1.0527	-0.302646	-0.50325	-0.602157
RVBD_3492c	Rv3492c	mod06	TRUE	FALSE	TRUE	TRUE	-0.883105	-0.854817	-0.908317	-3.6174	-2.16052	-1.6892	-0.563072	-2.28383	-1.00926	-0.967573	-0.420944	-0.32775	-0.723362	-3.57234	-3.79073	-0.69493	-1.87503	-2.08977	-1.87969	-2.74295	-1.25993	-2.08782	-1.53841	-1.61337	-2.15842	-3.14041	-1.83367	-1.89583	-1.6892	-0.308209	-1.46578	-1.01489	-1.79158	-1.01903	-1.7244	-0.952415	-2.20962	-1.06013	-1.05974	-2.06192	-2.41934	-1.20285	-1.53103
RVBD_1252c	lprE	-	F	F	F	F	-0.338507	-0.103067	-0.0775829	-0.165617	-0.774831	0.0202451	0.0274644	-0.278838	-1.28621	0.25289	0.314672	0.0748954	-0.221145	-0.0258442	-0.335786	-0.661778	0.188964	-0.215204	-0.270903	-0.245669	-0.276703	-0.391573	-0.276328	-0.798581	-0.486282	-0.769997	-0.277667	-0.362825	0.0202451	-0.112769	-0.12845	0.501242	-0.003116	-0.189148	-0.712228	0.0879041	-0.335138	0.000669006	0.0508617	0.133023	-0.139308	0.122667	-0.246293
RVBD_0211	pckA	mod03	TRUE	FALSE	FALSE	FALSE	-0.882719	1.09326	-0.106237	2.14611	2.83417	-0.742011	3.00176	1.40484	0.803451	-6.07239	1.76066	1.0647	1.86105	-7.07101	-2.94867	-6.06591	-7.07222	-1.71241	-2.24848	-3.22227	-1.26544	-3.22517	-1.88144	-7.05446	-7.05938	0.530012	-0.375848	-1.60011	-0.742011	-1.73915	-4.65924	-6.0603	-1.46187	-6.05313	-7.05697	-7.07533	-7.07221	-1.12515	0.505976	-2.50699	-7.07044	0.66833	-1.25086
RVBD_0259c	Rv0259c	mod20	F	F	F	F	0.176524	-0.10133	-0.398398	0.317644	1.38417	0.609382	0.227773	-0.14236	-1.02366	0.125651	0.52466	0.22035	-1.38436	0.526316	-5.83683	0.30187	-0.50917	-0.193833	-0.0792118	0.380843	-0.0256232	-0.170277	-0.807069	0.728911	-0.274423	-0.599189	-0.0340755	0.268474	0.609382	0.49387	0.335667	0.0635561	0.567431	0.183317	-0.869123	0.328893	0.614081	0.0414374	0.307482	-0.00923739	-0.310261	-0.00437391	-0.161258
RVBD_2571c	Rv2571c	-	FALSE	FALSE	FALSE	FALSE	-0.115025	-0.524864	-0.509177	-0.68395	-1.8396	0.131338	-0.167659	-0.728508	0.105885	-0.336866	0.469393	0.382683	-0.104195	0.069016	0.0322642	-1.40855	-0.1718	0.517235	-0.401419	-0.0418916	-0.499525	-0.41965	-0.86597	-0.483617	-0.156148	-0.52728	-0.452919	-0.804976	0.131338	-0.266115	-0.143299	-0.918453	-0.0895283	-0.370325	0.0351597	0.0462864	-0.923158	-0.145556	0.0216747	-0.0318232	-0.135119	0.0531652	-0.479366
RVBD_0201c	Rv0201c	mod03	TRUE	TRUE	FALSE	FALSE	0.21106	-1.38538	-0.0125651	-0.844538	0.815777	-0.273237	-0.92308	-1.35889	-1.64047	-1.63664	-0.379162	0.315648	0.1061	-1.06833	0.305654	0.278307	-2.11401	0.0432076	-0.942034	-0.13565	-0.318577	-0.129871	0.533246	-1.21227	-0.195449	-0.802812	-0.292469	-0.868771	-0.273237	-0.466552	-0.864224	-0.829853	-0.480964	-2.78635	-0.278146	-0.510967	-0.264696	0.0383163	-0.0474568	-0.196712	-0.115662	-0.406752	0.464295
RVBD_0052	Rv0052	-	FALSE	FALSE	FALSE	FALSE	-0.172115	-0.0077469	-0.146777	-0.222704	0.166866	-0.0836199	0.264646	-0.528211	-0.225047	-0.307429	0.331205	0.175043	-0.33886	0.260497	-0.591739	-0.119942	0.38504	-0.0432703	-0.0541754	0.234921	0.119207	0.154167	0.638609	-0.0402437	-0.20473	0.300029	-0.33297	0.0395322	-0.0836199	0.434655	0.379101	-0.452093	-0.230062	0.688203	0.2802	0.0127289	0.587383	-0.151057	-0.078049	-0.134145	0.253026	0.231177	0.140755
RVBD_0272c	Rv0272c	-	FALSE	FALSE	FALSE	FALSE	0.43703	0.104607	-0.523219	0.457212	0.260787	0.0967435	0.377598	0.15576	-0.919576	0.0523231	0.351936	0.151715	0.00525359	0.802239	1.17999	-0.346733	-1.15206	0.851764	0.503407	-0.281279	0.284355	-0.058905	-0.258011	0.135885	0.010489	-0.0679663	-0.382279	-0.114813	0.0967435	-0.335799	0.130152	0.706451	-0.0577653	0.753038	-1.01522	0.454708	0.255584	-0.0662292	0.099143	-0.0639823	0.334849	0.129324	0.0478878
[truncated: 3,219 more rows]
[truncated: 17 more columns]

## Sheet: Qvals
			Required	Required	Required	Core	Cluster A										Cluster B																Cluster C											Cluster D
[truncated: 4,112 more rows]
[truncated: 17 more columns]
