# Supplementary material for: Host-pathogen genetic interactions underlie tuberculosis susceptibility in genetically diverse mice
Source: eLife. 2022 Feb 3;11:e74419. doi: 10.7554/eLife.74419 (PMC8846590; doi:10.7554/eLife.74419)
Supplement: Figure 4—source data 2. — CFU and normalized barcode counts from Mtb mutant mini-pool infection in individual mice, including mbtA, glpK, pstC2, eccB1, RNaseJ, and WT (H37Rv). [file elife-74419-fig4-data2.xlsx]

## Sheet: Sheet1
	GlpK	PstC2	EccB1	MbtA	RNAseJ	H37Rv	CFU
	qTag_22	qTag_24	qTag_25	qTag_27	qTag_29	qTag_17	CFU/mouse
Day0-1	65032	185727	196237	3129	149147	186177	39000
Day0-2	62783	134065	177072	644	155383	205692	39000
B6-mouse1	41966	147280	160581	2281	221013	188244	10300000
B6-mouse2	15903	186296	152280	31	205900	154874	1600000
B6-mouse3	7121	171455	133326	168	199802	156722	1100000
B6-mouse4	35059	141491	178553	1280	193291	187404	8600000
B6-mouse5	9834	131871	158121	736	203387	144237	5500000
CC051-mouse1	56529	101387	151335	1	185523	143846	180000
CC051-mouse2	22824	73756	22046	1	95029	67548	170000
CC051-mouse3	90499	142455	179171	553	183974	176088	270000
PWK-mouse1	82880	109119	25155	5712	210879	190868	9000000
PWK-mouse2	77238	112753	6188	33	205974	187263	6000000
PWK-mouse3	86617	167904	25308	2391	195982	197923	7400000
PWK-mouse4	118795	146550	65790	136	205083	210893	5400000
PWK-mouse5	45354	164175	33152	1	187839	206546	1550000
CC042-mouse1	114689	172540	27579	1570	202855	177767	40000000
CC042-mouse2	37424	206352	50677	110	176972	175048	12000000
CC042-mouse3	81162	160249	20494	1517	206631	179841	24000000
CC042-mouse4	104565	159795	32680	1540	222218	184326	37000000
CC005-mouse1	54926	204171	37987	449	196200	181355	11900000
CC005-mouse2	52970	199444	68553	682	162082	189003	4600000
CC005-mouse3	52324	169656	63934	4	151719	188432	5400000
CC005-mouse4	21174	161296	57369	4	158849	187743	12200000
CC018-mouse1	64582	171787	1742	4483	204418	180444	25500000
CC018-mouse2	101079	185732	5173	8054	200578	182649	160000000
CC018-mouse3	101639	195727	1618	5148	198619	179621	35000000
