# Supplementary figures and images for: Host-pathogen genetic interactions underlie tuberculosis susceptibility in genetically diverse mice
Source: eLife journal article supplement (doi:10.7554/elife.74419), 2022-02-03

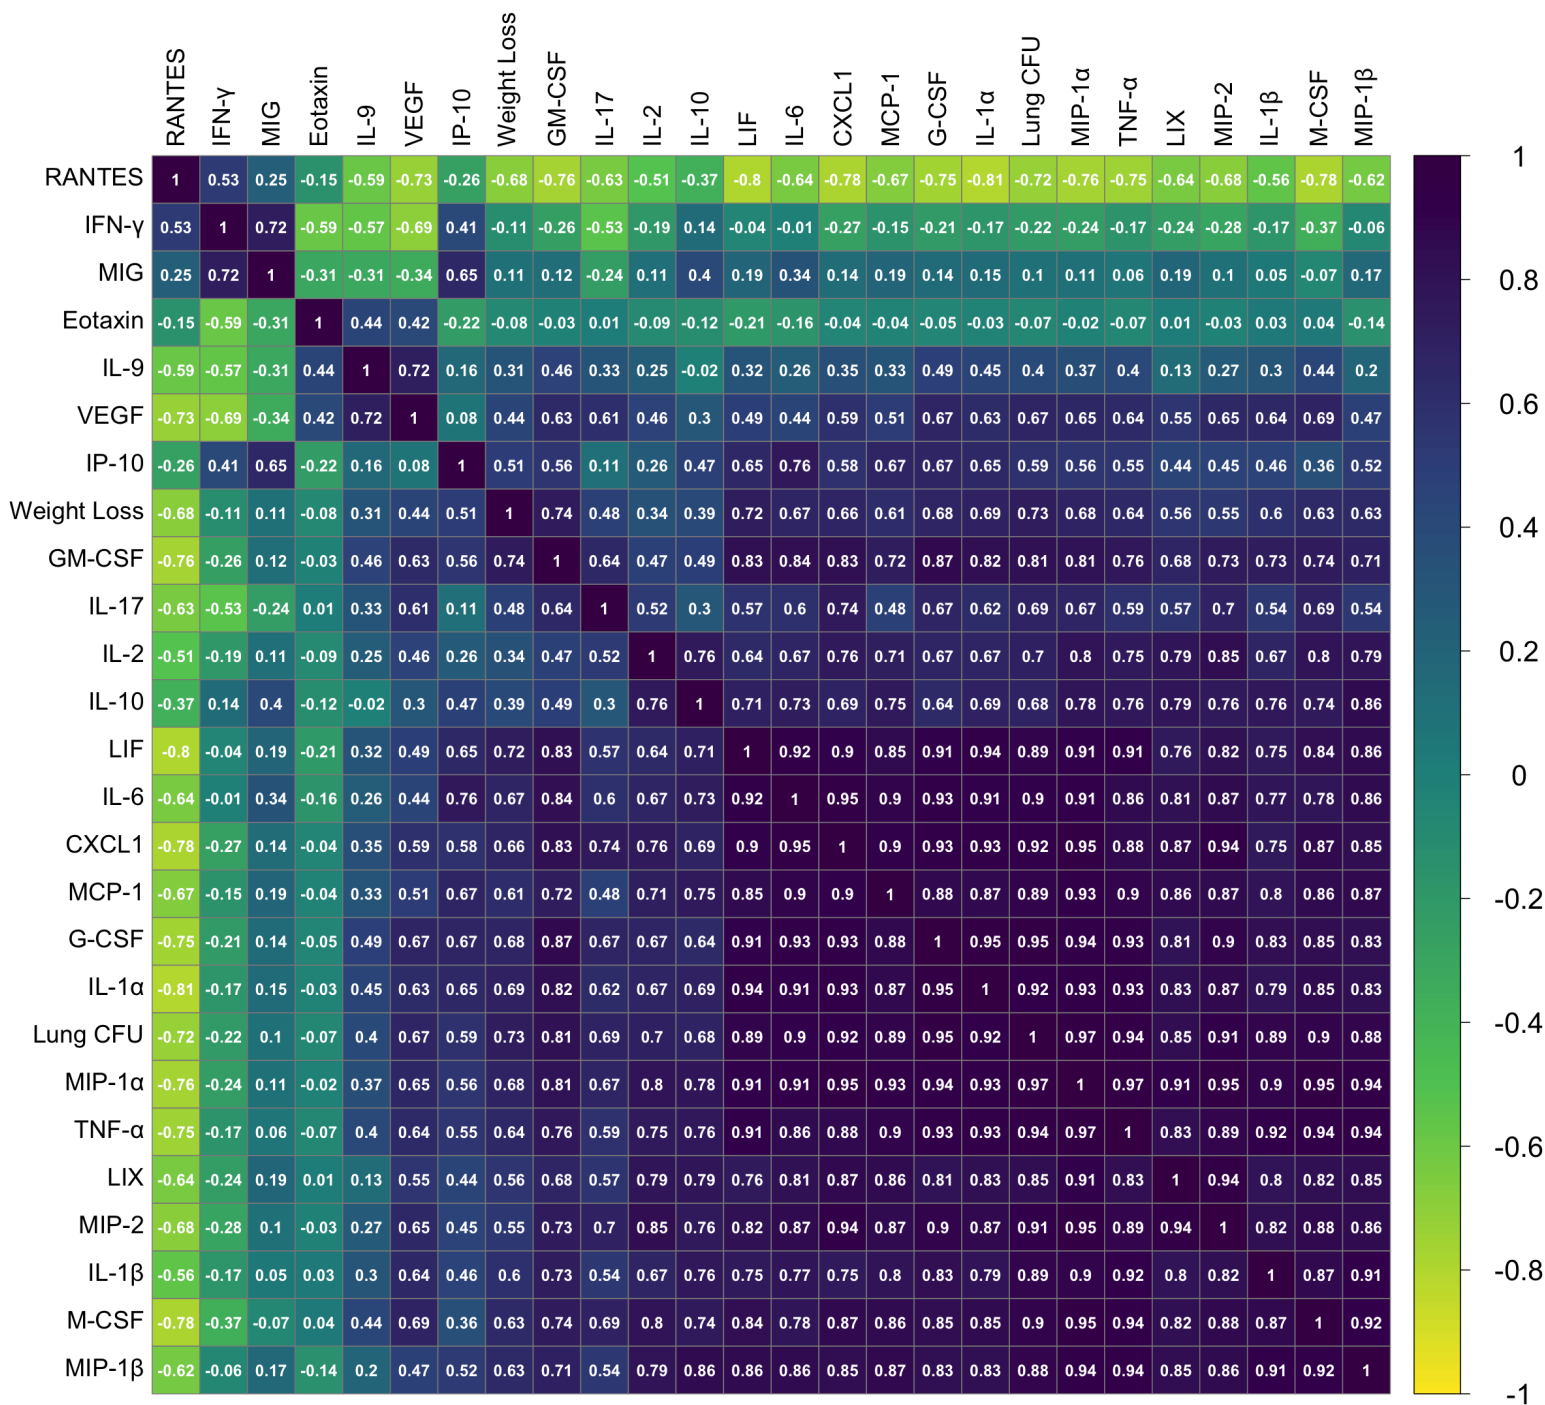

Supplement: supp [file elife_poa_e74419_Figure_1_figure_supplement2.pdf › elife_poa_e74419_Figure_1_figure_supplement2.pdf]

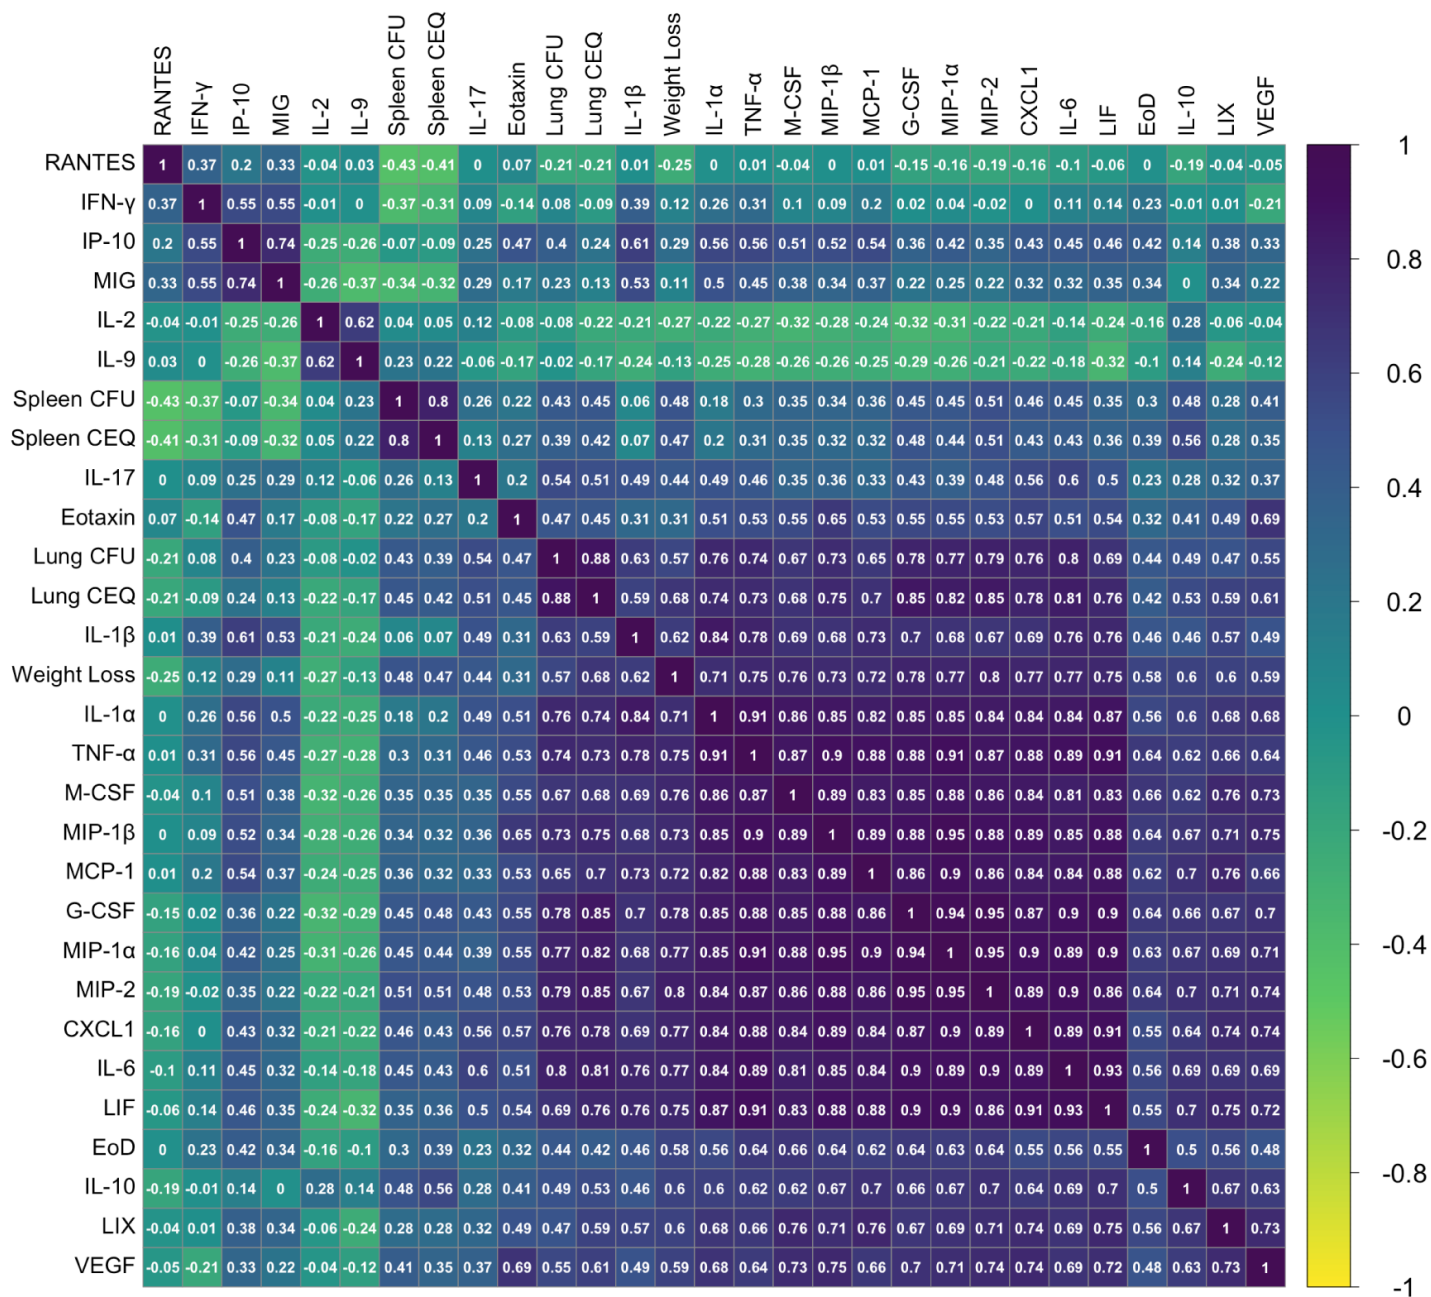

Supplement: supp [file elife_poa_e74419_Figure_1_figure_supplement_1.pdf › elife_poa_e74419_Figure_1_figure_supplement_1.pdf]

Essential Genes by 2x6 Run

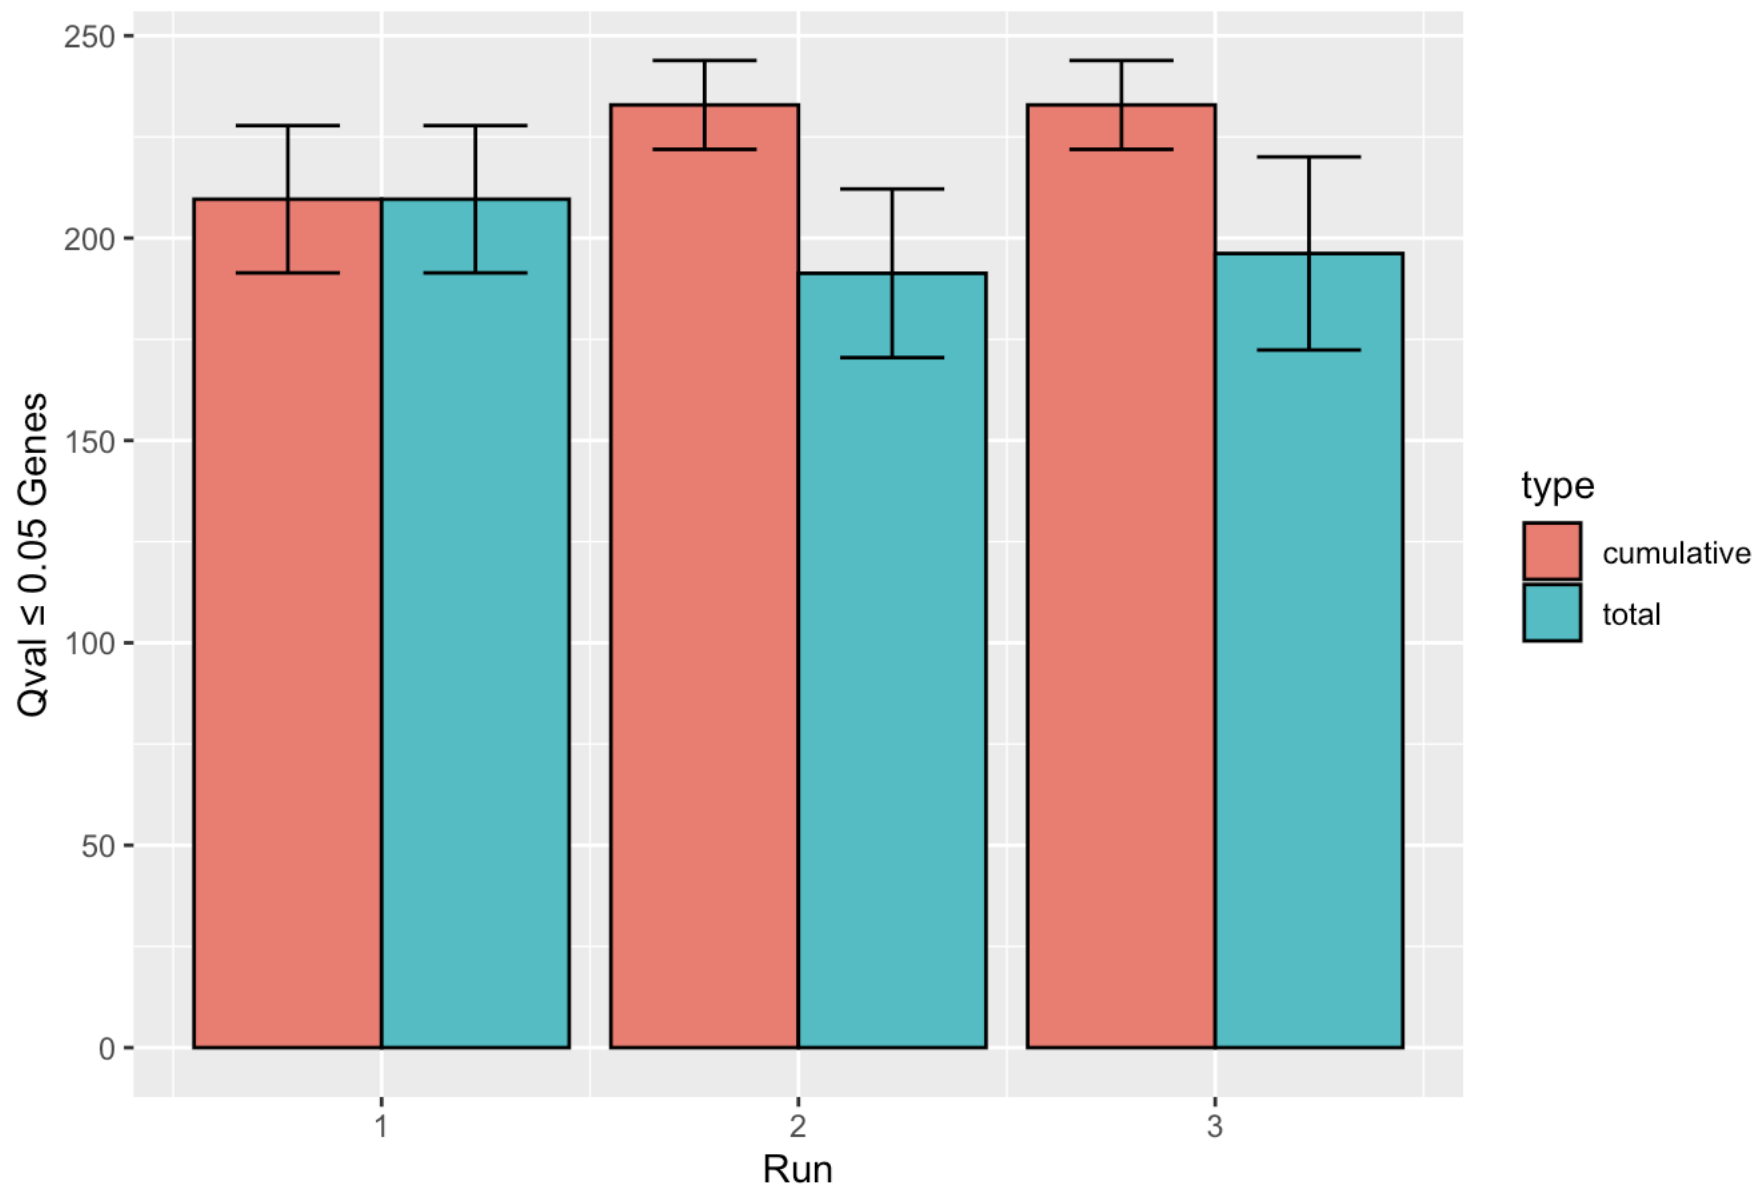

Supplement: supp [file elife_poa_e74419_Figure_4_figure_supplement_1.pdf › elife_poa_e74419_Figure_4_figure_supplement_1.pdf]

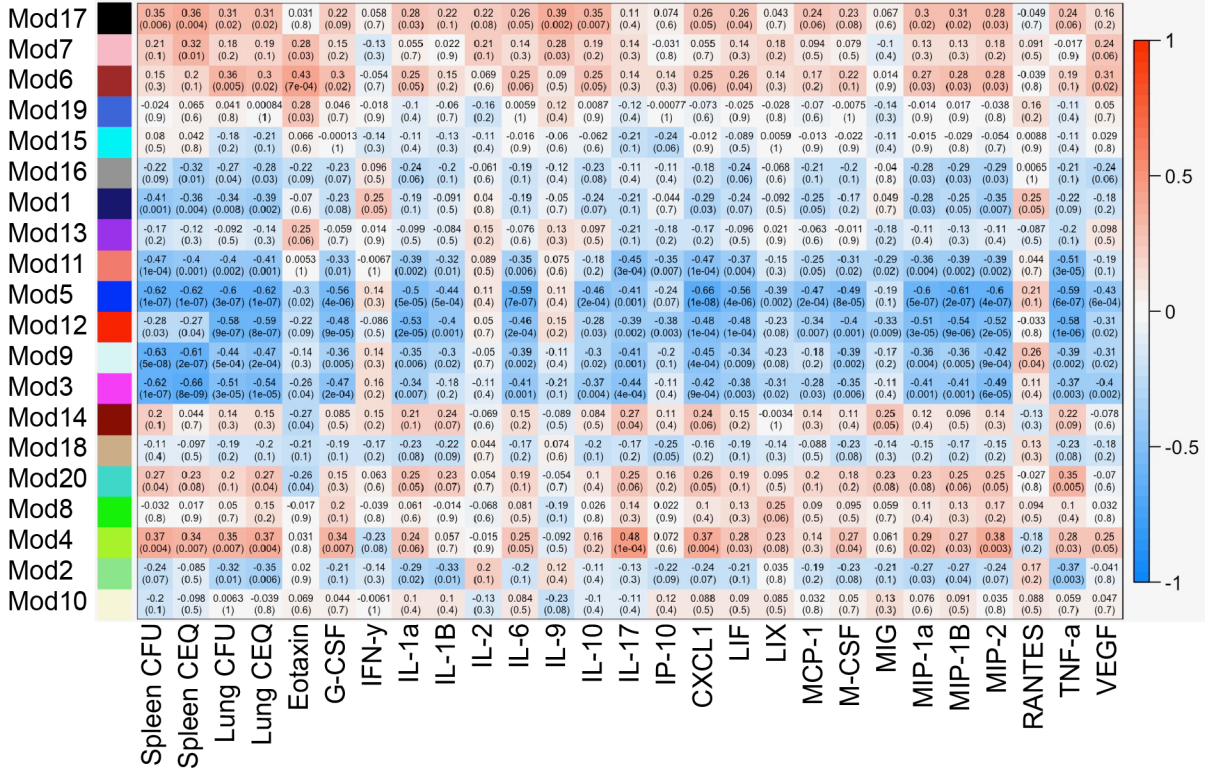

Supplement: supp [file elife_poa_e74419_Figure_5_figure_supplement_1.pdf › elife_poa_e74419_Figure_5_figure_supplement_1.pdf]
